# Supplementary material for: Physical and nutrient stimuli differentially modulate gut motility patterns, gut transit rate, and transcriptome in an agastric fish, the ballan wrasse
Source: PLoS One. 2021 Feb 11;16(2):e0247076. doi: 10.1371/journal.pone.0247076 (PMC7877642; doi:10.1371/journal.pone.0247076)
Supplement: S1 Table — (XLSX) [file pone.0247076.s003.xlsx]

## Sheet: Protein vs Cellulose
Gene_ID	Gene_description	Gene_symbol	Gene symbol Human	baseMean	log2FoldChange	pvalue	padj
ENSLBEG00000010833	glucose-6-phosphatase-like [Source:NCBI gene;Acc:109992407]	g6pc	G6PC	51.7517	4.04499	0.00171062	0.160059
ENSLBEG00000008522	0	0	#N/A	7.47408	3.84585	8.8288e-05	NA
ENSLBEG00000019158	0	0	#N/A	310.239	3.72722	4.0392e-06	0.0112504
ENSLBEG00000006343	0	0	#N/A	39.239	3.72163	0.00105809	0.144446
ENSLBEG00000022287	serine protease inhibitor 2.1-like [Source:NCBI gene;Acc:109983361]	serpina7	SERPINA9	26.042	3.57815	0.00665432	0.240458
ENSLBEG00000014851	0	0	#N/A	41.5774	3.57777	0.00111555	0.148635
ENSLBEG00000012969	interleukin 1 beta [Source:NCBI gene;Acc:109997024]	IL1b	IL1B	15.2394	3.2114	0.000800673	0.123802
ENSLBEG00000025619	insulin-like growth factor-binding protein 1 [Source:NCBI gene;Acc:110001010]	igfbp1a	IGFBP1	439.405	2.95131	0.000160174	0.064853
ENSLBEG00000011909	clumping factor A-like [Source:NCBI gene;Acc:109996490]	spp1	SPP1	141.158	2.9267	0.000913312	0.127899
ENSLBEG00000025694	0	0	#N/A	27.7443	2.88596	0.00852608	0.261051
ENSLBEG00000009178	Krueppel-like factor 15 [Source:NCBI gene;Acc:109983186]	KLF15	KLF15	61.0953	2.71754	0.000239465	0.0782017
ENSLBEG00000023480	0	0	#N/A	170.11	2.67236	0.000900178	0.127899
ENSLBEG00000000959	0	0	#N/A	9.61007	2.66144	0.00150403	0.158949
ENSLBEG00000015240	uncharacterized LOC109993697 [Source:NCBI gene;Acc:109993697]	il11a	IL11	16.1091	2.57539	0.00138742	0.158949
ENSLBEG00000018484	SET and MYND domain containing 1 [Source:NCBI gene;Acc:109981637]	SMYD1	SMYD1	7.67957	2.55482	0.0093311	NA
ENSLBEG00000009240	keratin, type I cytoskeletal 13-like [Source:NCBI gene;Acc:109990660]	krt15	KRT17	477.213	2.54683	0.00157641	0.158949
ENSLBEG00000021746	hydroperoxide isomerase ALOXE3-like [Source:NCBI gene;Acc:109994925]	ALOXE3	ALOXE3	55.1946	2.54022	3.27911e-06	0.0112504
ENSLBEG00000015505	hemopexin-like [Source:NCBI gene;Acc:109996574]	hpx	MMP20	32.3167	2.49674	0.000713353	0.122484
ENSLBEG00000001470	apolipoprotein C-I, acidic form-like [Source:NCBI gene;Acc:109996288]	APOC1A	APOC1	132.171	2.44178	0.00976835	0.272384
ENSLBEG00000014991	GTPase IMAP family member 4-like [Source:NCBI gene;Acc:109994233]	GIMAP4	GIMAP4	86.6252	2.29786	0.00681942	0.240458
ENSLBEG00000024688	gap junction Cx32.2 protein-like [Source:NCBI gene;Acc:109986420]	GJB4	GJB4	12.8167	2.27492	9.86209e-05	0.0497737
ENSLBEG00000024961	cystathionine beta-synthase-like [Source:NCBI gene;Acc:110001340]	cbs	CBS	1206.59	2.24738	1.8974e-05	0.0310312
ENSLBEG00000010012	bactericidal permeability-increasing protein-like [Source:NCBI gene;Acc:109983171]	BPI	BPI	757.558	2.23204	5.85667e-05	0.0443377
ENSLBEG00000021494	solute carrier family 13 member 5-like [Source:NCBI gene;Acc:109998950]	slc13a5b	SLC13A5	1153.65	2.23105	0.00126083	0.152167
ENSLBEG00000023139	phosphatase and actin regulator 3-like [Source:NCBI gene;Acc:109982808]	phactr3a	PHACTR3	5.63026	2.22875	0.00599403	NA
ENSLBEG00000018760	0	SELE	SELE	37.0324	2.22388	8.5052e-05	0.0497737
ENSLBEG00000018632	serotransferrin-like [Source:NCBI gene;Acc:109991434]	tfa	LTF	131.286	2.19091	0.00551566	0.223559
ENSLBEG00000014560	0	0	#N/A	31.9873	2.18169	0.000575255	0.108874
ENSLBEG00000019217	0	0	#N/A	36.4954	2.13408	9.72945e-05	0.0497737
ENSLBEG00000000173	0	0	#N/A	19.7782	2.13348	0.0030788	0.189216
ENSLBEG00000009804	neuropeptide B [Source:NCBI gene;Acc:109999356]	npb	NPB	114.619	2.00859	4.05297e-06	0.0112504
ENSLBEG00000019922	0	0	#N/A	4.14613	1.98706	0.00424217	NA
ENSLBEG00000025810	nicotinate phosphoribosyltransferase [Source:NCBI gene;Acc:110000354]	naprt	NAPRT	37.4774	1.98614	0.00720869	0.247039
ENSLBEG00000010389	three-finger toxin MALT0070C-like [Source:NCBI gene;Acc:109997570]	0	#N/A	63.993	1.9809	0.00124859	0.15179
ENSLBEG00000002154	cyclic AMP-responsive element-binding protein 5-like [Source:NCBI gene;Acc:109989929]	CREB5	CREB5	7.63919	1.95997	0.000744252	NA
ENSLBEG00000016858	mannose receptor C-type 1 [Source:NCBI gene;Acc:109994249]	mrc1a	MRC1	89.6947	1.9396	9.64454e-06	0.0225084
ENSLBEG00000003913	growth/differentiation factor 6-A-like [Source:NCBI gene;Acc:109983874]	gdf6	GDF6	152.135	1.90157	0.00509602	0.221059
ENSLBEG00000016537	0	TNFRSF12A	TNFRSF12A	21.4763	1.89442	4.8501e-07	0.0051814
ENSLBEG00000021961	coagulation factor II (thrombin) receptor [Source:ZFIN;Acc:ZDB-GENE-060526-30]	f2r	F2R	37.1471	1.8875	0.000116606	0.0524886
ENSLBEG00000019113	0	RF00191	RF00191	33.4809	1.87899	0.00481247	0.215607
ENSLBEG00000017493	organic solute transporter subunit alpha-like [Source:NCBI gene;Acc:109998267]	slc51a	SLC51A	6.51179	1.85862	0.0084522	NA
ENSLBEG00000015854	C-C motif chemokine 20-like [Source:NCBI gene;Acc:110001778]	CCL20	CCL20	73.1647	1.84816	0.00850687	0.261051
ENSLBEG00000020777	inhibin subunit beta A [Source:NCBI gene;Acc:109992497]	inhbaa	INHBA	121.401	1.82014	0.008149	0.255596
ENSLBEG00000019186	natriuretic peptide C [Source:NCBI gene;Acc:109996626]	nppc	NPPC	13.0683	1.81764	0.00151699	0.158949
ENSLBEG00000011215	TNFAIP3-interacting protein 1-like [Source:NCBI gene;Acc:109983803]	TNIP1	TNIP1	70.1312	1.80929	0.00368366	0.202446
ENSLBEG00000017401	0	0	#N/A	14.8321	1.80881	0.00058754	0.109949
ENSLBEG00000023848	netrin-G2-like [Source:NCBI gene;Acc:109984480]	NTNG2	NTNG2	133.926	1.77277	0.000339834	0.0907411
ENSLBEG00000006151	heat shock 70 kDa protein 1 [Source:NCBI gene;Acc:110005691]	HSPA2	HSPA2	9.72468	1.73537	0.00382629	0.2048
ENSLBEG00000001406	ubiquitin domain-containing protein 2-like [Source:NCBI gene;Acc:109985300]	ubtd2	UBTD2	232.179	1.71908	0.0061705	0.233304
ENSLBEG00000020321	aquaporin-1-like [Source:NCBI gene;Acc:109999589]	aqp1	AQP1	54.4349	1.69122	0.0067035	0.240458
ENSLBEG00000024678	0	0	#N/A	140.891	1.68761	0.000915644	0.127899
ENSLBEG00000018541	threonine--tRNA ligase, cytoplasmic-like [Source:NCBI gene;Acc:110005204]	tarsl2	TARSL2	41.0354	1.64646	0.000826534	0.123802
ENSLBEG00000019651	G-protein coupled receptor 84-like [Source:NCBI gene;Acc:109993781]	gpr84	GPR84	8.81691	1.64553	0.00152551	NA
ENSLBEG00000008510	disheveled-associated activator of morphogenesis 1-like [Source:NCBI gene;Acc:109989496]	DAM1	#N/A	7.06631	1.59796	0.00673822	NA
ENSLBEG00000005565	hyaluronan synthase 2 [Source:NCBI gene;Acc:109984833]	has2	HAS2	27.1209	1.59324	0.0016146	0.158949
ENSLBEG00000020430	keratin, type II cytoskeletal 8-like [Source:NCBI gene;Acc:109993815]	KRT8	KRT8	320.719	1.58792	0.00116799	0.148958
ENSLBEG00000007342	S-adenosylmethionine synthase-like [Source:NCBI gene;Acc:109994653]	mat1a	MAT1A	206.541	1.58206	0.00149673	0.158949
ENSLBEG00000003384	calcitonin related polypeptide beta [Source:NCBI gene;Acc:109986006]	CALCB	CALCB	55.4966	1.56894	0.000179535	0.064853
ENSLBEG00000028211	desmoglein-3-like [Source:NCBI gene;Acc:109993407]	DSG3	DSG3	39.2691	1.56819	0.00335836	0.195572
ENSLBEG00000011540	probable carboxypeptidase X1 [Source:NCBI gene;Acc:110001132]	CPXM1	CPXM1	104.164	1.5582	0.00048438	0.0995969
ENSLBEG00000014147	growth/differentiation factor 8-like [Source:NCBI gene;Acc:109991956]	mstna	GDF11	879.513	1.55321	0.00990095	0.272776
ENSLBEG00000019615	astrotactin 1 [Source:NCBI gene;Acc:109980672]	astn1	ASTN1	6.82201	1.54975	0.0015306	NA
ENSLBEG00000014825	leucine rich repeat containing 18a [Source:ZFIN;Acc:ZDB-GENE-090313-323]	lrrc18a	LRRC18	7.35863	1.53987	0.00796344	NA
ENSLBEG00000021762	Kruppel like factor 5 [Source:NCBI gene;Acc:109987895]	pibf1	PIBF1	34.6306	1.53825	0.00863101	0.262796
ENSLBEG00000003567	regulator of G-protein signaling 5-like [Source:NCBI gene;Acc:109986568]	rgs16	RGS16	135.94	1.53003	0.000362878	0.0921129
ENSLBEG00000005024	0	0	#N/A	23.685	1.51786	5.62773e-05	0.0443377
ENSLBEG00000013126	general transcription factor IIIAa [Source:ZFIN;Acc:ZDB-GENE-041006-1]	gtf3aa	GTF3A	17.7068	1.48035	0.000628409	0.112539
ENSLBEG00000021624	fetuin-B-like [Source:NCBI gene;Acc:109993821]	FETUB	FETUB	98.2748	1.47039	0.00347553	0.197401
ENSLBEG00000009465	0	0	#N/A	14.2788	1.46523	0.00266699	0.18291
ENSLBEG00000023706	0	0	#N/A	17.803	1.46097	0.00416874	0.209759
ENSLBEG00000017359	proline dehydrogenase 1, mitochondrial-like [Source:NCBI gene;Acc:109981239]	prodha	PRODH	43.7376	1.41512	0.00641914	0.238108
ENSLBEG00000026232	tumor necrosis factor receptor superfamily member 6B-like [Source:NCBI gene;Acc:109995681]	TNFRSF6B	TNFRSF6B	44.3788	1.40718	7.76619e-05	0.0479059
ENSLBEG00000005406	cholecystokinin receptor type A-like [Source:NCBI gene;Acc:109975609]	CCKAR	CCKAR	15.0018	1.40326	0.00834901	0.259427
ENSLBEG00000023029	suppressor of cytokine signaling 3 [Source:NCBI gene;Acc:109994403]	socs3a	SOCS3	218.342	1.40097	0.000107939	0.0513634
ENSLBEG00000002064	junctional adhesion molecule 2b [Source:ZFIN;Acc:ZDB-GENE-080229-3]	jam2b	VSIR	36.4516	1.40042	0.0034872	0.197401
ENSLBEG00000026996	inhibin beta B chain-like [Source:NCBI gene;Acc:109983493]	inhbb	INHBB	26.7294	1.36834	0.00694135	0.242084
ENSLBEG00000015615	matrix metallopeptidase 9 [Source:NCBI gene;Acc:109994784]	mmp9	MMP9	901.242	1.36742	0.00170285	0.160059
ENSLBEG00000005150	indoleamine 2,3-dioxygenase 2-like [Source:NCBI gene;Acc:110002288]	ido1	IDO2	27.1345	1.35789	0.00274085	0.18291
ENSLBEG00000001174	dapper homolog 3-like [Source:NCBI gene;Acc:110000371]	DACT3	DACT3	7.74092	1.35592	0.00509932	NA
ENSLBEG00000011033	interleukin-3 receptor class 2 subunit beta-like [Source:NCBI gene;Acc:109996985]	IL3RA	#N/A	71.1145	1.34942	0.00391728	0.2048
ENSLBEG00000017819	0	0		265.293	1.34069	0.00803991	0.255193
ENSLBEG00000015390	E3 ubiquitin-protein ligase TRIM39-like [Source:NCBI gene;Acc:109998602]	TRIM39	TRIM39	19.5678	1.32512	0.00137949	0.158949
ENSLBEG00000020351	neuromedin U [Source:NCBI gene;Acc:109991497]	NMU	NMU	28.699	1.32291	0.0015662	0.158949
ENSLBEG00000007042	epithelial membrane protein 2-like [Source:NCBI gene;Acc:109977624]	EMP2	EMP2	93.6419	1.32186	0.000796433	0.123802
ENSLBEG00000003502	TELO2-interacting protein 2-like [Source:NCBI gene;Acc:110004282]	TTI2	TTI2	23.11	1.30641	0.00332702	0.194692
ENSLBEG00000021098	RAS and EF-hand domain containing [Source:NCBI gene;Acc:110003128]	RASEF	RASEF	20.8271	1.30396	0.00256661	0.18291
ENSLBEG00000026644	keratin, type I cytoskeletal 18-like [Source:NCBI gene;Acc:109991643]	krt1-c5	KRT1-C5	24.7931	1.28738	0.00326869	0.193737
ENSLBEG00000020702	0	0	#N/A	117.948	1.28338	0.00129094	0.153576
ENSLBEG00000006112	lipoprotein lipase-like [Source:NCBI gene;Acc:109987784]	LPL	LPL	116.704	1.28234	0.00623959	0.234583
ENSLBEG00000009891	serpin family E member 1 [Source:NCBI gene;Acc:110001090]	serpine1	SERPINE1	84.471	1.2816	0.0028938	0.18522
ENSLBEG00000007859	0	0		9.11746	1.27633	0.00806055	NA
ENSLBEG00000005853	centriolar coiled-coil protein of 110 kDa-like [Source:NCBI gene;Acc:110003625]	CCP110	CCP110	10.8522	1.25892	0.00221703	0.175384
ENSLBEG00000004051	transmembrane gamma-carboxyglutamic acid protein 1-like [Source:NCBI gene;Acc:109987770]	prrg1	PRRG1	18.9144	1.25891	0.000150648	0.064853
ENSLBEG00000019489	0	TAC3	TAC3	71.2424	1.25797	0.000259042	0.0798952
ENSLBEG00000006877	solute carrier family 15 member 2-like [Source:NCBI gene;Acc:109996918]	slc15a2	SLC15A2	160.229	1.25374	0.00604088	0.231389
ENSLBEG00000003298	FH2 domain-containing protein 1-like [Source:NCBI gene;Acc:109984787]	fhdc4		24.6185	1.2508	0.00818786	0.256332
ENSLBEG00000002035	L-threonine 3-dehydrogenase, mitochondrial-like [Source:NCBI gene;Acc:109987723]	tdh	TDH	784.657	1.2485	0.00155794	0.158949
ENSLBEG00000007179	ovarian cancer G-protein coupled receptor 1-like [Source:NCBI gene;Acc:109989497]	GPR68	GPR68	62.0217	1.24648	0.00353155	0.197401
ENSLBEG00000014114	pleckstrin homology domain-containing family F member 2-like [Source:NCBI gene;Acc:109999446]	PLEKHF2	PLEKHF2	62.0774	1.22968	0.00528767	0.221059
ENSLBEG00000023867	sprouty RTK signaling antagonist 4 [Source:NCBI gene;Acc:110003332]	spry4	SPRY4	39.9652	1.22425	0.00198629	0.169075
ENSLBEG00000006102	programmed cell death 2 like [Source:NCBI gene;Acc:109984835]	pdcd2l	PDCD2L	14.0692	1.22152	0.0030722	0.189216
ENSLBEG00000020637	0	HMCN1	HMCN1	175.64	1.20088	0.000171587	0.064853
ENSLBEG00000002059	progestin and adipoQ receptor family member 6-like [Source:NCBI gene;Acc:109988832]	paqr6	PAQR6	49.9699	1.19503	0.00928315	0.265029
ENSLBEG00000013824	cysteine rich angiogenic inducer 61 [Source:NCBI gene;Acc:109983833]	cyr61	CYR61	232.119	1.19265	0.000258238	0.0798952
ENSLBEG00000011178	chemokine-like receptor 1 [Source:NCBI gene;Acc:109986664]	fpr1	FPR1	261.065	1.18503	0.00301716	0.189216
ENSLBEG00000017924	G protein-coupled receptor, class C, group 5, member C [Source:ZFIN;Acc:ZDB-GENE-070928-27]	gprc5c	GPRC5C	17.2537	1.18328	0.00598654	0.231336
ENSLBEG00000017269	0	0	#N/A	44.1671	1.1824	0.00121142	0.149453
ENSLBEG00000026459	carbohydrate (N-acetylglucosamine-6-O) sulfotransferase 2b [Source:ZFIN;Acc:ZDB-GENE-060720-33]	chst2b	CHST2	7.71716	1.18161	0.00779788	NA
ENSLBEG00000018912	insulin receptor substrate 2-like [Source:NCBI gene;Acc:110003847]	irs2b	IRS2	54.3492	1.18128	0.00310465	0.189584
ENSLBEG00000022838	tRNA methyltransferase 61B [Source:NCBI gene;Acc:109989737]	trmt61b	TRMT61B	20.0922	1.17384	0.00391445	0.2048
ENSLBEG00000018796	G protein-coupled receptor 143 [Source:NCBI gene;Acc:110002568]	gpr143	GPR143	11.9216	1.1652	0.00985879	0.272776
ENSLBEG00000024526	matrix metalloproteinase-17-like [Source:NCBI gene;Acc:109988608]	mmp25b	MMP25	265.335	1.15216	0.000180256	0.064853
ENSLBEG00000016942	mitochondrial rRNA methyltransferase 2 [Source:NCBI gene;Acc:109975163]	mrm2	MRM2	19.2528	1.15184	0.0016311	0.158949
ENSLBEG00000007567	EGF containing fibulin extracellular matrix protein 2 [Source:NCBI gene;Acc:109985468]	efemp2	EFEMP2	94.9153	1.15031	0.000184689	0.064853
ENSLBEG00000004139	purine nucleoside phosphorylase-like [Source:NCBI gene;Acc:109997475]	PNP	PNP	234.73	1.12967	0.00485235	0.216085
ENSLBEG00000021174	B2 bradykinin receptor-like [Source:NCBI gene;Acc:109982343]	BDKRB2	BDKRB2	40.8094	1.1265	0.00304343	0.189216
ENSLBEG00000004825	hydroxysteroid 17-beta dehydrogenase 14 [Source:NCBI gene;Acc:109998006]	hsd17b14	HSD17B14	124.168	1.11606	0.000417402	0.0939436
ENSLBEG00000017124	chordin [Source:NCBI gene;Acc:109986279]	chrd	CHRD	21.9548	1.11527	0.00575665	0.225911
ENSLBEG00000015722	0	0	#N/A	34.5009	1.11315	0.00187933	0.164738
ENSLBEG00000011663	metallothionein B [Source:NCBI gene;Acc:109987872]	mt2	MT3	7145.4	1.11255	0.00880026	0.263485
ENSLBEG00000015862	peroxisome proliferator-activated receptor gamma, coactivator-related 1 [Source:ZFIN;Acc:ZDB-GENE-030131-9858]	pprc1	PPRC1	37.4393	1.10613	0.00728856	0.248243
ENSLBEG00000021005	dihydropyrimidine dehydrogenase [Source:NCBI gene;Acc:109981208]	dpydb	DPYD	140.132	1.09501	0.00724382	0.247724
ENSLBEG00000002144	regulating synaptic membrane exocytosis 2 [Source:NCBI gene;Acc:109983559]	RIMS2	RIMS2	63.5696	1.09028	0.0071802	0.246668
ENSLBEG00000006262	protein-glutamine gamma-glutamyltransferase 2-like [Source:NCBI gene;Acc:109987163]	TGM2	TGM2	56.2952	1.08735	0.00222191	0.175384
ENSLBEG00000007258	0	0	#N/A	75.4338	1.08618	0.000542919	0.106321
ENSLBEG00000017288	ADAM metallopeptidase domain 23 [Source:NCBI gene;Acc:109984318]	ADAM23	ADAM23	19.536	1.07815	0.00183804	0.162724
ENSLBEG00000023927	SAM pointed domain-containing Ets transcription factor-like [Source:NCBI gene;Acc:109981800]	SPDEF	SPDEF	231.694	1.07346	0.00136055	0.158949
ENSLBEG00000009014	nuclear FMR1 interacting protein 1 [Source:NCBI gene;Acc:109998076]	NUFIP1	NUFIP1	39.0643	1.07164	0.000683846	0.119889
ENSLBEG00000016293	follistatin like 3 [Source:NCBI gene;Acc:109982761]	fstl3	FSTL3	139.774	1.07121	0.00882766	0.263485
ENSLBEG00000007075	C-type natriuretic peptide 1 [Source:NCBI gene;Acc:110000480]	NPPC	NPPC	76.5413	1.06597	0.000751609	0.123802
ENSLBEG00000023327	0	0	#N/A	17.2686	1.04614	0.00420063	0.210728
ENSLBEG00000007833	zinc finger DHHC-type containing 1 [Source:NCBI gene;Acc:110001057]	zdhhc1	ZDHHC1	12.4755	1.04225	0.00791407	0.255193
ENSLBEG00000010154	thioredoxin reductase 1, cytoplasmic-like [Source:NCBI gene;Acc:109994152]	txnrd3	TXNRD3	1834.59	1.02976	0.00153284	0.158949
ENSLBEG00000003724	intercellular adhesion molecule 1-like [Source:NCBI gene;Acc:109997714]	ICAM1	#N/A	59.6461	1.00983	0.0063455	0.23696
ENSLBEG00000025905	complement factor properdin [Source:NCBI gene;Acc:109989305]	CFP	CFP	168.739	1.00793	0.00221271	0.175384
ENSLBEG00000003615	0	0	#N/A	10.7911	0.986131	0.00879036	0.263485
ENSLBEG00000028014	6-pyruvoyltetrahydropterin synthase [Source:NCBI gene;Acc:109988596]	pts	PTS	16.8265	0.984348	0.00287601	0.18522
ENSLBEG00000012027	keratin, type I cytoskeletal 18-like [Source:NCBI gene;Acc:109981518]	krt18	KRT18	3133.09	0.980144	4.62948e-05	0.0443377
ENSLBEG00000016381	protein jagged-2-like [Source:NCBI gene;Acc:109988436]	jag2b	JAG2	32.6516	0.980078	0.00184659	0.162724
ENSLBEG00000001093	sodium/hydrogen exchanger 3-like [Source:NCBI gene;Acc:109976705]	SLC9A3	SLC9A3	83.7262	0.979095	0.0042295	0.210905
ENSLBEG00000021603	leukemia inhibitory factor receptor-like [Source:NCBI gene;Acc:109988512]	LIFR	LIFR	184.314	0.977638	0.00118921	0.148958
ENSLBEG00000000012	muscarinic acetylcholine receptor M1-like [Source:NCBI gene;Acc:109988683]	CHRM1	CHRM1	34.5363	0.976755	0.00594682	0.230336
ENSLBEG00000026635	gremlin 1b [Source:ZFIN;Acc:ZDB-GENE-090218-21]	grem1	GREM1	155.521	0.965859	0.00655063	0.238211
ENSLBEG00000013097	prepronociceptin [Source:NCBI gene;Acc:110004588]	pnoc	PNOC	55.5552	0.961005	0.00965302	0.270831
ENSLBEG00000001245	Krueppel-like factor 4 [Source:NCBI gene;Acc:109998538]	klf17	KLF17	151.528	0.946823	0.00900513	0.263689
ENSLBEG00000026890	angiomotin like 2 [Source:NCBI gene;Acc:109983476]	amotl2	AMOTL2	176.449	0.945203	0.00213314	0.174155
ENSLBEG00000003997	complement factor H-like [Source:NCBI gene;Acc:109986557]	CFHR1	CFHR1	16.307	0.93857	0.00547946	0.223559
ENSLBEG00000004763	apoptogenic 1, mitochondrial [Source:NCBI gene;Acc:109995828]	apopt1	APOPT1	23.4692	0.935089	0.000799174	0.123802
ENSLBEG00000009019	beta-1,3-N-acetylglucosaminyltransferase lunatic fringe-like [Source:NCBI gene;Acc:109991416]	LFNG	LFNG	33.1299	0.933471	0.00290258	0.18522
ENSLBEG00000014937	filamin A interacting protein 1 like [Source:NCBI gene;Acc:109990182]	FILIP1	FILIP1	238.725	0.932389	0.000365022	0.0921129
ENSLBEG00000019783	GRB2-associated-binding protein 1-like [Source:NCBI gene;Acc:110002599]	GAB1	GAB1	74.3376	0.932103	0.000790788	0.123802
ENSLBEG00000014865	sphingomyelin synthase 2 [Source:NCBI gene;Acc:109980526]	sgms2	SGMS2	23.4302	0.92538	0.00329104	0.19437
ENSLBEG00000012633	fructose-1,6-bisphosphatase 1-like [Source:NCBI gene;Acc:109997010]	FBP1	FBP1	508.451	0.916985	0.00408216	0.207915
ENSLBEG00000005323	serine/threonine-protein kinase tousled-like 2 [Source:NCBI gene;Acc:109983073]	tlk2	TLK2	144.974	0.914163	0.00151238	0.158949
ENSLBEG00000023624	glycine C-acetyltransferase [Source:NCBI gene;Acc:110003322]	gcat	GCAT	107.332	0.911586	0.00452278	0.214739
ENSLBEG00000003639	bifunctional 3'-phosphoadenosine 5'-phosphosulfate synthase 2-like [Source:NCBI gene;Acc:109981883]	papss2a	PAPSS2A	68.5158	0.903971	0.00810549	0.255193
ENSLBEG00000009992	IGF like family receptor 1 [Source:NCBI gene;Acc:109986597]	igflr1	IGFLR1	94.4285	0.89946	0.00205611	0.170371
ENSLBEG00000022298	hydrogen voltage gated channel 1 [Source:NCBI gene;Acc:110003952]	hvcn1	HVCN1	141.448	0.89691	0.00873055	0.262943
ENSLBEG00000014844	semaphorin-3aa-like [Source:NCBI gene;Acc:109998214]	sema3aa	SEMA4A	55.7078	0.894934	0.00904747	0.263689
ENSLBEG00000025379	dual specificity phosphatase 5 [Source:ZFIN;Acc:ZDB-GENE-010625-1]	dusp5	DUSP5	83.7798	0.893879	0.00118322	0.148958
ENSLBEG00000004664	leukotriene B4 receptor 1-like [Source:NCBI gene;Acc:109997472]	ltb4r2b	LTB4R2	43.0264	0.891875	0.00922139	0.264485
ENSLBEG00000005906	leukotriene B4 receptor 1-like [Source:NCBI gene;Acc:109996885]	ltb4r	LTB4R	55.0402	0.884554	0.00380341	0.2048
ENSLBEG00000006342	retinol binding protein 4 [Source:NCBI gene;Acc:109990572]	rbp4	RBP4	1438.71	0.883288	0.00558477	0.22407
ENSLBEG00000008492	lecithin-cholesterol acyltransferase [Source:NCBI gene;Acc:109991845]	lcat	LCAT	31.0693	0.881176	0.00310756	0.189584
ENSLBEG00000024610	mitochondrial ribosomal protein L12 [Source:NCBI gene;Acc:109989241]	mrpl12	MRPL12	91.5924	0.875061	0.00264622	0.18291
ENSLBEG00000018472	mucin-2-like [Source:NCBI gene;Acc:110003345]	MUC2	MUC2	50563.3	0.873159	5.13407e-05	0.0443377
ENSLBEG00000017198	metabotropic glutamate receptor 6-like [Source:NCBI gene;Acc:110002528]	GRM6	GRM6	87.6378	0.869574	0.00119266	0.148958
ENSLBEG00000001503	0	0	#N/A	34.1565	0.86259	0.00478226	0.215607
ENSLBEG00000004152	aminoadipate-semialdehyde synthase [Source:NCBI gene;Acc:109984853]	aass	AASS	53.7067	0.860942	0.0081039	0.255193
ENSLBEG00000027396	DNA-directed RNA polymerase I subunit RPA2-like [Source:NCBI gene;Acc:110003613]	polr1b	POLR1B	81.1037	0.858317	0.000430307	0.0948408
ENSLBEG00000025000	RAS guanyl releasing protein 3 [Source:NCBI gene;Acc:109994471]	rasgrp3	RASGRP3	29.0605	0.85825	0.00762154	0.252588
ENSLBEG00000016316	platelet endothelial aggregation receptor 1-like [Source:NCBI gene;Acc:109992016]	pear1	PEAR1	37.919	0.846425	0.00515867	0.221059
ENSLBEG00000017012	glutamate rich WD repeat containing 1 [Source:NCBI gene;Acc:109993713]	grwd1	GRWD1	136.385	0.841823	0.000882512	0.126709
ENSLBEG00000014300	proenkephalin [Source:NCBI gene;Acc:109996554]	penka	PENK	578.403	0.830188	0.000598475	0.110751
ENSLBEG00000022712	adenosylhomocysteinase [Source:NCBI gene;Acc:109998379]	ahcy	AHCY	1709.87	0.827047	0.00200547	0.169549
ENSLBEG00000017104	FAST kinase domains 1 [Source:NCBI gene;Acc:109997090]	fastkd1	FASTKD1	56.8111	0.82386	0.00288051	0.18522
ENSLBEG00000011697	regulator of cell cycle RGCC-like [Source:NCBI gene;Acc:109982632]	rgcc	RGCC	167.336	0.819581	0.00123241	0.150925
ENSLBEG00000009161	colony stimulating factor 3 receptor [Source:NCBI gene;Acc:109983684]	CSF3R	CSF3R	427.561	0.810071	0.00652827	0.238211
ENSLBEG00000005650	mitochondrial fission factor-like [Source:NCBI gene;Acc:109995254]	MFF	MFF	32.6151	0.802351	0.00432603	0.213166
ENSLBEG00000008923	UPF0577 protein KIAA1324-like [Source:NCBI gene;Acc:109993582]	si:dkey-153k10.9	KIAA1324L	36.3438	0.792937	0.00526412	0.221059
ENSLBEG00000012610	glutaminyl-peptide cyclotransferase [Source:NCBI gene;Acc:109992424]	qpct	QPCT	129.796	0.787303	0.00996596	0.273448
ENSLBEG00000024402	natriuretic peptide receptor 1 [Source:NCBI gene;Acc:109997242]	npr1a	NPR1	53.7048	0.784217	0.00162659	0.158949
ENSLBEG00000026314	tuftelin-like [Source:NCBI gene;Acc:109995023]	TUFT1	TUFT1	457.979	0.779931	0.0056082	0.22407
ENSLBEG00000013649	synaptotagmin-like protein 1 [Source:NCBI gene;Acc:109979228]	sytl1	SYTL1	50.8746	0.779591	0.000759253	0.123802
ENSLBEG00000023359	proteasome subunit beta 7 [Source:NCBI gene;Acc:109995596]	psmb7	PSMB7	312.655	0.774752	0.00415607	0.209759
ENSLBEG00000024776	SNF-related serine/threonine-protein kinase-like [Source:NCBI gene;Acc:109990890]	SNRK	SNRK	398.664	0.770343	0.00931814	0.265288
ENSLBEG00000022902	secretogranin-2-like [Source:NCBI gene;Acc:109984085]	scg2b	SCG2	47.5829	0.76912	0.0025622	0.18291
ENSLBEG00000024181	TGF-beta receptor type-2-like [Source:NCBI gene;Acc:110000840]	tgfbr2	TGFBR2	87.3245	0.765839	0.000358932	0.0921129
ENSLBEG00000022664	retinoid-binding protein 7-like [Source:NCBI gene;Acc:109980638]	rbp7b	RBP7	52.8896	0.765571	0.00436451	0.213797
ENSLBEG00000023517	pyrroline-5-carboxylate reductase 1, mitochondrial-like [Source:NCBI gene;Acc:109994715]	pycr1a	PYCR1	83.1005	0.764729	0.00324268	0.193592
ENSLBEG00000012012	5'-nucleotidase domain-containing protein 2-like [Source:NCBI gene;Acc:109986276]	nt5dc2	NT5DC2	97.2943	0.759159	0.00495127	0.217094
ENSLBEG00000021597	laminin subunit gamma-1-like [Source:NCBI gene;Acc:109992561]	lamc1	LAMC1	80.0335	0.753787	0.00493595	0.217094
ENSLBEG00000025837	membrane associated guanylate kinase, WW and PDZ domain containing 1 [Source:NCBI gene;Acc:109983426]	magi1b	MAGI1	32.7698	0.744904	0.00661912	0.240178
ENSLBEG00000025324	Tctex1 domain containing 2 [Source:NCBI gene;Acc:109987976]	tctex1d2	TCTEX1D2	29.6249	0.740623	0.00182788	0.162724
ENSLBEG00000010136	discoidin domain-containing receptor 2-like [Source:NCBI gene;Acc:109999952]	ddr2l	DDR2L	131.286	0.73896	0.000467721	0.0986061
ENSLBEG00000010193	ribulose-phosphate 3-epimerase-like [Source:NCBI gene;Acc:110004535]	rpe	RPE	183.736	0.732178	0.00233354	0.181613
ENSLBEG00000028058	core histone macro-H2A.2 [Source:NCBI gene;Acc:109977092]	h2afy2	H2AFY2	198.789	0.714849	0.00774727	0.253998
ENSLBEG00000023278	calcium activated nucleotidase 1 [Source:NCBI gene;Acc:109994243]	cant1a	CANT1	166.318	0.713177	0.00516848	0.221059
ENSLBEG00000026813	MAK16 homolog [Source:NCBI gene;Acc:109990962]	mak16	MAK16	118.995	0.710983	0.00338172	0.196078
ENSLBEG00000002356	scavenger receptor cysteine-rich type 1 protein M130-like [Source:NCBI gene;Acc:109987725]	CD163	CD163	1011.52	0.709136	0.00609753	0.231859
ENSLBEG00000004376	60S ribosomal protein L3 [Source:NCBI gene;Acc:109998013]	rpl3	RPL3	9937.4	0.708378	0.00566342	0.22407
ENSLBEG00000011959	von Willebrand factor-like [Source:NCBI gene;Acc:109991285]	vwf	VWF	280.12	0.705977	4.9531e-05	0.0443377
ENSLBEG00000009629	WD repeat-containing protein 18-like [Source:NCBI gene;Acc:109978095]	WDR18	WDR18	37.763	0.702803	0.00266187	0.18291
ENSLBEG00000018751	class E basic helix-loop-helix protein 40-like [Source:NCBI gene;Acc:109992505]	BHLHE40	BHLHE40	1458.15	0.69504	0.00806317	0.255193
ENSLBEG00000021013	muscarinic acetylcholine receptor M3-like [Source:NCBI gene;Acc:109987892]	chrm3	CHRM3	52.1324	0.694171	0.00435295	0.213797
ENSLBEG00000000693	DNA polymerase delta 3, accessory subunit [Source:NCBI gene;Acc:109989886]	pold3	POLD3	51.6215	0.687649	0.00530694	0.221059
ENSLBEG00000025558	ornithine aminotransferase [Source:NCBI gene;Acc:109992183]	oat	OAT	147.476	0.684929	0.00524139	0.221059
ENSLBEG00000019895	laminin subunit beta 3 [Source:NCBI gene;Acc:109994895]	LAMB3	LAMB3	589.401	0.683815	0.000388189	0.0936999
ENSLBEG00000020547	coiled-coil domain-containing protein 86-like [Source:NCBI gene;Acc:109994928]	CCDC86	CCDC86	193.069	0.6831	0.00893032	0.263689
ENSLBEG00000026281	DEAD-box helicase 56 [Source:NCBI gene;Acc:110001987]	ddx56	DDX56	67.7456	0.676369	0.00725845	0.247724
ENSLBEG00000005765	zinc finger protein 593 [Source:NCBI gene;Acc:109990547]	znf593	ZNF593	252.833	0.67071	0.00846724	0.261051
ENSLBEG00000006519	DNA polymerase epsilon 4, accessory subunit [Source:NCBI gene;Acc:109987782]	pole4	POLE4	39.0406	0.670384	0.00804263	0.255193
ENSLBEG00000015916	adenylate cyclase activating polypeptide 1 [Source:NCBI gene;Acc:109994291]	ADCYAP1	ADCYAP1	805.09	0.668573	0.00469706	0.214739
ENSLBEG00000015930	prodynorphin [Source:NCBI gene;Acc:109981550]	pdyn	PDYN	41.8607	0.668276	0.00280589	0.18291
ENSLBEG00000001251	kelch-like protein 4 [Source:NCBI gene;Acc:109986491]	klhl4	KLHL4	55.2251	0.663988	0.00281147	0.18291
ENSLBEG00000007455	pyruvate dehydrogenase (acetyl-transferring) kinase isozyme 2, mitochondrial-like [Source:NCBI gene;Acc:109991828]	pdk2b	PDK2	1415.58	0.663041	0.00534589	0.221317
ENSLBEG00000005380	ectoderm-neural cortex protein 1-like [Source:NCBI gene;Acc:109987774]	enc3	ENC3	807.272	0.661405	0.00935121	0.265344
ENSLBEG00000004381	VANGL planar cell polarity protein 2 [Source:NCBI gene;Acc:109997471]	VANGL2	VANGL2	89.3029	0.660893	0.00901062	0.263689
ENSLBEG00000026430	stabilin 1 [Source:NCBI gene;Acc:109981735]	stab1	STAB1	437.506	0.652258	0.00247333	0.18291
ENSLBEG00000024813	nudix hydrolase 9 [Source:NCBI gene;Acc:109998418]	nudt9	NUDT9	346.261	0.644756	0.000708749	0.122484
ENSLBEG00000011912	selenide, water dikinase 2-like [Source:NCBI gene;Acc:109999398]	sephs2	SEPHS2	327.563	0.634628	0.00960692	0.270733
ENSLBEG00000015861	cysteinyl leukotriene receptor 1 [Source:NCBI gene;Acc:109981086]	cysltr1	CYSLTR1	85.53	0.631514	0.0069176	0.242084
ENSLBEG00000010290	zinc finger protein Dzip1-like [Source:NCBI gene;Acc:109992387]	dzip1	DZIP1	57.1354	0.631036	0.00672955	0.240458
ENSLBEG00000019252	G protein subunit gamma 10 [Source:NCBI gene;Acc:109997131]	gng10	GNG10	65.7972	0.630069	0.0027007	0.18291
ENSLBEG00000002128	NHP2 ribonucleoprotein [Source:NCBI gene;Acc:109983580]	nhp2	NHP2	257.12	0.629067	0.000852348	0.123802
ENSLBEG00000026742	transducin beta like 3 [Source:NCBI gene;Acc:109985814]	tbl3	TBL3	107.749	0.625518	0.00276252	0.18291
ENSLBEG00000021824	ribosomal protein S6 [Source:NCBI gene;Acc:109991540]	rps6	RPS6	8944.6	0.616745	0.00471905	0.214739
ENSLBEG00000008675	0	0	#N/A	63.7586	0.615953	0.00340677	0.196078
ENSLBEG00000016535	SDA1 domain containing 1 [Source:NCBI gene;Acc:109996601]	sdad1	SDAD1	193.193	0.611349	0.00742615	0.249294
ENSLBEG00000026943	solute carrier organic anion transporter family member 2A1-like [Source:NCBI gene;Acc:109983227]	slco2a1	SLCO2A1	303.026	0.610571	0.00293574	0.186621
ENSLBEG00000012244	PR domain zinc finger protein 1-like [Source:NCBI gene;Acc:109999404]	prdm1a	PRDM1	107.273	0.608612	0.00541105	0.222093
ENSLBEG00000003018	breakpoint cluster region protein-like [Source:NCBI gene;Acc:109987111]	bcr	BCR	53.9756	0.608487	0.0043042	0.212997
ENSLBEG00000021940	anthrax toxin receptor 2-like [Source:NCBI gene;Acc:109986297]	antxr2	ANTXR2	84.2957	0.604129	0.00869454	0.262943
ENSLBEG00000012273	semaphorin-3F-like [Source:NCBI gene;Acc:109987078]	sema3g	SEMA3GA	62.3429	0.597747	0.00178051	0.160294
ENSLBEG00000016539	zinc finger HIT-type containing 3 [Source:NCBI gene;Acc:109996006]	znhit3	ZNHIT3	51.2252	0.59744	0.00392479	0.2048
ENSLBEG00000013573	mitochondrial translational initiation factor 2 [Source:NCBI gene;Acc:110005053]	mtif2	MTIF2	68.5796	0.596266	0.00271424	0.18291
ENSLBEG00000008879	SH3 domain containing 21 [Source:NCBI gene;Acc:109983710]	sh3d21	SH3D21	1366.15	0.595902	0.00288846	0.18522
ENSLBEG00000005361	SH2 domain-containing adapter protein E-like [Source:NCBI gene;Acc:109990038]	she	SHE	135.703	0.595528	0.00462467	0.214739
ENSLBEG00000025659	transmembrane protein 39A [Source:NCBI gene;Acc:109986999]	tmem39a	TMEM39A	137.669	0.592796	0.000313085	0.0899041
ENSLBEG00000019480	ATP-dependent RNA helicase DDX54-like [Source:NCBI gene;Acc:109981114]	ddx54	DDX54	359.977	0.592177	0.000194604	0.0661455
ENSLBEG00000001478	NOP9 nucleolar protein [Source:NCBI gene;Acc:109998533]	NOP9	NOP9	94.235	0.591498	0.00084607	0.123802
ENSLBEG00000027804	DEAD-box helicase 49 [Source:NCBI gene;Acc:110000163]	ddx49	DDX49	88.2141	0.590919	0.0067231	0.240458
ENSLBEG00000018538	KTI12 chromatin associated homolog [Source:NCBI gene;Acc:109982228]	kti12	KTI12	58.3675	0.586676	0.00977999	0.272384
ENSLBEG00000011898	0	0	#N/A	4204.17	0.581577	6.53414e-05	0.0454848
ENSLBEG00000018411	tsukushi, small leucine rich proteoglycan [Source:NCBI gene;Acc:109992092]	tsku	TSKU	835.188	0.580726	0.00274209	0.18291
ENSLBEG00000021017	ribosomal protein S3 [Source:NCBI gene;Acc:110001227]	rps3	RPS3	8959.97	0.578662	0.00196217	0.168453
ENSLBEG00000026455	ribosomal protein L13 [Source:NCBI gene;Acc:110005716]	rpl13	RPL13	4274.51	0.574367	0.00157613	0.158949
ENSLBEG00000010507	coiled-coil domain containing 125 [Source:NCBI gene;Acc:109982008]	CCDC125	CCDC125	365.676	0.571899	0.0068255	0.240458
ENSLBEG00000005509	Y-box binding protein 1 [Source:NCBI gene;Acc:109987143]	ybx1	YBX1	3481.28	0.570201	0.00808414	0.255193
ENSLBEG00000022133	U3 small nucleolar RNA-associated protein 14 homolog A-like [Source:NCBI gene;Acc:109985136]	si:dkey-251i10.3	UTP14C	168.195	0.570196	0.00116022	0.148958
ENSLBEG00000027636	melanophilin [Source:NCBI gene;Acc:109983448]	mlphb	MLPH	288.852	0.568723	0.00872833	0.262943
ENSLBEG00000022454	esterase D [Source:NCBI gene;Acc:109985137]	esd	ESD	854.613	0.566937	0.00674645	0.240458
ENSLBEG00000000109	chromosome unknown C11orf98 homolog [Source:NCBI gene;Acc:110000339]	C11orf98	C11ORF98	156.119	0.566201	0.00300331	0.189216
ENSLBEG00000028208	ribosome biogenesis protein BMS1 homolog [Source:NCBI gene;Acc:109989026]	bms1	BMS1	347.742	0.564409	0.00481571	0.215607
ENSLBEG00000017714	eukaryotic translation initiation factor 6 [Source:NCBI gene;Acc:109998278]	eif6	EIF6	172.705	0.563459	0.000822826	0.123802
ENSLBEG00000003891	nardilysin-like [Source:NCBI gene;Acc:109997977]	nrd1a	NRD1	61.022	0.563113	0.00451688	0.214739
ENSLBEG00000002407	Sec61 translocon beta subunit [Source:NCBI gene;Acc:109997421]	sec61b	SEC61B	410.614	0.56165	0.00204819	0.170371
ENSLBEG00000007755	SEC14-like protein 1 [Source:NCBI gene;Acc:109994113]	SEC14L1	SEC14L1	184.35	0.555322	0.00262215	0.18291
ENSLBEG00000007297	cytokine induced apoptosis inhibitor 1 [Source:NCBI gene;Acc:109998047]	ciapin1	CIAPIN1	438.204	0.550855	0.00174953	0.160177
ENSLBEG00000013549	ribosomal protein S28 [Source:NCBI gene;Acc:109991959]	rps28	RPS28	7450.68	0.550211	0.00378685	0.2048
ENSLBEG00000024708	syntaxin-2-like [Source:NCBI gene;Acc:109983340]	stx2b	STX2	60.3808	0.549379	0.00411396	0.208896
ENSLBEG00000002062	solute carrier family 12 member 8 [Source:NCBI gene;Acc:109985346]	slc12a8	SLC12A8	291.524	0.54913	0.000287196	0.0863067
ENSLBEG00000013233	N-acetyltransferase 10 [Source:NCBI gene;Acc:110004173]	nat10	NAT10	157.225	0.549126	0.00133884	0.158144
ENSLBEG00000021417	ribosomal RNA processing 1 [Source:HGNC Symbol;Acc:HGNC:18785]	RRP1	RRP1B	148.853	0.548299	0.0092423	0.264485
ENSLBEG00000005770	complement C1q binding protein [Source:NCBI gene;Acc:109996363]	c1qbp	C1QBP	288.525	0.541557	0.0084328	0.261051
ENSLBEG00000021388	ribosomal protein L36 [Source:NCBI gene;Acc:109993822]	rpl36	RPL36	9265.93	0.535736	0.00207037	0.170703
ENSLBEG00000000804	CGRP receptor component [Source:NCBI gene;Acc:109985249]	crcp	CRCP	56.7428	0.535641	0.00604641	0.231389
ENSLBEG00000019633	cysteinyl-tRNA synthetase [Source:NCBI gene;Acc:110000713]	cars	CARS	327.176	0.532268	0.00550819	0.223559
ENSLBEG00000025520	ribosomal protein L31 [Source:NCBI gene;Acc:109998966]	rpl31	RPL31	9332.98	0.519092	0.00158705	0.158949
ENSLBEG00000028293	ribosomal protein S20 [Source:NCBI gene;Acc:109992660]	RPS20	RPS20	15644.3	0.518118	0.00081341	0.123802
ENSLBEG00000027764	StAR related lipid transfer domain containing 10 [Source:NCBI gene;Acc:109989871]	stard10	STARD10	494.558	0.513849	0.00376995	0.2048
ENSLBEG00000012159	zinc finger protein Eos-like [Source:NCBI gene;Acc:109984943]	ikzf4	IKZF4	205.217	0.513251	0.00404475	0.207915
ENSLBEG00000022851	sodium-dependent phosphate transporter 1-B-like [Source:NCBI gene;Acc:109981226]	slc20a1b	SLC20A1	403.092	0.509607	0.00351937	0.197401
ENSLBEG00000019778	uncharacterized LOC109991474 [Source:NCBI gene;Acc:109991474]	paics	PAICS	351.15	0.504959	0.001587	0.158949
ENSLBEG00000001323	40S ribosomal protein S19 [Source:NCBI gene;Acc:109996314]	rps19	RPS19	7269.39	0.502433	0.00734376	0.249105
ENSLBEG00000015382	ribosomal protein lateral stalk subunit P0 [Source:NCBI gene;Acc:109983953]	rplp0	RPLP0	19291.4	0.501101	0.000290194	0.0863067
ENSLBEG00000019276	ribosomal protein L17 [Source:NCBI gene;Acc:109986291]	rpl17	RPL17	9797.53	0.500616	0.00219596	0.175384
ENSLBEG00000017315	fibrillarin [Source:NCBI gene;Acc:109999528]	fbl	FBL	2707.52	0.497353	0.00682897	0.240458
ENSLBEG00000002426	ribosomal protein S12 [Source:NCBI gene;Acc:109987673]	rps12	RPS12	8389.89	0.496748	0.00389267	0.2048
ENSLBEG00000026469	ribosomal protein lateral stalk subunit P1 [Source:NCBI gene;Acc:109984528]	rplp1	RPLP1	15444.4	0.495826	0.000549001	0.106321
ENSLBEG00000025101	ribosomal protein L6 [Source:NCBI gene;Acc:109991562]	rpl6	RPL6	5248.93	0.494483	0.00381713	0.2048
ENSLBEG00000000146	FCF1, rRNA-processing protein [Source:NCBI gene;Acc:109981361]	fcf1	FCF1	173.272	0.491366	0.000343242	0.0907411
ENSLBEG00000025534	phospholysine phosphohistidine inorganic pyrophosphate phosphatase [Source:NCBI gene;Acc:109992212]	lhpp	LHPP	128.484	0.491242	0.00429581	0.212997
ENSLBEG00000019122	dyskerin pseudouridine synthase 1 [Source:NCBI gene;Acc:109998838]	dkc1	DKC1	572.392	0.489394	0.00797485	0.255193
ENSLBEG00000017323	cytochrome b-c1 complex subunit 9 [Source:NCBI gene;Acc:109981238]	uqcr10	UQCR10	1208.79	0.483832	0.00774401	0.253998
ENSLBEG00000013737	calponin-2-like [Source:NCBI gene;Acc:109991995]	CNN2	CNN2	826.809	0.482912	0.00127886	0.153233
ENSLBEG00000016776	60S ribosomal protein L10-like [Source:NCBI gene;Acc:110003015]	rpl10	RPL10	10292.3	0.481598	0.00189219	0.164997
ENSLBEG00000023442	CCAAT enhancer binding protein zeta [Source:NCBI gene;Acc:110000249]	CEBPZ	CEBPZ	226.778	0.480984	0.00148858	0.158949
ENSLBEG00000015538	ribosomal protein L22 like 1 [Source:NCBI gene;Acc:109993138]	rpl22l1	RPL22L1	1311.77	0.480425	0.000850612	0.123802
ENSLBEG00000025962	RNA-binding motif, single-stranded-interacting protein 1-like [Source:NCBI gene;Acc:109987015]	rbms1a	RBMS1	318.323	0.479595	0.0015799	0.158949
ENSLBEG00000024457	POP1 homolog, ribonuclease P/MRP subunit [Source:NCBI gene;Acc:109987447]	POP1	POP1	160.962	0.475218	0.00860146	0.262376
ENSLBEG00000001496	ribosomal protein L24 [Source:NCBI gene;Acc:109995117]	rpl24	RPL24	8943.8	0.473544	0.000406991	0.0939436
ENSLBEG00000016350	elongation factor 1-delta-like [Source:NCBI gene;Acc:109984984]	eef1d	EEF1D	635.16	0.472357	0.00906667	0.263689
ENSLBEG00000023587	nucleolar protein 10 [Source:NCBI gene;Acc:109989720]	nol10	NOL10	139.814	0.469866	0.00901632	0.263689
ENSLBEG00000016873	inhibitor of DNA binding 1, HLH protein [Source:NCBI gene;Acc:109983917]	id1	ID1	254.19	0.468226	0.00442074	0.214657
ENSLBEG00000020888	DEAD-box helicase 24 [Source:NCBI gene;Acc:109992591]	ddx24	DDX24	226.594	0.467531	0.00739252	0.249294
ENSLBEG00000001977	chaperonin containing TCP1 subunit 4 [Source:NCBI gene;Acc:109988224]	cct4	CCT4	1556.29	0.464091	0.00696811	0.242084
ENSLBEG00000002111	ribosomal protein SA [Source:NCBI gene;Acc:110000384]	rpsa	RPSA	14253.6	0.459343	0.00575196	0.225911
ENSLBEG00000019263	activin receptor type-1B-like [Source:NCBI gene;Acc:109993736]	acvr1bb	ACVR1B	68.7791	0.458695	0.0062808	0.235071
ENSLBEG00000007650	deoxyhypusine hydroxylase [Source:NCBI gene;Acc:110001609]	dohh	DOHH	127.336	0.457441	0.0027701	0.18291
ENSLBEG00000011432	NOP53 ribosome biogenesis factor [Source:NCBI gene;Acc:109991896]	nop53	NOP53	669.157	0.457167	0.00993185	0.272962
ENSLBEG00000013623	0	0	#N/A	733.942	0.454596	0.00845284	0.261051
ENSLBEG00000019037	ribosomal protein S26 [Source:NCBI gene;Acc:109993763]	rps26	RPS26	11913.4	0.449498	0.00378832	0.2048
ENSLBEG00000000916	elongator acetyltransferase complex subunit 2 [Source:NCBI gene;Acc:109982386]	elp2	ELP2	95.0681	0.445269	0.0024233	0.1828
ENSLBEG00000026791	40S ribosomal protein S27 [Source:NCBI gene;Acc:109988669]	RPS27	RPS27	16620.1	0.444702	0.00342592	0.196078
ENSLBEG00000018355	nucleolar protein 16-like [Source:NCBI gene;Acc:110000692]	nop16	NOP16	224.604	0.439633	0.00880192	0.263485
ENSLBEG00000025359	eukaryotic translation initiation factor 3 subunit H [Source:NCBI gene;Acc:109997918]	eif3h	EIF3H	1996.8	0.438539	0.00258541	0.18291
ENSLBEG00000011557	solute carrier family 12 member 4 [Source:NCBI gene;Acc:109982687]	slc12a4	SLC12A4	189.572	0.435387	0.00636097	0.237007
ENSLBEG00000027676	ubiquitin A-52 residue ribosomal protein fusion product 1 [Source:NCBI gene;Acc:110000560]	uba52	UBA52	9734.67	0.432231	0.00276944	0.18291
ENSLBEG00000014734	aminoacyl tRNA synthetase complex interacting multifunctional protein 1 [Source:NCBI gene;Acc:109980549]	aimp1	AIMP1	546.144	0.426147	0.00763106	0.252588
ENSLBEG00000022471	ribosomal protein S18 [Source:NCBI gene;Acc:110000220]	rps18	RPS18	16792.5	0.425749	2.56244e-05	0.0355646
ENSLBEG00000022009	ribosomal protein S16 [Source:NCBI gene;Acc:109994398]	rps16	RPS16	5964.47	0.424608	0.0036407	0.201448
ENSLBEG00000005289	plasminogen activator inhibitor 1 RNA-binding protein-like [Source:NCBI gene;Acc:109998599]	serbp1a	SERBP1	2154.98	0.42449	0.00085236	0.123802
ENSLBEG00000027893	60S ribosomal protein L5-A [Source:NCBI gene;Acc:109982358]	RPL5	RPL5	12520.7	0.41899	0.00166705	0.158949
ENSLBEG00000007356	serine/arginine-rich splicing factor 6-like [Source:NCBI gene;Acc:109987166]	srsf6a	SRSF6	627.089	0.418231	0.0030479	0.189216
ENSLBEG00000002674	60S acidic ribosomal protein P2-like [Source:NCBI gene;Acc:109982984]	rplp2l	RPLP2	6046.35	0.418119	0.000181727	0.064853
ENSLBEG00000026724	solute carrier family 26 member 5 [Source:NCBI gene;Acc:109993966]	slc26a5	SLC26A5	114.31	0.416744	0.00386156	0.2048
ENSLBEG00000024800	ribosomal protein L14 [Source:NCBI gene;Acc:109990901]	rpl14	RPL14	10484.7	0.416574	0.00553025	0.223559
ENSLBEG00000017677	ribosomal protein L21 [Source:NCBI gene;Acc:109992976]	rpl21	RPL21	15886.1	0.4161	0.00325064	0.193592
ENSLBEG00000025339	ribosomal protein L18 [Source:NCBI gene;Acc:109986437]	rpl18	RPL18	17664.7	0.412639	0.00332981	0.194692
ENSLBEG00000015475	ribosomal protein L23a [Source:NCBI gene;Acc:109998213]	rpl23a	RPL23A	14620.5	0.4097	0.0060414	0.231389
ENSLBEG00000015490	ribosomal protein L4 [Source:NCBI gene;Acc:109982195]	rpl4	RPL4	15624	0.408253	0.00936788	0.265344
ENSLBEG00000020641	transmembrane protein 43 [Source:NCBI gene;Acc:109990296]	TMEM43	TMEM43	196.332	0.405824	0.00484711	0.216085
ENSLBEG00000023459	integrin subunit beta 4 [Source:NCBI gene;Acc:109988573]	itgb4	ITGB4	813.086	0.404696	0.00341628	0.196078
ENSLBEG00000004282	ribosomal protein L37a [Source:NCBI gene;Acc:109996304]	RPL37A	RPL37	13166.1	0.402803	6.8275e-05	0.0454848
ENSLBEG00000026810	ribosome production factor 1 homolog [Source:NCBI gene;Acc:109995066]	rpf1	RPF1	247.622	0.402242	0.00654925	0.238211
ENSLBEG00000005257	regulatory factor X1 [Source:NCBI gene;Acc:110000444]	RFX1	RFX1	284.228	0.395588	0.00627613	0.235071
ENSLBEG00000028687	ribosomal protein L39 [Source:NCBI gene;Acc:109992722]	rpl39	RPL39	15509.6	0.393255	0.00494108	0.217094
ENSLBEG00000019411	ribosomal protein S3A [Source:NCBI gene;Acc:109979924]	rps3a	RPS3A	14699.5	0.392263	0.00550871	0.223559
ENSLBEG00000027250	aminoacyl tRNA synthetase complex interacting multifunctional protein 2 [Source:NCBI gene;Acc:109985808]	aimp2	AIMP2	489.177	0.39136	0.00238387	0.182125
ENSLBEG00000003582	ribosomal protein S13 [Source:NCBI gene;Acc:109986031]	rps13	RPS13	7435.88	0.38587	0.00936647	0.265344
ENSLBEG00000007713	R-spondin 3 [Source:NCBI gene;Acc:109984559]	rspo3	RSPO3	323.665	0.385684	0.00920405	0.264485
ENSLBEG00000022531	60S ribosomal protein L26 [Source:NCBI gene;Acc:109994452]	rpl26	RPL26	12268	0.368824	0.00474476	0.214739
ENSLBEG00000023436	ribosomal protein S11 [Source:NCBI gene;Acc:109997859]	rps11	RPS11	12578.3	0.368019	0.0090302	0.263689
ENSLBEG00000015301	ribosomal protein L22 [Source:NCBI gene;Acc:109981494]	rpl22	RPL22	4398.01	0.366608	0.00152941	0.158949
ENSLBEG00000016213	ribosomal protein L29 [Source:NCBI gene;Acc:109986202]	rpl29	RPL29	6966.24	0.35862	0.00751837	0.250939
ENSLBEG00000027283	ribosomal protein S15a [Source:NCBI gene;Acc:109998444]	rps15a	RPS15A	11887.8	0.357878	0.00676458	0.240458
ENSLBEG00000026807	ribosomal protein S23 [Source:ZFIN;Acc:ZDB-GENE-080220-50]	rps23	RPS23	10332.3	0.350963	0.00766862	0.252912
ENSLBEG00000019945	synaptophysin-like 2b [Source:ZFIN;Acc:ZDB-GENE-050417-309]	sypl2b	SYPL2	487.28	0.341666	0.00353201	0.197401
ENSLBEG00000005434	60S ribosomal protein L13a-like [Source:NCBI gene;Acc:109990545]	rpl13a	RPL13A	13549.9	0.340901	0.00513625	0.221059
ENSLBEG00000010017	eukaryotic translation initiation factor 3 subunit I [Source:NCBI gene;Acc:109989018]	eif3i	EIF3I	2095.66	0.32907	0.00802787	0.255193
ENSLBEG00000027693	ribosomal protein L38 [Source:ZFIN;Acc:ZDB-GENE-030131-8752]	rpl38	RPL38	8028.25	0.317751	0.00782648	0.255088
ENSLBEG00000023617	PAT1 homolog 1, processing body mRNA decay factor [Source:NCBI gene;Acc:110001300]	patl1	PATL1	474.277	0.308648	0.0048009	0.215607
ENSLBEG00000000923	fragile X mental retardation syndrome-related protein 1-like [Source:NCBI gene;Acc:109992828]	fxr2	FXR2	334.706	0.279945	0.00743917	0.249294
ENSLBEG00000018465	transcription factor BTF3 homolog 4 [Source:NCBI gene;Acc:109996072]	btf3l4	BTF3L4	659.904	0.277292	0.0058568	0.227378
ENSLBEG00000020459	syntenin-1-like [Source:NCBI gene;Acc:109985097]	sdcbp2	SDCBP	1168.36	0.259233	0.00806272	0.255193
ENSLBEG00000004023	Rho guanine nucleotide exchange factor 1 [Source:NCBI gene;Acc:109996315]	arhgef1	ARHGEF1	633.51	-0.197942	0.00974208	0.272239
ENSLBEG00000005080	lysine demethylase 3B [Source:NCBI gene;Acc:109993527]	kdm3b	KDM3B	1232.23	-0.213971	0.00563924	0.22407
ENSLBEG00000012077	chromodomain helicase DNA binding protein 9 [Source:NCBI gene;Acc:109988751]	chd9	CHD9	2386.39	-0.222968	0.00218779	0.175384
ENSLBEG00000005139	transcriptional repressor CTCF-like [Source:NCBI gene;Acc:109989598]	ctcf	CTCF	1696.51	-0.222992	0.00470151	0.214739
ENSLBEG00000005283	family with sequence similarity 192 member A [Source:NCBI gene;Acc:109988901]	fam192a	FAM192A	290.091	-0.240516	0.00269995	0.18291
ENSLBEG00000004848	dynamin-1-like protein [Source:NCBI gene;Acc:110002037]	DNM1L	DNM1L	811.698	-0.250549	0.00920248	0.264485
ENSLBEG00000000455	LSM14A, mRNA processing body assembly factor [Source:NCBI gene;Acc:109995538]	lsm14ab	LSM14A	1269.22	-0.274792	0.00566178	0.22407
ENSLBEG00000019527	WAPL cohesin release factor [Source:NCBI gene;Acc:109990820]	wapla	WAPL	628.974	-0.27575	0.0036952	0.202446
ENSLBEG00000022654	PERP, TP53 apoptosis effector [Source:NCBI gene;Acc:109996220]	perp	PERP	4533.83	-0.28335	0.00920995	0.264485
ENSLBEG00000017778	AF4/FMR2 family member 4 [Source:NCBI gene;Acc:109987289]	aff4	AFF4	1388.84	-0.284259	0.00824558	0.257172
ENSLBEG00000012007	potassium two pore domain channel subfamily K member 1 [Source:NCBI gene;Acc:109983206]	kcnk1b	KCNK1	1266.1	-0.284617	0.00448989	0.214739
ENSLBEG00000021896	transcriptional repressor protein YY1-like [Source:NCBI gene;Acc:109996158]	YY1	YY1	510.888	-0.292052	0.00472231	0.214739
ENSLBEG00000018540	toll interacting protein [Source:NCBI gene;Acc:109989614]	tollip	TOLLIP	1020.8	-0.292598	0.00668471	0.240458
ENSLBEG00000024569	neurobeachin like 2 [Source:NCBI gene;Acc:109994964]	nbeal2	NBEAL2	1279.61	-0.29912	0.0024366	0.1828
ENSLBEG00000003858	zinc finger Y-chromosomal protein 1-like [Source:NCBI gene;Acc:109983560]	sfy	SFY	765.257	-0.310818	0.00117137	0.148958
ENSLBEG00000012455	zinc finger protein 512B [Source:NCBI gene;Acc:109980920]	si:dkey-256k13.2	ZNF512B	872.821	-0.31419	0.00529342	0.221059
ENSLBEG00000001979	vesicle-associated membrane protein 5-like [Source:NCBI gene;Acc:109985937]	vamp5	VAMP5	527.365	-0.318319	0.00916367	0.264485
ENSLBEG00000009202	serine/threonine kinase 10 [Source:NCBI gene;Acc:109987838]	SLK	SLK	974.777	-0.322836	0.00313912	0.19081
ENSLBEG00000022868	guanine nucleotide-binding protein G(I)/G(S)/G(T) subunit beta-1 [Source:NCBI gene;Acc:109980570]	GNB1	GNB1	1695.59	-0.322876	0.00389843	0.2048
ENSLBEG00000005634	guanine nucleotide-binding protein subunit alpha-11-like [Source:NCBI gene;Acc:109987747]	gna15	GNA15	1887.16	-0.326207	0.00761809	0.252588
ENSLBEG00000009896	uncharacterized LOC109994154 [Source:NCBI gene;Acc:109994154]	0	#N/A	227.286	-0.327403	0.00985423	0.272776
ENSLBEG00000009088	RAN binding protein 10 [Source:NCBI gene;Acc:109991849]	ranbp10	RANBP10	638.725	-0.328492	0.00142341	0.158949
ENSLBEG00000018512	nuclear factor kappa B subunit 1 [Source:NCBI gene;Acc:109987329]	nfkb1	NFKB1	801.74	-0.328652	0.00260577	0.18291
ENSLBEG00000017950	zinc fingers and homeoboxes protein 3-like [Source:NCBI gene;Acc:109983941]	ZHX3	ZHX3	597.356	-0.330643	0.00239907	0.18245
ENSLBEG00000004715	cysteine-rich hydrophobic domain-containing protein 2 [Source:NCBI gene;Acc:109989967]	chic2	CHIC2	690.574	-0.334633	0.00672965	0.240458
ENSLBEG00000005210	DAZ-associated protein 2-like [Source:NCBI gene;Acc:110004332]	dazap2	DAZAP2	1808.52	-0.339135	0.00706894	0.244767
ENSLBEG00000012271	transmembrane protein 135 [Source:NCBI gene;Acc:109988403]	tmem135	TMEM135	1279.25	-0.34162	0.00393492	0.2048
ENSLBEG00000019915	sortilin-like [Source:NCBI gene;Acc:109982819]	sort1b	SORT1	2236.35	-0.342605	0.00519608	0.221059
ENSLBEG00000008436	RNA binding motif protein 47 [Source:NCBI gene;Acc:109994141]	rbm47	RBM47	12572.3	-0.3431	0.00460553	0.214739
ENSLBEG00000007835	M-phase phosphoprotein 9 [Source:NCBI gene;Acc:110000492]	MPHOSPH9	MPHOSPH9	222.645	-0.34527	0.00697691	0.242084
ENSLBEG00000026550	exocyst complex component 6 [Source:NCBI gene;Acc:109987352]	exoc6	EXOC6	391.649	-0.346645	0.00179125	0.160394
ENSLBEG00000007911	transcription factor 25 [Source:NCBI gene;Acc:109983815]	tcf25	TCF25	576.561	-0.34835	0.00116601	0.148958
ENSLBEG00000017344	TCF3 fusion partner [Source:NCBI gene;Acc:109993718]	tfpt	TFPT	219.246	-0.349319	0.00949524	0.268494
ENSLBEG00000000789	WT1 interacting protein [Source:NCBI gene;Acc:109988399]	wtip	WTIP	409.109	-0.355164	0.00561147	0.22407
ENSLBEG00000028536	protein phosphatase 1 regulatory subunit 14A-like [Source:NCBI gene;Acc:109980786]	PPP1R14A	PPP1R14A	576.902	-0.35565	0.000244817	0.078412
ENSLBEG00000005363	nudix hydrolase 19 [Source:NCBI gene;Acc:109994262]	nudt19	NUDT19	232.114	-0.359045	0.00891863	0.263689
ENSLBEG00000021767	casein kinase I-like [Source:NCBI gene;Acc:109997197]	0	#N/A	1512.37	-0.361643	0.00905559	0.263689
ENSLBEG00000024723	acireductone dioxygenase 1 [Source:NCBI gene;Acc:110000292]	adi1	ADI1	202.538	-0.364549	0.00514539	0.221059
ENSLBEG00000014479	tyrosine-protein phosphatase non-receptor type 11-like [Source:NCBI gene;Acc:109985568]	ptpn11b	PTPN11	181.84	-0.367568	0.0099087	0.272776
ENSLBEG00000018372	zinc finger protein 827 [Source:NCBI gene;Acc:109980428]	znf827	ZNF827	889.94	-0.367785	0.004509	0.214739
ENSLBEG00000010510	MAP7 domain containing 3 [Source:NCBI gene;Acc:109985411]	map7d3	MAP7D3	776.335	-0.373223	0.00280373	0.18291
ENSLBEG00000012228	RAS p21 protein activator 3 [Source:NCBI gene;Acc:109985527]	rasa3	RASA3	149.795	-0.373941	0.00812167	0.25522
ENSLBEG00000018314	zinc finger and BTB domain containing 10 [Source:NCBI gene;Acc:109997760]	zbtb10	ZBTB10	1131.35	-0.374131	0.00143788	0.158949
ENSLBEG00000008532	uncharacterized protein KIAA1671 homolog [Source:NCBI gene;Acc:109982028]	0	#N/A	2161.16	-0.378024	0.00718306	0.246668
ENSLBEG00000019010	3-ketodihydrosphingosine reductase [Source:NCBI gene;Acc:109986484]	kdsr	KDSR	129.31	-0.379385	0.00780739	0.254965
ENSLBEG00000020147	phosphatidate phosphatase LPIN2-like [Source:NCBI gene;Acc:109993801]	LPIN2	LPIN2	684.287	-0.382487	0.00223793	0.175815
ENSLBEG00000028442	ubiquitin carboxyl-terminal hydrolase 15-like [Source:NCBI gene;Acc:109988113]	USP15	USP15	1063.67	-0.386763	0.000612398	0.110956
ENSLBEG00000022676	natural resistance-associated macrophage protein 2-like [Source:NCBI gene;Acc:109990293]	SLC11A2	SLC11A2	1452.2	-0.386966	0.00172628	0.160177
ENSLBEG00000024150	ankyrin repeat domain 50 [Source:NCBI gene;Acc:109999673]	ANKRD50	ANKRD50	276.871	-0.394047	0.00921407	0.264485
ENSLBEG00000017956	inositol polyphosphate-4-phosphatase type II B [Source:ZFIN;Acc:ZDB-GENE-090312-97]	inpp4b	INPP4B	292.394	-0.394502	0.0052718	0.221059
ENSLBEG00000019178	karyopherin subunit alpha 3 [Source:NCBI gene;Acc:109994885]	kpna3	KPNA3	705.203	-0.396425	0.0067881	0.240458
ENSLBEG00000003167	family with sequence similarity 83 member H [Source:NCBI gene;Acc:109982447]	fam83h	FAM83H	1481.05	-0.398247	0.00716307	0.246668
ENSLBEG00000001156	sulfotransferase family 6B member 1 [Source:NCBI gene;Acc:109976048]	sult6b1	SULT6B1	1367.22	-0.403747	0.0065192	0.238211
ENSLBEG00000018615	anoctamin-9-like [Source:NCBI gene;Acc:109989629]	ano9	ANO9	2066.74	-0.404638	0.00108587	0.146837
ENSLBEG00000027595	matrix metallopeptidase 28 [Source:NCBI gene;Acc:109989859]	mmp28	MMP28	274.541	-0.405186	0.00453318	0.214739
ENSLBEG00000017536	serine/threonine-protein kinase 24-like [Source:NCBI gene;Acc:109984347]	STK24	STK24	314.548	-0.406433	0.00653161	0.238211
ENSLBEG00000023410	immunoglobulin superfamily member 3-like [Source:NCBI gene;Acc:110003314]	IGSF3	IGSF3	1347.33	-0.407213	0.00078424	0.123802
ENSLBEG00000005745	RING finger protein 148-like [Source:NCBI gene;Acc:109989453]	RNF148	RNF148	7828.67	-0.410938	0.00742431	0.249294
ENSLBEG00000016092	0	0	#N/A	335.4	-0.411291	0.00168099	0.159073
ENSLBEG00000028240	sorting nexin-16-like [Source:NCBI gene;Acc:109992667]	snx16	SNX16	435.878	-0.413609	0.00175854	0.160177
ENSLBEG00000005465	uncharacterized LOC109990008 [Source:NCBI gene;Acc:109990008]	0	#N/A	376.585	-0.416265	0.00541397	0.222093
ENSLBEG00000009221	ATPase phospholipid transporting 11C [Source:NCBI gene;Acc:109985398]	atp11c	ATP11C	1027.8	-0.416989	0.0088775	0.263556
ENSLBEG00000015492	paxillin [Source:NCBI gene;Acc:109983915]	pxna	PXN	826.985	-0.417166	0.000854834	0.123802
ENSLBEG00000012437	transmembrane protease serine 2-like [Source:NCBI gene;Acc:109982097]	tmprss2	TMPRSS2	3889.85	-0.427248	0.00499044	0.218152
ENSLBEG00000027691	ras-related protein Rab-17-like [Source:NCBI gene;Acc:109983496]	RAB17	RAB17	216.837	-0.428086	0.0086684	0.262943
ENSLBEG00000021522	collagen type IV alpha 3 binding protein [Source:NCBI gene;Acc:109996678]	COL4A3BP	COL4A3BP	2251.9	-0.43057	0.00473147	0.214739
ENSLBEG00000025614	zinc transporter ZIP10-like [Source:NCBI gene;Acc:109992234]	slc39a10	SLC39A10	1878.12	-0.431486	0.00851451	0.261051
ENSLBEG00000003946	actin filament associated protein 1 like 2 [Source:NCBI gene;Acc:109996870]	afap1l2	AFAP1L2	742.424	-0.433882	0.00798513	0.255193
ENSLBEG00000027829	inositol polyphosphate phosphatase like 1 [Source:NCBI gene;Acc:109989857]	inppl1a	INPPL1	211.369	-0.437267	0.0020177	0.169721
ENSLBEG00000021659	echinoderm microtubule associated protein like 1 [Source:NCBI gene;Acc:109996163]	eml1	EML1	1759.83	-0.441714	0.00654906	0.238211
ENSLBEG00000009506	monocyte chemotactic protein 1B-like [Source:NCBI gene;Acc:109990085]	CCL11	CCL11	1716.73	-0.448931	0.00824072	0.257172
ENSLBEG00000000050	glucosylceramidase beta 2 [Source:NCBI gene;Acc:109988750]	gba2	GBA2	997.823	-0.451528	0.00605739	0.231389
ENSLBEG00000025486	chloride intracellular channel protein 5-like [Source:NCBI gene;Acc:109997307]	CLIC5	CLIC5	7839.72	-0.453421	0.00796178	0.255193
ENSLBEG00000021343	ephrin B2 [Source:NCBI gene;Acc:109985174]	efnb2	EFNB2	160.626	-0.455039	0.00362889	0.201448
ENSLBEG00000025426	alpha-1,6-mannosylglycoprotein 6-beta-N-acetylglucosaminyltransferase A-like [Source:NCBI gene;Acc:109997305]	mgat5	MGAT5	1788.04	-0.457483	0.000179972	0.064853
ENSLBEG00000026928	casein kinase 1 gamma 2 [Source:NCBI gene;Acc:110000436]	csnk1g2	CSNK1G2	1014.58	-0.458108	0.000103327	0.0506149
ENSLBEG00000025516	cytohesin-3 [Source:NCBI gene;Acc:109985878]	CYTH3	CYTH3	170.706	-0.463137	0.00523709	0.221059
ENSLBEG00000010737	chromosome unknown C1orf123 homolog [Source:NCBI gene;Acc:109997026]	si:ch211-284b7.3	CZIB	347.725	-0.464141	0.000380615	0.0936999
ENSLBEG00000026246	Rho GTPase activating protein 35 [Source:NCBI gene;Acc:109988044]	ARHGAP35	ARHGAP35	498.742	-0.472837	0.00913412	0.264485
ENSLBEG00000007926	probable phospholipid-transporting ATPase VD [Source:NCBI gene;Acc:109989475]	atp10d	ATP10D	778.859	-0.473519	0.00430981	0.212997
ENSLBEG00000028696	lysosomal associated membrane protein 2 [Source:NCBI gene;Acc:109992718]	lamp2	LAMP2	2482.26	-0.475219	0.00882632	0.263485
ENSLBEG00000022662	E3 ubiquitin-protein ligase CHIP-like [Source:NCBI gene;Acc:109993846]	STUB1	STUB1	307.784	-0.478364	0.000612904	0.110956
ENSLBEG00000024852	plakophilin-1-like [Source:NCBI gene;Acc:109981744]	pkp1b	PKP1B	2151.22	-0.479498	0.0076436	0.252588
ENSLBEG00000027089	LLGL2, scribble cell polarity complex component [Source:NCBI gene;Acc:109988469]	llgl2	LLGL2	1894.25	-0.479841	0.00316126	0.191457
ENSLBEG00000006639	semaphorin-4B-like [Source:NCBI gene;Acc:109999299]	sema4ba	SEMA4B	319.491	-0.482276	0.00333156	0.194692
ENSLBEG00000010254	inositol hexakisphosphate kinase 2 [Source:NCBI gene;Acc:109990120]	ip6k2b	IP6K2	1180.38	-0.49251	0.00617756	0.233304
ENSLBEG00000022100	transient receptor potential cation channel subfamily M member 6-like [Source:NCBI gene;Acc:109983333]	trpm6	TRPM6	711.628	-0.493129	0.00524043	0.221059
ENSLBEG00000022402	nucleus accumbens-associated protein 1-like [Source:NCBI gene;Acc:110002649]	nacc1	#N/A	208.397	-0.497867	0.00492233	0.217094
ENSLBEG00000007365	signal peptide peptidase like 2A [Source:NCBI gene;Acc:109983472]	SPPL2A	#N/A	7563.44	-0.49871	0.00678389	0.240458
ENSLBEG00000003308	trans-Golgi network integral membrane protein 1-like [Source:NCBI gene;Acc:109977485]	TGOLN1	TGOLN1	2325.45	-0.498943	0.00243145	0.1828
ENSLBEG00000008633	FYVE, RhoGEF and PH domain-containing protein 6-like [Source:NCBI gene;Acc:109993592]	FGD6	FGD6	289.667	-0.501238	0.00119846	0.148958
ENSLBEG00000016104	semaphorin-7A-like [Source:NCBI gene;Acc:110003002]	SEMA7A	SEMA7A	147.365	-0.505962	0.00445929	0.214739
ENSLBEG00000025367	tripartite motif-containing protein 66-like [Source:NCBI gene;Acc:110001963]	trim66	TRIM66	158.676	-0.5083	0.00398788	0.206268
ENSLBEG00000011082	ephrin A5 [Source:NCBI gene;Acc:110001666]	EFNA5	EFNA5	758.026	-0.508796	0.00166179	0.158949
ENSLBEG00000012743	nucleus accumbens-associated protein 1-like [Source:NCBI gene;Acc:109991748]	nacc1b	NACC1	300.703	-0.510452	0.00177773	0.160294
ENSLBEG00000012817	dual specificity tyrosine-phosphorylation-regulated kinase 2-like [Source:NCBI gene;Acc:109984240]	dyrk3	DYRK3	1693.08	-0.512005	0.00537916	0.221757
ENSLBEG00000023103	protein tyrosine phosphatase type IVA 3 [Source:NCBI gene;Acc:110000241]	PTP4A3	PTP4A3	208.411	-0.513709	0.00745952	0.249475
ENSLBEG00000010262	peroxisomal acyl-coenzyme A oxidase 1-like [Source:NCBI gene;Acc:110001108]	acox1	ACOX1	7041.83	-0.513995	0.000533078	0.105695
ENSLBEG00000017227	PH domain leucine-rich repeat-containing protein phosphatase 1-like [Source:NCBI gene;Acc:109985337]	phlpp1	PHLPP1	647.588	-0.5149	4.26044e-05	0.0443377
ENSLBEG00000013638	ADP-ribosylation factor-like 4aa [Source:ZFIN;Acc:ZDB-GENE-040426-1878]	arl4a	ARL4A	314.366	-0.516521	3.19696e-05	0.0380325
ENSLBEG00000001697	cytoplasmic polyadenylation element-binding protein 4-like [Source:NCBI gene;Acc:109996813]	CPEB4	CPEB4	2183.69	-0.516906	0.000172265	0.064853
ENSLBEG00000001797	disheveled-associated activator of morphogenesis 2-like [Source:NCBI gene;Acc:109994606]	daam2	DAAM2	106.69	-0.518973	0.00152724	0.158949
ENSLBEG00000022890	0	0	#N/A	62.9592	-0.521799	0.00907198	0.263689
ENSLBEG00000021105	nuclear factor 1 X-type-like [Source:NCBI gene;Acc:109994379]	NFIX	NFIX	1451.25	-0.522247	0.00262547	0.18291
ENSLBEG00000008561	intersectin-2-like [Source:NCBI gene;Acc:109990056]	itsn2a	ITSN2	1960.39	-0.52478	0.00220913	0.175384
ENSLBEG00000013620	SKI like proto-oncogene [Source:NCBI gene;Acc:109984992]	skila	SKIL	166.638	-0.532453	0.00250096	0.18291
ENSLBEG00000002833	ATP binding cassette subfamily A member 2 [Source:NCBI gene;Acc:109989409]	abca2	ABCA2	854.421	-0.533716	0.0040006	0.206285
ENSLBEG00000020457	FIG4 phosphoinositide 5-phosphatase [Source:NCBI gene;Acc:109983258]	FIG4	FIG4	270.06	-0.537967	0.000476707	0.0992445
ENSLBEG00000008179	cAMP-specific 3',5'-cyclic phosphodiesterase 4C-like [Source:NCBI gene;Acc:109991824]	pde4a	PDE4A	184.242	-0.540101	0.00963942	0.270831
ENSLBEG00000001960	tyrosine-protein kinase Blk-like [Source:NCBI gene;Acc:109987710]	blk	BLK	312.876	-0.542477	0.00446746	0.214739
ENSLBEG00000028813	circadian locomoter output cycles protein kaput-like [Source:NCBI gene;Acc:109992789]	CLOCK	CLOCK	271.447	-0.542665	0.00697498	0.242084
ENSLBEG00000025210	myocardial zonula adherens protein-like [Source:NCBI gene;Acc:109975191]	myzap	GCOM1	426.913	-0.546287	0.00140383	0.158949
ENSLBEG00000021813	endo-beta-N-acetylglucosaminidase [Source:NCBI gene;Acc:109997213]	engase	ENGASE	450.857	-0.549839	0.00209353	0.171763
ENSLBEG00000022450	serine/threonine-protein phosphatase 2A 55 kDa regulatory subunit B beta isoform [Source:NCBI gene;Acc:109994440]	ppp2r2c	PPP2R2C	37.6531	-0.551904	0.00441163	0.214657
ENSLBEG00000021020	0	0	#N/A	134.441	-0.553663	0.00643366	0.238117
ENSLBEG00000011582	reversion inducing cysteine rich protein with kazal motifs [Source:NCBI gene;Acc:109988359]	reck	RECK	131.819	-0.55557	0.00166016	0.158949
ENSLBEG00000021088	uncharacterized LOC110002620 [Source:NCBI gene;Acc:110002620]	0	#N/A	233.225	-0.556944	0.0028045	0.18291
ENSLBEG00000017261	atlastin GTPase 1 [Source:NCBI gene;Acc:110001807]	atl1	ATL1	85.1311	-0.559434	0.00853857	0.261051
ENSLBEG00000000367	SRY-box 5 [Source:NCBI gene;Acc:109987619]	sox5	SOX5	826.281	-0.560097	0.0046975	0.214739
ENSLBEG00000004613	SH2 domain containing 3C [Source:NCBI gene;Acc:109987102]	sh2d3ca	SH2D3C	1092.54	-0.56112	0.00280047	0.18291
ENSLBEG00000027902	potassium two pore domain channel subfamily K member 18 [Source:NCBI gene;Acc:109976309]	kcnk18	KCNK18	75.6875	-0.561782	0.00367832	0.202446
ENSLBEG00000000725	protein NDRG1-like [Source:NCBI gene;Acc:109982445]	ndrg1a	NDRG1	17099.5	-0.567578	0.00166455	0.158949
ENSLBEG00000019034	C-X-C motif chemokine ligand 14 [Source:NCBI gene;Acc:110001188]	cxcl14	CXCL14	945.776	-0.574636	0.00190336	0.165107
ENSLBEG00000018876	transcription factor Sp3-like [Source:NCBI gene;Acc:109998309]	sp3b	SP3	369.576	-0.586908	0.00650392	0.238211
ENSLBEG00000022221	phospholipid phosphatase 2-like [Source:NCBI gene;Acc:109996162]	plpp2	PLPP2	604.062	-0.586931	0.00254944	0.18291
ENSLBEG00000020787	family with sequence similarity 110 member C [Source:NCBI gene;Acc:109983231]	fam110c	FAM110C	185.687	-0.587474	0.000570885	0.108874
ENSLBEG00000010398	V-type proton ATPase 116 kDa subunit a-like [Source:NCBI gene;Acc:110002433]	atp6v0a2b	ATP6V0A2	168.555	-0.587617	0.00617314	0.233304
ENSLBEG00000014972	Na(+)/H(+) exchange regulatory cofactor NHE-RF2-like [Source:NCBI gene;Acc:110000629]	SLC9A3R2	SLC9A3R2	86.0017	-0.58796	0.00102818	0.141523
ENSLBEG00000009436	lysophosphatidylglycerol acyltransferase 1 [Source:NCBI gene;Acc:109979335]	lpgat1	LPGAT1	1007.99	-0.588035	0.00473298	0.214739
ENSLBEG00000026080	brain-specific angiogenesis inhibitor 1-associated protein 2-like protein 1 [Source:NCBI gene;Acc:110000332]	baiap2l1	BAIAP2L1	582.225	-0.591112	0.00270742	0.18291
ENSLBEG00000024475	neuron navigator 1 [Source:NCBI gene;Acc:109981740]	nav1b	NAV1	276.296	-0.591546	0.00495322	0.217094
ENSLBEG00000015730	folliculin-interacting protein 1-like [Source:NCBI gene;Acc:109987288]	fnip1	FNIP1	96.8327	-0.592461	0.00902142	0.263689
ENSLBEG00000001582	ATPase phospholipid transporting 11B (putative) [Source:NCBI gene;Acc:109998550]	ATP11B	ATP11B	196.157	-0.592554	0.00870503	0.262943
ENSLBEG00000013369	CXADR, Ig-like cell adhesion molecule [Source:NCBI gene;Acc:109982126]	cxadr	CXADR	3488.84	-0.592791	0.00109324	0.146837
ENSLBEG00000016886	fin bud initiation factor a [Source:ZFIN;Acc:ZDB-GENE-111031-2]	fibina	FIBIN	53.564	-0.592956	0.00530912	0.221059
ENSLBEG00000026808	fibrinogen-like protein 1-like protein [Source:NCBI gene;Acc:109981405]	FGL1	FGL1	521.38	-0.597503	0.00796494	0.255193
ENSLBEG00000019622	FH2 domain-containing protein 1-like [Source:NCBI gene;Acc:109996138]	fhdc3	#N/A	200.852	-0.609681	0.00237808	0.182125
ENSLBEG00000008037	docking protein 2-like [Source:NCBI gene;Acc:109995880]	dok2	DOK2	815.674	-0.615588	0.0044131	0.214657
ENSLBEG00000000027	cAMP-specific 3',5'-cyclic phosphodiesterase 4D-like [Source:NCBI gene;Acc:110000270]	PDE4D	PDE4D	130.623	-0.616676	0.0038537	0.2048
ENSLBEG00000025961	cytoplasmic polyadenylation element-binding protein 3-like [Source:NCBI gene;Acc:109998436]	cpeb3	CPEB3	374.423	-0.61726	0.00115815	0.148958
ENSLBEG00000009089	sodium/potassium/calcium exchanger 3-like [Source:NCBI gene;Acc:109987848]	SLC24A3	SLC24A3	72.067	-0.61994	0.000312727	0.0899041
ENSLBEG00000018461	rho guanine nucleotide exchange factor 19-like [Source:NCBI gene;Acc:109985103]	arhgef19	ARHGEF19	757.126	-0.624079	0.00279096	0.18291
ENSLBEG00000021242	sodium- and chloride-dependent taurine transporter-like [Source:NCBI gene;Acc:109998342]	slc6a6b	SLC6A6	14574.6	-0.626892	0.00147492	0.158949
ENSLBEG00000004048	vacuole membrane protein 1-like [Source:NCBI gene;Acc:110000967]	VMP1	VMP1	106.518	-0.627769	0.00351079	0.197401
ENSLBEG00000006892	protein Daple-like [Source:NCBI gene;Acc:109989479]	ccdc88c	CCDC88C	219.675	-0.629135	0.0053552	0.221317
ENSLBEG00000015591	guanine nucleotide exchange factor VAV3-like [Source:NCBI gene;Acc:109981016]	vav3b	VAV3	162.044	-0.631242	0.00785523	0.255193
ENSLBEG00000019855	guanine nucleotide-binding protein G(q) subunit alpha-like [Source:NCBI gene;Acc:109997137]	GNAQ	GNAQ	4925.47	-0.636523	0.00235241	0.182099
ENSLBEG00000002716	raftlin, lipid raft linker 1 [Source:NCBI gene;Acc:109988824]	RFTN1	RFTN1	280.976	-0.640653	0.00576477	0.225911
ENSLBEG00000027321	DENN domain containing 1B [Source:NCBI gene;Acc:110000287]	dennd1b	DENND1B	122.186	-0.642085	0.0058253	0.226743
ENSLBEG00000011100	sphingosine-1-phosphate phosphatase 1-like [Source:NCBI gene;Acc:109994192]	sgpp1	SGPP1	4314.98	-0.64617	0.002579	0.18291
ENSLBEG00000025602	0	0	#N/A	35.3871	-0.655633	0.00989175	0.272776
ENSLBEG00000023478	actin cytoskeleton-regulatory complex protein PAN1-like [Source:NCBI gene;Acc:110003312]	PAN1	PAN1	175.655	-0.658749	0.00973746	0.272239
ENSLBEG00000004800	forkhead box protein O3-like [Source:NCBI gene;Acc:109978071]	FOXO3	FOXO3	24.7819	-0.661395	0.00965917	0.270831
ENSLBEG00000005579	insulin like growth factor binding protein 5 [Source:NCBI gene;Acc:109986038]	igfbp5b	IGFBP5	699.609	-0.666343	0.00251111	0.18291
ENSLBEG00000010596	B-cell lymphoma/leukemia 11A-like [Source:NCBI gene;Acc:109990648]	bcl11a	BCL11A	470.616	-0.668035	1.38495e-05	0.0256293
ENSLBEG00000005916	zinc fingers and homeoboxes 1 [Source:NCBI gene;Acc:109984059]	ZHX1	ZHX1	39.2353	-0.669957	0.00923361	0.264485
ENSLBEG00000019991	chromosome unknown C1orf159 homolog [Source:NCBI gene;Acc:109990339]	CUNH1orf159	CUNH1ORF159	287.157	-0.674652	0.0030698	0.189216
ENSLBEG00000022914	schwannomin-interacting protein 1-like [Source:NCBI gene;Acc:109985753]	schip1	IQCJ-SCHIP1	568.381	-0.68165	0.00464903	0.214739
ENSLBEG00000000784	WNT1 inducible signaling pathway protein 1 [Source:NCBI gene;Acc:109982446]	wisp1a	WISP1	260.265	-0.697371	0.00162796	0.158949
ENSLBEG00000023912	putative E3 ubiquitin-protein ligase UNKL [Source:NCBI gene;Acc:109990376]	unkl	UNKL	189.308	-0.706638	0.00641638	0.238108
ENSLBEG00000012361	3'(2'), 5'-bisphosphate nucleotidase 1 [Source:NCBI gene;Acc:109979075]	bpnt1	BPNT1	596.252	-0.713794	0.00686968	0.241381
ENSLBEG00000020556	0	0	#N/A	140.436	-0.716355	0.00533628	0.221317
ENSLBEG00000012431	unconventional myosin-Id-like [Source:NCBI gene;Acc:109992391]	MYO1D	MYO1D	192.43	-0.725534	0.00797674	0.255193
ENSLBEG00000002358	0	RF01291	RF01291	6533.59	-0.727188	0.00885714	0.263556
ENSLBEG00000022314	transcription intermediary factor 1-alpha-like [Source:NCBI gene;Acc:110005259]	TRIM24	TRIM24	231.636	-0.729611	0.000403329	0.0939436
ENSLBEG00000014297	0	0	#N/A	256.928	-0.738133	0.00566397	0.22407
ENSLBEG00000027168	coiled-coil domain-containing protein 129-like [Source:NCBI gene;Acc:109987464]	ITPRID1	ITPRID1	45.2945	-0.743418	0.00887733	0.263556
ENSLBEG00000016076	0	0	#N/A	619.671	-0.746458	0.00461061	0.214739
ENSLBEG00000004361	nuclear receptor coactivator 2-like [Source:NCBI gene;Acc:110002336]	NCOA2	NCOA2	46.1422	-0.747987	0.00469026	0.214739
ENSLBEG00000001928	tumor susceptibility gene 101 protein-like [Source:NCBI gene;Acc:109990192]	zgc:123278	ZGC:123278	3572.26	-0.758102	0.00985336	0.272776
ENSLBEG00000012386	solute carrier family 26 member 1 [Source:NCBI gene;Acc:109986705]	slc26a2	SLC26A2	30.9404	-0.76131	0.00847003	0.261051
ENSLBEG00000024554	cell division cycle associated 7b [Source:ZFIN;Acc:ZDB-GENE-030131-607]	cdca7	CDCA7	715.556	-0.762534	0.0067119	0.240458
ENSLBEG00000011689	0	0	#N/A	613.837	-0.76364	0.00325462	0.193592
ENSLBEG00000018413	protein polyglycylase TTLL10-like [Source:NCBI gene;Acc:109985085]	ttll10	TTLL10	28.3908	-0.76399	0.00557841	0.22407
ENSLBEG00000018062	0	0		79.8823	-0.773765	0.00828886	0.258039
ENSLBEG00000024681	hes family bHLH transcription factor 1 [Source:NCBI gene;Acc:109987975]	her6	HES1	167.06	-0.782623	0.00033319	0.0907411
ENSLBEG00000001774	growth hormone-regulated TBC protein 1-A-like [Source:NCBI gene;Acc:109995146]	grtp1b	GRTP1	53.915	-0.785208	0.00261149	0.18291
ENSLBEG00000018148	zinc finger and BTB domain containing 7A [Source:NCBI gene;Acc:109982739]	zbtb7a	ZBTB7A	260.086	-0.789337	0.00955789	0.269808
ENSLBEG00000018924	sodium channel protein type 8 subunit alpha-like [Source:NCBI gene;Acc:109992489]	scn8ab	SCN8A	87.6477	-0.792277	0.000526378	0.105625
ENSLBEG00000028581	phospholipase DDHD1-like [Source:NCBI gene;Acc:109987583]	ddhd1	DDHD1	728.988	-0.795358	3.0476e-05	0.0380325
ENSLBEG00000024158	major facilitator superfamily domain containing 2A [Source:NCBI gene;Acc:109990902]	mfsd2ab	MFSD2A	819.948	-0.803367	0.0014142	0.158949
ENSLBEG00000010696	uridine-cytidine kinase 2-B [Source:NCBI gene;Acc:109996876]	uck2b	UCK2	114.608	-0.804213	0.00348546	0.197401
ENSLBEG00000012157	WAP four-disulfide core domain 1 [Source:NCBI gene;Acc:109987863]	wfdc1	WFDC1	234.578	-0.805581	0.00194819	0.16812
ENSLBEG00000005737	0	0	#N/A	205.932	-0.806223	0.00753656	0.251043
ENSLBEG00000023080	ATP binding cassette subfamily G member 5 [Source:NCBI gene;Acc:109996212]	abcg5	ABCG5	4698.51	-0.807816	0.00460623	0.214739
ENSLBEG00000028587	methionine sulfoxide reductase B2 [Source:NCBI gene;Acc:109999174]	msrb2	MSRB2	719.361	-0.820279	0.00558408	0.22407
ENSLBEG00000027229	myelin transcription factor 1 [Source:NCBI gene;Acc:110002023]	myt1b	MYT1	34.3142	-0.827658	0.00323379	0.193592
ENSLBEG00000001958	SLAM family member 9-like [Source:NCBI gene;Acc:109975459]	SLAMF9	SLAMF9	72.5469	-0.831729	0.00989078	0.272776
ENSLBEG00000016227	lymphocyte function-associated antigen 3-like [Source:NCBI gene;Acc:110004687]	CD58	CD58	57.6438	-0.838372	0.00236165	0.182099
ENSLBEG00000015154	gap junction protein delta 3 [Source:HGNC Symbol;Acc:HGNC:19147]	GJD3	GJD3	430.853	-0.841237	0.000921516	0.127899
ENSLBEG00000022266	bile acid-CoA:amino acid N-acyltransferase-like [Source:NCBI gene;Acc:109990269]	BAAT	BAAT	272.508	-0.846356	0.00529221	0.221059
ENSLBEG00000021810	HIC ZBTB transcriptional repressor 1 [Source:NCBI gene;Acc:109999461]	hic1	HIC1	129.61	-0.859578	0.00854235	0.261051
ENSLBEG00000001214	si:ch211-256a21.4 [Source:ZFIN;Acc:ZDB-GENE-131121-329]	si:ch211-256a21.4	SI:CH211-256A21.4	44.8676	-0.86435	0.00740651	0.249294
ENSLBEG00000008925	acyl-CoA desaturase-like [Source:NCBI gene;Acc:109992983]	scd	SCD	555.866	-0.872079	0.00693593	0.242084
ENSLBEG00000025292	ladderlectin-like [Source:NCBI gene;Acc:110001351]	0	#N/A	17556.8	-0.875803	0.00407177	0.207915
ENSLBEG00000003199	transcription factor SOX-6-like [Source:NCBI gene;Acc:109985962]	SOX6	SOX6	91.0351	-0.879687	0.000664789	0.117788
ENSLBEG00000013341	0	0	#N/A	54.1418	-0.881883	0.00405732	0.207915
ENSLBEG00000020337	laminin subunit beta-2-like [Source:NCBI gene;Acc:109985095]	lamb2l	LAMB2L	1059.42	-0.900261	0.00167013	0.158949
ENSLBEG00000020076	solute carrier family 25 member 25 [Source:NCBI gene;Acc:109988528]	slc25a25b	SLC25A25	49.2666	-0.916119	0.00608036	0.231736
ENSLBEG00000018822	cell division cycle 20 homolog [Source:ZFIN;Acc:ZDB-GENE-040426-2044]	cdc20	CDC20	512.968	-0.918605	0.000186907	0.064853
ENSLBEG00000026018	F-box/LRR-repeat protein 3-like [Source:NCBI gene;Acc:109997923]	fbxl3	FBXL3	26.7756	-0.926011	0.00869677	0.262943
ENSLBEG00000016143	target of Nesh-SH3-like [Source:NCBI gene;Acc:110003782]	ABI3BP	ABI3BP	53.4331	-0.930233	0.000234147	0.0779944
ENSLBEG00000012606	tubulin beta-6 chain [Source:NCBI gene;Acc:109986195]	TUBB6	TUBB6	13.9644	-0.934038	0.00787922	0.255193
ENSLBEG00000009811	0	zgc:194282	SRMS	90.2588	-0.944668	0.00175997	0.160177
ENSLBEG00000002974	sulfotransferase family cytosolic 2B member 1-like [Source:NCBI gene;Acc:109983023]	sult5a1	SULT1A1	20.5113	-0.956001	0.000774395	0.123802
ENSLBEG00000016280	glyoxal reductase-like [Source:NCBI gene;Acc:109991349]	yvgN	YVGN	900.142	-0.95757	0.000790765	0.123802
ENSLBEG00000025319	natural resistance-associated macrophage protein 2-like [Source:NCBI gene;Acc:109996246]	SLC11A1	SLC11A1	111.599	-0.965005	0.00582683	0.226743
ENSLBEG00000014093	0	0	#N/A	15.7963	-0.967776	0.00398325	0.206268
ENSLBEG00000008861	0	0	#N/A	408.906	-0.968271	0.00262124	0.18291
ENSLBEG00000014526	ring finger protein 223 [Source:HGNC Symbol;Acc:HGNC:40020]	RNF223	RNF223	304.44	-0.979196	0.00739106	0.249294
ENSLBEG00000016018	nuclear receptor subfamily 4 group A member 1-like [Source:NCBI gene;Acc:109986406]	nr4a1	NR4A1	712.773	-0.979994	0.00469029	0.214739
ENSLBEG00000000147	uncharacterized LOC109992842 [Source:NCBI gene;Acc:109992842]	0	#N/A	41.4145	-0.989589	0.00464699	0.214739
ENSLBEG00000002215	regakine-1-like [Source:NCBI gene;Acc:109984080]	CXCL8	CXCL8	699.472	-0.997166	7.17113e-05	0.0459366
ENSLBEG00000009913	ladderlectin-like [Source:NCBI gene;Acc:110003726]	0	#N/A	14502.9	-0.997594	0.00771873	0.253998
ENSLBEG00000015981	gametocyte-specific factor 1-like [Source:NCBI gene;Acc:109986786]	GTSF1	GTSF1	98.2637	-1.00813	0.00622233	0.234464
ENSLBEG00000001567	apolipoprotein A-I-like [Source:NCBI gene;Acc:109996309]	APO1	APO1	24572	-1.01771	0.00300264	0.189216
ENSLBEG00000021355	activin A receptor type 1C [Source:NCBI gene;Acc:109997186]	ACVR1C	ACVR1C	373.485	-1.02092	0.000432777	0.0948408
ENSLBEG00000002701	mesenteric estrogen dependent adipogenesis [Source:NCBI gene;Acc:109991721]	MEDAG	MEDAG	1570.44	-1.06914	0.00260114	0.18291
ENSLBEG00000019831	calpain-1 catalytic subunit-like [Source:NCBI gene;Acc:109992138]	CAPN14	CAPN14	4220.81	-1.06937	0.000329546	0.0907411
ENSLBEG00000018923	hyaluronidase-2-like [Source:NCBI gene;Acc:109990332]	HYAL2	HYAL2	2554.52	-1.06993	0.000455646	0.0972921
ENSLBEG00000010215	G1/S-specific cyclin-D2-like [Source:NCBI gene;Acc:109993576]	ccnd2b	CCND2	46.8967	-1.07234	0.00582403	0.226743
ENSLBEG00000001165	0	0	#N/A	41.8457	-1.07981	0.00391338	0.2048
ENSLBEG00000010514	ras-specific guanine nucleotide-releasing factor 2-like [Source:NCBI gene;Acc:110000545]	rasgrf2a	RASGRF2	103.606	-1.12656	0.00225176	0.176071
ENSLBEG00000000565	alpha-1,3-mannosyl-glycoprotein 4-beta-N-acetylglucosaminyltransferase B-like [Source:NCBI gene;Acc:109998496]	MGAT4B	MGAT4B	256.479	-1.13224	0.00570006	0.224963
ENSLBEG00000025331	PLAC8 like 1 [Source:NCBI gene;Acc:109995646]	plac8l1	PLAC8L1	107.329	-1.13361	0.00305241	0.189216
ENSLBEG00000005053	early growth response 3 [Source:NCBI gene;Acc:110002329]	egr3	EGR3	187.424	-1.19809	0.00516509	0.221059
ENSLBEG00000016248	ubiquitin carboxyl-terminal hydrolase 12-like [Source:NCBI gene;Acc:110000078]	usp12b	USP46	268.232	-1.2195	0.00175015	0.160177
ENSLBEG00000002511	zgc:113337 [Source:ZFIN;Acc:ZDB-GENE-050306-20]	zgc:113337	PVR	47.0341	-1.22871	0.0042232	0.210905
ENSLBEG00000013994	tripartite motif-containing protein 35-like [Source:NCBI gene;Acc:110004617]	TRIM35	TRIM35	30.6277	-1.23438	0.00902022	0.263689
ENSLBEG00000024555	beta-arrestin-1 [Source:NCBI gene;Acc:110004050]	arrb1	ARRB1	16.4728	-1.23954	0.00515489	0.221059
ENSLBEG00000021349	0	0	#N/A	991.05	-1.29509	0.00144756	0.158949
ENSLBEG00000008838	0	0	#N/A	133.853	-1.31588	0.00732093	0.248837
ENSLBEG00000010501	nuclear receptor subfamily 1 group D member 1-like [Source:NCBI gene;Acc:109984954]	nr1d4a	NR1D4	755.296	-1.32374	0.000443808	0.095995
ENSLBEG00000000444	uncharacterized LOC109992833 [Source:NCBI gene;Acc:109992833]	0	#N/A	16.4256	-1.34267	0.00466396	0.214739
ENSLBEG00000000507	0	0	#N/A	304.988	-1.35752	0.00339166	0.196078
ENSLBEG00000013198	dapper homolog 2-like [Source:NCBI gene;Acc:109987220]	dact2	DACT2	24.7523	-1.37412	0.00272022	0.18291
ENSLBEG00000002859	E3 SUMO-protein ligase CBX4-like [Source:NCBI gene;Acc:109999250]	CBX4	CBX4	1783.13	-1.39266	6.7866e-05	0.0454848
ENSLBEG00000015859	thymidine kinase 2, mitochondrial-like [Source:NCBI gene;Acc:109975135]	tk2	TK2	40.9487	-1.40149	0.00393187	0.2048
ENSLBEG00000007693	primary amine oxidase, liver isozyme-like [Source:NCBI gene;Acc:109991810]	aoc2	AOC3	1173.79	-1.42247	0.00799245	0.255193
ENSLBEG00000024567	protein FAM102B-like [Source:NCBI gene;Acc:109984066]	FAM102B	FAM102B	200.618	-1.46153	0.000403467	0.0939436
ENSLBEG00000021906	0	0	#N/A	7.8788	-1.50367	0.00696711	NA
ENSLBEG00000011370	0	0	#N/A	383.146	-1.50671	0.00041702	0.0939436
ENSLBEG00000025559	si:ch211-137i24.10 [Source:ZFIN;Acc:ZDB-GENE-060526-34]	si:ch211-137i24.10	SI:CH211-137I24.10	8.99478	-1.51218	0.00507764	NA
ENSLBEG00000009128	lithostathine-like [Source:NCBI gene;Acc:109975656]	REG1A	REG1A	8444.37	-1.52616	5.17001e-05	0.0443377
ENSLBEG00000014306	membrane-spanning 4-domains subfamily A member 4D-like [Source:NCBI gene;Acc:110005078]	MS4A4A	MS4A4A	2100.05	-1.53891	1.08116e-05	0.0225084
ENSLBEG00000020027	0	0	#N/A	8.64137	-1.5438	0.00541288	NA
ENSLBEG00000020387	Krueppel-like factor 11 [Source:NCBI gene;Acc:110001225]	klf11a	KLF11	142.742	-1.55636	0.00323776	0.193592
ENSLBEG00000004080	0	0	#N/A	35.28	-1.59794	0.000746765	0.123802
ENSLBEG00000012547	tumor necrosis factor-like [Source:NCBI gene;Acc:109993620]	TNF	TNF	41.1216	-1.61088	0.000386768	0.0936999
ENSLBEG00000001703	cartilage intermediate layer protein [Source:NCBI gene;Acc:109983001]	cilp	CILP	8.19561	-1.62906	0.00343424	NA
ENSLBEG00000002625	0	0	#N/A	194.328	-1.64878	0.00519354	0.221059
ENSLBEG00000001575	0	0	#N/A	848.584	-1.65334	9.17668e-05	0.0497737
ENSLBEG00000012984	0	0	#N/A	33.9041	-1.68597	0.000336995	0.0907411
ENSLBEG00000002199	monocyte chemotactic protein 1B-like [Source:NCBI gene;Acc:109984093]	ccl2	CCL2	250.235	-1.68814	9.33306e-07	0.0051814
ENSLBEG00000021610	3-oxo-5-beta-steroid 4-dehydrogenase-like [Source:NCBI gene;Acc:110004693]	AKR1D1	AKR1D1	176.951	-1.72121	5.35318e-05	0.0443377
ENSLBEG00000028216	septin-5-like [Source:NCBI gene;Acc:110004187]	sept6	SEPT6	8.79596	-1.74407	0.00680442	NA
ENSLBEG00000007311	tripartite motif-containing protein 16-like [Source:NCBI gene;Acc:109976086]	TRIM16	TRIM16L	11.1312	-1.89904	0.00650682	0.238211
ENSLBEG00000006843	intraflagellar transport protein 56 [Source:NCBI gene;Acc:109976071]	TTC26	TTC26	4.04774	-1.9014	0.00779028	NA
ENSLBEG00000028192	early growth response protein 2b-like [Source:NCBI gene;Acc:109988720]	EGR2	EGR2	80.4171	-1.9298	0.000159335	0.064853
ENSLBEG00000010047	0	0	#N/A	7.71975	-1.97453	0.000898873	NA
ENSLBEG00000025456	E3 ubiquitin-protein ligase TRIM39-like [Source:NCBI gene;Acc:110001367]	TRIM39	TRIM39	10.9938	-2.0206	0.00445524	0.214739
ENSLBEG00000008891	ADP-ribosyl cyclase/cyclic ADP-ribose hydrolase 1-like [Source:NCBI gene;Acc:109975642]	CD38	CD38	26.6516	-2.10626	0.0078751	0.255193
ENSLBEG00000024346	heparan sulfate glucosamine 3-O-sulfotransferase 6-like [Source:NCBI gene;Acc:109990409]	HS3ST6	HS3ST6	75.3745	-2.16974	9.04506e-05	0.0497737
ENSLBEG00000013465	0	0	#N/A	13.1743	-2.19137	0.00717486	0.246668
ENSLBEG00000016939	0	0	#N/A	98.5436	-2.21656	0.0014893	0.158949
ENSLBEG00000012444	T-box transcription factor TBX1-like [Source:NCBI gene;Acc:109991924]	TBX1	TBX1	29.8642	-2.22848	0.00204374	0.170371
ENSLBEG00000020883	0	0	#N/A	20.5092	-2.26067	0.00416466	0.209759
ENSLBEG00000028885	0	0	#N/A	17.3172	-2.3916	0.00357425	0.199094
ENSLBEG00000000376	0	0	#N/A	68.7739	-2.55098	0.0060559	0.231389
ENSLBEG00000010868	0	0	#N/A	44.618	-2.59042	0.00552698	0.223559
ENSLBEG00000013946	0	0	#N/A	12.8401	-2.64125	0.00929311	0.265029
ENSLBEG00000005315	0	0	#N/A	13.7421	-2.76358	0.00250886	0.18291
ENSLBEG00000005076	ladderlectin-like [Source:NCBI gene;Acc:110002359]	RTLL	RTLL	353.303	-2.80355	0.00777343	0.254355
ENSLBEG00000025262	0	0	#N/A	14.5369	-2.89054	0.00486669	0.216146
ENSLBEG00000023095	0	0	#N/A	8.19301	-3.09524	0.000516876	NA
ENSLBEG00000014618	0	0	#N/A	211.488	-3.32964	0.00198972	0.169075
ENSLBEG00000026056	von Willebrand factor A domain-containing protein 7-like [Source:NCBI gene;Acc:109989800]	vwa11	vwa11	1096.01	-3.42009	0.000115566	0.0524886
ENSLBEG00000015235	0	0	#N/A	10.0017	-3.66572	0.00215042	0.174709
ENSLBEG00000013920	0	CD59	CD59	15.4334	-3.81254	9.37567e-05	0.0497737
ENSLBEG00000007458	0	IGHM	IGHM	134.703	-4.16133	8.48968e-07	0.0051814
ENSLBEG00000002523	trypsin-1-like [Source:NCBI gene;Acc:110002290]	PRSS1	PRSS1	63.238	-4.55004	2.04949e-05	0.0310312
ENSLBEG00000014335	0	0	#N/A	50.2344	-4.73745	0.000517411	0.105091
ENSLBEG00000004222	lipocalin 15 [Source:ZFIN;Acc:ZDB-GENE-060825-349]	lcn15	PTGDS	317.577	0.800306	0.0100086	0.274166
ENSLBEG00000001425	cAMP-dependent protein kinase inhibitor beta [Source:NCBI gene;Acc:109987066]	si:ch211-255i3.4	SI:CH211-255I3.4	1555.63	-0.272499	0.0100551	0.274987
ENSLBEG00000008387	G protein-coupled receptor class C group 6 member A [Source:NCBI gene;Acc:110000505]	gprc6a	GPRC6A	66.332	0.853606	0.0101223	0.276163
ENSLBEG00000023651	solute carrier family 22 member 2-like [Source:NCBI gene;Acc:109986398]	slc22a2	SLC22A2	27.9087	1.43605	0.0101312	0.276163
ENSLBEG00000005423	C-type mannose receptor 2-like [Source:NCBI gene;Acc:109983088]	mrc2	MRC2	129.313	0.656584	0.0101884	0.277268
ENSLBEG00000009433	pyroglutamyl-peptidase 1-like [Source:NCBI gene;Acc:109975714]	PGPEP1	PGPEP1	112.982	-0.603813	0.0102293	0.277925
ENSLBEG00000015200	muscleblind-like protein 2a [Source:NCBI gene;Acc:109990187]	mbnl2	MBNL2	35.6873	-0.681037	0.0102475	0.277968
ENSLBEG00000018569	retinol dehydrogenase 11-like [Source:NCBI gene;Acc:110002556]	rdh12	RDH12	29.2822	-1.14623	0.0103012	0.278318
ENSLBEG00000025749	STEAP3 metalloreductase [Source:NCBI gene;Acc:109997308]	STEAP3	STEAP3	94.358	0.517186	0.010311	0.278318
ENSLBEG00000012321	ribonuclease Oy-like [Source:NCBI gene;Acc:109977811]	0	#N/A	219.753	-0.560707	0.010328	0.278318
ENSLBEG00000000192	0	0	#N/A	43.5025	-0.754384	0.0103615	0.278318
ENSLBEG00000002928	protein C8orf4 homolog [Source:NCBI gene;Acc:110002292]	tcim	TCIM	487.329	0.58211	0.0103651	0.278318
ENSLBEG00000005106	polypeptide N-acetylgalactosaminyltransferase 16 [Source:NCBI gene;Acc:110002362]	galnt16	GALNT16	87.509	-0.499277	0.0103872	0.278318
ENSLBEG00000012065	delta-1-pyrroline-5-carboxylate synthase-like [Source:NCBI gene;Acc:109987223]	ALDH18A1	ALDH18A1	246.321	0.643176	0.0103995	0.278318
ENSLBEG00000015403	DExD-box helicase 52 [Source:NCBI gene;Acc:109998222]	ddx52	DDX52	74.6807	0.624419	0.0104009	0.278318
ENSLBEG00000028706	peripherin-like [Source:NCBI gene;Acc:109992713]	0	#N/A	14.7871	-1.44954	0.0104358	0.278318
ENSLBEG00000029012	0	0	#N/A	46.8483	0.959852	0.0104377	0.278318
ENSLBEG00000012813	calcium-binding mitochondrial carrier protein SCaMC-1-A-like [Source:NCBI gene;Acc:110003808]	slc25a24l	SLC25A25	368.039	-0.484177	0.0104453	0.278318
ENSLBEG00000012171	0	0	#N/A	350.416	-1.06071	0.0104621	0.278318
ENSLBEG00000005004	0	0	#N/A	79.7634	-0.853029	0.0104849	0.278318
ENSLBEG00000006509	60S ribosomal protein L5-like [Source:NCBI gene;Acc:109996143]	RPL5	RPL5	1067.24	0.456463	0.0104944	0.278318
ENSLBEG00000011632	transcriptional activator GLI3-like [Source:NCBI gene;Acc:109983801]	gli3	GLI3	37.7096	0.485886	0.0105113	0.278323
ENSLBEG00000021543	ATP-citrate synthase-like [Source:NCBI gene;Acc:110002629]	0	#N/A	5120.72	-0.639161	0.0105433	0.278697
ENSLBEG00000012987	diacylglycerol O-acyltransferase 2 [Source:NCBI gene;Acc:109982143]	dgat2	DGAT2	109.002	0.785696	0.0105589	0.278697
ENSLBEG00000008358	dihydroxyacetone phosphate acyltransferase-like [Source:NCBI gene;Acc:109990055]	si:ch73-21k16.5	GNPAT	1824.68	-0.443016	0.0105953	0.278867
ENSLBEG00000026798	DnaJ heat shock protein family (Hsp40) member C2 [Source:NCBI gene;Acc:109993973]	dnajc2	DNAJC2	210.237	0.468174	0.0106417	0.278867
ENSLBEG00000021952	angiopoietin 1 [Source:NCBI gene;Acc:109994942]	angpt1	ANGPT1	265.238	0.433652	0.0106474	0.278867
ENSLBEG00000013063	ribosomal protein S25 [Source:NCBI gene;Acc:109990675]	rps25	RPS25	17363	0.273492	0.0106477	0.278867
ENSLBEG00000004738	protein kinase C beta type [Source:NCBI gene;Acc:109988297]	prkcba	PRKCBA	228.685	-0.728165	0.010649	0.278867
ENSLBEG00000002614	GRB2-related adapter protein-like [Source:NCBI gene;Acc:109995748]	grapa	GRAP	173.949	-0.281541	0.0106839	0.278873
ENSLBEG00000026512	protein transport protein Sec24C-like [Source:NCBI gene;Acc:109993328]	sec24c	SEC24C	214.169	0.320763	0.0106977	0.278873
ENSLBEG00000016429	E3 ubiquitin/ISG15 ligase TRIM25-like [Source:NCBI gene;Acc:109984983]	TRIM25	TRIM25	171.888	-0.480455	0.0106995	0.278873
ENSLBEG00000012526	phospholipid phosphatase 3-like [Source:NCBI gene;Acc:109995408]	PLPP3	PLPP3	151.981	0.590346	0.0107344	0.278954
ENSLBEG00000010465	multidrug resistance-associated protein 4-like [Source:NCBI gene;Acc:109992375]	abcc4	ABCC4	453.547	0.325048	0.0107417	0.278954
ENSLBEG00000028589	complement C8 gamma chain [Source:NCBI gene;Acc:109999173]	C8G	C8G	1324.9	-0.767448	0.010779	0.278954
ENSLBEG00000025655	FAD dependent oxidoreductase domain containing 1 [Source:NCBI gene;Acc:109993959]	foxred1	FOXRED1	328.69	0.660973	0.0107802	0.278954
ENSLBEG00000013517	0	0	#N/A	505.825	-0.4586	0.0108111	0.278954
ENSLBEG00000022147	si:ch211-198c19.1 [Source:ZFIN;Acc:ZDB-GENE-100922-218]	si:ch211-198c19.1	SI:CH211-198C19.1	62.1596	-0.826829	0.0108205	0.278954
ENSLBEG00000012850	receptor-interacting serine/threonine-protein kinase 3-like [Source:NCBI gene;Acc:109998157]	RIPK3	RIPK3	201.402	0.615593	0.0108313	0.278954
ENSLBEG00000006546	DNA methyltransferase 3 alpha [Source:NCBI gene;Acc:109977506]	dnmt3ab	DNMT3A	582.499	-0.34274	0.0108508	0.278954
ENSLBEG00000014467	group 3 secretory phospholipase A2-like [Source:NCBI gene;Acc:109998188]	pla2g3	PLA2G3	101.825	-1.96044	0.0108533	0.278954
ENSLBEG00000016270	nuclear factor 7, ovary-like [Source:NCBI gene;Acc:110004690]	EH28_04993	EH28_04993	83.3878	-0.778221	0.0109283	0.279929
ENSLBEG00000028416	ArfGAP with RhoGAP domain, ankyrin repeat and PH domain 2 [Source:NCBI gene;Acc:109980737]	0	#N/A	283.998	-0.393995	0.010932	0.279929
ENSLBEG00000011477	FERM domain-containing protein 4B-like [Source:NCBI gene;Acc:109999993]	frmd4bb	FRMD4B	47.4161	0.775863	0.0109417	0.279929
ENSLBEG00000005742	ribonuclease H2 subunit C [Source:NCBI gene;Acc:109985420]	rnaseh2c	RNASEH2C	106.315	0.491385	0.0109833	0.280562
ENSLBEG00000020964	H2A histone family member X1 [Source:ZFIN;Acc:ZDB-GENE-041010-42]	h2afx1	HIST2H2AB	79.3201	0.764958	0.0110075	0.280749
ENSLBEG00000007798	solute carrier family 17 member 5 [Source:NCBI gene;Acc:109987830]	slc17a5	SLC17A5	918.056	-0.358875	0.0110426	0.281214
ENSLBEG00000022986	anoctamin 10 [Source:NCBI gene;Acc:109986388]	ano10a	ANO10	676.155	-0.328706	0.0110848	0.281563
ENSLBEG00000018620	fatty acid amide hydrolase [Source:NCBI gene;Acc:109996095]	faah	FAAH	1349.77	-0.521889	0.0110901	0.281563
ENSLBEG00000001131	DAP3 binding cell death enhancer 1 [Source:NCBI gene;Acc:109990452]	0	#N/A	437.33	0.405761	0.0111198	0.281605
ENSLBEG00000010860	glutaryl-CoA dehydrogenase, mitochondrial-like [Source:NCBI gene;Acc:109989578]	gcdha	GCDH	109.012	1.86002	0.0111255	0.281605
ENSLBEG00000014592	eph receptor A2 a [Source:ZFIN;Acc:ZDB-GENE-990415-63]	epha2a	EPHA2A	36.7537	0.665266	0.0111509	0.281818
ENSLBEG00000007611	teashirt homolog 3-like [Source:NCBI gene;Acc:109988319]	tshz3a	TSHZ3A	67.5702	0.486607	0.0111704	0.281879
ENSLBEG00000022743	protein NLRC3-like [Source:NCBI gene;Acc:109989723]	NLRC3	NLRC3	106.036	-3.7153	0.0111871	0.281879
ENSLBEG00000026342	catenin delta-1-like [Source:NCBI gene;Acc:109989818]	ctnnd1	CTNND1	5013.83	-0.224666	0.0112371	0.282535
ENSLBEG00000015129	0	0	#N/A	113.683	-1.14509	0.0112594	0.282535
ENSLBEG00000002655	GTPase IMAP family member 5-like [Source:NCBI gene;Acc:109992255]	GIMAP5	GIMAP5	355.476	-0.709606	0.0112641	0.282535
ENSLBEG00000023971	chaperonin containing TCP1 subunit 3 [Source:NCBI gene;Acc:109997248]	cct3	CCT3	1535.46	0.524289	0.0113243	0.283618
ENSLBEG00000001268	cell adhesion molecule 4 [Source:NCBI gene;Acc:109996285]	cadm4	CADM4	907.003	-0.35823	0.011351	0.28386
ENSLBEG00000002718	0	0	#N/A	65.7995	1.28887	0.0113796	0.28415
ENSLBEG00000025473	dedicator of cytokinesis 10 [Source:NCBI gene;Acc:109988041]	dock10	DOCK10	1056.19	-0.378839	0.0114146	0.284597
ENSLBEG00000022417	reticulon 1 [Source:NCBI gene;Acc:109992558]	rtn1b	RTN1	310.749	0.571079	0.0114414	0.284839
ENSLBEG00000027857	ribosomal protein L28 [Source:NCBI gene;Acc:109998474]	rpl28	RPL28	9748.6	0.323894	0.0114666	0.284991
ENSLBEG00000001378	eukaryotic translation elongation factor 1 gamma [Source:NCBI gene;Acc:109986457]	eef1g	EEF1G	11916.1	0.392318	0.0114857	0.284991
ENSLBEG00000026294	ATP binding cassette subfamily A member 3 [Source:NCBI gene;Acc:109994288]	abca3b	ABCA3	857.778	-0.497211	0.0114989	0.284991
ENSLBEG00000014357	X-linked inhibitor of apoptosis [Source:NCBI gene;Acc:109981025]	xiap	XIAP	1122.32	-0.258132	0.011575	0.286451
ENSLBEG00000002421	ribosomal protein S14 [Source:NCBI gene;Acc:109983527]	rps14	RPS14	7035.86	0.442957	0.0116213	0.287171
ENSLBEG00000021175	0	0	#N/A	31.388	-1.85397	0.0117136	0.289021
ENSLBEG00000022985	ETS variant 5 [Source:NCBI gene;Acc:109986947]	etv5a	ETV5	423.522	0.740347	0.0117715	0.289335
ENSLBEG00000023362	nucleotide binding protein 1 [Source:NCBI gene;Acc:110001291]	nubp1	NUBP1	419.801	0.369216	0.0117767	0.289335
ENSLBEG00000025417	max-interacting protein 1-like [Source:NCBI gene;Acc:109998424]	mxi1	MXI1	1381.22	-0.367287	0.0118013	0.289335
ENSLBEG00000022698	RNA polymerase III subunit G [Source:NCBI gene;Acc:109996686]	0	#N/A	42.6577	1.0519	0.0118133	0.289335
ENSLBEG00000002210	oxysterol-binding protein-related protein 3-like [Source:NCBI gene;Acc:109989928]	osbpl3a	OSBPL3A	589.119	0.278104	0.011826	0.289335
ENSLBEG00000012820	BCL2 associated athanogene 3 [Source:NCBI gene;Acc:109999412]	bag3	BAG3	116.957	0.395673	0.0118368	0.289335
ENSLBEG00000023847	N-alpha-acetyltransferase 15, NatA auxiliary subunit-like [Source:NCBI gene;Acc:109994459]	naa15a	NAA15	315.978	0.455808	0.0118546	0.289335
ENSLBEG00000008119	inosine monophosphate dehydrogenase 2 [Source:NCBI gene;Acc:109993540]	impdh2	IMPDH2	124.976	0.693761	0.0118652	0.289335
ENSLBEG00000023980	ankyrin repeat and SOCS box containing 6 [Source:NCBI gene;Acc:109983298]	asb6	ASB6	69.3793	0.502123	0.0118834	0.289354
ENSLBEG00000004580	transmembrane protein 189-like [Source:NCBI gene;Acc:109988898]	tmem189	TMEM189	17.4097	-0.845093	0.0120327	0.291871
ENSLBEG00000020921	ankyrin repeat and SOCS box protein 9-like [Source:NCBI gene;Acc:109984363]	0	#N/A	13.6453	0.90334	0.012037	0.291871
ENSLBEG00000026134	TNF receptor associated factor 4 [Source:NCBI gene;Acc:109996773]	traf4a	TRAF4	672.422	-0.377334	0.0120394	0.291871
ENSLBEG00000022016	0	0	#N/A	108.712	-0.551761	0.0120597	0.29194
ENSLBEG00000003001	ribosomal protein L27a [Source:HGNC Symbol;Acc:HGNC:10329]	RPL27A	RPL27A	13732.3	0.353596	0.0120797	0.291999
ENSLBEG00000018210	fatty acid-binding protein, heart-like [Source:NCBI gene;Acc:109997762]	fabp11a	PMP2	1693.76	0.49414	0.0121228	0.292616
ENSLBEG00000025854	testis-expressed protein 2-like [Source:NCBI gene;Acc:109985847]	tex2	TEX2	178.905	-0.46724	0.0121447	0.292722
ENSLBEG00000015659	secretogranin V [Source:NCBI gene;Acc:109988407]	scg5	SCG5	71.7288	0.610339	0.0121677	0.292851
ENSLBEG00000004039	eukaryotic translation initiation factor 3 subunit E-A-like [Source:NCBI gene;Acc:109984745]	eif3ea	EIF3E	2428.51	0.355409	0.0121861	0.29287
ENSLBEG00000025120	nuclear receptor corepressor 2-like [Source:NCBI gene;Acc:109983314]	ncor2	NCOR2	442.386	-0.626108	0.0122085	0.292987
ENSLBEG00000005019	0	0	#N/A	124.144	2.63717	0.0123049	0.294332
ENSLBEG00000012042	0	0	#N/A	123.461	-2.52502	0.0123069	0.294332
ENSLBEG00000002663	serum/glucocorticoid regulated kinase 1 [Source:NCBI gene;Acc:109987687]	SGK1	SGK1	1469.42	0.974302	0.0123319	0.294332
ENSLBEG00000026136	apoptosis regulatory protein Siva-like [Source:NCBI gene;Acc:109981374]	siva1	SIVA1	9.51556	-1.43188	0.0123638	0.294332
ENSLBEG00000017538	eukaryotic translation initiation factor 4 gamma 1 [Source:NCBI gene;Acc:109986255]	EIF4G1	EIF4G1	512.408	0.366918	0.0123679	0.294332
ENSLBEG00000000051	lin-52 DREAM MuvB core complex component [Source:NCBI gene;Acc:109981264]	lin52	LIN52	88.4884	-0.502479	0.0123846	0.294332
ENSLBEG00000019290	high choriolytic enzyme 1-like [Source:NCBI gene;Acc:110005217]	hcea	HCEA	15.3028	1.84998	0.0123899	0.294332
ENSLBEG00000015087	MKRN2 opposite strand protein-like [Source:NCBI gene;Acc:109977223]	mkrn2os.2	MKRN2OS	85.0855	-0.761417	0.0124182	0.294332
ENSLBEG00000013045	tumor protein p53 inducible protein 11 [Source:NCBI gene;Acc:110004083]	tp53i11a	TP53I11	80.8099	0.735548	0.0124816	0.294332
ENSLBEG00000004609	bromodomain and WD repeat-containing protein 3-like [Source:NCBI gene;Acc:109981455]	brwd3	BRWD3	281.746	-0.467153	0.0125112	0.294332
ENSLBEG00000014875	methylenetetrahydrofolate reductase [Source:NCBI gene;Acc:109981576]	mthfr	MTHFR	25.6708	0.634096	0.012513	0.294332
ENSLBEG00000027964	chromosome unknown C12orf45 homolog [Source:NCBI gene;Acc:109984554]	si:dkey-48p11.3	C12orf45	26.2863	0.67901	0.0125331	0.294332
ENSLBEG00000001222	ribosomal protein S24 [Source:NCBI gene;Acc:109981887]	rps24	RPS24	11859	0.327003	0.0125333	0.294332
ENSLBEG00000004310	attractin [Source:NCBI gene;Acc:109991055]	atrn	ATRN	96.0307	-0.71869	0.0125369	0.294332
ENSLBEG00000026969	solute carrier family 10 member 2 [Source:NCBI gene;Acc:109983450]	slc10a2	SLC10A2	95.8746	2.83499	0.0125818	0.294332
ENSLBEG00000002790	elongation factor 1-alpha [Source:NCBI gene;Acc:109994071]	eef1a1l1	EEF1A1L1	386.687	2.29231	0.0125877	0.294332
ENSLBEG00000015376	collagen alpha-1(XI) chain-like [Source:NCBI gene;Acc:109981185]	col11a1b	COL11A1	42.2652	-1.13104	0.0125921	0.294332
ENSLBEG00000003873	ribosomal protein L36a [Source:HGNC Symbol;Acc:HGNC:10359]	RPL36A	RPL36A	26755.9	0.357878	0.0126008	0.294332
ENSLBEG00000000775	6-phosphofructo-2-kinase/fructose-2,6-biphosphatase 3 [Source:NCBI gene;Acc:110000904]	pfkfb3	PFKFB3	2582.76	-0.622283	0.0126211	0.294332
ENSLBEG00000014589	ribosomal protein L7 [Source:NCBI gene;Acc:109992547]	rpl7	RPL7	13041.3	0.382451	0.0126355	0.294332
ENSLBEG00000024705	0	0	#N/A	1202.58	-0.475267	0.0126668	0.294332
ENSLBEG00000012714	0	0	#N/A	434.66	-0.836343	0.0126763	0.294332
ENSLBEG00000026141	protein FAM160A1-like [Source:NCBI gene;Acc:110001389]	0	#N/A	52.827	0.6701	0.0126933	0.294332
ENSLBEG00000000564	GTPase IMAP family member 4-like [Source:NCBI gene;Acc:109999195]	GIMAP4	GIMAP4	1410.95	-0.515436	0.0127221	0.294332
ENSLBEG00000016783	0	0	#N/A	277.193	-0.44984	0.0127462	0.294332
ENSLBEG00000006300	0	0	#N/A	29.9065	-0.856229	0.0127479	0.294332
ENSLBEG00000017077	protein HGH1 homolog [Source:NCBI gene;Acc:109977298]	hgh1	HGH1	28.0522	0.762477	0.0127864	0.294332
ENSLBEG00000026313	0	0	#N/A	762.943	-0.593663	0.0128023	0.294332
ENSLBEG00000006839	sterol 26-hydroxylase, mitochondrial-like [Source:NCBI gene;Acc:109996915]	cyp27a7	CYP27A1	2954.32	-0.486684	0.0128025	0.294332
ENSLBEG00000025126	tRNA methyltransferase 2 homolog A [Source:NCBI gene;Acc:109999702]	trmt2a	TRMT2A	280.599	0.439618	0.0128321	0.294332
ENSLBEG00000010050	cryptochrome circadian regulator 1 [Source:NCBI gene;Acc:109993586]	cry1aa	CRY1AA	449.228	0.516075	0.0128353	0.294332
ENSLBEG00000011505	transcription factor B1, mitochondrial [Source:NCBI gene;Acc:109995945]	tfb1m	TFB1M	97.085	0.517161	0.0128579	0.294332
ENSLBEG00000025284	BRCA2 and CDKN1A interacting protein [Source:NCBI gene;Acc:109992201]	bccip	BCCIP	513.536	0.522109	0.0128762	0.294332
ENSLBEG00000002025	membrane palmitoylated protein 1 [Source:NCBI gene;Acc:109991047]	mpp1	MPP1	7680.79	-0.490807	0.0129152	0.294332
ENSLBEG00000014421	zinc transporter Slc39a7-like [Source:NCBI gene;Acc:110005085]	slc39a7	SLC39A7	373.121	0.348473	0.0129214	0.294332
ENSLBEG00000022761	C-type lectin domain family 4 member M-like [Source:NCBI gene;Acc:109984411]	0	#N/A	206.927	0.732716	0.0129461	0.294332
ENSLBEG00000014204	cysteine rich transmembrane module containing 1 [Source:NCBI gene;Acc:109981087]	zgc:165573	ZGC:165573	7465.68	-0.519159	0.0129679	0.294332
ENSLBEG00000003104	RNA polymerase I subunit E [Source:NCBI gene;Acc:109989951]	polr1e	POLR1E	83.475	0.440698	0.0129711	0.294332
ENSLBEG00000028607	0	0	#N/A	33.7252	-1.24265	0.0129759	0.294332
ENSLBEG00000007743	NOP2/Sun RNA methyltransferase family member 5 [Source:NCBI gene;Acc:109987170]	nsun5	NSUN5	97.0382	0.586464	0.0130022	0.294332
ENSLBEG00000003430	RNA polymerase III subunit D [Source:NCBI gene;Acc:110002182]	polr3d	POLR3D	78.4847	0.576963	0.0130025	0.294332
ENSLBEG00000000446	purinergic receptor P2X 4 [Source:NCBI gene;Acc:109985953]	p2rx4b	P2RX4B	9.68591	-2.24419	0.0130068	0.294332
ENSLBEG00000011517	tetratricopeptide repeat protein 23-like [Source:NCBI gene;Acc:109991277]	ttc23	TTC23	62.0804	0.704441	0.013055	0.295022
ENSLBEG00000007060	muscleblind-like protein 3 [Source:NCBI gene;Acc:109985434]	mbnl3	MBNL3	81.0763	-0.509537	0.0130914	0.295444
ENSLBEG00000027551	nucleolar and coiled-body phosphoprotein 1-like [Source:NCBI gene;Acc:109992637]	0	#N/A	64.3955	0.547648	0.0131624	0.296644
ENSLBEG00000022536	peroxisome proliferator-activated receptor alpha-like [Source:NCBI gene;Acc:110005065]	pparab	PPARAB	1683.06	-0.420837	0.0132368	0.297918
ENSLBEG00000004700	protein TMEPAI-like [Source:NCBI gene;Acc:110005624]	0	#N/A	101.545	0.775672	0.0132742	0.298355
ENSLBEG00000022061	0	0	#N/A	91.2285	-1.71364	0.0133142	0.298852
ENSLBEG00000022597	0	0	#N/A	50.7417	1.65945	0.0135576	0.30348
ENSLBEG00000021033	unc-79 homolog, NALCN channel complex subunit [Source:NCBI gene;Acc:109992569]	UNC79	UNC79	30.2109	0.573651	0.0135692	0.30348
ENSLBEG00000002994	0	0	#N/A	97.5272	1.3385	0.0135751	0.30348
ENSLBEG00000021418	0	0	#N/A	145.004	-1.78273	0.0136146	0.303637
ENSLBEG00000023101	muscleblind-like protein 1 [Source:NCBI gene;Acc:109984038]	mbnl1	MBNL1	5639.83	-0.328238	0.0136298	0.303637
ENSLBEG00000015335	ribosomal RNA processing 12 homolog [Source:NCBI gene;Acc:109990768]	rrp12	RRP12	133.593	0.726185	0.0136542	0.303637
ENSLBEG00000004220	psychosine receptor-like [Source:NCBI gene;Acc:109997984]	gpr65	GPR65	248.014	-0.560672	0.0136765	0.303637
ENSLBEG00000018785	TP53RK binding protein [Source:NCBI gene;Acc:109998437]	tprkb	TPRKB	202.916	-0.288938	0.0136837	0.303637
ENSLBEG00000027142	FtsJ RNA methyltransferase homolog 3 [Source:NCBI gene;Acc:109995041]	ftsj3	FTSJ3	323.257	0.729916	0.013743	0.303637
ENSLBEG00000027140	lymphatic vessel endothelial hyaluronan receptor 1 [Source:NCBI gene;Acc:110005792]	0	#N/A	100.688	1.09129	0.0137445	0.303637
ENSLBEG00000018219	mitochondrial methionyl-tRNA formyltransferase [Source:NCBI gene;Acc:109989623]	mtfmt	MTFMT	64.0618	-0.477375	0.0137631	0.303637
ENSLBEG00000022589	DEAD-box helicase 27 [Source:NCBI gene;Acc:109975316]	ddx27	DDX27	161.284	0.625112	0.0137672	0.303637
ENSLBEG00000006408	excitatory amino acid transporter 1-like [Source:NCBI gene;Acc:109987779]	slc1a6	SLC1A6	123.492	0.669932	0.013813	0.303637
ENSLBEG00000002978	chordin like 2 [Source:NCBI gene;Acc:109983581]	chrdl2	CHRDL2	181.904	0.341482	0.0138151	0.303637
ENSLBEG00000022844	amphiregulin-like [Source:NCBI gene;Acc:109991600]	areg	HBEGF	66.0125	0.840949	0.013832	0.303637
ENSLBEG00000014535	nucleolar protein 4 like [Source:NCBI gene;Acc:109986529]	nol4la	NOL4LA	14.1005	-1.04494	0.0138327	0.303637
ENSLBEG00000023507	charged multivesicular body protein 5-like [Source:NCBI gene;Acc:109999662]	chmp5b	CHMP5	1370.36	-0.354662	0.0138679	0.303637
ENSLBEG00000004082	von Willebrand factor A domain containing 2 [Source:NCBI gene;Acc:109996871]	vwa2	VWA2	51.7968	-0.686347	0.0138886	0.303637
ENSLBEG00000020608	0	0	#N/A	870.409	0.533694	0.0138896	0.303637
ENSLBEG00000004225	protein phosphatase Slingshot homolog 3-like [Source:NCBI gene;Acc:109985440]	si:ch211-203d1.3	SSH3	550.972	-0.249226	0.013892	0.303637
ENSLBEG00000002829	oxysterol-binding protein-related protein 5-like [Source:NCBI gene;Acc:109989718]	osbpl5	OSBPL5	472.894	0.284946	0.0139153	0.303748
ENSLBEG00000007915	nucleolin-like [Source:NCBI gene;Acc:109995673]	0	#N/A	190.835	0.441942	0.0139349	0.303777
ENSLBEG00000017378	phosphoseryl-tRNA kinase [Source:NCBI gene;Acc:109996058]	PSTK	PSTK	106.908	0.448224	0.0140091	0.304996
ENSLBEG00000029014	GATA binding protein 5 [Source:NCBI gene;Acc:109979864]	gata5	GATA5	767.93	-0.529921	0.0140714	0.305607
ENSLBEG00000024070	sperm associated antigen 1 [Source:NCBI gene;Acc:109987443]	SPAG1	SPAG1	460.193	0.319863	0.0140891	0.305607
ENSLBEG00000012222	Rho guanine nucleotide exchange factor 37 [Source:NCBI gene;Acc:109986733]	arhgef37	ARHGEF37	299.42	-0.485573	0.0140922	0.305607
ENSLBEG00000003232	ankyrin repeat and IBR domain-containing protein 1-like [Source:NCBI gene;Acc:109982429]	ankib1a	ANKIB1A	785.641	-0.294081	0.0141311	0.305831
ENSLBEG00000002970	interleukin-8-like [Source:NCBI gene;Acc:109989974]	0	#N/A	483.588	0.628572	0.0141449	0.305831
ENSLBEG00000003249	0	0	#N/A	30.0064	0.761745	0.0141577	0.305831
ENSLBEG00000000825	uracil DNA glycosylase [Source:HGNC Symbol;Acc:HGNC:12572]	UNG	UNG	82.7323	0.584562	0.0142554	0.306276
ENSLBEG00000024271	NADPH oxidase organizer 1-like [Source:NCBI gene;Acc:109990431]	noxo1b	NOXO1B	703.882	1.46367	0.0142565	0.306276
ENSLBEG00000021988	formin binding protein 1 [Source:NCBI gene;Acc:110000216]	fnbp1b	FNBP1B	3191.97	-0.3599	0.0142828	0.306276
ENSLBEG00000019488	PRA1 family protein 3-like [Source:NCBI gene;Acc:109983878]	arl6ip5a	ARL6IP5	348.391	-0.462164	0.0142886	0.306276
ENSLBEG00000014935	ribosomal protein L10a [Source:NCBI gene;Acc:109994801]	rpl10a	RPL10A	14582.4	0.313957	0.0143092	0.306276
ENSLBEG00000000703	klotho beta [Source:NCBI gene;Acc:109990519]	klb	KLB	2556.6	-0.475832	0.0143263	0.306276
ENSLBEG00000028484	myotubularin related protein 14 [Source:NCBI gene;Acc:109988161]	mtmr14	MTMR14	180.691	-0.669225	0.01433	0.306276
ENSLBEG00000017421	ubiquitin protein ligase E3 component n-recognin 3 [Source:NCBI gene;Acc:109997094]	ubr3	UBR3	1156.55	-0.2238	0.0143356	0.306276
ENSLBEG00000013528	chaperonin containing TCP1 subunit 5 [Source:NCBI gene;Acc:109993585]	cct5	CCT5	2180.27	0.376827	0.0143438	0.306276
ENSLBEG00000000809	small nucleolar RNA, H/ACA box 26 [Source:HGNC Symbol;Acc:HGNC:32616]	RF00568	RF00568	273.498	1.14603	0.0143734	0.306517
ENSLBEG00000020633	ceramide synthase 2-like [Source:NCBI gene;Acc:109982310]	cers3a	CERS3	231.337	0.513321	0.0145249	0.308677
ENSLBEG00000010635	0	0	#N/A	13.3103	-0.993863	0.0145254	0.308677
ENSLBEG00000016212	midnolin-like [Source:NCBI gene;Acc:109982754]	midn	MIDN	579.092	0.414398	0.0145503	0.308677
ENSLBEG00000004406	ribosomal protein S6 kinase alpha-1-like [Source:NCBI gene;Acc:109990528]	rps6ka1	RPS6KA1	2654.56	-0.179918	0.0145534	0.308677
ENSLBEG00000000805	thioredoxin-like [Source:NCBI gene;Acc:109988737]	0	#N/A	1457.51	0.632774	0.0145741	0.308677
ENSLBEG00000022974	splicing factor 3a subunit 1 [Source:NCBI gene;Acc:109983322]	sf3a1	SF3A1	612.262	0.225816	0.0145979	0.308677
ENSLBEG00000020354	acyl-CoA oxidase 3, pristanoyl [Source:NCBI gene;Acc:109995543]	acox3	ACOX3	1607.67	-0.429669	0.0146045	0.308677
ENSLBEG00000018184	0	0	#N/A	12.9184	-3.16439	0.01464	0.309036
ENSLBEG00000028355	0	0	#N/A	76.9018	-0.825991	0.0146602	0.309071
ENSLBEG00000019287	0	0	#N/A	92.4341	-0.631879	0.0147239	0.309359
ENSLBEG00000001322	WAS/WASL-interacting protein family member 2-like [Source:NCBI gene;Acc:109988206]	wipf2a	WIPF2	1461.48	-0.294969	0.0147491	0.309359
ENSLBEG00000025255	serine/threonine kinase 38 like [Source:NCBI gene;Acc:109997286]	stk38l	STK38L	186.511	-0.587432	0.0147676	0.309359
ENSLBEG00000014539	sphingosine-1-phosphate receptor 4 [Source:ZFIN;Acc:ZDB-GENE-050506-8]	s1pr4	S1PR4	63.9335	1.31806	0.0147796	0.309359
ENSLBEG00000004358	TBC1 domain family member 10B [Source:NCBI gene;Acc:109992921]	tbc1d10b	TBC1D10B	877.303	-0.275501	0.0148004	0.309359
ENSLBEG00000016582	0	0	#N/A	11.8986	1.16274	0.0148018	0.309359
ENSLBEG00000017433	G protein-coupled receptor 1 [Source:NCBI gene;Acc:109984319]	gpr1	GPR1	25.9772	0.73321	0.0148039	0.309359
ENSLBEG00000002015	L-lactate dehydrogenase A chain [Source:NCBI gene;Acc:109990073]	ldha	LDHA	408.087	0.585639	0.0148372	0.309665
ENSLBEG00000000862	catenin alpha like 1 [Source:NCBI gene;Acc:109982460]	ctnnal1	CTNNAL1	21.2733	0.763585	0.0148821	0.310118
ENSLBEG00000019463	toll-like receptor 9 [Source:ZFIN;Acc:ZDB-GENE-040219-10]	tlr9	TLR9	12.5811	1.53953	0.014909	0.310118
ENSLBEG00000016197	0	0	#N/A	1016.83	-0.971837	0.0149261	0.310118
ENSLBEG00000014548	ankyrin repeat domain-containing protein 1-like [Source:NCBI gene;Acc:110003761]	0	#N/A	24.6695	-0.785349	0.0149444	0.310118
ENSLBEG00000008804	transmembrane protein 62 [Source:NCBI gene;Acc:109977773]	tmem62	TMEM62	20.9003	0.768786	0.0149615	0.310118
ENSLBEG00000010016	H2.0 like homeobox [Source:NCBI gene;Acc:109979623]	hlx1	HLX	162.15	0.3877	0.0149706	0.310118
ENSLBEG00000008820	myocilin [Source:NCBI gene;Acc:109982600]	myoc	MYOC	6.84191	2.02257	0.0150302	NA
ENSLBEG00000025312	receptor-transporting protein 3-like [Source:NCBI gene;Acc:109987953]	0	#N/A	230.636	1.17942	0.015048	0.310868
ENSLBEG00000009303	major facilitator superfamily domain-containing protein 4A-like [Source:NCBI gene;Acc:109983152]	mfsd4a	MFSD4A	150.305	0.483536	0.0150494	0.310868
ENSLBEG00000012268	G protein-coupled receptor 82 [Source:NCBI gene;Acc:109982637]	0	#N/A	82.4409	-0.555091	0.0150628	0.310868
ENSLBEG00000003378	adenylate kinase 2 [Source:NCBI gene;Acc:109994073]	ak2	AK2	819.904	0.655878	0.0151539	0.311988
ENSLBEG00000019877	calcium/calmodulin-dependent protein kinase type 1-like [Source:NCBI gene;Acc:109980621]	camk1a	CAMK1	35.3348	-0.842042	0.0151718	0.311988
ENSLBEG00000005167	0	0	#N/A	76.4283	0.4128	0.0151761	0.311988
ENSLBEG00000019822	ring finger protein 185 [Source:NCBI gene;Acc:109981228]	0	#N/A	778.306	-0.301387	0.015192	0.311988
ENSLBEG00000004014	C-X-C chemokine receptor type 1-like [Source:NCBI gene;Acc:109999265]	CXCR1	CXCR1	66.8101	1.23144	0.0152212	0.312202
ENSLBEG00000018279	0	0	#N/A	14.0788	-1.68134	0.0152403	0.312212
ENSLBEG00000016428	mutS homolog 6 [Source:NCBI gene;Acc:109999497]	msh6	MSH6	43.7183	0.565575	0.0152782	0.312602
ENSLBEG00000000690	SEC16 homolog B, endoplasmic reticulum export factor [Source:NCBI gene;Acc:109982699]	sec16b	CRYZL2P-SEC16B	830.368	-0.456542	0.0153069	0.31273
ENSLBEG00000010227	0	0	#N/A	21.5538	-0.799388	0.015322	0.31273
ENSLBEG00000028325	matrix Gla protein [Source:NCBI gene;Acc:110001505]	0	#N/A	533.934	0.684896	0.0154814	0.315561
ENSLBEG00000011337	inositol monophosphatase 1-like [Source:NCBI gene;Acc:109983771]	IMPA1	IMPA1	1344.74	0.850656	0.0154986	0.315561
ENSLBEG00000016965	insulin-like growth factor-binding protein 3 [Source:NCBI gene;Acc:109992520]	0	#N/A	10.9372	1.34336	0.0155312	0.31584
ENSLBEG00000027266	poly(A) binding protein nuclear 1 [Source:NCBI gene;Acc:109987466]	pabpn1	PABPN1	345.044	0.390461	0.0156216	0.316463
ENSLBEG00000023738	0	0	#N/A	107.516	-0.539758	0.0156333	0.316463
ENSLBEG00000024272	vacuolar protein sorting 13 homolog B [Source:NCBI gene;Acc:109987406]	VPS13B	VPS13B	237.841	-0.252909	0.0156361	0.316463
ENSLBEG00000016787	5-oxoprolinase, ATP-hydrolysing [Source:NCBI gene;Acc:109998251]	oplah	OPLAH	21.4862	0.997019	0.0156379	0.316463
ENSLBEG00000003506	protein FAM184B-like [Source:NCBI gene;Acc:110000406]	0	#N/A	6.38431	1.38166	0.0156926	NA
ENSLBEG00000002624	Josephin domain containing 1 [Source:NCBI gene;Acc:109992301]	josd1	JOSD1	454.106	-0.325147	0.0158834	0.320718
ENSLBEG00000023526	major facilitator superfamily domain containing 6 like [Source:NCBI gene;Acc:110003316]	0	#N/A	5.90542	1.83471	0.0158859	NA
ENSLBEG00000006960	dehydrogenase/reductase 12 [Source:NCBI gene;Acc:110001557]	dhrs12	DHRS12	387.189	0.535801	0.0159078	0.320718
ENSLBEG00000018543	solute carrier family 23 member 1 [Source:NCBI gene;Acc:110000127]	slc23a1	SLC23A1	1658.36	-0.499144	0.015908	0.320718
ENSLBEG00000006798	0	0	#N/A	21.4324	-2.14692	0.0159383	0.320718
ENSLBEG00000018304	EPH receptor A4 [Source:NCBI gene;Acc:109986252]	epha4a	EPHA4	202.059	0.589758	0.0159445	0.320718
ENSLBEG00000024111	serine/threonine-protein phosphatase 2A 56 kDa regulatory subunit gamma isoform-like [Source:NCBI gene;Acc:109982924]	ppp2r5cb	PPP2R5CB	955.053	-0.219953	0.015964	0.320723
ENSLBEG00000020398	bone morphogenetic protein 2-like [Source:NCBI gene;Acc:109985782]	bmp16	BMP16	441.043	-0.401759	0.016007	0.320769
ENSLBEG00000006595	heterogeneous nuclear ribonucleoprotein A/B [Source:NCBI gene;Acc:109993534]	hnrnpaba	HNRNPAB	1444.08	0.429104	0.0160132	0.320769
ENSLBEG00000015790	nucleolar and coiled-body phosphoprotein 1-like [Source:NCBI gene;Acc:109977260]	0	#N/A	40.5643	0.644778	0.016024	0.320769
ENSLBEG00000012460	0	0	#N/A	6.12082	1.30699	0.0162187	NA
ENSLBEG00000017172	XK-related protein 8-like [Source:NCBI gene;Acc:109990245]	xkr8.3	XKR8	18.3398	-0.814515	0.0162192	0.324286
ENSLBEG00000009368	dedicator of cytokinesis 5 [Source:NCBI gene;Acc:109982033]	dock5	DOCK5	836.008	-0.346029	0.0162555	0.324446
ENSLBEG00000001076	ribosomal L1 domain containing 1 [Source:NCBI gene;Acc:109992283]	rsl1d1	RSL1D1	413.988	0.537659	0.0163193	0.324446
ENSLBEG00000026948	sterol regulatory element binding transcription factor 1 [Source:NCBI gene;Acc:109985845]	srebf1	SREBF1	2131.23	-0.577689	0.0163469	0.324446
ENSLBEG00000015193	teneurin-3-like [Source:NCBI gene;Acc:109992454]	si:dkey-237h12.3	SI:DKEY-237H12.3	70.1074	-0.521912	0.0163494	0.324446
ENSLBEG00000026205	COMM domain containing 6 [Source:NCBI gene;Acc:109997930]	commd6	COMMD6	149.704	-0.393909	0.0163663	0.324446
ENSLBEG00000025764	protein tyrosine phosphatase, non-receptor type 4 [Source:NCBI gene;Acc:109994489]	ptpn4a	PTPN4A	968.348	-0.355418	0.0163691	0.324446
ENSLBEG00000007977	60S ribosomal protein L12-like [Source:NCBI gene;Acc:109978024]	0	#N/A	41.049	0.708922	0.0163692	0.324446
ENSLBEG00000012811	mannose-specific lectin-like [Source:NCBI gene;Acc:109983795]	0	#N/A	92.491	1.06615	0.0163978	0.324446
ENSLBEG00000020869	NOC2 like nucleolar associated transcriptional repressor [Source:NCBI gene;Acc:109982829]	noc2l	NOC2L	181.962	0.423106	0.0164025	0.324446
ENSLBEG00000011210	0	0	#N/A	36.7113	-0.463461	0.0164264	0.324534
ENSLBEG00000017125	ribosomal protein S9 [Source:NCBI gene;Acc:109993705]	rps9	RPS9	10395.9	0.388846	0.0164612	0.324835
ENSLBEG00000023845	chromodomain helicase DNA binding protein 1 like [Source:NCBI gene;Acc:109983063]	chd1l	CHD1L	654.273	-0.379426	0.0164938	0.325094
ENSLBEG00000001670	growth arrest specific 2 like 1 [Source:NCBI gene;Acc:110000375]	gas2l1	GAS2L1	84.8343	0.608717	0.0165271	0.325139
ENSLBEG00000006753	glycolipid transfer protein [Source:NCBI gene;Acc:109995888]	gltpa	GLTP	104.463	-0.52269	0.0165479	0.325139
ENSLBEG00000027364	switching B cell complex subunit SWAP70 [Source:NCBI gene;Acc:109975428]	swap70a	SWAP70A	758.802	-0.501066	0.0166068	0.325139
ENSLBEG00000012807	sodium-dependent neutral amino acid transporter B(0)AT1-like [Source:NCBI gene;Acc:110006259]	0	#N/A	219.29	-0.967624	0.0166461	0.325139
ENSLBEG00000000794	kinesin family member 13A [Source:NCBI gene;Acc:109986449]	kif13a	KIF13A	59.8864	0.495534	0.0166467	0.325139
ENSLBEG00000020515	methenyltetrahydrofolate synthetase [Source:NCBI gene;Acc:109982313]	mthfs	MTHFS	558.211	0.434979	0.0166545	0.325139
ENSLBEG00000021424	chromatin target of PRMT1 protein-like [Source:NCBI gene;Acc:109976590]	CHTOP	CHTOP	14.0206	-1.54178	0.0166854	0.325139
ENSLBEG00000019272	salt inducible kinase 2 [Source:NCBI gene;Acc:109999247]	sik2b	SIK2	194.845	0.634972	0.0167071	0.325139
ENSLBEG00000020924	transmembrane protein 82-like [Source:NCBI gene;Acc:109990360]	0	#N/A	17.5957	0.973865	0.0167083	0.325139
ENSLBEG00000006431	protein FAM69A-like [Source:NCBI gene;Acc:109995861]	fam69aa	FAM69AA	121.412	-0.56055	0.0167308	0.325139
ENSLBEG00000022236	semaphorin 3E [Source:NCBI gene;Acc:109997838]	sema3e	SEMA3E	23.2988	-0.768761	0.0167439	0.325139
ENSLBEG00000019813	serine/threonine-protein kinase pim-1-like [Source:NCBI gene;Acc:109985122]	pim1	PIM1	507.831	0.761951	0.0167503	0.325139
ENSLBEG00000025091	desmoplakin-like [Source:NCBI gene;Acc:110000465]	wu:fi04e12	DSP	742.612	-0.666203	0.0167605	0.325139
ENSLBEG00000026396	cysteine rich transmembrane BMP regulator 1 [Source:NCBI gene;Acc:109981259]	0	#N/A	34.4898	0.740591	0.0167694	0.325139
ENSLBEG00000022804	TNF receptor superfamily member 11b [Source:NCBI gene;Acc:109984409]	TNFRSF11B	TNFRSF11B	379.105	-0.348192	0.016792	0.325198
ENSLBEG00000021222	cyclin-dependent kinase 4 inhibitor B-like [Source:NCBI gene;Acc:109994917]	0	#N/A	1196.6	-0.641553	0.016839	0.325265
ENSLBEG00000010614	dermatan sulfate epimerase [Source:NCBI gene;Acc:109986108]	dse	DSE	195.327	0.42547	0.0168522	0.325265
ENSLBEG00000020610	ALG5, dolichyl-phosphate beta-glucosyltransferase [Source:NCBI gene;Acc:109996144]	alg5	ALG5	448.993	-0.368596	0.016854	0.325265
ENSLBEG00000009776	Cas scaffold protein family member 4 [Source:NCBI gene;Acc:109994165]	cass4	CASS4	38.0893	0.851784	0.0169394	0.326035
ENSLBEG00000005964	RNA polymerase II elongation factor ELL-like [Source:NCBI gene;Acc:109990523]	ELL	ELL	79.4549	0.495989	0.0169831	0.326035
ENSLBEG00000003247	0	0	#N/A	157.053	-0.660127	0.0169881	0.326035
ENSLBEG00000028788	heparan-alpha-glucosaminide N-acetyltransferase [Source:NCBI gene;Acc:109992803]	hgsnat	HGSNAT	619.006	-0.307822	0.0170202	0.326035
ENSLBEG00000024640	prostaglandin E synthase [Source:NCBI gene;Acc:109984470]	ptges	PTGES	200.817	0.523862	0.017044	0.326035
ENSLBEG00000000121	nucleosome assembly protein 1 like 1 [Source:NCBI gene;Acc:109995710]	nap1l1	NAP1L1	1070.38	0.362715	0.0170489	0.326035
ENSLBEG00000003565	haloacid dehalogenase like hydrolase domain containing 5 [Source:NCBI gene;Acc:109989728]	hdhd5	HDHD5	65.0113	0.518282	0.0170637	0.326035
ENSLBEG00000025738	nuclear GTPase SLIP-GC-like [Source:NCBI gene;Acc:110003507]	0	#N/A	130.69	0.747402	0.017068	0.326035
ENSLBEG00000005355	exocyst complex component 3 like 4 [Source:NCBI gene;Acc:109995814]	exoc3l4	EXOC3L4	698.302	-0.313345	0.0170907	0.326035
ENSLBEG00000015843	ORM1-like protein 2 [Source:NCBI gene;Acc:109985285]	ormdl2	ORMDL2	185.943	0.299872	0.017103	0.326035
ENSLBEG00000024550	0	0	#N/A	100.812	0.475304	0.0171208	0.326035
ENSLBEG00000022209	uncharacterized protein C9orf40 homolog [Source:NCBI gene;Acc:109983355]	0	#N/A	19.2506	0.622401	0.0171288	0.326035
ENSLBEG00000010743	signal transducer and activator of transcription 1-alpha/beta-like [Source:NCBI gene;Acc:109994749]	stat1a	STAT1	323.524	0.401131	0.017219	0.327067
ENSLBEG00000012703	tRNA methyltransferase 1 [Source:NCBI gene;Acc:109991192]	trmt1	TRMT1	69.3078	0.414245	0.0172243	0.327067
ENSLBEG00000002586	ubiquitin like 3 [Source:NCBI gene;Acc:109991725]	ubl3a	UBL3	7858.47	-0.348204	0.0172516	0.327067
ENSLBEG00000011665	C-C chemokine receptor type 1-like [Source:NCBI gene;Acc:110001687]	ccr2	CCR5	47.2705	1.11513	0.0172616	0.327067
ENSLBEG00000012013	keratin, type II cytoskeletal 8-like [Source:NCBI gene;Acc:109981512]	krt8	KRT8	14058.7	0.841586	0.0173425	0.327871
ENSLBEG00000023235	TSC22 domain family protein 1-like [Source:NCBI gene;Acc:110002666]	TSC22D1	TSC22D1	400.278	-0.306682	0.0173434	0.327871
ENSLBEG00000002258	peptidylprolyl isomerase D [Source:NCBI gene;Acc:109999763]	ppid	PPID	209.797	0.687346	0.0174214	0.328972
ENSLBEG00000022210	mammalian ependymin-related protein 1-like [Source:NCBI gene;Acc:109999605]	epdr1	EPDR1	4.85514	1.5525	0.0174692	NA
ENSLBEG00000025521	protein FAM53B-like [Source:NCBI gene;Acc:109992208]	fam53b	FAM53B	789.372	-0.222476	0.0175082	0.330026
ENSLBEG00000010041	5'-3' exoribonuclease 2-like [Source:NCBI gene;Acc:110003733]	xrn2	XRN2	327.471	0.318386	0.0175334	0.330026
ENSLBEG00000014468	dual specificity protein phosphatase 2-like [Source:NCBI gene;Acc:109994208]	dusp2	DUSP2	293.053	-0.790211	0.017537	0.330026
ENSLBEG00000021823	TSR1, ribosome maturation factor [Source:NCBI gene;Acc:109998958]	tsr1	TSR1	171.411	0.581148	0.0175744	0.330026
ENSLBEG00000027019	sterile alpha and TIR motif containing 1 [Source:NCBI gene;Acc:109988008]	sarm1	SARM1	58.3087	0.813752	0.0175763	0.330026
ENSLBEG00000017163	0	0	#N/A	3705.82	0.321822	0.0176534	0.330794
ENSLBEG00000013172	ribosomal protein L35a [Source:NCBI gene;Acc:110005036]	rpl35a	RPL35A	10147.9	0.509602	0.0176569	0.330794
ENSLBEG00000014574	hydroxycarboxylic acid receptor 2-like [Source:NCBI gene;Acc:110002478]	HCAR2	HCAR2	139.461	0.991486	0.0176992	0.331214
ENSLBEG00000016976	interferon regulatory factor 4-like [Source:NCBI gene;Acc:109987022]	irf4a	IRF4	688.16	-0.42754	0.0177608	0.331813
ENSLBEG00000025682	tensin-3-like [Source:NCBI gene;Acc:110000566]	TNS3	TNS3	604.585	0.360345	0.0177876	0.331813
ENSLBEG00000008518	G protein nucleolar 2 [Source:NCBI gene;Acc:109983685]	gnl2	GNL2	703.274	0.852826	0.017791	0.331813
ENSLBEG00000023515	palmitoyltransferase ZDHHC3-like [Source:NCBI gene;Acc:109987445]	zdhhc3a	ZDHHC3	61.3466	0.465723	0.0178372	0.331854
ENSLBEG00000013408	0	0	#N/A	72.8077	-0.916291	0.0178569	0.331854
ENSLBEG00000009205	NK6 homeobox 2 [Source:NCBI gene;Acc:109989525]	nkx6.2	NKX6.2	14.9595	1.44132	0.0178668	0.331854
ENSLBEG00000014893	vasopressin V2 receptor-like [Source:NCBI gene;Acc:110001760]	avpr2aa	AVPR2	19.3361	1.04354	0.0178729	0.331854
ENSLBEG00000004375	ribosomal protein S7 [Source:NCBI gene;Acc:110000434]	rps7	RPS7	12974.2	0.369753	0.0179078	0.332131
ENSLBEG00000015018	cleavage and polyadenylation specificity factor subunit 3-like [Source:NCBI gene;Acc:109977913]	0	#N/A	21.4303	0.744451	0.0179915	0.332505
ENSLBEG00000014561	transducin like enhancer of split 4 [Source:NCBI gene;Acc:109997670]	TLE4	TLE4	190.246	-0.560914	0.0179958	0.332505
ENSLBEG00000019453	glutamine synthetase [Source:NCBI gene;Acc:109991436]	glula	GLUL	5063.07	-1.05185	0.0180132	0.332505
ENSLBEG00000007150	40S ribosomal protein S5 [Source:NCBI gene;Acc:110001587]	RPS5	RPS5	2099.91	0.442831	0.0180192	0.332505
ENSLBEG00000014034	ER membrane protein complex subunit 7 [Source:NCBI gene;Acc:109978671]	emc7	EMC7	438.834	0.266177	0.0180587	0.332505
ENSLBEG00000026217	sorcin [Source:NCBI gene;Acc:110000878]	SRI	SRI	1790.8	-0.365042	0.0180591	0.332505
ENSLBEG00000004090	40S ribosomal protein S17 [Source:NCBI gene;Acc:109995238]	RPS17	RPS17	7773.85	0.377996	0.0180687	0.332505
ENSLBEG00000020098	deoxyribonuclease-1-like 2 [Source:NCBI gene;Acc:110005319]	0	#N/A	111.731	-0.51798	0.0181036	0.332505
ENSLBEG00000024075	peroxisome proliferator-activated receptor gamma coactivator-related protein 1-like [Source:NCBI gene;Acc:110001314]	0	#N/A	188.818	0.699541	0.0181076	0.332505
ENSLBEG00000004143	pseudouridine synthase 3 [Source:NCBI gene;Acc:109999822]	pus3	PUS3	14.2381	1.03569	0.0181886	0.333604
ENSLBEG00000002547	uncharacterized LOC109998558 [Source:NCBI gene;Acc:109998558]	0	#N/A	302.199	-0.715597	0.0182203	0.333604
ENSLBEG00000002443	insulin like growth factor binding protein 6 [Source:NCBI gene;Acc:109999769]	igfbp6b	IGFBP6	164.952	0.592102	0.0182275	0.333604
ENSLBEG00000026088	E3 SUMO-protein ligase CBX4-like [Source:NCBI gene;Acc:109985836]	cbx4	CBX4	334.24	-0.33155	0.0182703	0.334019
ENSLBEG00000023097	MAPK regulated corepressor interacting protein 1 [Source:NCBI gene;Acc:109993853]	mcrip1	MCRIP1	467.718	-0.264276	0.0182971	0.334143
ENSLBEG00000025603	connexin 28.8 [Source:ZFIN;Acc:ZDB-GENE-050616-1]	cx28.8	GJB7	6.14713	1.21825	0.0183067	NA
ENSLBEG00000018470	endothelin receptor type A [Source:NCBI gene;Acc:109980543]	ednraa	EDNRA	215.276	0.544535	0.0183408	0.334188
ENSLBEG00000027004	dynein axonemal assembly factor 5 [Source:NCBI gene;Acc:109994525]	DNAAF5	DNAAF5	25.6329	0.579383	0.0183466	0.334188
ENSLBEG00000019046	BCL2, apoptosis regulator [Source:NCBI gene;Acc:109986688]	bcl2b	BCL2	238.503	0.486967	0.0183598	0.334188
ENSLBEG00000013948	pleckstrin homology domain-containing family O member 2-like [Source:NCBI gene;Acc:109999439]	plekho2	PLEKHO2	544.882	-0.4423	0.0184559	0.335211
ENSLBEG00000015463	WNK lysine deficient protein kinase 1b [Source:ZFIN;Acc:ZDB-GENE-030131-2656]	wnk1b	WNK1	59.6271	-0.614668	0.0184563	0.335211
ENSLBEG00000008903	phospholipase A2, minor isoenzyme-like [Source:NCBI gene;Acc:109982045]	pla2g1b	PLA2G1B	7.20228	1.61444	0.0184581	NA
ENSLBEG00000007639	phosphoenolpyruvate carboxykinase 1 [Source:NCBI gene;Acc:109999907]	pck1	PCK1	294.99	1.94394	0.0185182	0.335453
ENSLBEG00000018971	eukaryotic initiation factor 4A-I [Source:NCBI gene;Acc:109995527]	eif4a1b	EIF4A1	6154.76	0.245057	0.0185351	0.335453
ENSLBEG00000027439	nucleoside diphosphate kinase A2-like [Source:NCBI gene;Acc:109988995]	nme2a	NME2A	15787.6	0.332786	0.0185545	0.335453
ENSLBEG00000013668	ribosomal protein S15 [Source:NCBI gene;Acc:109991989]	rps15	RPS15	6184.39	0.395686	0.0185577	0.335453
ENSLBEG00000004181	diaphanous related formin 2 [Source:NCBI gene;Acc:109988857]	diaph2	DIAPH2	653.89	-0.29203	0.0185709	0.335453
ENSLBEG00000014675	SR-related CTD associated factor 4 [Source:NCBI gene;Acc:109988389]	scaf4a	SCAF4	574.104	-0.20344	0.0186259	0.335453
ENSLBEG00000008459	cytosolic thiouridylase subunit 1 [Source:NCBI gene;Acc:109982064]	ctu1	CTU1	59.9812	0.395913	0.0186357	0.335453
ENSLBEG00000021115	0	RF00067	RF00067	101.959	-2.05056	0.0186457	0.335453
ENSLBEG00000022530	RNA-binding protein 34-like [Source:NCBI gene;Acc:110005369]	0	#N/A	65.5406	0.515621	0.0186624	0.335453
ENSLBEG00000004267	arrestin domain-containing protein 3-like [Source:NCBI gene;Acc:110004307]	0	#N/A	229.726	-0.599486	0.018671	0.335453
ENSLBEG00000008386	protein-tyrosine sulfotransferase 1 [Source:NCBI gene;Acc:109995348]	tpst1	TPST1	250.814	0.32994	0.0187046	0.335695
ENSLBEG00000009669	structure specific recognition protein 1 [Source:NCBI gene;Acc:109993027]	ssrp1a	SSRP1	607.318	0.369291	0.0187276	0.335717
ENSLBEG00000020926	VIP peptides-like [Source:NCBI gene;Acc:109998335]	vipb	VIP	416.987	0.705983	0.0187581	0.335717
ENSLBEG00000001819	B cell CLL/lymphoma 3 [Source:HGNC Symbol;Acc:HGNC:998]	BCL3	BCL3	25.7926	0.887267	0.0187663	0.335717
ENSLBEG00000026978	transmembrane anterior posterior transformation protein 1 homolog [Source:NCBI gene;Acc:109994030]	tapt1b	TAPT1	311.605	-0.276901	0.0188115	0.336165
ENSLBEG00000016874	0	0	#N/A	6.83444	1.53147	0.0188354	NA
ENSLBEG00000028606	heat shock protein family A (Hsp70) member 14 [Source:NCBI gene;Acc:109987641]	hspa14	HSPA14	285.363	0.466406	0.018914	0.337324
ENSLBEG00000017475	low density lipoprotein receptor [Source:NCBI gene;Acc:110000662]	ldlra	LDLR	163.051	0.897466	0.0189169	0.337324
ENSLBEG00000023036	major facilitator superfamily domain containing 1 [Source:NCBI gene;Acc:109985760]	mfsd1	MFSD1	580.11	0.258757	0.0189394	0.337364
ENSLBEG00000016141	uncharacterized LOC109992046 [Source:NCBI gene;Acc:109992046]	rpz5	RPZ5	211.364	0.55465	0.0189688	0.337528
ENSLBEG00000027860	folate receptor beta [Source:NCBI gene;Acc:109989854]	zgc:165502	ZGC:165502	1190.52	0.644399	0.0190033	0.337664
ENSLBEG00000000105	intraflagellar transport protein 56 [Source:NCBI gene;Acc:109999710]	ttc26	TTC26	5.71912	1.36304	0.0190442	NA
ENSLBEG00000007652	0	0	#N/A	1742.62	-0.555562	0.0190564	0.337664
ENSLBEG00000006029	solute carrier family 6 member 20 [Source:NCBI gene;Acc:110002824]	SLC6A20	SLC6A20	1745.68	0.599949	0.0191124	0.337664
ENSLBEG00000002441	DDB1 and CUL4 associated factor 13 [Source:NCBI gene;Acc:109984221]	dcaf13	DCAF13	186.474	0.355514	0.0191127	0.337664
ENSLBEG00000009639	TIR domain containing adaptor protein [Source:NCBI gene;Acc:109995363]	tirap		319.575	-0.435928	0.019114	0.337664
ENSLBEG00000018987	eva-1 homolog A, regulator of programmed cell death [Source:NCBI gene;Acc:109989683]	0		43.897	0.859772	0.019124	0.337664
ENSLBEG00000026274	GTP cyclohydrolase I feedback regulator [Source:ZFIN;Acc:ZDB-GENE-040426-1731]	gchfr		186.476	1.42823	0.0191363	0.337664
ENSLBEG00000010736	SPRY domain-containing protein 4-like [Source:NCBI gene;Acc:109985321]	spryd4		36.5063	0.833492	0.0191387	0.337664
ENSLBEG00000023734	integrin alpha-M-like [Source:NCBI gene;Acc:109987430]	itgam		3986.69	-0.385173	0.0191777	0.337995
ENSLBEG00000028961	eukaryotic translation initiation factor 2 subunit 1 [Source:NCBI gene;Acc:109979756]	0		141.535	0.550135	0.0192189	0.338035
ENSLBEG00000020838	ubiquitin-associated protein 2-like [Source:NCBI gene;Acc:110003124]	ubap2b		895.086	0.249566	0.0192257	0.338035
ENSLBEG00000014796	zinc finger and BTB domain containing 18 [Source:NCBI gene;Acc:110002963]	zbtb18		307.942	-0.35229	0.0192751	0.338035
ENSLBEG00000015753	0	0		30.1346	-0.697203	0.0192832	0.338035
ENSLBEG00000004457	ATP citrate lyase [Source:NCBI gene;Acc:109983087]	aclya		1324.78	-0.995342	0.0192872	0.338035
ENSLBEG00000022973	platelet-activating factor acetylhydrolase-like [Source:NCBI gene;Acc:109982347]	pla2g7		692.879	-0.609186	0.0193192	0.338035
ENSLBEG00000027149	adrenomedullin [Source:NCBI gene;Acc:109975617]	adma		92.5481	0.778764	0.0193342	0.338035
ENSLBEG00000008775	NXPE family member 3-like [Source:NCBI gene;Acc:110004475]	0		17.9955	1.1806	0.0193463	0.338035
ENSLBEG00000013853	fatty acid desaturase 2 [Source:NCBI gene;Acc:109982230]	fads2		14.6769	-1.87371	0.0193794	0.338035
ENSLBEG00000026525	MICAL like 1 [Source:NCBI gene;Acc:109998452]	micall1a		188.786	0.514548	0.0193854	0.338035
ENSLBEG00000022414	LIM domain binding 2 [Source:NCBI gene;Acc:109994954]	ldb2a		31.2705	0.531942	0.0194247	0.338035
ENSLBEG00000013663	S-adenosylmethionine synthase-like [Source:NCBI gene;Acc:109996528]	mat2ab		132.105	0.506031	0.0194267	0.338035
ENSLBEG00000023523	prolyl endopeptidase like [Source:NCBI gene;Acc:109996206]	prepl	prepl	8.37734	1.20223	0.0194325	NA
ENSLBEG00000019584	galectin-3-like [Source:NCBI gene;Acc:110003091]	lgals3b		885.709	0.493726	0.0194441	0.338035
ENSLBEG00000003614	0	0		263.129	0.690761	0.0194641	0.338035
ENSLBEG00000021490	haloacid dehalogenase like hydrolase domain containing 2 [Source:NCBI gene;Acc:109986364]	hdhd2		90.3572	-0.346788	0.0195272	0.338299
ENSLBEG00000007327	arrestin domain-containing protein 3-like [Source:NCBI gene;Acc:110002080]	ARRDC3		259.887	-0.32004	0.0195361	0.338299
ENSLBEG00000016666	zinc finger protein 341 [Source:NCBI gene;Acc:109985588]	znf341		142.332	-0.420698	0.0195403	0.338299
ENSLBEG00000022917	coagulation factor XI-like [Source:NCBI gene;Acc:109990904]	0		9.56921	1.68734	0.0196583	0.339989
ENSLBEG00000021538	protein VPRBP-like [Source:NCBI gene;Acc:109976602]	0		11.7678	-0.920256	0.01968	0.339997
ENSLBEG00000000254	zinc-binding protein A33-like [Source:NCBI gene;Acc:110002140]	0		51.9666	-0.566748	0.0196996	0.339997
ENSLBEG00000008678	0	0		84.4665	0.844612	0.0197571	0.34004
ENSLBEG00000003251	tubulin alpha chain [Source:NCBI gene;Acc:109985350]	tuba8l3		498.186	0.342594	0.0197585	0.34004
ENSLBEG00000028212	insulin receptor substrate 1-B-like [Source:NCBI gene;Acc:109980706]	si:ch73-335l21.1		613.135	-0.469829	0.0197633	0.34004
ENSLBEG00000015364	chromosome unknown C12orf10 homolog [Source:NCBI gene;Acc:109986216]	myg1		237.219	0.399307	0.0197999	0.340317
ENSLBEG00000020567	0	0		20.5279	-1.00863	0.019909	0.340632
ENSLBEG00000024374	chemokine (C-C motif) receptor 12a [Source:ZFIN;Acc:ZDB-GENE-060503-97]	ccr12a		193.59	0.625164	0.0199164	0.340632
ENSLBEG00000017584	growth hormone receptor-like [Source:NCBI gene;Acc:109985685]	ghrb		263.545	0.729365	0.0199267	0.340632
ENSLBEG00000019664	coiled-coil domain containing 149 [Source:NCBI gene;Acc:109981625]	ccdc149a		89.4251	0.431123	0.0199337	0.340632
ENSLBEG00000025133	beta,beta-carotene 9',10'-oxygenase-like [Source:NCBI gene;Acc:109993291]	bco2a		134.361	-0.506945	0.0199376	0.340632
ENSLBEG00000026307	TRAF3 interacting protein 1 [Source:NCBI gene;Acc:109992240]	traf3ip1		247.391	0.279268	0.0199569	0.340632
ENSLBEG00000011985	histone deacetylase 10 [Source:NCBI gene;Acc:109993105]	hdac10		287.41	-0.371833	0.0199614	0.340632
ENSLBEG00000010067	TATA box binding protein (TBP)-associated factor, RNA polymerase I, A [Source:ZFIN;Acc:ZDB-GENE-041014-272]	taf1a		26.0227	0.789597	0.0200106	0.340768
ENSLBEG00000019366	0	0		135.603	-0.486876	0.0200148	0.340768
ENSLBEG00000025853	copine-1-like [Source:NCBI gene;Acc:109981763]	cpne1		3424.02	-0.282031	0.0200491	0.340768
ENSLBEG00000021411	phospholipid-transporting ATPase ID-like [Source:NCBI gene;Acc:109981669]	0		4562.08	-0.339149	0.0200687	0.340768
ENSLBEG00000002957	haptoglobin-like [Source:NCBI gene;Acc:109982979]	hp		14.9598	2.07088	0.0200774	0.340768
ENSLBEG00000027137	tripartite motif-containing protein 16-like [Source:NCBI gene;Acc:110001433]	TRIM16	TRIM16	71.9439	-0.805277	0.0200921	0.340768
ENSLBEG00000013001	0	0	0	6.52351	-2.77126	0.0201598	NA
ENSLBEG00000019163	acidic residue methyltransferase 1 [Source:NCBI gene;Acc:109983286]	armt1	armt1	207.513	-0.32785	0.0202065	0.341536
ENSLBEG00000013035	0	0	0	59.7576	0.526384	0.0202293	0.341536
ENSLBEG00000018763	0	0	0	89.8226	-0.852822	0.0202311	0.341536
ENSLBEG00000002260	0	0	0	13.424	2.25079	0.0202359	0.341536
ENSLBEG00000017607	DNA (cytosine-5-)-methyltransferase 3 alpha a [Source:ZFIN;Acc:ZDB-GENE-050314-5]	dnmt3aa	dnmt3aa	108.661	-0.667076	0.0202399	0.341536
ENSLBEG00000026004	RCC1 like [Source:NCBI gene;Acc:109993940]	rcc1l	rcc1l	55.9819	0.628129	0.0202951	0.34158
ENSLBEG00000000167	testis associated actin remodelling kinase 1 [Source:NCBI gene;Acc:109988770]	si:dkeyp-75h12.2	si:dkeyp-75h12.2	126.882	0.864592	0.0203151	0.34158
ENSLBEG00000028819	factor interacting with PAPOLA and CPSF1 [Source:NCBI gene;Acc:109992777]	fip1l1b	fip1l1b	438.859	0.255312	0.0203178	0.34158
ENSLBEG00000013673	synapse defective Rho GTPase homolog 2 [Source:NCBI gene;Acc:109983830]	SYDE2	SYDE2	212.039	-0.736573	0.0203246	0.34158
ENSLBEG00000007281	NOP2 nucleolar protein [Source:NCBI gene;Acc:110000478]	nop2	nop2	374.991	0.398882	0.0203928	0.342381
ENSLBEG00000009396	DnaJ heat shock protein family (Hsp40) member B6 [Source:NCBI gene;Acc:109997563]	dnajb6b	dnajb6b	3488.44	-0.41881	0.0204979	0.343619
ENSLBEG00000017535	anoctamin-9-like [Source:NCBI gene;Acc:110003477]	ano9a	ano9a	117.639	0.471822	0.0205078	0.343619
ENSLBEG00000011231	endoplasmic reticulum lectin 1 [Source:NCBI gene;Acc:109983216]	erlec1	erlec1	263.578	0.32377	0.0205531	0.343847
ENSLBEG00000014765	V-set and transmembrane domain containing 4a [Source:ZFIN;Acc:ZDB-GENE-060810-69]	vstm4a	vstm4a	41.4665	0.643826	0.0205628	0.343847
ENSLBEG00000007032	CD55 molecule (Cromer blood group) [Source:NCBI gene;Acc:109991191]	0	0	201.777	0.91786	0.0205941	0.343847
ENSLBEG00000003423	ribonuclease A family member 1, pancreatic [Source:NCBI gene;Acc:109978866]	0	0	292.901	-2.70635	0.020604	0.343847
ENSLBEG00000002347	stAR-related lipid transfer protein 13-like [Source:NCBI gene;Acc:109984744]	stard13b	stard13b	222.965	0.474837	0.0206279	0.343902
ENSLBEG00000017030	abhydrolase domain containing 10 [Source:NCBI gene;Acc:109992773]	tagln3b	tagln3b	224.34	0.389358	0.0206929	0.344481
ENSLBEG00000025001	enkurin domain containing 1 [Source:NCBI gene;Acc:109991595]	si:ch211-220d9.3	si:ch211-220d9.3	51.7829	2.15694	0.0207123	0.344481
ENSLBEG00000017474	low affinity vacuolar monovalent cation/H(+) antiporter-like [Source:NCBI gene;Acc:109977333]	VNX1	0	123.503	-0.659182	0.0207247	0.344481
ENSLBEG00000023712	tropomyosin alpha-3 chain-like [Source:NCBI gene;Acc:109998937]	tpm2	tpm2	330.911	-0.413192	0.0207536	0.344617
ENSLBEG00000000518	ribosomal protein S8 [Source:NCBI gene;Acc:110000900]	rps8a	rps8a	15187.5	0.359138	0.0208419	0.345198
ENSLBEG00000010866	diacylglycerol kinase zeta-like [Source:NCBI gene;Acc:110001119]	0	0	309.512	-0.308707	0.0208442	0.345198
ENSLBEG00000005932	signal-transducing adaptor protein 2-like [Source:NCBI gene;Acc:109998601]	0	0	857.783	-0.402161	0.0208507	0.345198
ENSLBEG00000016414	0	0	0	23.9881	-1.57809	0.0208809	0.345355
ENSLBEG00000015570	formin-like [Source:NCBI gene;Acc:109988409]	fmn1	fmn1	81.3983	0.7991	0.0209563	0.345517
ENSLBEG00000026734	0	0	0	35.0136	-0.900835	0.0209898	0.345517
ENSLBEG00000005136	ras-related protein Rab-40B-like [Source:NCBI gene;Acc:110004327]	rab40b	rab40b	32.7316	0.57011	0.0210099	0.345517
ENSLBEG00000023716	sphingosine-1-phosphate lyase 1 [Source:NCBI gene;Acc:109993227]	sgpl1	sgpl1	7906.53	-0.353347	0.021017	0.345517
ENSLBEG00000008525	zona pellucida sperm-binding protein 3-like [Source:NCBI gene;Acc:109990618]	0	0	10.0343	1.21251	0.02102	0.345517
ENSLBEG00000024802	RNA polymerase II subunit E [Source:NCBI gene;Acc:109997911]	polr2eb	polr2eb	188.439	0.283294	0.0210643	0.345517
ENSLBEG00000019937	ribosomal RNA processing 8 [Source:NCBI gene;Acc:110005982]	rrp8	rrp8	34.4384	0.761651	0.0210856	0.345517
ENSLBEG00000025787	secretin receptor-like [Source:NCBI gene;Acc:109997310]	0	0	60.0152	0.643002	0.0210864	0.345517
ENSLBEG00000026458	nuclear factor interleukin-3-regulated protein-like [Source:NCBI gene;Acc:109998456]	nfil3-5	nfil3-5	308.967	0.9482	0.0210919	0.345517
ENSLBEG00000019926	ribosomal protein L34 [Source:NCBI gene;Acc:109981618]	rpl34	rpl34	4387.19	0.461606	0.0210982	0.345517
ENSLBEG00000026295	flavin reductase (NADPH)-like [Source:NCBI gene;Acc:109991612]	0	0	628.949	-0.475767	0.021161	0.346205
ENSLBEG00000021926	engulfment and cell motility protein 2 [Source:NCBI gene;Acc:109990303]	elmo2	elmo2	109.682	0.548156	0.0212457	0.346874
ENSLBEG00000002768	inactive phospholipase C-like protein 2 [Source:NCBI gene;Acc:109988822]	plcl2	plcl2	125.448	-0.479003	0.0212953	0.346874
ENSLBEG00000016206	cationic amino acid transporter 2-like [Source:NCBI gene;Acc:109981094]	slc7a2	slc7a2	32.6489	0.94479	0.0212981	0.346874
ENSLBEG00000014066	Rab interacting lysosomal protein like 2 [Source:NCBI gene;Acc:109996540]	rilpl2	rilpl2	89.4822	-0.52586	0.0213003	0.346874
ENSLBEG00000025881	myotubularin related protein 10 [Source:NCBI gene;Acc:109975083]	mtmr10	mtmr10	1470.94	-0.277925	0.021306	0.346874
ENSLBEG00000005068	ephrin A4 [Source:NCBI gene;Acc:109989996]	0	0	637.404	-0.464446	0.0214031	0.347778
ENSLBEG00000027702	uncharacterized LOC109980707 [Source:NCBI gene;Acc:109980707]	zbtb4	zbtb4	120.842	-0.500504	0.0214211	0.347778
ENSLBEG00000016602	ribosome biogenesis regulator homolog [Source:NCBI gene;Acc:109993014]	0	0	161.092	0.58465	0.0214242	0.347778
ENSLBEG00000023466	0	0	0	19.7891	-0.795956	0.0214806	0.348046
ENSLBEG00000012876	importin subunit alpha-6 [Source:NCBI gene;Acc:110006261]	0	0	13.9774	1.22902	0.0215152	0.348046
ENSLBEG00000007545	5-hydroxyisourate hydrolase-like [Source:NCBI gene;Acc:109985050]	uraha	uraha	62.0526	1.81705	0.0215182	0.348046
ENSLBEG00000022796	ESF1 homolog [Source:NCBI gene;Acc:110005385]	esf1	esf1	16.3557	0.882807	0.0215243	0.348046
ENSLBEG00000026117	transmembrane protein 248 [Source:NCBI gene;Acc:109993952]	tmem248	tmem248	843.77	-0.250363	0.0215752	0.34853
ENSLBEG00000012674	phosphatidylinositol transfer protein cytoplasmic 1 [Source:NCBI gene;Acc:109989053]	PITPNC1	PITPNC1	94.445	-0.478415	0.0216413	0.34926
ENSLBEG00000011439	coiled-coil domain-containing protein 50-like [Source:NCBI gene;Acc:109985983]	ccdc187	ccdc187	196.437	-0.476764	0.0217985	0.351289
ENSLBEG00000012207	spalt-like transcription factor 1a [Source:ZFIN;Acc:ZDB-GENE-020228-2]	sall1a	sall1a	19.1817	0.999543	0.02183	0.351289
ENSLBEG00000005393	60S ribosomal protein L12-like [Source:NCBI gene;Acc:110001527]	rpl12	rpl12	5663.19	0.452676	0.0218707	0.351289
ENSLBEG00000028690	NFKB activating protein [Source:NCBI gene;Acc:109992689]	nkap	nkap	631.034	0.308034	0.0218718	0.351289
ENSLBEG00000012274	peroxisome proliferator-activated receptor gamma coactivator 1-beta-like [Source:NCBI gene;Acc:109986726]	ppargc1b	ppargc1b	95.933	-0.839506	0.0218725	0.351289
ENSLBEG00000013629	solute carrier family 10 member 1 [Source:NCBI gene;Acc:109978864]	slc10a1	slc10a1	340.377	-0.894356	0.0219521	0.351535
ENSLBEG00000007213	BCL2 like 11 [Source:NCBI gene;Acc:109987812]	0	0	139.908	-0.580163	0.0219637	0.351535
ENSLBEG00000004981	adrenoceptor alpha 1B [Source:NCBI gene;Acc:109993537]	adra1bb	adra1bb	9.45098	0.943138	0.0219722	0.351535
ENSLBEG00000014803	DNA damage inducible transcript 4 like [Source:NCBI gene;Acc:109991340]	DDIT4L	DDIT4L	138.884	-0.845576	0.0219723	0.351535
ENSLBEG00000006888	glutamine--fructose-6-phosphate aminotransferase [isomerizing] 2-like [Source:NCBI gene;Acc:109993508]	gfpt2	gfpt2	2588.42	-0.368802	0.0220711	0.352089
ENSLBEG00000004995	cadherin-related family member 5-like [Source:NCBI gene;Acc:109985994]	0	0	4621.81	-0.316505	0.0220831	0.352089
ENSLBEG00000021004	KIAA0100 ortholog [Source:NCBI gene;Acc:109999666]	si:ch211-259g3.4	si:ch211-259g3.4	589.976	-0.221377	0.022101	0.352089
ENSLBEG00000020085	family with sequence similarity 102 member B [Source:NCBI gene;Acc:109997160]	FAM102B	FAM102B	373.591	-0.282416	0.0221817	0.352089
ENSLBEG00000013834	MOB kinase activator 1A [Source:NCBI gene;Acc:109996530]	0	0	202.848	-0.395631	0.0221834	0.352089
ENSLBEG00000027055	transcription factor CP2-like protein 1 [Source:NCBI gene;Acc:109983504]	tfcp2l1	tfcp2l1	23.4455	1.28676	0.0221908	0.352089
ENSLBEG00000000744	hypoxia inducible factor 1 subunit alpha inhibitor [Source:NCBI gene;Acc:109981929]	hif1an	hif1an	250.681	-0.63555	0.0222085	0.352089
ENSLBEG00000015401	RNA polymerase I subunit A [Source:NCBI gene;Acc:109984290]	polr1a	polr1a	361.989	0.426938	0.0222149	0.352089
ENSLBEG00000005657	ubiquitin-conjugating enzyme E2 R2-like [Source:NCBI gene;Acc:109987786]	cdc34a	cdc34a	501.365	-0.31032	0.0222301	0.352089
ENSLBEG00000011907	ribosome production factor 2 homolog [Source:NCBI gene;Acc:109986122]	rpf2	rpf2	384.786	0.580203	0.0222321	0.352089
ENSLBEG00000015644	eukaryotic translation elongation factor 1 beta 2 [Source:NCBI gene;Acc:110002501]	eef1b2	eef1b2	3560.27	0.806773	0.0223502	0.352089
ENSLBEG00000024002	polyadenylate-binding protein 1-like [Source:NCBI gene;Acc:109987428]	0	0	8628.9	0.304727	0.0223588	0.352089
ENSLBEG00000020727	0	0	0	149.346	-0.798126	0.0223625	0.352089
ENSLBEG00000009951	potassium two pore domain channel subfamily K member 3 [Source:NCBI gene;Acc:109978778]	kcnk3a	kcnk3a	62.2163	0.612139	0.0223664	0.352089
ENSLBEG00000023165	molybdenum cofactor sulfurase [Source:NCBI gene;Acc:109993250]	MOCOS	MOCOS	963.275	-0.268872	0.0223811	0.352089
ENSLBEG00000027834	PDZ domain containing 8 [Source:NCBI gene;Acc:109976599]	pdzd8	pdzd8	446.079	-0.287079	0.0224001	0.352089
ENSLBEG00000012022	transcription factor Sox-18B-like [Source:NCBI gene;Acc:110000569]	0	0	106.127	0.691593	0.0224605	0.352089
ENSLBEG00000023875	L-lactate dehydrogenase B chain [Source:NCBI gene;Acc:109992161]	0	0	1104.65	0.664212	0.0224667	0.352089
ENSLBEG00000024969	MAGUK p55 subfamily member 5-A-like [Source:NCBI gene;Acc:110000297]	MPP5	MPP5	1183.87	-0.24105	0.0224686	0.352089
ENSLBEG00000025776	gem nuclear organelle associated protein 6 [Source:NCBI gene;Acc:110001386]	gemin6	gemin6	30.771	0.710339	0.022477	0.352089
ENSLBEG00000026093	nephrocystin 3 [Source:NCBI gene;Acc:109997319]	nphp3	nphp3	55.09	0.480142	0.0224844	0.352089
ENSLBEG00000002433	nuclear receptor subfamily 4 group A member 3 [Source:NCBI gene;Acc:109997416]	nr4a3	nr4a3	204.476	-0.478674	0.0224891	0.352089
ENSLBEG00000007287	fibroblast growth factor receptor 1-A-like [Source:NCBI gene;Acc:109982009]	FGFR1	FGFR1	638.24	0.378037	0.0224987	0.352089
ENSLBEG00000021910	0	0	0	347.791	-1.1194	0.0225208	0.352089
ENSLBEG00000004314	LDL receptor related protein 2 [Source:NCBI gene;Acc:109991788]	lrp2a	lrp2a	11.3507	1.58621	0.0225534	0.352089
ENSLBEG00000020326	hedgehog acyltransferase [Source:NCBI gene;Acc:109998326]	hhat	hhat	11.8214	0.850234	0.0225872	0.352089
ENSLBEG00000021607	ephrin type-A receptor 5-like [Source:NCBI gene;Acc:109986311]	0	0	94.5086	-0.472835	0.0226025	0.352089
ENSLBEG00000006388	periodic tryptophan protein 2 homolog [Source:NCBI gene;Acc:109984156]	pwp2h	pwp2h	190.805	0.490319	0.0226121	0.352089
ENSLBEG00000008318	anoctamin-10-like [Source:NCBI gene;Acc:109991868]	ano10b	ano10b	25.4779	0.607535	0.0226199	0.352089
ENSLBEG00000015366	0	0	0	6.82879	1.29512	0.0226433	NA
ENSLBEG00000027397	2-acylglycerol O-acyltransferase 2-A-like [Source:NCBI gene;Acc:110002816]	mogat3a	mogat3a	77.2337	0.481243	0.022708	0.352523
ENSLBEG00000016020	visinin-like [Source:NCBI gene;Acc:109993675]	rcvrn2	rcvrn2	15.9675	-0.754473	0.0227186	0.352523
ENSLBEG00000022435	protein FAM53B-like [Source:NCBI gene;Acc:109987925]	0	0	572.804	-0.353193	0.0227283	0.352523
ENSLBEG00000011413	alkaline ceramidase 3 [Source:NCBI gene;Acc:109982130]	acer3	acer3	1515.25	-0.479015	0.022749	0.352523
ENSLBEG00000000405	0	0	0	35.8879	-1.00717	0.0227537	0.352523
ENSLBEG00000018932	erb-b2 receptor tyrosine kinase 3 [Source:NCBI gene;Acc:109993754]	erbb3a	erbb3a	4625.96	-0.305462	0.0228243	0.352788
ENSLBEG00000026832	0	0	0	27.7724	1.29318	0.0228284	0.352788
ENSLBEG00000023253	transmembrane protein 184A [Source:NCBI gene;Acc:109990380]	tmem184a	tmem184a	1989.34	-0.33113	0.0228654	0.352788
ENSLBEG00000007638	mitochondrial ribosomal protein L11 [Source:NCBI gene;Acc:109985475]	mrpl11	mrpl11	139.034	0.515496	0.0228748	0.352788
ENSLBEG00000023777	ski oncogene-like [Source:NCBI gene;Acc:109980660]	skib	skib	58.5898	0.575045	0.0228813	0.352788
ENSLBEG00000025570	REX4 homolog, 3'-5' exonuclease [Source:NCBI gene;Acc:109988486]	rexo4	rexo4	108.16	0.44866	0.0228979	0.352788
ENSLBEG00000027023	multidrug resistance-associated protein 1-like [Source:NCBI gene;Acc:109998446]	abcc6a	abcc6a	13.6379	-0.78057	0.0229837	0.353551
ENSLBEG00000003426	tight junction protein ZO-2-like [Source:NCBI gene;Acc:109989415]	tjp2b	tjp2b	84.578	-0.488384	0.0229898	0.353551
ENSLBEG00000021606	C-X-C chemokine receptor type 3-2-like [Source:NCBI gene;Acc:110001247]	cxcr3.2	cxcr3.2	211.502	0.553578	0.0230588	0.353737
ENSLBEG00000025909	kelch repeat and BTB domain containing 8 [Source:NCBI gene;Acc:109983410]	kbtbd8	kbtbd8	325.298	-0.229585	0.0230688	0.353737
ENSLBEG00000012793	lysosomal associated membrane protein 1 [Source:NCBI gene;Acc:109985520]	LAMP1	LAMP1	77.2727	-0.639837	0.0230839	0.353737
ENSLBEG00000005372	0	RF01684	RF01684	24.9978	-0.774024	0.0230869	0.353737
ENSLBEG00000024508	ATPase family, AAA domain containing 2B [Source:NCBI gene;Acc:109989754]	atad2b	atad2b	107.083	-0.499227	0.0231378	0.353844
ENSLBEG00000024841	AP-3 complex subunit mu-2 [Source:NCBI gene;Acc:109999695]	ap3m2	ap3m2	544.5	-0.266684	0.0231526	0.353844
ENSLBEG00000004536	kidney mitochondrial carrier protein 1-like [Source:NCBI gene;Acc:110002341]	0	0	1128.81	-0.244171	0.0231956	0.353844
ENSLBEG00000012501	kelch repeat and BTB domain-containing protein 11-like [Source:NCBI gene;Acc:110001143]	kbtbd11	kbtbd11	13.8207	0.956466	0.0232055	0.353844
ENSLBEG00000002014	PIN2 (TERF1) interacting telomerase inhibitor 1 [Source:NCBI gene;Acc:109987698]	pinx1	pinx1	192.804	0.354311	0.0232064	0.353844
ENSLBEG00000010428	zinc finger protein 708-like [Source:NCBI gene;Acc:109996437]	0	0	102.957	-0.499122	0.0232213	0.353844
ENSLBEG00000007571	5-aminolevulinate synthase, nonspecific, mitochondrial-like [Source:NCBI gene;Acc:109980989]	0	0	11.3664	1.26445	0.0232799	0.354412
ENSLBEG00000019763	dual specificity testis-specific protein kinase 2-like [Source:NCBI gene;Acc:109986872]	si:ch211-113e8.3	si:ch211-113e8.3	9.16408	1.08252	0.023317	NA
ENSLBEG00000000071	carboxypeptidase E [Source:NCBI gene;Acc:109994025]	cpe	cpe	256.814	0.364141	0.023376	0.355453
ENSLBEG00000028640	0	0	0	404.521	-1.39128	0.0234272	0.355453
ENSLBEG00000026648	formin-like [Source:NCBI gene;Acc:109981309]	FMN1	FMN1	60.8079	-0.399567	0.0234318	0.355453
ENSLBEG00000003360	epithelial splicing regulatory protein 1 [Source:NCBI gene;Acc:109997437]	esrp1	esrp1	252.83	0.428034	0.0234409	0.355453
ENSLBEG00000023650	0	0	0	23.7311	-0.84466	0.023455	0.355453
ENSLBEG00000014441	0	0	0	289.994	-0.824751	0.0234789	0.355491
ENSLBEG00000021569	FRY like transcription coactivator [Source:NCBI gene;Acc:109981794]	fryl	fryl	370.9	-0.343434	0.0235792	0.356506
ENSLBEG00000025557	sorting nexin 29 [Source:NCBI gene;Acc:109990427]	snx29	snx29	461.181	-0.494664	0.0236208	0.356506
ENSLBEG00000020481	toll like receptor 8 [Source:HGNC Symbol;Acc:HGNC:15632]	TLR8	TLR8	336.891	-0.494191	0.0236251	0.356506
ENSLBEG00000025168	ubiquitin-protein ligase E3A-like [Source:NCBI gene;Acc:109982581]	0	0	352.364	-0.298048	0.0236315	0.356506
ENSLBEG00000009537	transcription factor 7 like 2 [Source:NCBI gene;Acc:109997573]	tcf7l2	tcf7l2	1753.97	-0.355341	0.0236738	0.356821
ENSLBEG00000018123	BRX1, biogenesis of ribosomes [Source:NCBI gene;Acc:109990795]	bxdc2	bxdc2	97.9997	0.671991	0.0237164	0.35714
ENSLBEG00000028803	lysine-specific demethylase 4C-like [Source:NCBI gene;Acc:109992790]	kdm4c	kdm4c	474.7	-0.237557	0.0237749	0.357236
ENSLBEG00000013757	WD repeat domain 3 [Source:NCBI gene;Acc:109982659]	wdr3	wdr3	127.561	0.718351	0.0238178	0.357236
ENSLBEG00000022931	0	0	0	20.6651	-0.833348	0.0238549	0.357236
ENSLBEG00000024546	protein phosphatase 4 regulatory subunit 4 [Source:NCBI gene;Acc:110003391]	ppp4r4	ppp4r4	5.06411	1.26198	0.0238582	NA
ENSLBEG00000027741	coiled-coil domain containing 88A [Source:NCBI gene;Acc:109997360]	CCDC88A	CCDC88A	31.5429	-0.748791	0.0238696	0.357236
ENSLBEG00000006536	secretogranin III [Source:NCBI gene;Acc:109989454]	scg3	scg3	787.645	0.467179	0.0238877	0.357236
ENSLBEG00000000391	0	0	0	190.993	-0.414884	0.0238885	0.357236
ENSLBEG00000007402	CCM2 like scaffold protein [Source:NCBI gene;Acc:110001599]	ccm2l	ccm2l	57.2955	0.507459	0.0238893	0.357236
ENSLBEG00000024426	tubulin beta-4B chain-like [Source:NCBI gene;Acc:109989212]	zgc:153426	zgc:153426	42.2363	0.67071	0.0238944	0.357236
ENSLBEG00000002650	malate dehydrogenase 1 [Source:NCBI gene;Acc:109988212]	mdh1aa	mdh1aa	6919.48	0.887391	0.0240106	0.357976
ENSLBEG00000010924	neurochondrin [Source:NCBI gene;Acc:109999963]	ncdn	ncdn	213.769	0.511253	0.0240184	0.357976
ENSLBEG00000007116	hepatocyte nuclear factor 4-gamma-like [Source:NCBI gene;Acc:109981981]	hnf4g	hnf4g	1440.58	-0.395851	0.0240275	0.357976
ENSLBEG00000025487	trio Rho guanine nucleotide exchange factor [Source:NCBI gene;Acc:109990888]	trioa	trioa	184.76	-0.365672	0.0240299	0.357976
ENSLBEG00000028028	ADP ribosylation factor like GTPase 4A [Source:HGNC Symbol;Acc:HGNC:695]	ARL4A	ARL4A	37.8357	0.723061	0.0240654	0.358179
ENSLBEG00000005265	unconventional myosin-VIIa-like [Source:NCBI gene;Acc:109995422]	0	0	2888.22	-0.434904	0.0240905	0.358179
ENSLBEG00000024571	lactose-binding lectin l-2-like [Source:NCBI gene;Acc:109982403]	0	0	9312.2	-1.02004	0.024108	0.358179
ENSLBEG00000000541	ribosomal protein S27a [Source:NCBI gene;Acc:109976993]	rps27a	rps27a	13167.7	0.318288	0.0241631	0.358677
ENSLBEG00000026826	peptidase, mitochondrial processing beta subunit [Source:NCBI gene;Acc:109993974]	pmpcb	pmpcb	229.855	0.434005	0.0242201	0.359112
ENSLBEG00000011146	ATP binding cassette subfamily F member 3 [Source:NCBI gene;Acc:110001679]	abcf3	abcf3	379.883	0.302241	0.0242355	0.359112
ENSLBEG00000012170	PTPRF interacting protein alpha 4 [Source:NCBI gene;Acc:109984220]	ppfia4	ppfia4	8.85986	0.968247	0.0242716	NA
ENSLBEG00000004302	sesquipedalian-1-like [Source:NCBI gene;Acc:109992938]	zgc:153733	zgc:153733	48.7504	-0.846215	0.0243944	0.361145
ENSLBEG00000016147	0	0	0	13.7851	1.5254	0.0244987	0.362367
ENSLBEG00000005084	Golgi reassembly-stacking protein 2-like [Source:NCBI gene;Acc:109995836]	gorasp2	gorasp2	169.799	0.353284	0.0245445	0.362722
ENSLBEG00000001253	SPARC (osteonectin), cwcv and kazal like domains proteoglycan 1 [Source:NCBI gene;Acc:109990493]	spock1	spock1	19.0769	0.76824	0.0246447	0.36388
ENSLBEG00000022870	0	0	0	328.506	-0.7092	0.0247186	0.364217
ENSLBEG00000018890	ATP binding cassette subfamily E member 1 [Source:NCBI gene;Acc:110001846]	abce1	abce1	528.402	0.698887	0.024719	0.364217
ENSLBEG00000012666	LMBR1 domain containing 1 [Source:NCBI gene;Acc:109983215]	lmbrd1	lmbrd1	650.191	-0.230229	0.0247464	0.364217
ENSLBEG00000026230	FYVE, RhoGEF and PH domain-containing protein 5-like [Source:NCBI gene;Acc:109983417]	fgd5a	fgd5a	191.372	0.532587	0.0247549	0.364217
ENSLBEG00000009794	uncharacterized LOC109984941 [Source:NCBI gene;Acc:109984941]	zgc:174906	zgc:174906	219.887	-0.305347	0.0247787	0.364244
ENSLBEG00000001455	cyclin dependent kinase 5 [Source:NCBI gene;Acc:109995722]	cdk5	cdk5	102.12	-0.420081	0.0248103	0.364388
ENSLBEG00000000017	0	0	0	5.84305	-1.37335	0.0248995	NA
ENSLBEG00000005259	interleukin-12 receptor subunit beta-2-like [Source:NCBI gene;Acc:109998595]	il12rb2	il12rb2	268.71	-0.4168	0.0249439	0.366026
ENSLBEG00000004879	SET domain containing 6 [Source:NCBI gene;Acc:109988867]	setd6	setd6	160.104	0.463662	0.0250503	0.366881
ENSLBEG00000019268	metastasis associated 1 family member 2 [Source:NCBI gene;Acc:109995531]	0	0	1394.63	-0.230859	0.025076	0.366881
ENSLBEG00000001763	heat-stable enterotoxin receptor-like [Source:NCBI gene;Acc:109992272]	si:ch73-139e5.4	si:ch73-139e5.4	4144	-0.348838	0.0251073	0.366881
ENSLBEG00000009780	protein tyrosine kinase 6 [Source:NCBI gene;Acc:110000522]	ptk6b	ptk6b	1294.42	-0.464795	0.0251342	0.366881
ENSLBEG00000019352	aminoadipate-semialdehyde dehydrogenase-phosphopantetheinyl transferase [Source:NCBI gene;Acc:109988484]	aasdhppt	aasdhppt	97.3655	0.614471	0.0251413	0.366881
ENSLBEG00000011964	si:ch211-215k15.4 [Source:ZFIN;Acc:ZDB-GENE-131127-215]	si:ch211-215k15.4	si:ch211-215k15.4	8.47152	-1.83497	0.0251496	NA
ENSLBEG00000010523	mitochondrial ribosomal protein L10 [Source:NCBI gene;Acc:109995917]	mrpl10	mrpl10	265.491	0.439218	0.0251546	0.366881
ENSLBEG00000016234	cutC copper transporter [Source:NCBI gene;Acc:109990722]	cutc	cutc	1745.62	-0.282494	0.0251563	0.366881
ENSLBEG00000011162	RRAD, Ras related glycolysis inhibitor and calcium channel regulator [Source:NCBI gene;Acc:109998132]	rrad	rrad	246.158	0.696211	0.0252117	0.366986
ENSLBEG00000019109	vesicle-trafficking protein SEC22b-B-like [Source:NCBI gene;Acc:109982780]	sec22bb	sec22bb	114.268	0.397133	0.02522	0.366986
ENSLBEG00000013076	0	0	0	71.6953	2.26013	0.025241	0.366986
ENSLBEG00000018693	protein-glutamine gamma-glutamyltransferase 2-like [Source:NCBI gene;Acc:109998288]	tgm2l	tgm2l	31.8956	0.905035	0.0252517	0.366986
ENSLBEG00000019198	0	0	0	40.934	1.17252	0.025305	0.367069
ENSLBEG00000028248	kelch domain-containing protein 1-like [Source:NCBI gene;Acc:109981855]	0	0	17.2706	-1.37341	0.0253385	0.367069
ENSLBEG00000014377	EEF1A lysine methyltransferase 1 [Source:NCBI gene;Acc:109982628]	eef1akmt1	eef1akmt1	43.1104	0.505601	0.0253491	0.367069
ENSLBEG00000002952	thymidine phosphorylase [Source:HGNC Symbol;Acc:HGNC:3148]	TYMP	TYMP	60.0692	1.23397	0.025387	0.367069
ENSLBEG00000022486	probable nuclear hormone receptor HR38 [Source:NCBI gene;Acc:109990324]	NR4A1	NR4A1	483.042	-0.673104	0.0253918	0.367069
ENSLBEG00000003738	carboxypeptidase O-like [Source:NCBI gene;Acc:109984131]	0	0	946.1	-0.584148	0.0254125	0.367069
ENSLBEG00000007313	si:dkey-183n20.15 [Source:ZFIN;Acc:ZDB-GENE-041001-160]	si:dkey-183n20.15	si:dkey-183n20.15	174.259	-0.880608	0.025433	0.367069
ENSLBEG00000013460	C-type lectin domain family 10 member A-like [Source:NCBI gene;Acc:110001728]	0	0	231.167	0.752044	0.0254352	0.367069
ENSLBEG00000020318	granzyme B-like [Source:NCBI gene;Acc:109987366]	0	0	23.0772	-0.760953	0.0255012	0.367069
ENSLBEG00000020348	cholesterol 25-hydroxylase [Source:NCBI gene;Acc:110001887]	ch25h	ch25h	31.7619	0.947148	0.0255112	0.367069
ENSLBEG00000004587	NOP10 ribonucleoprotein homolog (yeast) [Source:ZFIN;Acc:ZDB-GENE-041007-4]	nop10	nop10	105.913	0.563128	0.0255349	0.367069
ENSLBEG00000006775	calcitonin gene-related peptide type 1 receptor-like [Source:NCBI gene;Acc:109984139]	0	0	42.7177	0.742849	0.0255565	0.367069
ENSLBEG00000017165	alanine aminotransferase 2-like [Source:NCBI gene;Acc:109984998]	gpt2l	gpt2l	2798.36	-0.249935	0.0255902	0.367069
ENSLBEG00000023689	0	0	0	150.406	0.338667	0.0256156	0.367069
ENSLBEG00000007261	nuclear factor interleukin-3-regulated protein-like [Source:NCBI gene;Acc:109996404]	nfil3-6	nfil3-6	159.323	0.734533	0.0256247	0.367069
ENSLBEG00000008883	endonuclease domain-containing 1 protein-like [Source:NCBI gene;Acc:109996417]	0	0	37.2127	0.958439	0.0256443	0.367069
ENSLBEG00000004657	SH2 domain-containing protein 1A-like [Source:NCBI gene;Acc:109996286]	0	0	42.4452	-0.700615	0.0256507	0.367069
ENSLBEG00000008945	HPS4, biogenesis of lysosomal organelles complex 3 subunit 2 [Source:NCBI gene;Acc:109982010]	hps4	hps4	140.894	0.340894	0.0257173	0.367069
ENSLBEG00000015689	granzyme A-like [Source:NCBI gene;Acc:109997685]	0	0	102.654	-0.989814	0.0257304	0.367069
ENSLBEG00000018186	plasma membrane calcium-transporting ATPase 1-like [Source:NCBI gene;Acc:109998336]	0	0	423.774	0.289764	0.0257443	0.367069
ENSLBEG00000001980	vesicle associated membrane protein 2 [Source:NCBI gene;Acc:109991025]	vamp2	vamp2	17.8596	0.789764	0.0257452	0.367069
ENSLBEG00000011058	kinesin family member 21B [Source:NCBI gene;Acc:109984219]	kif21b	kif21b	138.932	-0.46852	0.0257609	0.367069
ENSLBEG00000019574	Golgi phosphoprotein 3-like [Source:NCBI gene;Acc:109997145]	si:dkey-27b3.2	si:dkey-27b3.2	1489.72	-0.298248	0.0257642	0.367069
ENSLBEG00000003957	RNA terminal phosphate cyclase like 1 [Source:NCBI gene;Acc:109987108]	rcl1	rcl1	242.578	0.490011	0.0258097	0.36732
ENSLBEG00000007593	acetyl-CoA carboxylase alpha [Source:NCBI gene;Acc:109981408]	ACACA	ACACA	156.069	0.741865	0.025826	0.36732
ENSLBEG00000003936	ETS domain-containing transcription factor ERF-like [Source:NCBI gene;Acc:109994065]	erf	erf	169.932	-0.889442	0.0259176	0.368308
ENSLBEG00000023299	MAF bZIP transcription factor K [Source:NCBI gene;Acc:109990395]	mafk	mafk	17.2023	1.1188	0.0259816	0.368481
ENSLBEG00000021173	protein BTG1-like [Source:NCBI gene;Acc:109994401]	btg1	btg1	2995.94	-0.436508	0.0259837	0.368481
ENSLBEG00000020493	WD repeat domain 36 [Source:NCBI gene;Acc:109986340]	wdr36	wdr36	132.167	0.54186	0.0260165	0.368481
ENSLBEG00000014272	ankyrin repeat domain-containing protein 33B-like [Source:NCBI gene;Acc:110000594]	ankrd33ba	ankrd33ba	42.7624	0.694781	0.0260406	0.368481
ENSLBEG00000008056	AFG3-like protein 1 [Source:NCBI gene;Acc:109983741]	0	0	85.6049	-0.535803	0.026064	0.368481
ENSLBEG00000021419	GTP binding protein 4 [Source:NCBI gene;Acc:109999619]	gtpbp4	gtpbp4	1380.16	0.632976	0.0260827	0.368481
ENSLBEG00000016747	myotubularin-related protein 4-like [Source:NCBI gene;Acc:109996024]	0	0	500.266	-0.259943	0.0261066	0.368481
ENSLBEG00000026561	0	0	0	49.0517	-0.543252	0.0261067	0.368481
ENSLBEG00000006789	pleckstrin homology and RhoGEF domain containing G6 [Source:NCBI gene;Acc:110000485]	plekhg6	plekhg6	115.407	-0.55554	0.0261586	0.368635
ENSLBEG00000022271	MIA SH3 domain ER export factor 2 [Source:NCBI gene;Acc:109990852]	0	0	2663.78	-0.347411	0.0261769	0.368635
ENSLBEG00000000481	thioredoxin-like [Source:NCBI gene;Acc:109988736]	0	0	1395.78	0.425065	0.0261873	0.368635
ENSLBEG00000006623	RNA polymerase II associated protein 2 [Source:NCBI gene;Acc:109995603]	rpap2	rpap2	99.3405	0.378087	0.0262062	0.368635
ENSLBEG00000005125	calcium-binding mitochondrial carrier protein SCaMC-1-like [Source:NCBI gene;Acc:110000442]	0	0	90.7268	0.439194	0.0262652	0.369153
ENSLBEG00000002143	eukaryotic translation initiation factor 3 subunit M [Source:NCBI gene;Acc:109985708]	eif3m	eif3m	3500.19	0.447713	0.0263106	0.369198
ENSLBEG00000015657	translocase of inner mitochondrial membrane 22 [Source:NCBI gene;Acc:109996028]	TIMM22	TIMM22	117.823	0.395137	0.0263127	0.369198
ENSLBEG00000018678	nuclear receptor subfamily 3 group C member 2 [Source:NCBI gene;Acc:109980416]	nr3c2	nr3c2	186.33	-0.359163	0.0263483	0.369386
ENSLBEG00000022873	family with sequence similarity 49 member A [Source:NCBI gene;Acc:109982333]	fam49a	fam49a	402.896	-0.262042	0.0264183	0.369494
ENSLBEG00000012471	importin 9 [Source:NCBI gene;Acc:109986231]	ipo9	ipo9	298.997	0.400421	0.0264187	0.369494
ENSLBEG00000023897	nitric oxide associated 1 [Source:NCBI gene;Acc:110000281]	noa1	noa1	16.8237	0.801676	0.0264313	0.369494
ENSLBEG00000009472	sodium channel protein type 2 subunit alpha-like [Source:NCBI gene;Acc:109992374]	scn1lab	scn1lab	18.9565	0.890136	0.0264597	0.369494
ENSLBEG00000010846	myelin-associated glycoprotein-like [Source:NCBI gene;Acc:109986663]	0	0	201.651	-0.998155	0.0264869	0.369494
ENSLBEG00000016960	0	0	0	185.21	0.447159	0.0264891	0.369494
ENSLBEG00000001176	elongation factor 2 [Source:NCBI gene;Acc:109984051]	eef2b	eef2b	483.197	0.821932	0.0265379	0.369768
ENSLBEG00000019090	bcl-2-related ovarian killer protein homolog B-like [Source:NCBI gene;Acc:109991453]	bokb	bokb	151.107	0.651205	0.0265721	0.369768
ENSLBEG00000017738	zinc transporter ZIP14-like [Source:NCBI gene;Acc:109989132]	slc39a14	slc39a14	278.405	0.285538	0.0265753	0.369768
ENSLBEG00000013815	betaine--homocysteine S-methyltransferase 1-like [Source:NCBI gene;Acc:109994230]	0	0	1155.71	1.33338	0.0266416	0.370099
ENSLBEG00000028620	diphosphoinositol polyphosphate phosphohydrolase 3-beta-like [Source:NCBI gene;Acc:109987642]	0	0	72.6303	0.839397	0.0267095	0.370099
ENSLBEG00000002853	PNN interacting serine and arginine rich protein [Source:NCBI gene;Acc:109983983]	pnisr	pnisr	1520.3	0.306806	0.0267128	0.370099
ENSLBEG00000000824	src-like-adapter [Source:NCBI gene;Acc:109982395]	sla1	sla1	1019.35	-0.327327	0.0267213	0.370099
ENSLBEG00000014542	angiotensin I converting enzyme [Source:NCBI gene;Acc:109997047]	ace	ace	6503.4	-0.556098	0.0267352	0.370099
ENSLBEG00000013881	transforming acidic coiled-coil containing protein 1 [Source:NCBI gene;Acc:109995995]	0	0	1440.26	-0.297949	0.0267389	0.370099
ENSLBEG00000025799	leucine-rich repeat-containing protein 32-like [Source:NCBI gene;Acc:109993958]	lrrc32	lrrc32	351.866	0.51839	0.0267579	0.370099
ENSLBEG00000002341	elongation factor 1 homolog [Source:NCBI gene;Acc:109993451]	0	0	383.136	0.29095	0.0267769	0.370099
ENSLBEG00000026933	NudC domain containing 2 [Source:NCBI gene;Acc:109994518]	nudcd2	nudcd2	155.043	-0.315871	0.0268288	0.370409
ENSLBEG00000011174	0	0	0	1557.14	-0.48018	0.0268438	0.370409
ENSLBEG00000025607	UTP18, small subunit processome component [Source:NCBI gene;Acc:109989316]	0	0	119.853	0.60649	0.0268811	0.370462
ENSLBEG00000009022	coagulation factor X-like [Source:NCBI gene;Acc:110004484]	0	0	7.72394	1.207	0.0268831	NA
ENSLBEG00000024220	transcription factor BTF3-like [Source:NCBI gene;Acc:109991578]	BTF3	BTF3	4683.06	0.420199	0.0269073	0.370462
ENSLBEG00000010395	ubiquitin-conjugating enzyme E2 L3-like [Source:NCBI gene;Acc:110000550]	0	0	2319.76	-0.391692	0.0269305	0.370462
ENSLBEG00000028257	LIM and SH3 domain protein 1-like [Source:NCBI gene;Acc:109981857]	0	0	329.511	-0.353046	0.0269385	0.370462
ENSLBEG00000010799	chromosome unknown C1orf216 homolog [Source:NCBI gene;Acc:109999970]	0	0	22.4591	0.805366	0.0269963	0.370462
ENSLBEG00000018245	phosphoprotein membrane anchor with glycosphingolipid microdomains 1 [Source:NCBI gene;Acc:109997756]	pag1	pag1	980.907	-0.319269	0.0270058	0.370462
ENSLBEG00000021408	retinoid-binding protein 7-like [Source:NCBI gene;Acc:109982806]	nmnat1	nmnat1	449.954	-0.276618	0.0270407	0.370462
ENSLBEG00000021725	transmembrane channel-like protein 1 [Source:NCBI gene;Acc:109983307]	TMC1	TMC1	17.602	-1.10827	0.0270696	0.370462
ENSLBEG00000005118	0	0	0	623.767	-0.65869	0.0270733	0.370462
ENSLBEG00000016050	C-Jun-amino-terminal kinase-interacting protein 4-like [Source:NCBI gene;Acc:109993679]	si:dkey-17m8.1	si:dkey-17m8.1	958.767	-0.248576	0.0270771	0.370462
ENSLBEG00000019706	synaptotagmin 14 [Source:NCBI gene;Acc:109992146]	syt14a	syt14a	6.39991	1.32742	0.0271181	NA
ENSLBEG00000011749	rap1 GTPase-activating protein 1-like [Source:NCBI gene;Acc:109986213]	rap1gap	rap1gap	510.81	0.471072	0.0271866	0.370462
ENSLBEG00000011966	tubulin alpha-1A chain-like [Source:NCBI gene;Acc:109994754]	si:ch73-199e17.1	si:ch73-199e17.1	128.731	0.736387	0.0271904	0.370462
ENSLBEG00000022945	0	0	0	10.2119	-1.48812	0.0271974	0.370462
ENSLBEG00000006865	transketolase-like [Source:NCBI gene;Acc:109984886]	tktb	tktb	3053.03	0.493261	0.0272048	0.370462
ENSLBEG00000010167	tectonin beta-propeller repeat containing 1 [Source:NCBI gene;Acc:109994697]	tecpr1a	tecpr1a	169.899	-0.317423	0.027205	0.370462
ENSLBEG00000026827	TNF receptor associated protein 1 [Source:NCBI gene;Acc:109994763]	trap1	trap1	203.366	0.559943	0.0272074	0.370462
ENSLBEG00000007021	hook microtubule tethering protein 1 [Source:NCBI gene;Acc:109982573]	hook1	hook1	999.917	-0.342462	0.0272258	0.370462
ENSLBEG00000010598	zinc finger SWIM-type containing 5 [Source:NCBI gene;Acc:109997599]	zswim5	zswim5	456.965	-0.304054	0.0272734	0.370807
ENSLBEG00000012029	transmembrane protein 116 [Source:NCBI gene;Acc:109998161]	si:dkey-30c15.2	si:dkey-30c15.2	62.1519	-1.17675	0.0273075	0.370967
ENSLBEG00000013433	MARVEL domain-containing protein 2-like [Source:NCBI gene;Acc:109991962]	si:dkey-208k22.6	si:dkey-208k22.6	766.254	-0.266063	0.0273423	0.371137
ENSLBEG00000024942	para-nitrobenzyl esterase-like [Source:NCBI gene;Acc:109996753]	si:ch211-71n6.4	si:ch211-71n6.4	194.939	0.509786	0.0274129	0.371611
ENSLBEG00000014573	0	0	0	18.3531	-0.893243	0.0274218	0.371611
ENSLBEG00000014217	two pore segment channel 2 [Source:NCBI gene;Acc:109999430]	TPCN2	TPCN2	353.038	-0.370555	0.0275694	0.373064
ENSLBEG00000010046	0	0	0	19.4276	1.67278	0.027602	0.373064
ENSLBEG00000025893	cysteine desulfurase, mitochondrial-like [Source:NCBI gene;Acc:109981775]	nfs1	nfs1	475.174	0.451454	0.0276029	0.373064
ENSLBEG00000027011	occludin-like [Source:NCBI gene;Acc:110000919]	si:ch73-61d6.3	si:ch73-61d6.3	2357.42	-0.336845	0.0276186	0.373064
ENSLBEG00000001008	0	0	0	81.5655	-0.564575	0.0276922	0.373691
ENSLBEG00000010802	0	0	0	23.5817	-0.907051	0.0277099	0.373691
ENSLBEG00000018283	translocase of inner mitochondrial membrane 9 [Source:NCBI gene;Acc:109998821]	0	0	266.273	0.340908	0.0277404	0.373799
ENSLBEG00000023948	mitochondrial ribosome recycling factor [Source:NCBI gene;Acc:109981247]	mrrf	mrrf	164.545	0.342737	0.0277644	0.37382
ENSLBEG00000024415	zinc finger FYVE domain-containing protein 1-like [Source:NCBI gene;Acc:109982926]	zfyve1	zfyve1	149.167	-0.340656	0.0278204	0.374272
ENSLBEG00000016763	0	RF01233	RF01233	7.06424	1.15576	0.0278353	NA
ENSLBEG00000019367	Mtr4 exosome RNA helicase [Source:NCBI gene;Acc:109997133]	mtrex	mtrex	386.891	0.269051	0.0278927	0.37433
ENSLBEG00000018269	0	0	0	51.2354	-0.849641	0.02795	0.37433
ENSLBEG00000011270	carcinoembryonic antigen-related cell adhesion molecule 5-like [Source:NCBI gene;Acc:109988997]	si:ch211-264f5.6	si:ch211-264f5.6	409.098	0.772875	0.0279664	0.37433
ENSLBEG00000027201	thiosulfate sulfurtransferase/rhodanese-like domain-containing protein 1 [Source:NCBI gene;Acc:109992642]	si:dkey-34l15.1	si:dkey-34l15.1	828.53	-0.644968	0.0279724	0.37433
ENSLBEG00000012141	ORM1-like protein 3 [Source:NCBI gene;Acc:109992408]	ormdl3	ormdl3	18.2405	0.652967	0.0280068	0.37433
ENSLBEG00000006045	0	0	0	26.6834	0.671459	0.0280193	0.37433
ENSLBEG00000023877	SRY-box 8 [Source:NCBI gene;Acc:109994387]	SOX8	SOX8	62.0565	-0.919936	0.0280619	0.37433
ENSLBEG00000015197	0	0	0	489.636	-0.599731	0.0280692	0.37433
ENSLBEG00000023149	signal peptide peptidase like 3 [Source:NCBI gene;Acc:109981166]	sppl3	sppl3	673.029	-0.221559	0.0280966	0.37433
ENSLBEG00000019373	NACC family member 2 [Source:NCBI gene;Acc:109987350]	NACC2	NACC2	779.231	-0.423121	0.02811	0.37433
ENSLBEG00000007512	0	0	0	43.5442	-1.11714	0.0281227	0.37433
ENSLBEG00000004130	uncharacterized transmembrane protein DDB_G0289901-like [Source:NCBI gene;Acc:109993476]	0	0	3673.24	-0.570432	0.0281338	0.37433
ENSLBEG00000020456	WD repeat domain 61 [Source:NCBI gene;Acc:110005329]	wdr61	wdr61	335.063	0.198079	0.0281534	0.37433
ENSLBEG00000017880	sushi domain-containing protein 2-like [Source:NCBI gene;Acc:110001821]	0	0	56.1625	1.68053	0.0281596	0.37433
ENSLBEG00000010869	ribosomal protein L32 [Source:NCBI gene;Acc:109980981]	rpl32	rpl32	15993.4	0.303964	0.0281701	0.37433
ENSLBEG00000027175	adaptor protein, phosphotyrosine interacting with PH domain and leucine zipper 1 [Source:NCBI gene;Acc:109981760]	hesx1	hesx1	792.118	-0.200669	0.028202	0.37433
ENSLBEG00000028138	ATP synthase F1 subunit alpha [Source:NCBI gene;Acc:109998491]	ATP5F1A	ATP5F1A	2248.51	0.432621	0.0282068	0.37433
ENSLBEG00000013687	LON peptidase N-terminal domain and RING finger protein 1-like [Source:NCBI gene;Acc:109981046]	lonrf1	lonrf1	289.653	0.336009	0.0282755	0.374755
ENSLBEG00000004692	origin recognition complex subunit 4 [Source:NCBI gene;Acc:109984198]	orc4	orc4	63.5165	0.56867	0.0282899	0.374755
ENSLBEG00000007631	PDZ domain-containing RING finger protein 4-like [Source:NCBI gene;Acc:110002721]	PDZRN4	PDZRN4	5.85533	-1.10575	0.0283228	NA
ENSLBEG00000005441	activating transcription factor 3 [Source:NCBI gene;Acc:109999847]	atf3	atf3	571.066	0.418579	0.0283235	0.374755
ENSLBEG00000018423	probable Xaa-Pro aminopeptidase 3 [Source:NCBI gene;Acc:109975239]	0	0	58.5105	0.446994	0.0283288	0.374755
ENSLBEG00000021549	unc-13 homolog B [Source:NCBI gene;Acc:109981673]	0	0	74.2944	0.641077	0.0284093	0.375521
ENSLBEG00000014097	tyrosine kinase with immunoglobulin like and EGF like domains 1 [Source:NCBI gene;Acc:109983832]	tie1	tie1	105.13	0.440783	0.0284629	0.375921
ENSLBEG00000026713	ribonuclease P/MRP subunit p14 [Source:NCBI gene;Acc:109981782]	rpp14	rpp14	116.879	0.505371	0.028537	0.375921
ENSLBEG00000028754	protein CYR61-like [Source:NCBI gene;Acc:109992745]	cyr61l2	cyr61l2	62.5987	0.540546	0.0285468	0.375921
ENSLBEG00000019300	dipeptidyl aminopeptidase-like protein 6 [Source:NCBI gene;Acc:109985844]	dpp6b	dpp6b	41.9514	-1.03918	0.0285669	0.375921
ENSLBEG00000009842	CDK5 regulatory subunit associated protein 1 [Source:NCBI gene;Acc:109983180]	cdk5rap1	cdk5rap1	71.0347	0.472154	0.028567	0.375921
ENSLBEG00000000196	adseverin-like [Source:NCBI gene;Acc:109982742]	0	0	129.892	0.571543	0.0285749	0.375921
ENSLBEG00000003400	ligand dependent nuclear receptor corepressor like [Source:NCBI gene;Acc:110000407]	0	0	317.874	-0.423692	0.0286297	0.376344
ENSLBEG00000023022	inter-alpha-trypsin inhibitor heavy chain family member 5 [Source:NCBI gene;Acc:109997219]	itih5	itih5	128.3	0.704838	0.0286962	0.37692
ENSLBEG00000007328	polycomb group ring finger 1 [Source:NCBI gene;Acc:109999903]	pcgf1	pcgf1	67.9751	-0.460503	0.0287243	0.376992
ENSLBEG00000018407	zinc finger protein 366 [Source:NCBI gene;Acc:109981601]	znf366	znf366	184.466	-0.348447	0.0288328	0.378118
ENSLBEG00000022760	syndecan-2-like [Source:NCBI gene;Acc:110000245]	0	0	1044.97	0.430302	0.0289308	0.379105
ENSLBEG00000009457	Rho GTPase activating protein 21 [Source:NCBI gene;Acc:109983799]	arhgap21a	arhgap21a	346.134	-0.349637	0.0289826	0.379485
ENSLBEG00000007899	ring finger protein 217 [Source:NCBI gene;Acc:109990084]	rnf217	rnf217	381.5	-0.299685	0.0290172	0.37964
ENSLBEG00000011046	membrane palmitoylated protein 5 [Source:NCBI gene;Acc:109979441]	mpp5b	mpp5b	33.0894	0.571066	0.0290691	0.380021
ENSLBEG00000021605	WD repeat domain 4 [Source:NCBI gene;Acc:109985149]	wdr4	wdr4	46.7889	0.56527	0.0291411	0.380186
ENSLBEG00000005545	DNA-binding protein SATB1-like [Source:NCBI gene;Acc:109994623]	SATB1	SATB1	87.6527	-0.616067	0.0291468	0.380186
ENSLBEG00000002778	polycomb protein SCMH1-like [Source:NCBI gene;Acc:109999779]	0	0	131.064	-0.332491	0.0291823	0.380186
ENSLBEG00000027050	solute carrier family 13 member 2-like [Source:NCBI gene;Acc:109988043]	SLC13A2	SLC13A2	667.186	-0.634049	0.029216	0.380186
ENSLBEG00000000534	0	0	0	34.3553	0.982605	0.0292163	0.380186
ENSLBEG00000001526	diphthamide biosynthesis 7 [Source:NCBI gene;Acc:109995189]	dph7	dph7	52.5816	0.60491	0.0292187	0.380186
ENSLBEG00000001360	cell death-inducing DFFA-like effector b [Source:ZFIN;Acc:ZDB-GENE-080514-2]	cideb	cideb	6203.02	-0.373216	0.0293152	0.381047
ENSLBEG00000005454	programmed cell death 1 ligand 1-like [Source:NCBI gene;Acc:110002820]	0	0	853.706	-0.366949	0.0293307	0.381047
ENSLBEG00000013595	0	0	0	19.0555	-1.24019	0.0293811	0.381202
ENSLBEG00000020522	rho GTPase-activating protein 44-like [Source:NCBI gene;Acc:110000197]	si:ch211-114m9.1	si:ch211-114m9.1	14.4198	0.975623	0.0293884	0.381202
ENSLBEG00000003747	adhesion G protein-coupled receptor A2-like [Source:NCBI gene;Acc:110001603]	adgra2	adgra2	67.9716	0.452509	0.0294194	0.381307
ENSLBEG00000013428	actin binding LIM protein family, member 2 [Source:ZFIN;Acc:ZDB-GENE-100316-5]	ablim2	ablim2	99.5149	0.511265	0.0294659	0.381613
ENSLBEG00000011355	0	0	0	560.804	-0.425227	0.0294914	0.381647
ENSLBEG00000009784	regulator of G-protein signaling 5-like [Source:NCBI gene;Acc:109997192]	rgs5b	rgs5b	19.0824	1.03686	0.0295995	0.382749
ENSLBEG00000018723	cystatin B [Source:NCBI gene;Acc:109993109]	0	0	2488.86	0.38546	0.029626	0.382753
ENSLBEG00000022123	heat shock protein family D (Hsp60) member 1 [Source:NCBI gene;Acc:109986916]	hspd1	hspd1	274.85	0.736964	0.0296505	0.382753
ENSLBEG00000019273	SH2 domain-containing adapter protein D-like [Source:NCBI gene;Acc:109994316]	shdb	shdb	273.816	-0.462669	0.0296688	0.382753
ENSLBEG00000009085	calpain-1 catalytic subunit-like [Source:NCBI gene;Acc:109977682]	0	0	13.1126	0.822325	0.0297355	0.383317
ENSLBEG00000024238	kynurenine aminotransferase 1 [Source:NCBI gene;Acc:109984478]	kyat1	kyat1	174.125	-0.601979	0.029894	0.384078
ENSLBEG00000011209	calcium binding protein 39 [Source:NCBI gene;Acc:109991928]	cab39	cab39	672.657	-0.209332	0.0299045	0.384078
ENSLBEG00000010592	3-mercaptopyruvate sulfurtransferase-like [Source:NCBI gene;Acc:109996977]	zgc:162544	zgc:162544	69.9585	1.01896	0.0299207	0.384078
ENSLBEG00000003556	protein spire homolog 1-like [Source:NCBI gene;Acc:109982420]	spire1a	spire1a	409.416	-0.384743	0.0299451	0.384078
ENSLBEG00000020983	angiopoietin like 6 [Source:NCBI gene;Acc:109989250]	0	0	21.2196	0.956316	0.0299735	0.384078
ENSLBEG00000007788	monoglyceride lipase [Source:NCBI gene;Acc:109993563]	mgll	mgll	71.7865	-0.724885	0.0299979	0.384078
ENSLBEG00000003759	tripartite motif-containing protein 16-like [Source:NCBI gene;Acc:109990283]	0	0	181.346	-0.291003	0.0300587	0.384078
ENSLBEG00000021704	0	0	0	4.90248	-1.44006	0.0300597	NA
ENSLBEG00000011684	C-C motif chemokine 4-like [Source:NCBI gene;Acc:109998140]	0	0	1552.97	-0.630818	0.0300824	0.384078
ENSLBEG00000016825	guanine nucleotide-binding protein G(I)/G(S)/G(T) subunit beta-2 [Source:NCBI gene;Acc:109997068]	gnb2	gnb2	521.857	-0.473052	0.0301072	0.384078
ENSLBEG00000002305	protocadherin alpha-C2-like [Source:NCBI gene;Acc:109990510]	pcdh2ac	pcdh2ac	303.232	0.342675	0.0301121	0.384078
ENSLBEG00000024673	RAB27A, member RAS oncogene family [Source:NCBI gene;Acc:110005798]	rab27a	rab27a	626.573	0.369827	0.0301127	0.384078
ENSLBEG00000017369	40S ribosomal protein S17-like [Source:NCBI gene;Acc:109986828]	rps17	rps17	2547.27	0.233034	0.0301395	0.384078
ENSLBEG00000002326	transmembrane protein 245 [Source:NCBI gene;Acc:109997422]	tmem245	tmem245	122.536	0.352095	0.0301476	0.384078
ENSLBEG00000002579	peroxiredoxin 5 [Source:NCBI gene;Acc:109991016]	prdx5	prdx5	779.476	0.503663	0.0301625	0.384078
ENSLBEG00000021180	UTP25, small subunit processor component [Source:NCBI gene;Acc:109990842]	utp25	utp25	74.0039	0.747026	0.0301703	0.384078
ENSLBEG00000006472	DEP domain containing MTOR interacting protein [Source:NCBI gene;Acc:109995309]	deptor	deptor	310.398	-0.548272	0.0301766	0.384078
ENSLBEG00000018681	tandem C2 domains nuclear protein-like [Source:NCBI gene;Acc:110002558]	0	0	91.9278	0.718577	0.0301866	0.384078
ENSLBEG00000010713	ras and EF-hand domain-containing protein homolog [Source:NCBI gene;Acc:109988308]	CRACR2A	CRACR2A	115.172	0.371849	0.0302279	0.384309
ENSLBEG00000022038	sesquipedalian-1-like [Source:NCBI gene;Acc:109988230]	0	0	810.961	-0.231812	0.0303099	0.384572
ENSLBEG00000025404	receptor-type tyrosine-protein phosphatase H-like [Source:NCBI gene;Acc:109987505]	0	0	2157.82	-0.744207	0.0303307	0.384572
ENSLBEG00000022701	UBA like domain containing 2 [Source:NCBI gene;Acc:109993870]	ubald2	ubald2	966.2	-0.31682	0.0303415	0.384572
ENSLBEG00000014810	0	0	0	363.645	-0.543935	0.0303443	0.384572
ENSLBEG00000000743	NOP56 ribonucleoprotein [Source:NCBI gene;Acc:109980842]	nop56	nop56	997.038	0.382108	0.0303838	0.384572
ENSLBEG00000005663	P2X purinoceptor 1-like [Source:NCBI gene;Acc:109996352]	p2rx1	p2rx1	156.648	0.449422	0.0303871	0.384572
ENSLBEG00000019817	protein FAM3D-like [Source:NCBI gene;Acc:109980642]	si:dkeyp-67f1.2	si:dkeyp-67f1.2	8.24692	-1.01598	0.0304128	NA
ENSLBEG00000011633	lathosterol oxidase-like [Source:NCBI gene;Acc:109987880]	0	0	33.0836	1.3358	0.0304298	0.384821
ENSLBEG00000022394	synaptosome associated protein 25 [Source:NCBI gene;Acc:109982374]	snap25a	snap25a	31.925	0.652323	0.0304924	0.384892
ENSLBEG00000008305	partner of NOB1 homolog [Source:NCBI gene;Acc:109987819]	pno1	pno1	194.21	0.446788	0.0304926	0.384892
ENSLBEG00000028619	ubiquitin-conjugating enzyme E2 N-like [Source:NCBI gene;Acc:109987635]	0	0	276.411	-0.314021	0.0305094	0.384892
ENSLBEG00000014694	0	0	0	15.6529	-0.794977	0.0305279	0.384892
ENSLBEG00000026326	zinc finger homeobox 3 [Source:NCBI gene;Acc:110005989]	zfhx3	zfhx3	61.2806	-0.56879	0.0305855	0.38499
ENSLBEG00000026618	60S ribosomal protein L22-like [Source:NCBI gene;Acc:109983408]	rpl22	rpl22	5141.5	0.404498	0.0306024	0.38499
ENSLBEG00000002535	transcription factor 21 [Source:NCBI gene;Acc:109987714]	tcf21	tcf21	167.977	0.543146	0.0306051	0.38499
ENSLBEG00000002494	potassium voltage-gated channel subfamily V member 2-like [Source:NCBI gene;Acc:110000733]	0	0	11.0675	0.973039	0.0307439	0.386263
ENSLBEG00000022897	protein turtle homolog A-like [Source:NCBI gene;Acc:109981674]	igsf9a	igsf9a	922.756	-0.349386	0.0307527	0.386263
ENSLBEG00000024951	solute carrier family 38 member 4 [Source:NCBI gene;Acc:109997289]	slc38a4	slc38a4	110.715	0.47049	0.0308303	0.386601
ENSLBEG00000014838	0	0	0	172.743	-0.552181	0.0308334	0.386601
ENSLBEG00000009049	putative hexokinase HKDC1 [Source:NCBI gene;Acc:109988665]	hkdc1	hkdc1	4633.53	-0.31752	0.0308639	0.386601
ENSLBEG00000022898	0	0	0	338.2	-0.459985	0.0308898	0.386601
ENSLBEG00000003558	sphingosine-1-phosphate phosphatase 1 [Source:NCBI gene;Acc:109978540]	sgpp1	sgpp1	333.909	-0.834125	0.0309036	0.386601
ENSLBEG00000013731	0	0	0	101.854	2.03659	0.0309188	0.386601
ENSLBEG00000024612	B-cell lymphoma/leukemia 11A-like [Source:NCBI gene;Acc:109993916]	bcl11aa	bcl11aa	111.806	-0.609655	0.0309969	0.387287
ENSLBEG00000003524	paired box 5 [Source:NCBI gene;Acc:109989954]	pax5	pax5	47.7423	-0.778587	0.0310449	0.387462
ENSLBEG00000027524	elaC ribonuclease Z 2 [Source:NCBI gene;Acc:109989302]	elac2	elac2	67.1946	0.617984	0.0310652	0.387462
ENSLBEG00000008784	spectrin repeat containing nuclear envelope family member 3 [Source:NCBI gene;Acc:109989481]	syne3	syne3	329.826	-0.310103	0.0311127	0.387462
ENSLBEG00000001982	chromosome unknown C1orf35 homolog [Source:NCBI gene;Acc:109995728]	zgc:63882	zgc:63882	260.231	-0.28395	0.0311148	0.387462
ENSLBEG00000020564	ADAM metallopeptidase with thrombospondin type 1 motif 17 [Source:NCBI gene;Acc:109982302]	adamts17	adamts17	17.9628	-0.914981	0.0311559	0.387462
ENSLBEG00000022002	neurensin 1 [Source:NCBI gene;Acc:109984405]	nrsn1	nrsn1	57.0253	0.503156	0.0311602	0.387462
ENSLBEG00000008948	protein tweety homolog 3-like [Source:NCBI gene;Acc:109991087]	ttyh3b	ttyh3b	175.017	-0.3505	0.0311941	0.387462
ENSLBEG00000006247	0	0	0	12.2078	-1.09743	0.0311971	0.387462
ENSLBEG00000024077	TBC1 domain family member 23 [Source:NCBI gene;Acc:109982650]	tbc1d23	tbc1d23	969.281	-0.189288	0.0312445	0.38749
ENSLBEG00000028177	transmembrane protein 241 [Source:NCBI gene;Acc:110001481]	tmem241	tmem241	77.9389	0.462056	0.031254	0.38749
ENSLBEG00000014595	unconventional myosin-IXb-like [Source:NCBI gene;Acc:109999447]	si:zfos-588f8.1	si:zfos-588f8.1	1080.1	-0.250993	0.0313089	0.38749
ENSLBEG00000001499	apolipoprotein Eb-like [Source:NCBI gene;Acc:109996289]	apoeb	apoeb	2077.58	0.593819	0.0313327	0.38749
ENSLBEG00000011194	0	0	0	24.0276	1.32632	0.0313518	0.38749
ENSLBEG00000018658	aminolevulinate dehydratase [Source:NCBI gene;Acc:109985664]	alad	alad	146.044	0.50015	0.0313537	0.38749
ENSLBEG00000010200	zgc:158343 [Source:ZFIN;Acc:ZDB-GENE-061201-9]	zgc:158343	zgc:158343	20.1551	0.921047	0.0313621	0.38749
ENSLBEG00000014837	pyroglutamyl-peptidase 1-like [Source:NCBI gene;Acc:109991960]	pgpep1	pgpep1	18.6619	1.11429	0.0313939	0.387517
ENSLBEG00000010849	mitogen-activated protein kinase 14A [Source:NCBI gene;Acc:109984231]	MAPK14	MAPK14	434.445	-0.228894	0.0314199	0.387517
ENSLBEG00000022648	insulin like growth factor binding protein 7 [Source:NCBI gene;Acc:110004805]	IGFBP7	IGFBP7	246.77	-0.495537	0.0314341	0.387517
ENSLBEG00000004471	cyclic nucleotide gated channel alpha 2 [Source:NCBI gene;Acc:109981482]	cnga2b	cnga2b	10.1528	0.959274	0.0314729	0.387709
ENSLBEG00000016518	eukaryotic translation initiation factor 2 subunit gamma [Source:NCBI gene;Acc:109993144]	eif2s3	eif2s3	3162.6	0.382935	0.0315689	0.388295
ENSLBEG00000024938	protein kinase AMP-activated catalytic subunit alpha 1 [Source:NCBI gene;Acc:109984460]	prkaa1	prkaa1	1832.42	-0.253519	0.0315707	0.388295
ENSLBEG00000024452	0	0	0	35.8632	-0.813978	0.0315905	0.388295
ENSLBEG00000006041	lipoprotein lipase [Source:NCBI gene;Acc:109987765]	lpl	lpl	398.661	0.659725	0.0316788	0.389093
ENSLBEG00000028073	major facilitator superfamily domain containing 8 [Source:NCBI gene;Acc:109993382]	mfsd8	mfsd8	629.845	-0.34248	0.0317267	0.389132
ENSLBEG00000017558	eukaryotic translation initiation factor 2B subunit gamma [Source:NCBI gene;Acc:109991462]	eif2b3	eif2b3	261.429	0.339498	0.0317287	0.389132
ENSLBEG00000011925	sortilin-like [Source:NCBI gene;Acc:109984251]	0	0	53.499	0.788046	0.0318238	0.390011
ENSLBEG00000023709	FES proto-oncogene, tyrosine kinase [Source:NCBI gene;Acc:110005749]	fes	fes	277.197	-0.399402	0.031915	0.390834
ENSLBEG00000023982	probable assembly chaperone of rpl4 [Source:NCBI gene;Acc:109994967]	si:dkey-12j5.1	si:dkey-12j5.1	82.3884	0.54738	0.0319379	0.390834
ENSLBEG00000019363	Myb/SANT DNA binding domain containing 4 with coiled-coils [Source:NCBI gene;Acc:109988482]	msantd4	msantd4	33.7831	1.16278	0.0319936	0.390901
ENSLBEG00000006253	discoidin, CUB and LCCL domain containing 2 [Source:NCBI gene;Acc:109996892]	dcbld2	dcbld2	83.4631	0.372643	0.0320087	0.390901
ENSLBEG00000024699	ubiquitin-like protein FUBI [Source:NCBI gene;Acc:109982950]	faua	faua	5753.27	0.412588	0.03205	0.390901
ENSLBEG00000024746	cell cycle progression 1 [Source:NCBI gene;Acc:110006095]	0	0	968.952	-0.239457	0.032056	0.390901
ENSLBEG00000022755	tubulin-specific chaperone cofactor E-like protein [Source:NCBI gene;Acc:109999644]	0	0	1837.29	-0.440926	0.0320607	0.390901
ENSLBEG00000018489	NADH:ubiquinone oxidoreductase complex assembly factor 6 [Source:NCBI gene;Acc:109999552]	ndufaf6	ndufaf6	246.488	0.306128	0.0321004	0.390964
ENSLBEG00000019826	WD repeat domain 34 [Source:NCBI gene;Acc:109988517]	wdr34	wdr34	7.66749	0.830966	0.0321483	NA
ENSLBEG00000010106	0	RF00002	RF00002	23.2087	1.43161	0.0321905	0.390964
ENSLBEG00000021199	radical S-adenosyl methionine domain-containing protein 1, mitochondrial-like [Source:NCBI gene;Acc:110000204]	rsad1	rsad1	35.9386	0.467799	0.0322044	0.390964
ENSLBEG00000017884	secretogranin II [Source:NCBI gene;Acc:109986248]	0	0	60.3776	0.635286	0.0322116	0.390964
ENSLBEG00000013718	erlin-1-like [Source:NCBI gene;Acc:109990750]	erlin1	erlin1	2544.11	-0.307395	0.0322514	0.390964
ENSLBEG00000022323	BCL2 associated athanogene 4 [Source:NCBI gene;Acc:109983375]	bag4	bag4	137.894	0.424453	0.0322539	0.390964
ENSLBEG00000015769	tripartite motif-containing protein 16-like [Source:NCBI gene;Acc:109999474]	0	0	104.26	0.580669	0.0322662	0.390964
ENSLBEG00000019121	disco-interacting protein 2 homolog B-A-like [Source:NCBI gene;Acc:109992490]	dip2bb	dip2bb	261.332	-0.397742	0.03227	0.390964
ENSLBEG00000007036	0	0	0	9.7374	1.50704	0.0322877	0.390964
ENSLBEG00000008352	fatty acid 2-hydroxylase-like [Source:NCBI gene;Acc:109991864]	fa2h	fa2h	856.499	-0.311042	0.0323006	0.390964
ENSLBEG00000007163	refilin-A-like [Source:NCBI gene;Acc:109982018]	rflna	rflna	194.191	-0.294165	0.0323817	0.391335
ENSLBEG00000017133	NOP2/Sun RNA methyltransferase family member 6 [Source:NCBI gene;Acc:109994287]	nsun6	nsun6	21.1301	0.679794	0.0323972	0.391335
ENSLBEG00000008284	protein phosphatase 4 regulatory subunit 2 [Source:NCBI gene;Acc:109985751]	0	0	501.271	-0.236585	0.0324017	0.391335
ENSLBEG00000015236	WD repeat domain 90 [Source:NCBI gene;Acc:109986736]	wdr90	wdr90	53.5216	0.500856	0.0324466	0.391497
ENSLBEG00000002016	leucine rich repeat kinase 2 [Source:NCBI gene;Acc:109986522]	lrrk2	lrrk2	262.481	-0.269222	0.0324759	0.391497
ENSLBEG00000006573	solute carrier family 25 member 48 [Source:NCBI gene;Acc:109995851]	slc25a48	slc25a48	166.584	-0.818689	0.0324856	0.391497
ENSLBEG00000006534	transmembrane protein 42-like [Source:NCBI gene;Acc:110004393]	0	0	23.8538	-0.778029	0.0325462	0.391726
ENSLBEG00000023144	deltex E3 ubiquitin ligase 1 [Source:NCBI gene;Acc:109983367]	DTX1	DTX1	197.6	-0.544846	0.0325683	0.391726
ENSLBEG00000012047	0	0	0	2340.66	-0.547896	0.0325986	0.391726
ENSLBEG00000012503	chloride intracellular channel protein 1-like [Source:NCBI gene;Acc:109978260]	CLIC1	CLIC1	1004.64	-0.350938	0.0325987	0.391726
ENSLBEG00000026838	lysosomal acid lipase/cholesteryl ester hydrolase-like [Source:NCBI gene;Acc:110002005]	lipf	lipf	694.592	-0.65955	0.0326389	0.391926
ENSLBEG00000012213	pumilio RNA binding family member 3 [Source:NCBI gene;Acc:109996477]	pum3	pum3	244.819	0.425713	0.0326896	0.392194
ENSLBEG00000018068	0	0	0	13.4701	1.43528	0.0327263	0.392194
ENSLBEG00000014242	0	0	0	41.7135	-0.975657	0.0327534	0.392194
ENSLBEG00000000932	phosphatidylserine synthase 1 [Source:NCBI gene;Acc:109986489]	ptdss1a	ptdss1a	479.644	-0.243349	0.0327796	0.392194
ENSLBEG00000024875	methylcytosine dioxygenase TET3-like [Source:NCBI gene;Acc:109999694]	tet3	tet3	71.2659	-0.674955	0.0328	0.392194
ENSLBEG00000004877	0	RF00271	RF00271	12.1047	1.47218	0.032824	0.392194
ENSLBEG00000023245	5'-3' exoribonuclease 2-like [Source:NCBI gene;Acc:110000255]	0	0	164.072	0.453885	0.032831	0.392194
ENSLBEG00000024780	mitogen-activated protein kinase 1-like [Source:NCBI gene;Acc:109998393]	mapk3	mapk3	1163.95	-0.329279	0.032868	0.392194
ENSLBEG00000007874	0	0	0	16.8497	-1.80089	0.0329199	0.392194
ENSLBEG00000028668	rho GTPase-activating protein 29-like [Source:NCBI gene;Acc:109992676]	arhgap29a	arhgap29a	97.7114	0.549576	0.0329223	0.392194
ENSLBEG00000017656	ubiquitin carboxyl-terminal hydrolase CYLD-like [Source:NCBI gene;Acc:109983871]	cyldb	cyldb	9.80508	1.35537	0.0329314	0.392194
ENSLBEG00000004809	0	0	0	50.0933	-1.02145	0.0329461	0.392194
ENSLBEG00000005189	0	0	0	9.33952	-1.43056	0.0329736	NA
ENSLBEG00000007447	hepcidin antimicrobial peptide [Source:NCBI gene;Acc:109983712]	0	0	25.2143	1.60769	0.0329844	0.392194
ENSLBEG00000010369	si:ch211-112f3.4 [Source:ZFIN;Acc:ZDB-GENE-141219-9]	si:ch211-112f3.4	si:ch211-112f3.4	13.3898	1.34583	0.0330192	0.392194
ENSLBEG00000016910	0	0	0	1027.68	-0.564629	0.033024	0.392194
ENSLBEG00000004497	0	0	0	22.7156	1.18219	0.033038	0.392194
ENSLBEG00000000758	exostosin glycosyltransferase 2 [Source:NCBI gene;Acc:109983027]	ext2	ext2	332.371	-0.264021	0.033146	0.393196
ENSLBEG00000005138	0	0	0	47.4551	-2.02688	0.0333179	0.394953
ENSLBEG00000024056	molybdenum cofactor biosynthesis protein 1-like [Source:NCBI gene;Acc:109989739]	0	0	71.7741	-0.645074	0.033349	0.395041
ENSLBEG00000008862	IQ motif containing E [Source:NCBI gene;Acc:109990814]	0	0	67.8467	-0.602084	0.0334249	0.395659
ENSLBEG00000016127	mitochondrial import receptor subunit TOM40B-like [Source:NCBI gene;Acc:109998221]	TOMM40L	TOMM40L	28.0073	-0.535598	0.0334737	0.395955
ENSLBEG00000017144	0	0	0	668.352	0.310679	0.0335668	0.396601
ENSLBEG00000021251	interferon-induced transmembrane protein 1-like [Source:NCBI gene;Acc:110005412]	0	0	55.3684	-1.41496	0.0335836	0.396601
ENSLBEG00000017146	LDL receptor related protein 11 [Source:NCBI gene;Acc:109988451]	lrp11	lrp11	19.3727	0.532464	0.0335998	0.396601
ENSLBEG00000015763	poly(A) specific ribonuclease subunit PAN2 [Source:NCBI gene;Acc:109987059]	pan2	pan2	164.505	0.377265	0.0336323	0.396704
ENSLBEG00000013062	myopalladin [Source:NCBI gene;Acc:109999419]	MYPN	MYPN	147.661	-0.400218	0.0336898	0.397101
ENSLBEG00000008787	F-box-like/WD repeat-containing protein TBL1XR1 [Source:NCBI gene;Acc:109996567]	tbl1xr1b	tbl1xr1b	624.953	0.252646	0.03377	0.397376
ENSLBEG00000026656	synuclein-like [Source:NCBI gene;Acc:109993317]	sncgb	sncgb	13.0543	0.787139	0.0337838	0.397376
ENSLBEG00000023225	leucine rich pentatricopeptide repeat containing [Source:NCBI gene;Acc:109996210]	lrpprc	lrpprc	381.879	0.382028	0.0338148	0.397376
ENSLBEG00000022946	secretagogin-like [Source:NCBI gene;Acc:109984434]	scgn	scgn	191.858	0.387826	0.033816	0.397376
ENSLBEG00000028702	chloride intracellular channel 2 [Source:NCBI gene;Acc:109992708]	clic2	clic2	292.766	0.621264	0.0338325	0.397376
ENSLBEG00000018167	drebrin 1 [Source:NCBI gene;Acc:110000688]	dbn1	dbn1	146.979	0.474651	0.0339141	0.398008
ENSLBEG00000002703	B9 domain containing 1 [Source:NCBI gene;Acc:109995749]	b9d1	b9d1	20.1995	-0.591177	0.0339531	0.398008
ENSLBEG00000015609	0	0	0	497.841	0.271442	0.0339579	0.398008
ENSLBEG00000020504	non-receptor tyrosine-protein kinase TYK2-like [Source:NCBI gene;Acc:109989234]	0	0	494.335	-0.234313	0.034015	0.398177
ENSLBEG00000010561	gastrotropin-like [Source:NCBI gene;Acc:109997585]	fabp6	fabp6	483.925	3.83552	0.0340202	0.398177
ENSLBEG00000014450	cohesin subunit SA-2-like [Source:NCBI gene;Acc:109981054]	stag2b	stag2b	1357.18	-0.24391	0.0340681	0.398453
ENSLBEG00000013187	CDK2 associated cullin domain 1 [Source:NCBI gene;Acc:109999420]	cacul1	cacul1	89.8211	0.493315	0.0341257	0.398453
ENSLBEG00000001646	calpain 9 [Source:NCBI gene;Acc:109988205]	capn9	capn9	19.342	1.89137	0.0341551	0.398453
ENSLBEG00000020359	mitogen-activated protein kinase kinase kinase 3-like [Source:NCBI gene;Acc:109992800]	map3k20	map3k20	768.343	0.204099	0.0341598	0.398453
ENSLBEG00000020840	ABR, RhoGEF and GTPase activating protein [Source:NCBI gene;Acc:109998865]	ABR	ABR	2395.54	-0.28152	0.0341634	0.398453
ENSLBEG00000026758	cathepsin L1-like [Source:NCBI gene;Acc:109984519]	ctss1	ctss1	288.526	-0.338712	0.0342002	0.398604
ENSLBEG00000013442	CREB3 regulatory factor-like [Source:NCBI gene;Acc:109998172]	0	0	525.539	-0.655102	0.0343129	0.399119
ENSLBEG00000020353	dnaJ homolog subfamily C member 15-like [Source:NCBI gene;Acc:109983981]	dnajc15	dnajc15	51.698	0.641989	0.0343153	0.399119
ENSLBEG00000002187	RAS guanyl releasing protein 2 [Source:NCBI gene;Acc:109992852]	RASGRP2	RASGRP2	97.545	0.363106	0.0343673	0.399119
ENSLBEG00000008665	protocadherin alpha-C2-like [Source:NCBI gene;Acc:109981443]	0	0	173.039	-0.491744	0.0343802	0.399119
ENSLBEG00000001518	NudC domain containing 3 [Source:NCBI gene;Acc:110000917]	nudcd3	nudcd3	199.877	0.335644	0.0343852	0.399119
ENSLBEG00000017722	neutral cholesterol ester hydrolase 1-like [Source:NCBI gene;Acc:109994289]	0	0	26.0491	-0.622887	0.0343882	0.399119
ENSLBEG00000021467	0	0	0	42.4382	0.674923	0.0344723	0.399816
ENSLBEG00000007496	sideroflexin-1-like [Source:NCBI gene;Acc:109994660]	sfxn3	sfxn3	307.005	0.432286	0.0345241	0.400138
ENSLBEG00000010348	adenylate kinase 6 [Source:NCBI gene;Acc:109982046]	zgc:86811	zgc:86811	333.104	0.303258	0.0345678	0.400367
ENSLBEG00000020534	eukaryotic translation initiation factor 4B [Source:NCBI gene;Acc:109993806]	eif4bb	eif4bb	2079.78	0.334377	0.0347179	0.401826
ENSLBEG00000022282	0	0	0	8.43573	1.01352	0.0347855	NA
ENSLBEG00000019902	si:dkeyp-117h8.2 [Source:ZFIN;Acc:ZDB-GENE-041210-321]	si:dkeyp-117h8.2	si:dkeyp-117h8.2	662.772	-0.667707	0.034853	0.403109
ENSLBEG00000003879	diamine acetyltransferase 1-like [Source:NCBI gene;Acc:109983566]	sat1a.1	sat1a.1	8429.32	-0.557716	0.0348901	0.403258
ENSLBEG00000028236	ATR serine/threonine kinase [Source:NCBI gene;Acc:109987572]	atr	atr	184.87	-0.505181	0.0349407	0.403563
ENSLBEG00000020523	Cbl proto-oncogene [Source:NCBI gene;Acc:109999255]	cbl	cbl	1093.19	-0.223111	0.0349713	0.403621
ENSLBEG00000000776	uracil-DNA glycosylase-like [Source:NCBI gene;Acc:109990949]	UNG	UNG	34.0999	0.59375	0.0349942	0.403621
ENSLBEG00000008348	0	0	0	35.7772	-1.58037	0.0350437	0.403912
ENSLBEG00000015318	clusterin-like protein 1 [Source:NCBI gene;Acc:109985036]	clul1	clul1	20.8467	0.987856	0.0351178	0.40427
ENSLBEG00000027689	cytochrome P450 4B1-like [Source:NCBI gene;Acc:109999116]	cyp4t8	cyp4t8	722.136	-0.268612	0.0351233	0.40427
ENSLBEG00000028426	ras-related protein ORAB-1 [Source:NCBI gene;Acc:110002105]	RAB1A	RAB1A	1446.26	-0.378025	0.0351747	0.404581
ENSLBEG00000016025	mitochondrial carrier 1 [Source:NCBI gene;Acc:109981562]	MTCH1	MTCH1	63.3263	0.54027	0.0352542	0.405216
ENSLBEG00000023583	transmembrane emp24 domain-containing protein 1-like [Source:NCBI gene;Acc:109989223]	tmed1a	tmed1a	1800.41	-0.226799	0.0352857	0.405218
ENSLBEG00000008442	JNK1/MAPK8 associated membrane protein [Source:NCBI gene;Acc:109989509]	jkamp	jkamp	107.398	0.429387	0.035303	0.405218
ENSLBEG00000024886	0	0	0	13.7145	-1.09957	0.035345	0.405298
ENSLBEG00000014661	glycerophosphodiester phosphodiesterase 1-like [Source:NCBI gene;Acc:109989570]	gde1	gde1	60.0164	0.399299	0.0353587	0.405298
ENSLBEG00000007249	complement C4-like [Source:NCBI gene;Acc:109986674]	c4b	c4b	1966.16	0.467464	0.0353858	0.405331
ENSLBEG00000007680	M-phase phosphoprotein 6 [Source:NCBI gene;Acc:109998722]	mphosph6	mphosph6	181.029	0.388715	0.0354518	0.405573
ENSLBEG00000011583	cytochrome c oxidase subunit 5B, mitochondrial-like [Source:NCBI gene;Acc:110006238]	0	0	275.872	0.399861	0.0354896	0.405573
ENSLBEG00000025122	bone morphogenetic protein 6 [Source:NCBI gene;Acc:109989779]	bmp6	bmp6	39.1604	0.567768	0.0355007	0.405573
ENSLBEG00000011937	POU class 2 homeobox 2 [Source:NCBI gene;Acc:109989023]	pou2f2a	pou2f2a	99.8568	-0.549185	0.0355078	0.405573
ENSLBEG00000005166	SECIS binding protein 2 like [Source:NCBI gene;Acc:109989431]	SECISBP2L	SECISBP2L	1521.01	-0.296432	0.0355337	0.405573
ENSLBEG00000010544	solute carrier family 35 member B2 [Source:NCBI gene;Acc:109978660]	slc35b2	slc35b2	55.8002	0.408636	0.0355531	0.405573
ENSLBEG00000013654	poly(A) binding protein cytoplasmic 4 [Source:NCBI gene;Acc:109992444]	pabpc4	pabpc4	233.045	1.09169	0.0356425	0.406315
ENSLBEG00000014956	clarin 1 [Source:NCBI gene;Acc:110004649]	clrn1	clrn1	47.4688	0.897388	0.0356728	0.406382
ENSLBEG00000027733	protein phosphatase Slingshot homolog 2-like [Source:NCBI gene;Acc:109985273]	ssh2b	ssh2b	571.512	-0.233864	0.0357226	0.406672
ENSLBEG00000017798	ras-related protein rab7-like [Source:NCBI gene;Acc:109993753]	0	0	973.04	-0.377799	0.0357837	0.406735
ENSLBEG00000006956	UTP4, small subunit processome component [Source:NCBI gene;Acc:109990278]	utp4	utp4	115.358	0.437089	0.0357966	0.406735
ENSLBEG00000015759	interferon regulatory factor 2 [Source:NCBI gene;Acc:109984280]	irf2	irf2	519.082	-0.262552	0.0358135	0.406735
ENSLBEG00000002984	ribosomal protein L11 [Source:NCBI gene;Acc:109994057]	rpl11	rpl11	2771.74	0.487996	0.0358644	0.406735
ENSLBEG00000018381	sulfatase modifying factor 1 [Source:NCBI gene;Acc:109992485]	sumf1	sumf1	113.57	0.439329	0.0358875	0.406735
ENSLBEG00000012778	ras association domain-containing protein 5-like [Source:NCBI gene;Acc:109984238]	si:dkey-85p17.3	si:dkey-85p17.3	519.7	-0.339809	0.0359043	0.406735
ENSLBEG00000023484	HEAT repeat containing 3 [Source:NCBI gene;Acc:109975796]	heatr3	heatr3	151.394	0.520276	0.035919	0.406735
ENSLBEG00000025751	B cell CLL/lymphoma 6 [Source:NCBI gene;Acc:109983071]	bcl6aa	bcl6aa	210.668	-0.559247	0.0359236	0.406735
ENSLBEG00000021101	basic transcription factor 3 [Source:NCBI gene;Acc:109996667]	btf3	btf3	2453.81	0.55783	0.0359534	0.406796
ENSLBEG00000019227	A-kinase anchoring protein 12 [Source:NCBI gene;Acc:109983236]	akap12b	akap12b	362.138	0.598372	0.0360221	0.407297
ENSLBEG00000022642	rhotekin [Source:NCBI gene;Acc:109996682]	si:dkey-40c11.1	si:dkey-40c11.1	11.0822	-0.795246	0.0360471	0.407303
ENSLBEG00000006428	cyclin K [Source:NCBI gene;Acc:109983679]	ccnk	ccnk	103.886	0.323505	0.0360882	0.407491
ENSLBEG00000002180	RAB11 family interacting protein 4 [Source:NCBI gene;Acc:109993442]	rab11fip4b	rab11fip4b	274.998	-0.330834	0.0361307	0.407695
ENSLBEG00000014192	AP-1 complex subunit mu-1-like [Source:NCBI gene;Acc:109983849]	ap1m3	ap1m3	255.119	-0.440325	0.0362036	0.408033
ENSLBEG00000004547	eukaryotic translation elongation factor 1 delta [Source:NCBI gene;Acc:109986551]	0	0	1185.08	0.385957	0.0362339	0.408033
ENSLBEG00000001385	protein B4 [Source:NCBI gene;Acc:109997407]	h1m	h1m	22.4353	-1.01045	0.0362342	0.408033
ENSLBEG00000013312	mitoferrin-2-like [Source:NCBI gene;Acc:109998175]	0	0	125.895	0.483912	0.0363073	0.40858
ENSLBEG00000002430	protein tyrosine phosphatase type IVA 2-like [Source:NCBI gene;Acc:109989924]	ptp4a2b	ptp4a2b	2613.96	-0.404725	0.0363419	0.408602
ENSLBEG00000007004	integrin-linked kinase-associated serine/threonine phosphatase [Source:ZFIN;Acc:ZDB-GENE-070410-122]	ilkap	ilkap	8.69064	-0.991112	0.0364167	NA
ENSLBEG00000027982	aldehyde dehydrogenase 1 family member L2 [Source:NCBI gene;Acc:109984598]	aldh1l2	aldh1l2	180.399	0.729838	0.0364192	0.408602
ENSLBEG00000018170	macrophage colony-stimulating factor 1 receptor 2-like [Source:NCBI gene;Acc:110000123]	0	0	421.165	0.572173	0.0364373	0.408602
ENSLBEG00000027610	forkhead box protein K2-like [Source:NCBI gene;Acc:109989327]	si:ch211-262e15.1	si:ch211-262e15.1	74.182	0.744447	0.0364431	0.408602
ENSLBEG00000000797	acyl-CoA desaturase-like [Source:NCBI gene;Acc:109981894]	scdb	scdb	8786.44	-0.643602	0.0364881	0.408602
ENSLBEG00000007369	RNA polymerase II subunit C [Source:NCBI gene;Acc:109998045]	polr2c	polr2c	276.589	0.24425	0.0365178	0.408602
ENSLBEG00000002296	fucolectin-1-like [Source:NCBI gene;Acc:110005535]	0	0	35.7863	-1.09168	0.0365275	0.408602
ENSLBEG00000028415	aldo-keto reductase family 1 member D1 [Source:HGNC Symbol;Acc:HGNC:388]	AKR1D1	AKR1D1	1001.8	-0.433753	0.0365279	0.408602
ENSLBEG00000020841	Rho associated coiled-coil containing protein kinase 2 [Source:NCBI gene;Acc:109990844]	rock2a	rock2a	459.332	-0.291977	0.0365301	0.408602
ENSLBEG00000012715	0	RF00277	RF00277	6.20704	1.38788	0.0365981	NA
ENSLBEG00000007610	zinc finger CCHC-type containing 9 [Source:NCBI gene;Acc:110003676]	zcchc9	zcchc9	698.816	0.373694	0.0366138	0.409182
ENSLBEG00000004255	growth arrest and DNA damage inducible gamma [Source:NCBI gene;Acc:109993480]	gadd45ga	gadd45ga	281.217	0.575724	0.036631	0.409182
ENSLBEG00000026095	transient receptor potential cation channel subfamily M member 5-like [Source:NCBI gene;Acc:109990933]	trpm5	trpm5	21.2224	-1.39556	0.0367217	0.409919
ENSLBEG00000013033	WD repeat domain 83 [Source:NCBI gene;Acc:109991428]	wdr83	wdr83	102.838	0.466673	0.0367662	0.410141
ENSLBEG00000027748	endonuclease/exonuclease/phosphatase family domain containing 1 [Source:NCBI gene;Acc:109987555]	eepd1	eepd1	614.165	-0.440002	0.0368717	0.410794
ENSLBEG00000017576	nuclear receptor ROR-beta-like [Source:NCBI gene;Acc:109996088]	rorca	rorca	1387.91	0.510555	0.0368935	0.410794
ENSLBEG00000001146	RAB30, member RAS oncogene family [Source:NCBI gene;Acc:109984780]	rab30	rab30	98.9949	-0.393775	0.0368987	0.410794
ENSLBEG00000008393	AP-2 complex subunit beta [Source:NCBI gene;Acc:109988911]	ap2b1	ap2b1	1411.26	-0.263292	0.0369364	0.410939
ENSLBEG00000001051	apoptosis antagonizing transcription factor [Source:ZFIN;Acc:ZDB-GENE-030131-9654]	aatf	aatf	70.2734	0.4688	0.0370331	0.411625
ENSLBEG00000007716	Krueppel-like factor 2 [Source:NCBI gene;Acc:110001611]	0	0	267.011	0.515758	0.0370699	0.411625
ENSLBEG00000013951	macoilin 1a [Source:ZFIN;Acc:ZDB-GENE-040426-1097]	maco1a	maco1a	593.68	-0.287618	0.0370722	0.411625
ENSLBEG00000026475	DnaJ heat shock protein family (Hsp40) member A3 [Source:NCBI gene;Acc:109995042]	dnaja3a	dnaja3a	395.223	0.546709	0.037118	0.411859
ENSLBEG00000011487	0	0	0	3.8652	-1.85827	0.037134	NA
ENSLBEG00000026700	ribosomal protein S2 [Source:NCBI gene;Acc:109985857]	rps2	rps2	4319.29	0.583472	0.0372475	0.413021
ENSLBEG00000017153	serine and arginine rich splicing factor 5 [Source:NCBI gene;Acc:110005132]	srsf5a	srsf5a	2288.12	0.372375	0.0372933	0.413253
ENSLBEG00000008625	RUN and FYVE domain containing 2 [Source:NCBI gene;Acc:109982105]	rufy2	rufy2	351.895	-0.243698	0.0373227	0.413304
ENSLBEG00000023056	PRKR interacting protein 1 [Source:NCBI gene;Acc:109982346]	prkrip1	prkrip1	50.6621	0.421844	0.0373684	0.413532
ENSLBEG00000001688	glycoprotein A33 [Source:NCBI gene;Acc:109995114]	0	0	2957.7	-0.286179	0.037393	0.413532
ENSLBEG00000015424	protein tyrosine phosphatase, receptor type D [Source:NCBI gene;Acc:109994240]	PTPRD	PTPRD	498.369	-0.297501	0.0374252	0.413615
ENSLBEG00000019666	high affinity choline transporter 1-like [Source:NCBI gene;Acc:110001868]	0	0	254.289	0.917924	0.0374558	0.413678
ENSLBEG00000001128	eukaryotic peptide chain release factor GTP-binding subunit ERF3A-like [Source:NCBI gene;Acc:109992279]	GSPT1	GSPT1	974.541	0.259963	0.0375539	0.414142
ENSLBEG00000000666	KIAA0355 ortholog [Source:NCBI gene;Acc:109981526]	si:ch211-79l17.1	si:ch211-79l17.1	118.537	0.369655	0.0375906	0.414142
ENSLBEG00000003882	oxysterol-binding protein 2-like [Source:NCBI gene;Acc:110000420]	si:ch211-106a19.1	si:ch211-106a19.1	67.8062	-0.782726	0.0375972	0.414142
ENSLBEG00000000892	fibroleukin-like [Source:NCBI gene;Acc:109991694]	fgl2a	fgl2a	521.66	0.477438	0.0375973	0.414142
ENSLBEG00000025734	poly(U)-specific endoribonuclease-C-like [Source:NCBI gene;Acc:110001980]	endouc	endouc	111.891	-0.425387	0.0376349	0.414282
ENSLBEG00000012130	Norrie disease (pseudoglioma) [Source:ZFIN;Acc:ZDB-GENE-060216-2]	ndp	ndp	5.12856	-1.42382	0.0376688	NA
ENSLBEG00000023228	hyaluronidase-2-like [Source:NCBI gene;Acc:109980591]	HYAL2	HYAL2	407.896	-0.359769	0.037723	0.414325
ENSLBEG00000002377	0	0	0	10.2239	1.52781	0.0377337	0.414325
ENSLBEG00000015405	0	0	0	94.7532	1.22036	0.0377377	0.414325
ENSLBEG00000023049	cytosolic purine 5'-nucleotidase-like [Source:NCBI gene;Acc:109981203]	nt5c2l1	nt5c2l1	11.6481	-1.25174	0.0377895	0.414325
ENSLBEG00000013313	0	0	0	19.8609	0.710638	0.0377982	0.414325
ENSLBEG00000002004	neurotrophic receptor tyrosine kinase 1 [Source:NCBI gene;Acc:109988831]	ntrk1	ntrk1	20.4872	0.821127	0.0378067	0.414325
ENSLBEG00000008158	zinc finger CCHC domain-containing protein 24-like [Source:NCBI gene;Acc:109992985]	0	0	16.6112	0.692806	0.0378203	0.414325
ENSLBEG00000013177	testicular acid phosphatase homolog [Source:NCBI gene;Acc:109986785]	0	0	16.1685	-0.773538	0.0378378	0.414325
ENSLBEG00000008806	leucine rich repeat containing G protein-coupled receptor 6 [Source:NCBI gene;Acc:109984923]	LGR6	LGR6	7.35646	1.3453	0.0378768	NA
ENSLBEG00000003303	E3 ubiquitin-protein ligase TRIM21-like [Source:NCBI gene;Acc:109988861]	0	0	74.3149	-0.44998	0.0378842	0.414427
ENSLBEG00000009914	bactericidal permeability-increasing protein-like [Source:NCBI gene;Acc:109983181]	0	0	75.579	0.661497	0.0378969	0.414427
ENSLBEG00000004956	coiled-coil and C2 domain containing 1A [Source:NCBI gene;Acc:110000443]	0	0	792.137	-0.216443	0.0379869	0.415089
ENSLBEG00000026563	NSE1 homolog, SMC5-SMC6 complex component [Source:NCBI gene;Acc:110001405]	nsmce1	nsmce1	94.4817	0.423508	0.0380073	0.415089
ENSLBEG00000001254	interleukin-13 receptor subunit alpha-1-like [Source:NCBI gene;Acc:109992806]	0	0	785.534	-0.306505	0.0380957	0.415633
ENSLBEG00000020768	syntaxin-binding protein 5-like [Source:NCBI gene;Acc:109987371]	stxbp5l	stxbp5l	12.7896	0.898076	0.0381252	0.415633
ENSLBEG00000014747	integral membrane protein GPR137B-like [Source:NCBI gene;Acc:109996562]	gpr137c	gpr137c	307.411	-0.640081	0.0381395	0.415633
ENSLBEG00000028717	0	0	0	555.432	0.479567	0.0381611	0.415633
ENSLBEG00000011693	fucosyltransferase 11 [Source:NCBI gene;Acc:109996467]	fut11	fut11	30.6547	0.443003	0.0382327	0.415633
ENSLBEG00000009797	PMS1 homolog 2, mismatch repair system component [Source:NCBI gene;Acc:109994692]	pms2	pms2	75.472	0.412607	0.0382405	0.415633
ENSLBEG00000015194	0	0	0	259.219	-1.98369	0.0382585	0.415633
ENSLBEG00000012494	plexin-B2-like [Source:NCBI gene;Acc:109993100]	plxnb2b	plxnb2b	1889.07	-0.275723	0.0382804	0.415633
ENSLBEG00000003648	myelin protein zero-like protein 2 [Source:NCBI gene;Acc:109981412]	mpzl2b	mpzl2b	510.56	0.24562	0.0382817	0.415633
ENSLBEG00000023882	connective tissue growth factor [Source:NCBI gene;Acc:109982940]	ctgfa	ctgfa	198.344	0.737913	0.0383734	0.416357
ENSLBEG00000020267	borealin-2-like [Source:NCBI gene;Acc:109981643]	0	0	10.3713	1.17166	0.0384315	0.416457
ENSLBEG00000006184	WAS/WASL-interacting protein family member 3-like [Source:NCBI gene;Acc:109994616]	sb:cb649	sb:cb649	28.1707	0.779743	0.0384805	0.416457
ENSLBEG00000026727	signal recognition particle 19 [Source:NCBI gene;Acc:109990990]	srp19	srp19	500.719	0.234673	0.0384988	0.416457
ENSLBEG00000013176	RAB23, member RAS oncogene family [Source:NCBI gene;Acc:109983211]	rab23	rab23	46.8552	0.489296	0.0385063	0.416457
ENSLBEG00000004747	cyclin-Y [Source:NCBI gene;Acc:109981969]	ccny	ccny	123.093	0.284432	0.0385076	0.416457
ENSLBEG00000008258	X-box binding protein 1 [Source:NCBI gene;Acc:109986102]	xbp1	xbp1	5582.02	0.304749	0.0385366	0.4165
ENSLBEG00000001244	DExD-box helicase 21 [Source:NCBI gene;Acc:109987463]	ddx21	ddx21	3659.87	0.644045	0.0385905	0.416812
ENSLBEG00000010618	CUGBP Elav-like family member 2 [Source:NCBI gene;Acc:110003753]	0	0	1452.59	-0.203015	0.0387308	0.418057
ENSLBEG00000019970	protein S100-A1-like [Source:NCBI gene;Acc:110002605]	s100a1	s100a1	59.3865	-2.26015	0.038797	0.418499
ENSLBEG00000013203	0	0	0	278.003	-0.474686	0.0388474	0.418773
ENSLBEG00000020628	protein FAM110B-like [Source:NCBI gene;Acc:109985076]	FAM110A	FAM110A	67.2021	0.484599	0.0388866	0.418924
ENSLBEG00000018014	ETS-related transcription factor Elf-2-like [Source:NCBI gene;Acc:109998805]	elf2b	elf2b	680.068	-0.259369	0.03892	0.419013
ENSLBEG00000026653	0	0	0	8.09483	0.957843	0.0389593	NA
ENSLBEG00000016808	von Willebrand factor C domain-containing protein 2-like [Source:NCBI gene;Acc:109985028]	zgc:113531	zgc:113531	6.90475	1.23411	0.0389748	NA
ENSLBEG00000022978	abhydrolase domain containing 14B [Source:NCBI gene;Acc:109980605]	abhd14b	abhd14b	201.366	0.4128	0.0390554	0.419883
ENSLBEG00000025352	thrombospondin type laminin G domain and EAR repeats [Source:NCBI gene;Acc:109985191]	0	0	67.6865	0.46373	0.0390624	0.419883
ENSLBEG00000003282	0	0	0	513.13	-0.422534	0.0390765	0.419883
ENSLBEG00000013308	interleukin-10 receptor subunit beta-like [Source:NCBI gene;Acc:109982631]	0	0	128.917	0.294456	0.0391244	0.419908
ENSLBEG00000001882	endonuclease domain-containing 1 protein-like [Source:NCBI gene;Acc:109991042]	0	0	120.885	-2.19021	0.0391724	0.419908
ENSLBEG00000003333	ADP/ATP translocase 2-like [Source:NCBI gene;Acc:109983577]	SLC25A5	SLC25A5	13264.5	0.48758	0.0392138	0.419908
ENSLBEG00000028193	0	0	0	238.383	0.592007	0.0392328	0.419908
ENSLBEG00000019024	0	0	0	5.02709	1.09017	0.0392349	NA
ENSLBEG00000015641	glutathione peroxidase 8 (putative) [Source:NCBI gene;Acc:109997673]	gpx8	gpx8	84.9444	0.430023	0.0392417	0.419908
ENSLBEG00000027136	phosphoethanolamine N-methyltransferase 3-like [Source:NCBI gene;Acc:109992610]	pmt	pmt	463.948	0.61111	0.0392527	0.419908
ENSLBEG00000007726	cAMP-dependent protein kinase type II-alpha regulatory subunit-like [Source:NCBI gene;Acc:109993562]	prkar2aa	prkar2aa	2481.82	-0.345563	0.0392552	0.419908
ENSLBEG00000001317	ubiquitin-conjugating enzyme E2 R1-like [Source:NCBI gene;Acc:109984074]	cdc34b	cdc34b	765.238	-0.339352	0.0393501	0.420652
ENSLBEG00000003245	polypeptide N-acetylgalactosaminyltransferase 17 [Source:NCBI gene;Acc:109998590]	galnt17	galnt17	50.7505	-0.803289	0.0393784	0.420685
ENSLBEG00000019917	complement C1q-like protein 4 [Source:NCBI gene;Acc:109993792]	c1ql4b	c1ql4b	55.5174	0.539903	0.0394203	0.420863
ENSLBEG00000022721	0	0	0	8.94081	0.94286	0.0394587	NA
ENSLBEG00000014462	T-lymphoma invasion and metastasis-inducing protein 1-like [Source:NCBI gene;Acc:109988373]	tiam1a	tiam1a	593.723	-0.239721	0.0394976	0.421417
ENSLBEG00000016853	elongation factor 2-like [Source:NCBI gene;Acc:109982733]	0	0	24086.4	0.305241	0.0395914	0.422148
ENSLBEG00000023655	VPS50, EARP/GARPII complex subunit [Source:NCBI gene;Acc:109982458]	vps50	vps50	280.691	-0.222317	0.0396619	0.422373
ENSLBEG00000027399	ribosomal protein L15 [Source:NCBI gene;Acc:109987533]	rpl15	rpl15	1950.19	0.628857	0.0396782	0.422373
ENSLBEG00000013128	glucose-6-phosphate exchanger SLC37A4-like [Source:NCBI gene;Acc:109990682]	slc37a4a	slc37a4a	201.536	-0.387155	0.0396942	0.422373
ENSLBEG00000007508	0	0	0	14.566	1.86412	0.039738	0.422373
ENSLBEG00000014351	phosphatidylinositol transfer protein beta isoform-like [Source:NCBI gene;Acc:109998198]	pitpnb	pitpnb	166.723	-0.518801	0.0397393	0.422373
ENSLBEG00000011593	seryl-tRNA synthetase 2, mitochondrial [Source:NCBI gene;Acc:109991926]	sars2	sars2	132.294	0.512557	0.0397766	0.422499
ENSLBEG00000026823	KRR1 small subunit processome component homolog [Source:NCBI gene;Acc:109995703]	krr1	krr1	202.145	0.28879	0.0398474	0.422981
ENSLBEG00000002903	m-AAA protease-interacting protein 1, mitochondrial-like [Source:NCBI gene;Acc:109988838]	0	0	35.9583	0.498921	0.0399337	0.423628
ENSLBEG00000003142	centriole, cilia and spindle-associated protein b [Source:ZFIN;Acc:ZDB-GENE-081107-51]	ccsapb	ccsapb	59.2017	-0.530049	0.0400399	0.424024
ENSLBEG00000017744	0	0	0	7.96784	1.41219	0.0400417	NA
ENSLBEG00000007415	potassium channel tetramerization domain containing 9 [Source:NCBI gene;Acc:109982079]	kctd9a	kctd9a	156.366	0.338076	0.0400418	0.424024
ENSLBEG00000002860	CTP synthase 1-like [Source:NCBI gene;Acc:109999776]	ctps1b	ctps1b	214.288	0.405263	0.0400474	0.424024
ENSLBEG00000020137	solute carrier family 25 member 24 [Source:NCBI gene;Acc:109997161]	0	0	258.017	0.343587	0.0400874	0.424045
ENSLBEG00000002719	interleukin-13 receptor subunit alpha-2-like [Source:NCBI gene;Acc:109983597]	il13ra2	il13ra2	88.7437	0.951368	0.0401003	0.424045
ENSLBEG00000000542	0	0	0	246.792	-2.44779	0.0401537	0.424295
ENSLBEG00000026082	ceramide synthase 2-like [Source:NCBI gene;Acc:109986498]	cers2b	cers2b	326.964	0.390779	0.0401749	0.424295
ENSLBEG00000025969	0	0	0	57.9327	-1.0749	0.0403192	0.425549
ENSLBEG00000007107	ribosomal protein S6 kinase alpha-5-like [Source:NCBI gene;Acc:109977551]	rps6ka5	rps6ka5	122.583	-0.400127	0.0403544	0.42565
ENSLBEG00000022766	granzyme A-like [Source:NCBI gene;Acc:109991586]	0	0	34.7725	-1.11543	0.0404904	0.426815
ENSLBEG00000012399	SH3 domain-binding protein 5-like [Source:NCBI gene;Acc:109993613]	gtf2h4	gtf2h4	20.5581	-0.708519	0.0405297	0.426959
ENSLBEG00000003735	protein arginine methyltransferase 3 [Source:NCBI gene;Acc:109997448]	prmt3	prmt3	72.0165	0.583516	0.0406515	0.427917
ENSLBEG00000015125	junctional adhesion molecule B-like [Source:NCBI gene;Acc:109990180]	jam2a	jam2a	66.9099	0.437588	0.0406982	0.427917
ENSLBEG00000000058	proton myo-inositol cotransporter-like [Source:NCBI gene;Acc:109987656]	SLC2A13	SLC2A13	42.3761	0.497211	0.0407252	0.427917
ENSLBEG00000001205	prosaposin receptor GPR37-like [Source:NCBI gene;Acc:109991693]	gpr37b	gpr37b	52.5864	-0.450313	0.0407472	0.427917
ENSLBEG00000026306	ectonucleotide pyrophosphatase/phosphodiesterase family member 2-like [Source:NCBI gene;Acc:109995674]	0	0	41.6077	0.627803	0.0407578	0.427917
ENSLBEG00000020119	nuclear apoptosis inducing factor 1 [Source:NCBI gene;Acc:109988559]	naif1	naif1	10.0126	-0.778321	0.0408064	0.427917
ENSLBEG00000023195	GRAM domain-containing protein 3-like [Source:NCBI gene;Acc:109998925]	0	0	138.912	0.346061	0.0408163	0.427917
ENSLBEG00000006273	plakophilin 4 [Source:NCBI gene;Acc:109991769]	PKP4	PKP4	319.53	0.35037	0.0408468	0.427917
ENSLBEG00000000308	0	0	0	7.16849	-0.979813	0.0408604	NA
ENSLBEG00000028200	arf-GAP domain and FG repeat-containing protein 2-like [Source:NCBI gene;Acc:109980719]	0	0	133.013	0.407051	0.0408843	0.427917
ENSLBEG00000009741	ribosomal protein L23 [Source:NCBI gene;Acc:109998089]	rpl23	rpl23	8072.82	0.529154	0.0408891	0.427917
ENSLBEG00000003975	roundabout homolog 1-like [Source:NCBI gene;Acc:109994609]	robo1	robo1	233.822	-0.39679	0.0409255	0.427917
ENSLBEG00000026115	0	0	0	329.208	0.476609	0.0409289	0.427917
ENSLBEG00000023728	histamine N-methyltransferase [Source:NCBI gene;Acc:109986950]	hnmt	hnmt	1686.55	-0.414248	0.0409928	0.428061
ENSLBEG00000022201	arginine vasopressin receptor 1A [Source:NCBI gene;Acc:110004673]	avpr1ab	avpr1ab	197.269	0.589367	0.0410382	0.428061
ENSLBEG00000026707	glutamate dehydrogenase, mitochondrial [Source:NCBI gene;Acc:109993316]	glud1b	glud1b	5420.06	0.447979	0.0410437	0.428061
ENSLBEG00000014665	uncharacterized LOC109985601 [Source:NCBI gene;Acc:109985601]	0	0	24.8598	-0.606208	0.0410455	0.428061
ENSLBEG00000022037	0	0	0	187.857	-1.41102	0.0410939	0.428297
ENSLBEG00000022812	family with sequence similarity 136 member A [Source:NCBI gene;Acc:109981194]	fam136a	fam136a	87.1477	0.631586	0.0411833	0.428864
ENSLBEG00000005684	MRG domain binding protein [Source:NCBI gene;Acc:109976843]	mrgbp	mrgbp	1003.88	-0.17477	0.0411998	0.428864
ENSLBEG00000023921	oxidoreductase like domain containing 1 [Source:NCBI gene;Acc:109979499]	0	0	12.6882	-0.690293	0.0412476	0.429024
ENSLBEG00000015265	cytosolic thiouridylase subunit 2 [Source:NCBI gene;Acc:109987190]	ctu2	ctu2	127.675	0.287638	0.0412782	0.429024
ENSLBEG00000018838	nuclear receptor coactivator 3 [Source:NCBI gene;Acc:109989167]	0	0	510.9	-0.344485	0.0412924	0.429024
ENSLBEG00000020973	anaphase-promoting complex subunit 1-like [Source:NCBI gene;Acc:109998333]	anapc1	anapc1	99.3523	0.280919	0.0413587	0.429445
ENSLBEG00000022274	spindlin-1-like [Source:NCBI gene;Acc:109988537]	0	0	46.8149	-0.477905	0.0414336	0.429955
ENSLBEG00000012202	alpha-1,3-mannosyl-glycoprotein 2-beta-N-acetylglucosaminyltransferase-like [Source:NCBI gene;Acc:109993627]	mgat1b	mgat1b	211.419	0.296024	0.0415133	0.430089
ENSLBEG00000012700	far upstream element binding protein 1 [Source:NCBI gene;Acc:109976604]	fubp1	fubp1	1949.82	0.283746	0.0415266	0.430089
ENSLBEG00000025591	glucokinase regulator [Source:NCBI gene;Acc:109997301]	0	0	295.342	-0.262854	0.0415368	0.430089
ENSLBEG00000017823	DEAD-box helicase 6 [Source:NCBI gene;Acc:110003038]	ddx6	ddx6	723.901	-0.28098	0.0415499	0.430089
ENSLBEG00000014036	chloride intracellular channel 4 [Source:NCBI gene;Acc:109992432]	clic4	clic4	628.197	0.38385	0.0416005	0.430346
ENSLBEG00000002975	0	0	0	282.723	-0.395713	0.0417499	0.431159
ENSLBEG00000009775	glutamyl-tRNA synthetase 2, mitochondrial [Source:NCBI gene;Acc:109991899]	zgc:153247	zgc:153247	47.2241	0.61205	0.0417737	0.431159
ENSLBEG00000017844	golgi reassembly stacking protein 2 [Source:NCBI gene;Acc:109997098]	0	0	67.2721	0.466265	0.0417927	0.431159
ENSLBEG00000019281	G-protein coupled receptor 98-like [Source:NCBI gene;Acc:109997776]	0	0	78.8998	0.599031	0.0418046	0.431159
ENSLBEG00000027213	carboxypeptidase D [Source:NCBI gene;Acc:109988000]	cpda	cpda	1277	0.201416	0.0418191	0.431159
ENSLBEG00000008938	endosome associated trafficking regulator 1 [Source:NCBI gene;Acc:109995889]	0	0	239.909	-0.228762	0.0418345	0.431159
ENSLBEG00000007695	anosmin-1-like [Source:NCBI gene;Acc:110002868]	ANOS1	ANOS1	7.49107	1.27454	0.041877	NA
ENSLBEG00000011016	zinc finger protein basonuclin-1-like [Source:NCBI gene;Acc:110001665]	BNC1	BNC1	35.3203	0.823916	0.0419516	0.432099
ENSLBEG00000009545	DNA-directed RNA polymerase III subunit RPC4-like [Source:NCBI gene;Acc:109996958]	zgc:171971	zgc:171971	273.766	-0.262522	0.0421631	0.432747
ENSLBEG00000004928	GRAM domain containing 4b [Source:ZFIN;Acc:ZDB-GENE-030131-4780]	gramd4b	gramd4b	95.1973	-0.418407	0.0421645	0.432747
ENSLBEG00000014015	kelch-like protein 9 [Source:NCBI gene;Acc:109982653]	si:rp71-68n21.9	si:rp71-68n21.9	571.036	-0.352176	0.0421665	0.432747
ENSLBEG00000013609	methionyl-tRNA synthetase [Source:NCBI gene;Acc:109986211]	mars	mars	139.817	0.556819	0.042187	0.432747
ENSLBEG00000020339	atlastin GTPase 2 [Source:NCBI gene;Acc:109990817]	atl2	atl2	632.239	-0.361266	0.042206	0.432747
ENSLBEG00000027337	keratin, type I cytoskeletal 13-like [Source:NCBI gene;Acc:110001441]	0	0	50.4225	1.94401	0.0422224	0.432747
ENSLBEG00000015695	probable E3 SUMO-protein ligase RNF212 [Source:NCBI gene;Acc:110000063]	0	0	27.0242	-0.668403	0.0422313	0.432747
ENSLBEG00000002759	elongation factor 1-alpha [Source:NCBI gene;Acc:109994072]	0	0	50704	0.254657	0.0422331	0.432747
ENSLBEG00000019101	0	0	0	219.503	-0.329847	0.0422599	0.432747
ENSLBEG00000000159	F-box protein 31 [Source:NCBI gene;Acc:109989444]	fbxo31	fbxo31	934.579	-0.286714	0.0422743	0.432747
ENSLBEG00000010138	homeobox protein Hox-C3a-like [Source:NCBI gene;Acc:109984933]	0	0	8.76972	1.13112	0.0422989	NA
ENSLBEG00000001419	aldehyde dehydrogenase 6 family member A1 [Source:NCBI gene;Acc:109981392]	ALDH6A1	ALDH6A1	1860.17	0.54192	0.0423112	0.432859
ENSLBEG00000013672	mitochondrial sodium/hydrogen exchanger 9B2-like [Source:NCBI gene;Acc:109975867]	0	0	19.4708	1.22433	0.0423721	0.433057
ENSLBEG00000028077	0	0	0	662.9	-0.903031	0.04242	0.433057
ENSLBEG00000026335	histone-lysine N-methyltransferase 2A-like [Source:NCBI gene;Acc:109988011]	kmt2a	kmt2a	201.501	-0.384567	0.0424515	0.433057
ENSLBEG00000011592	dedicator of cytokinesis 2 [Source:NCBI gene;Acc:109993004]	DOCK2	DOCK2	1001.47	-0.288535	0.0424576	0.433057
ENSLBEG00000025688	vacuolar protein sorting-associated protein 37D-like [Source:NCBI gene;Acc:109993955]	si:ch211-284f22.3	si:ch211-284f22.3	9.84161	0.958717	0.0424607	0.433057
ENSLBEG00000017123	protein O-linked-mannose beta-1,2-N-acetylglucosaminyltransferase 1-like [Source:NCBI gene;Acc:110003828]	pomgnt1	pomgnt1	65.7339	-0.645691	0.0426122	0.434337
ENSLBEG00000018567	Rho GTPase activating protein 10 [Source:NCBI gene;Acc:109980042]	arhgap10	arhgap10	520.586	-0.252655	0.0427966	0.435296
ENSLBEG00000024317	myosin regulatory light chain interacting protein [Source:NCBI gene;Acc:110001941]	mylipa	mylipa	267.625	0.77952	0.0428446	0.435296
ENSLBEG00000024173	0	0	0	4523.87	-1.52803	0.0428676	0.435296
ENSLBEG00000017404	uncharacterized LOC109993150 [Source:NCBI gene;Acc:109993150]	0	0	464.787	-0.583972	0.0428885	0.435296
ENSLBEG00000028783	spondin-1-like [Source:NCBI gene;Acc:109992762]	0	0	1169.79	-0.401646	0.0429196	0.435296
ENSLBEG00000023067	0	0	0	82.8055	-0.902272	0.0429262	0.435296
ENSLBEG00000027792	post-GPI attachment to proteins 1 [Source:NCBI gene;Acc:109983485]	pgap1	pgap1	65.3289	-0.499773	0.0429284	0.435296
ENSLBEG00000006851	islet cell autoantigen 1 [Source:NCBI gene;Acc:109998692]	ica1	ica1	9.81102	0.975979	0.0429358	0.435296
ENSLBEG00000017962	apolipoprotein A-I-like [Source:NCBI gene;Acc:109975216]	0	0	2524.5	-1.29422	0.0429835	0.435296
ENSLBEG00000018554	L antigen family member 3 [Source:NCBI gene;Acc:109976418]	0	0	21.5379	0.772956	0.0429936	0.435296
ENSLBEG00000018387	mRNA decay activator protein ZFP36L1-like [Source:NCBI gene;Acc:109988479]	zgc:114130	zgc:114130	128.058	0.384929	0.0430225	0.435296
ENSLBEG00000014051	SRR1 domain containing [Source:NCBI gene;Acc:109995996]	srrd	srrd	36.0213	0.572678	0.0430417	0.435296
ENSLBEG00000020217	perforin 1.2 [Source:ZFIN;Acc:ZDB-GENE-111212-3]	prf1.2	prf1.2	88.1708	1.95443	0.0430461	0.435296
ENSLBEG00000022620	receptor activity modifying protein 2 [Source:NCBI gene;Acc:109997840]	ramp2	ramp2	206.622	0.394441	0.0431021	0.435598
ENSLBEG00000009738	0	0	0	35.0802	-0.493317	0.0431896	0.435618
ENSLBEG00000024398	ribosomal protein L7a [Source:NCBI gene;Acc:109984459]	RPL7A	RPL7A	19290.7	0.320678	0.0432052	0.435618
ENSLBEG00000013235	0	0	0	9.7693	1.16813	0.0432075	0.435618
ENSLBEG00000014168	cytochrome c oxidase copper chaperone [Source:NCBI gene;Acc:109982627]	cox17	cox17	445.917	0.491157	0.0432087	0.435618
ENSLBEG00000018163	family with sequence similarity 110 member B [Source:NCBI gene;Acc:109981318]	fam110b	fam110b	5.93253	-1.22333	0.0432425	NA
ENSLBEG00000004140	selenoprotein P [Source:NCBI gene;Acc:109993483]	SELENOP	SELENOP	20914.7	-0.618073	0.0433145	0.436421
ENSLBEG00000004905	myosin-11-like [Source:NCBI gene;Acc:109994099]	0	0	77.4299	-2.03697	0.0433597	0.436612
ENSLBEG00000015697	TRAF2 and NCK-interacting protein kinase-like [Source:NCBI gene;Acc:109993142]	TNIK	TNIK	41.4114	-0.485831	0.0434917	0.437676
ENSLBEG00000020022	zinc finger protein 622 [Source:NCBI gene;Acc:110001208]	znf622	znf622	284.409	0.281427	0.0436877	0.439259
ENSLBEG00000011380	NADH dehydrogenase [ubiquinone] 1 beta subcomplex subunit 5, mitochondrial-like [Source:NCBI gene;Acc:109980386]	NDUFB5	NDUFB5	118.131	0.645112	0.0437147	0.439259
ENSLBEG00000021708	apoptosis regulator BAX-like [Source:NCBI gene;Acc:109998905]	zgc:153993	zgc:153993	36.565	-0.646011	0.0437281	0.439259
ENSLBEG00000022995	solute carrier family 4 member 1 adaptor protein [Source:NCBI gene;Acc:109989716]	slc4a1ap	slc4a1ap	447.236	0.284824	0.0438988	0.440525
ENSLBEG00000019408	rho-related GTP-binding protein Rho6-like [Source:NCBI gene;Acc:109989185]	rnd1a	rnd1a	22.9104	0.705397	0.0439071	0.440525
ENSLBEG00000008135	natterin-3-like [Source:NCBI gene;Acc:110004882]	0	0	1328.7	-1.65878	0.0439634	0.440536
ENSLBEG00000021637	tetratricopeptide repeat domain 7B [Source:NCBI gene;Acc:109990855]	ttc7b	ttc7b	621.774	-0.275932	0.0439873	0.440536
ENSLBEG00000028910	histone-lysine N-methyltransferase 2D-like [Source:NCBI gene;Acc:109979710]	0	0	105.816	-0.484517	0.04401	0.440536
ENSLBEG00000019888	0	0	0	67.9732	1.59549	0.044014	0.440536
ENSLBEG00000024208	xyloside xylosyltransferase 1 [Source:NCBI gene;Acc:109987955]	xxylt1	xxylt1	142.97	-0.365366	0.0440506	0.440638
ENSLBEG00000023595	zinc finger and BTB domain-containing protein 34-like [Source:NCBI gene;Acc:109983336]	zbtb34	zbtb34	159.558	-0.67421	0.0440956	0.440706
ENSLBEG00000028816	0	0	0	54.3877	-1.72515	0.044111	0.440706
ENSLBEG00000023892	X-ray repair cross complementing 2 [Source:NCBI gene;Acc:110005396]	0	0	136.916	0.531942	0.0441506	0.440706
ENSLBEG00000020299	NSA2, ribosome biogenesis homolog [Source:NCBI gene;Acc:109996662]	nsa2	nsa2	7475.53	0.655942	0.0441719	0.440706
ENSLBEG00000011494	dipeptidase 2-like [Source:NCBI gene;Acc:109982762]	dpep2	dpep2	237.986	0.656236	0.0441897	0.440706
ENSLBEG00000010667	RNA binding motif protein 25 [Source:NCBI gene;Acc:109978887]	rbm25b	rbm25b	913.963	0.353647	0.0442361	0.440905
ENSLBEG00000015274	0	0	0	40.9033	0.774023	0.0442797	0.441075
ENSLBEG00000016589	CUE domain containing 1 [Source:NCBI gene;Acc:109986271]	cuedc1b	cuedc1b	822.903	-0.221206	0.0443711	0.441721
ENSLBEG00000014623	signal sequence receptor subunit 4 [Source:NCBI gene;Acc:110001759]	ssr4	ssr4	707.064	0.399068	0.0444057	0.441803
ENSLBEG00000022607	selenoprotein T2-like [Source:NCBI gene;Acc:110004806]	selenot2	selenot2	127.662	0.451364	0.0444665	0.442058
ENSLBEG00000004568	myeloid associated differentiation marker [Source:NCBI gene;Acc:109997477]	si:dkeyp-66d1.7	si:dkeyp-66d1.7	226.749	0.527226	0.0444999	0.442058
ENSLBEG00000017200	nucleoporin 43 [Source:NCBI gene;Acc:109988421]	nup43	nup43	66.852	0.397286	0.044511	0.442058
ENSLBEG00000027898	ectonucleoside triphosphate diphosphohydrolase 3-like [Source:NCBI gene;Acc:110001464]	entpd3	entpd3	51.4119	0.614621	0.0445478	0.442159
ENSLBEG00000016552	inositol 1,4,5-trisphosphate receptor type 2-like [Source:NCBI gene;Acc:110003801]	itpr2	itpr2	134.223	-0.400231	0.0446267	0.442679
ENSLBEG00000008708	0	0	0	49.5997	-1.0473	0.0446585	0.442731
ENSLBEG00000012330	prohibitin-2-like [Source:NCBI gene;Acc:110002892]	0	0	154.15	0.502319	0.0446992	0.44287
ENSLBEG00000010563	SUMO-conjugating enzyme UBC9-like [Source:NCBI gene;Acc:109996986]	0	0	1330.18	-0.166322	0.0447539	0.443149
ENSLBEG00000005844	0	0	0	90.0628	-0.342502	0.0447924	0.443266
ENSLBEG00000012825	GTPase IMAP family member 4-like [Source:NCBI gene;Acc:110005027]	0	0	62.0036	-0.787694	0.0449451	0.443644
ENSLBEG00000010936	CLN8, transmembrane ER and ERGIC protein [Source:NCBI gene;Acc:109995955]	cln8	cln8	367.248	-0.343834	0.0449453	0.443644
ENSLBEG00000019734	0	0	0	29.953	-0.730636	0.0449547	0.443644
ENSLBEG00000026002	ras homolog gene family, member Gc [Source:ZFIN;Acc:ZDB-GENE-030131-3402]	rhogc	rhogc	310.365	-0.365071	0.0449634	0.443644
ENSLBEG00000002563	gap junction Cx32.2 protein-like [Source:NCBI gene;Acc:109994048]	0	0	157.806	0.51828	0.0449637	0.443644
ENSLBEG00000008133	0	0	0	12.5905	-1.61835	0.0450258	0.443993
ENSLBEG00000016550	coiled-coil-helix-coiled-coil-helix domain-containing protein 1-like [Source:NCBI gene;Acc:109977286]	0	0	21.4286	0.688235	0.0450956	0.444419
ENSLBEG00000018736	0	0	0	17.331	1.1184	0.0451238	0.444433
ENSLBEG00000013146	prolargin-like [Source:NCBI gene;Acc:109984259]	prelp	prelp	39.0718	-0.80891	0.0451614	0.444541
ENSLBEG00000007581	0	0	0	89.5717	2.60086	0.0452123	0.444631
ENSLBEG00000001069	sushi, von Willebrand factor type A, EGF and pentraxin domain containing 1 [Source:NCBI gene;Acc:109988734]	svep1	svep1	89.7606	0.496354	0.045245	0.444631
ENSLBEG00000004136	transmembrane protein 104 [Source:NCBI gene;Acc:109994108]	tmem104	tmem104	587.928	-0.317395	0.0452506	0.444631
ENSLBEG00000005713	0	0	0	7.21463	-0.859143	0.0452913	NA
ENSLBEG00000012914	cytoplasmic dynein 1 intermediate chain 2-like [Source:NCBI gene;Acc:110001708]	dync1i2b	dync1i2b	61.3763	0.374867	0.0453075	0.444679
ENSLBEG00000024537	small nucleolar RNA, H/ACA box 8 [Source:HGNC Symbol;Acc:HGNC:32596]	RF00393	RF00393	49.9634	1.21253	0.0453089	0.444679
ENSLBEG00000003948	CD79a molecule [Source:NCBI gene;Acc:109996316]	cd79a	cd79a	280.224	-0.65231	0.0454029	0.445339
ENSLBEG00000025930	homeobox protein AKR-like [Source:NCBI gene;Acc:109997321]	tgif1	tgif1	35.796	0.534986	0.0454954	0.445778
ENSLBEG00000000081	chaperonin containing TCP1 subunit 6A [Source:NCBI gene;Acc:109985328]	cct6a	cct6a	1314.61	0.299506	0.0455301	0.445778
ENSLBEG00000008741	0	0	0	174.099	-0.527428	0.0456042	0.445778
ENSLBEG00000014594	gamma-glutamylamine cyclotransferase [Source:NCBI gene;Acc:110000002]	ggact.3	ggact.3	320.273	-0.757261	0.0456052	0.445778
ENSLBEG00000017027	death associated protein kinase 2 [Source:NCBI gene;Acc:109982273]	dapk2b	dapk2b	528.993	-0.31333	0.045631	0.445778
ENSLBEG00000004714	ribosomal protein L27 [Source:NCBI gene;Acc:109997995]	rpl27	rpl27	10415.1	0.419398	0.0456411	0.445778
ENSLBEG00000019929	0	0	0	32.4954	-1.03287	0.0457098	0.445778
ENSLBEG00000022045	lysozyme C-like [Source:NCBI gene;Acc:109988532]	0	0	485.684	1.35355	0.0457323	0.445778
ENSLBEG00000003811	family with sequence similarity 114 member A1 [Source:NCBI gene;Acc:109989960]	fam114a1	fam114a1	746.913	-0.37781	0.0457357	0.445778
ENSLBEG00000005570	phospholipid-transporting ATPase ID-like [Source:NCBI gene;Acc:109990039]	atp8b2	atp8b2	85.4577	-0.390519	0.0457435	0.445778
ENSLBEG00000028756	polypeptide N-acetylgalactosaminyltransferase 18-like [Source:NCBI gene;Acc:109992770]	galnt18a	galnt18a	28.4385	-0.637542	0.0457469	0.445778
ENSLBEG00000010781	sterol carrier protein 2 [Source:NCBI gene;Acc:109997153]	0	0	2083.95	-0.367652	0.0457689	0.445778
ENSLBEG00000017432	single-strand-selective monofunctional uracil-DNA glycosylase 1 [Source:NCBI gene;Acc:109992506]	smug1	smug1	29.0755	-0.62607	0.0458034	0.445829
ENSLBEG00000016187	sodium/hydrogen exchanger 3-like [Source:NCBI gene;Acc:109990214]	SLC9A3	SLC9A3	2081.03	0.762665	0.0458276	0.445829
ENSLBEG00000028476	Krueppel-like factor 15 [Source:NCBI gene;Acc:109988155]	KLF15	KLF15	212.354	0.938583	0.0459554	0.446811
ENSLBEG00000019688	origin recognition complex subunit 5 [Source:NCBI gene;Acc:109998854]	orc5	orc5	27.2164	0.625308	0.0460135	0.447115
ENSLBEG00000000372	TLC domain-containing protein 2-like [Source:NCBI gene;Acc:109985326]	0	0	15.3224	-1.35051	0.0460957	0.447652
ENSLBEG00000016473	ceramide-1-phosphate transfer protein-like [Source:NCBI gene;Acc:109997074]	gltpd2	gltpd2	77.8251	1.01016	0.046135	0.447726
ENSLBEG00000014042	fucose mutarotase [Source:ZFIN;Acc:ZDB-GENE-030616-618]	fuom	fuom	72.5708	-0.613684	0.0461918	0.447726
ENSLBEG00000008013	MYB binding protein 1a [Source:NCBI gene;Acc:109988945]	mybbp1a	mybbp1a	247.772	0.496515	0.0462201	0.447726
ENSLBEG00000005182	MAGUK p55 subfamily member 6-like [Source:NCBI gene;Acc:109994640]	0	0	106.705	0.340678	0.0462345	0.447726
ENSLBEG00000001461	liver-expressed antimicrobial peptide 2-like [Source:NCBI gene;Acc:109999216]	leap2	leap2	126.671	-0.835778	0.0462377	0.447726
ENSLBEG00000025220	endophilin-B1-like [Source:NCBI gene;Acc:109993923]	sh3glb1a	sh3glb1a	280.376	0.244248	0.0463526	0.448371
ENSLBEG00000007050	0	0	0	445.412	-0.383732	0.0463906	0.448371
ENSLBEG00000022823	cytoplasmic polyadenylation element-binding protein 4-like [Source:NCBI gene;Acc:109994433]	cpeb4a	cpeb4a	2113.63	-0.336583	0.0464209	0.448371
ENSLBEG00000021964	trinucleotide repeat containing 6A [Source:NCBI gene;Acc:109993848]	tnrc6a	tnrc6a	266.613	-0.614974	0.0464633	0.448371
ENSLBEG00000018452	transmembrane protein 238-like [Source:NCBI gene;Acc:110002552]	tmem238a	tmem238a	32.6131	-0.714707	0.0464785	0.448371
ENSLBEG00000004183	endophilin-A3-like [Source:NCBI gene;Acc:109995204]	0	0	386.914	-0.382927	0.0464859	0.448371
ENSLBEG00000016262	0	0	0	17.2072	0.820771	0.0464972	0.448371
ENSLBEG00000016102	ribosomal L24 domain containing 1 [Source:NCBI gene;Acc:110003695]	rsl24d1	rsl24d1	991.356	0.342081	0.0465197	0.448371
ENSLBEG00000015809	long-chain-fatty-acid--CoA ligase 6-like [Source:NCBI gene;Acc:109987282]	0	0	159.672	-0.395102	0.0465555	0.448457
ENSLBEG00000025246	pipecolic acid and sarcosine oxidase [Source:NCBI gene;Acc:109989289]	pipox	pipox	5416.29	-0.360577	0.0466203	0.44866
ENSLBEG00000010048	amyloid beta precursor protein binding family B member 1 interacting protein [Source:NCBI gene;Acc:109983780]	apbb1ip	apbb1ip	796.907	-0.219613	0.0466304	0.44866
ENSLBEG00000020383	C-type lectin domain family 10 member A-like [Source:NCBI gene;Acc:109986906]	0	0	42.9346	1.01654	0.0466679	0.448761
ENSLBEG00000023968	T cell activation inhibitor, mitochondrial [Source:ZFIN;Acc:ZDB-GENE-160113-67]	tcaim	tcaim	9.09849	0.873957	0.0466873	NA
ENSLBEG00000019061	F-box and leucine rich repeat protein 17 [Source:NCBI gene;Acc:109981581]	fbxl17	fbxl17	85.8542	-0.320206	0.0467107	0.448785
ENSLBEG00000003413	ring finger protein 19B [Source:NCBI gene;Acc:109994062]	rnf19b	rnf19b	73.1574	0.53433	0.0467243	0.448785
ENSLBEG00000014067	otoferlin-like [Source:NCBI gene;Acc:109983245]	otofa	otofa	6.75098	1.09335	0.046781	NA
ENSLBEG00000023472	protein phosphatase, Mg2+/Mn2+ dependent 1B [Source:NCBI gene;Acc:109996205]	ppm1ba	ppm1ba	1663.43	-0.270148	0.0468065	0.449098
ENSLBEG00000006870	RNA polymerase II elongation factor ELL-like [Source:NCBI gene;Acc:109999294]	si:ch211-13k12.2	si:ch211-13k12.2	179.359	-0.430816	0.0468618	0.449098
ENSLBEG00000000025	RAS guanyl releasing protein 1 [Source:NCBI gene;Acc:109981329]	RASGRP1	RASGRP1	435.566	-0.25346	0.046866	0.449098
ENSLBEG00000028401	ataxin 10 [Source:NCBI gene;Acc:109988137]	atxn10	atxn10	89.6237	0.371714	0.0468882	0.449098
ENSLBEG00000001144	0	0	0	19.88	-1.10898	0.0468917	0.449098
ENSLBEG00000000034	kinesin family member 21A [Source:NCBI gene;Acc:109987623]	0	0	717.96	-0.247607	0.0469508	0.449406
ENSLBEG00000010129	angiopoietin-related protein 5-like [Source:NCBI gene;Acc:109996449]	0	0	28.0648	1.2583	0.0470368	0.449775
ENSLBEG00000010455	aquaporin-12-like [Source:NCBI gene;Acc:109982567]	aqp12	aqp12	166.246	1.29457	0.0470783	0.449775
ENSLBEG00000015356	SPRY domain-containing SOCS box protein 4-like [Source:NCBI gene;Acc:109991984]	spsb4a	spsb4a	183.476	0.419167	0.0470965	0.449775
ENSLBEG00000001735	Labrus bergylta interferon gamma receptor 1 (ifngr1), transcript variant 2, mRNA. [Source:RefSeq mRNA;Acc:NM_001360872]	ifngr1	ifngr1	3426.98	-0.272464	0.0470988	0.449775
ENSLBEG00000023735	Tu translation elongation factor, mitochondrial [Source:NCBI gene;Acc:109998399]	tufm	tufm	328.295	0.391659	0.0471374	0.449775
ENSLBEG00000005982	tubby-related protein 4-like [Source:NCBI gene;Acc:109977672]	tulp4b	tulp4b	34.37	0.482939	0.0472012	0.449775
ENSLBEG00000007967	protein phosphatase, Mg2+/Mn2+ dependent 1D [Source:NCBI gene;Acc:109995336]	ppm1da	ppm1da	147.484	-0.297959	0.0472054	0.449775
ENSLBEG00000017876	peptidyl-prolyl cis-trans isomerase-like 2 [Source:NCBI gene;Acc:109989156]	ppil2	ppil2	498.953	-0.228853	0.0472054	0.449775
ENSLBEG00000001264	sphingomyelin phosphodiesterase acid like 3A [Source:NCBI gene;Acc:109999732]	smpdl3a	smpdl3a	731.79	-0.38368	0.0472496	0.449938
ENSLBEG00000009062	ATPase phospholipid transporting 8B1 [Source:NCBI gene;Acc:110000520]	atp8b1	atp8b1	818.37	-0.404607	0.0473457	0.450368
ENSLBEG00000004034	ADP ribosylation factor interacting protein 1 [Source:NCBI gene;Acc:109988260]	arfip1	arfip1	1392.87	-0.223035	0.0473488	0.450368
ENSLBEG00000000214	tRNA-splicing ligase RtcB homolog [Source:NCBI gene;Acc:110000338]	rtcb	rtcb	5.39279	1.09669	0.0473535	NA
ENSLBEG00000021517	collagen alpha-1(XXVI) chain-like [Source:NCBI gene;Acc:109985788]	0	0	5.64703	1.61736	0.0473935	NA
ENSLBEG00000017316	TSR2, ribosome maturation factor [Source:NCBI gene;Acc:110002529]	tsr2	tsr2	52.2847	0.644774	0.0474196	0.450784
ENSLBEG00000014841	prospero homeobox protein 1-like [Source:NCBI gene;Acc:109990171]	0	0	204.75	-0.470078	0.0474585	0.450896
ENSLBEG00000003849	GRIP1 associated protein 1 [Source:NCBI gene;Acc:109975529]	gripap1	gripap1	362.323	-0.356091	0.0475716	0.451713
ENSLBEG00000003945	protein FAM163A-like [Source:NCBI gene;Acc:109997985]	rabgap1l2	rabgap1l2	129.065	-0.570744	0.0476627	0.452108
ENSLBEG00000005316	protein phosphatase 2 regulatory subunit B'gamma [Source:NCBI gene;Acc:109990533]	PPP2R5C	PPP2R5C	1102.32	-0.176457	0.0477034	0.452108
ENSLBEG00000018251	cadherin 2 [Source:NCBI gene;Acc:109985096]	CDH2	CDH2	72.9879	0.594305	0.0477172	0.452108
ENSLBEG00000004769	lactation elevated protein 1-like [Source:NCBI gene;Acc:109977204]	afg1la	afg1la	209.44	-0.252521	0.0477588	0.452108
ENSLBEG00000025692	kynurenine 3-monooxygenase [Source:NCBI gene;Acc:109998438]	kmo	kmo	456.226	-0.296792	0.0477722	0.452108
ENSLBEG00000026692	heat shock protein family A (Hsp70) member 9 [Source:NCBI gene;Acc:109995690]	hspa9	hspa9	551.236	0.503881	0.0477761	0.452108
ENSLBEG00000012349	protein S [Source:NCBI gene;Acc:109985550]	pros1	pros1	400.911	0.452791	0.0479883	0.453859
ENSLBEG00000022905	probable ATP-dependent RNA helicase DDX5 [Source:NCBI gene;Acc:110001279]	ddx5	ddx5	1033.48	0.318049	0.0480973	0.454632
ENSLBEG00000014809	small nuclear ribonucleoprotein U1 subunit 70 [Source:NCBI gene;Acc:110002483]	0	0	1217.7	0.404732	0.0481439	0.454814
ENSLBEG00000018020	nesprin-2-like [Source:NCBI gene;Acc:110001169]	0	0	116.909	-0.413596	0.0482339	0.455405
ENSLBEG00000021681	ADAM metallopeptidase with thrombospondin type 1 motif 16 [Source:NCBI gene;Acc:109984431]	adamts16	adamts16	8.44968	-1.42488	0.0482627	NA
ENSLBEG00000013799	zinc finger HIT-type containing 6 [Source:NCBI gene;Acc:109983818]	znhit6	znhit6	58.1198	0.383128	0.0484033	0.456746
ENSLBEG00000024675	B-cell linker protein-like [Source:NCBI gene;Acc:109991585]	0	0	226.793	-0.470466	0.0484436	0.456867
ENSLBEG00000007855	UDP glycosyltransferase 8 [Source:NCBI gene;Acc:109994132]	ugt8	ugt8	1617.18	-0.283362	0.0484996	0.456919
ENSLBEG00000024241	PI-PLC X domain-containing protein 1-like [Source:NCBI gene;Acc:109982858]	plcxd1	plcxd1	43.5235	-0.854839	0.048548	0.456919
ENSLBEG00000002998	pleckstrin [Source:NCBI gene;Acc:109981884]	plek	plek	1099.16	-0.32481	0.0485508	0.456919
ENSLBEG00000014959	multidrug and toxin extrusion protein 1-like [Source:NCBI gene;Acc:109998225]	slc47a1	slc47a1	1995.08	-0.252259	0.0485588	0.456919
ENSLBEG00000024453	Yip1 domain family member 4 [Source:NCBI gene;Acc:109994483]	yipf4	yipf4	594.942	-0.216853	0.0486228	0.457211
ENSLBEG00000021119	ciliary neurotrophic factor receptor [Source:ZFIN;Acc:ZDB-GENE-030616-82]	cntfr	cntfr	26.1294	0.573121	0.0486448	0.457211
ENSLBEG00000028633	0	0	0	5.02916	-1.57539	0.0487166	NA
ENSLBEG00000009016	cAMP responsive element binding protein 5 [Source:NCBI gene;Acc:109986643]	creb5b	creb5b	7.37689	0.96334	0.048735	NA
ENSLBEG00000019306	la-related protein 4-like [Source:NCBI gene;Acc:109992508]	larp4ab	larp4ab	480.815	0.336437	0.0487671	0.457946
ENSLBEG00000004850	0	0	0	11.7854	-1.20404	0.0487779	0.457946
ENSLBEG00000000107	0	0	0	235.374	-0.397556	0.0488156	0.458041
ENSLBEG00000009283	protein orai-2-like [Source:NCBI gene;Acc:109988942]	orai2	orai2	380.012	-0.323443	0.0488606	0.458145
ENSLBEG00000001185	serine/threonine-protein kinase A-Raf-like [Source:NCBI gene;Acc:109994136]	araf	araf	193.328	-0.298397	0.0488817	0.458145
ENSLBEG00000010122	nectin cell adhesion molecule 2 [Source:NCBI gene;Acc:109995410]	si:ch73-22o12.1	si:ch73-22o12.1	809.204	-0.297694	0.0489655	0.458673
ENSLBEG00000008298	RWD domain containing 1 [Source:NCBI gene;Acc:110000506]	rwdd1	rwdd1	101.353	0.39348	0.0490607	0.459306
ENSLBEG00000013193	mitochondrial ribosomal protein L16 [Source:NCBI gene;Acc:109985537]	mrpl16	mrpl16	350.214	0.3759	0.0491479	0.459864
ENSLBEG00000009847	Fli-1 proto-oncogene, ETS transcription factor [Source:NCBI gene;Acc:109995366]	fli1a	fli1a	422.988	0.286862	0.0492715	0.460549
ENSLBEG00000000546	GTPase IMAP family member 4-like [Source:NCBI gene;Acc:109999210]	0	0	11.7693	0.7914	0.0492764	0.460549
ENSLBEG00000009712	0	0	0	7.74316	-0.927965	0.0493109	NA
ENSLBEG00000001860	kininogen-1-like [Source:NCBI gene;Acc:109998546]	0	0	55.661	1.31172	0.049334	0.460828
ENSLBEG00000000152	mitogen-activated protein kinase 8 [Source:NCBI gene;Acc:109992271]	mapk8b	mapk8b	27.8094	-0.58256	0.0494793	0.461927
ENSLBEG00000004280	bradykinin receptor B2 [Source:HGNC Symbol;Acc:HGNC:1030]	BDKRB2	BDKRB2	23.3325	0.881735	0.0495364	0.462201
ENSLBEG00000007334	KIAA0513 ortholog [Source:NCBI gene;Acc:109990137]	zgc:91860	zgc:91860	242.381	-0.286489	0.0496189	0.46249
ENSLBEG00000009882	acylglycerol kinase [Source:NCBI gene;Acc:109988327]	agk	agk	176.189	0.394799	0.0496229	0.46249
ENSLBEG00000008644	0	0	0	39.8812	0.760294	0.0496665	0.462637
ENSLBEG00000005859	endothelin converting enzyme 1 [Source:NCBI gene;Acc:109991180]	ece1	ece1	1356.63	0.271285	0.0497875	0.463287
ENSLBEG00000024126	myotrophin-like [Source:NCBI gene;Acc:110005405]	0	0	176.132	-0.802289	0.0497919	0.463287
ENSLBEG00000010717	0	0	0	16.2185	0.801204	0.0498613	0.463674
ENSLBEG00000024585	signal-induced proliferation-associated 1 [Source:HGNC Symbol;Acc:HGNC:10885]	zmp:0000001168	zmp:0000001168	449.552	-0.448113	0.0499938	0.464441
ENSLBEG00000016106	phosphatidylethanolamine N-methyltransferase [Source:NCBI gene;Acc:109994824]	pemt	pemt	424.767	0.552157	0.0499996	0.464441
ENSLBEG00000012792	zinc finger and SCAN domain-containing protein 5B-like [Source:NCBI gene;Acc:109996514]	0	0	36.0602	0.470149	0.0500524	0.464522
ENSLBEG00000024501	ligand-dependent corepressor-like [Source:NCBI gene;Acc:109996733]	0	0	524.278	-0.248249	0.0500641	0.464522
ENSLBEG00000015052	cardiomyopathy-associated protein 5-like [Source:NCBI gene;Acc:109998746]	cmya5	cmya5	18.8217	0.564756	0.0501406	0.464763
ENSLBEG00000007675	CD209 antigen-like protein E [Source:NCBI gene;Acc:110003683]	0	0	440.259	0.514011	0.0501458	0.464763
ENSLBEG00000026504	0	0	0	126.882	0.924413	0.0502093	0.465046
ENSLBEG00000013052	eukaryotic translation initiation factor 3 subunit L [Source:NCBI gene;Acc:109987211]	eif3s6ip	eif3s6ip	1897.31	0.539713	0.0502569	0.465046
ENSLBEG00000005293	FtsJ RNA methyltransferase homolog 1 [Source:NCBI gene;Acc:109986011]	ftsj1	ftsj1	116.754	0.517523	0.0502601	0.465046
ENSLBEG00000000102	0	0	0	8.04465	0.92211	0.0503202	NA
ENSLBEG00000020033	potassium voltage-gated channel, subfamily F, member 1a [Source:ZFIN;Acc:ZDB-GENE-041001-217]	kcnf1a	kcnf1a	10.6417	-0.784101	0.0503819	0.465914
ENSLBEG00000006955	zinc finger protein 644-like [Source:NCBI gene;Acc:109996063]	0	0	236.658	-0.313455	0.0504417	0.466208
ENSLBEG00000006770	septin-7-like [Source:NCBI gene;Acc:109998042]	sept15	sept15	432.573	-0.291127	0.0504923	0.466376
ENSLBEG00000018552	integrin subunit alpha 6 [Source:NCBI gene;Acc:109997095]	itga6a	itga6a	61.888	-0.848333	0.0505224	0.466376
ENSLBEG00000017195	SH3 domain-binding protein 5-like [Source:NCBI gene;Acc:109992036]	sh3bp5la	sh3bp5la	353.297	-0.226204	0.0505658	0.466376
ENSLBEG00000003880	solute carrier family 4 member 11 [Source:NCBI gene;Acc:109991051]	slc4a11	slc4a11	150.794	-0.386111	0.0505891	0.466376
ENSLBEG00000015996	transcription factor Ovo-like 2 [Source:NCBI gene;Acc:110002994]	0	0	158.371	-0.376278	0.0505999	0.466376
ENSLBEG00000001078	diphthine methyl ester synthase-like [Source:NCBI gene;Acc:109975400]	dph5	dph5	13.812	0.877324	0.0506311	0.466405
ENSLBEG00000020678	abhydrolase domain containing 3 [Source:NCBI gene;Acc:109999594]	abhd3	abhd3	7.71926	0.978926	0.0506412	NA
ENSLBEG00000019021	methyltransferase-like protein 7A [Source:NCBI gene;Acc:109992529]	0	0	911.687	-0.530196	0.0507095	0.46641
ENSLBEG00000022436	0	0	0	270.393	-0.453267	0.0507359	0.46641
ENSLBEG00000027785	serpin family G member 1 [Source:NCBI gene;Acc:109999132]	0	0	58.7708	0.740628	0.0507838	0.46641
ENSLBEG00000022000	zinc finger protein 395b [Source:ZFIN;Acc:ZDB-GENE-041001-193]	znf395b	znf395b	11.2504	1.4575	0.0508	0.46641
ENSLBEG00000006165	Dmx like 2 [Source:NCBI gene;Acc:109989455]	dmxl2	dmxl2	105.394	0.415647	0.0508291	0.46641
ENSLBEG00000006748	fasciculation and elongation protein zeta-2-like [Source:NCBI gene;Acc:109995325]	si:dkey-288i20.2	si:dkey-288i20.2	174.233	-0.299284	0.0508376	0.46641
ENSLBEG00000021058	TRAF2 and NCK interacting kinase a [Source:ZFIN;Acc:ZDB-GENE-030131-3767]	tnika	tnika	123.46	-0.509974	0.0508482	0.46641
ENSLBEG00000000217	0	0	0	12.9929	-1.0247	0.0508596	0.46641
ENSLBEG00000024616	inactive hydroxysteroid dehydrogenase-like protein 1 [Source:NCBI gene;Acc:109986395]	hsdl1	hsdl1	40.0993	0.630461	0.0508837	0.46641
ENSLBEG00000023440	cytokine inducible SH2 containing protein [Source:NCBI gene;Acc:109980553]	cish	cish	53.6156	0.892183	0.0509613	0.466865
ENSLBEG00000021145	0	0	0	68.8917	-0.58812	0.0510357	0.466999
ENSLBEG00000001561	dimethylglycine dehydrogenase [Source:NCBI gene;Acc:110000914]	dmgdh	dmgdh	378.258	0.875888	0.0510571	0.466999
ENSLBEG00000012411	protein kinase C alpha [Source:NCBI gene;Acc:109989054]	PRKCA	PRKCA	136.574	-0.466211	0.0510601	0.466999
ENSLBEG00000013658	protein kinase C iota [Source:NCBI gene;Acc:109985010]	prkci	prkci	442.764	-0.272383	0.0511157	0.467205
ENSLBEG00000007391	ankyrin repeat domain 39 [Source:NCBI gene;Acc:109982057]	ankrd39	ankrd39	106.242	-0.351156	0.051157	0.467205
ENSLBEG00000020560	glycine N-acyltransferase-like protein 3 [Source:NCBI gene;Acc:110003907]	0	0	230.063	-0.492894	0.0511735	0.467205
ENSLBEG00000003597	multiple inositol polyphosphate phosphatase 1-like [Source:NCBI gene;Acc:109981924]	minpp1a	minpp1a	178.109	0.382526	0.051224	0.467205
ENSLBEG00000028359	putative adenosylhomocysteinase 3 [Source:NCBI gene;Acc:109988123]	ahcyl2	ahcyl2	4396.56	-0.309987	0.0512265	0.467205
ENSLBEG00000028183	stromal antigen 1 [Source:NCBI gene;Acc:109987589]	stag1a	stag1a	66.1965	0.396709	0.0512509	0.467205
ENSLBEG00000001576	bcl-2-modifying factor-like [Source:NCBI gene;Acc:109987680]	0	0	21.6535	-1.0547	0.0513055	0.467408
ENSLBEG00000021358	NADPH dependent diflavin oxidoreductase 1 [Source:NCBI gene;Acc:109988536]	ndor1	ndor1	49.6874	0.558695	0.0513293	0.467408
ENSLBEG00000027085	plasmalemma vesicle associated protein b [Source:ZFIN;Acc:ZDB-GENE-060616-96]	plvapb	plvapb	91.963	0.344632	0.0514005	0.467801
ENSLBEG00000020394	RNA pseudouridylate synthase domain-containing protein 4-like [Source:NCBI gene;Acc:109990287]	rpusd4	rpusd4	59.6394	0.401994	0.0514917	0.467918
ENSLBEG00000027130	ribosomal protein L30 [Source:NCBI gene;Acc:109984517]	rpl30	rpl30	10306.4	0.233387	0.0514958	0.467918
ENSLBEG00000024202	ferredoxin reductase [Source:NCBI gene;Acc:109988570]	fdxr	fdxr	209.813	-0.31403	0.0514977	0.467918
ENSLBEG00000017523	Sec61 translocon alpha 1 subunit [Source:NCBI gene;Acc:109993770]	sec61a1	sec61a1	1278.81	0.291251	0.0515621	0.468027
ENSLBEG00000005479	polypeptide N-acetylgalactosaminyltransferase 15 [Source:NCBI gene;Acc:109994632]	0	0	26.0112	0.673082	0.0515802	0.468027
ENSLBEG00000011876	protein CutA homolog [Source:NCBI gene;Acc:109991326]	0	0	226.322	0.348225	0.0516006	0.468027
ENSLBEG00000016328	coiled-coil-helix-coiled-coil-helix domain-containing protein 1-like [Source:NCBI gene;Acc:110002509]	chchd1	chchd1	166.25	0.516638	0.051622	0.468027
ENSLBEG00000006762	arachidonate 5-lipoxygenase [Source:NCBI gene;Acc:109994650]	alox5a	alox5a	273.454	-0.338991	0.0517247	0.468533
ENSLBEG00000017975	0	0	0	14.1367	-0.596884	0.0517341	0.468533
ENSLBEG00000027252	actin-related protein 3-like [Source:NCBI gene;Acc:109983483]	ACTR3	ACTR3	3684.36	-0.226973	0.0518075	0.468759
ENSLBEG00000028527	rhophilin Rho GTPase binding protein 1 [Source:NCBI gene;Acc:110002129]	rhpn1	rhpn1	14.939	0.785565	0.0518359	0.468759
ENSLBEG00000022932	C-Jun-amino-terminal kinase-interacting protein 4-like [Source:NCBI gene;Acc:109988578]	SPAG9	SPAG9	663.186	-0.226174	0.0518435	0.468759
ENSLBEG00000024038	small nuclear ribonucleoprotein U11/U12 subunit 25 [Source:NCBI gene;Acc:109990377]	snrnp25	snrnp25	68.6549	-0.401426	0.0519513	0.469478
ENSLBEG00000017529	fumarylacetoacetate hydrolase [Source:NCBI gene;Acc:109989626]	fah	fah	82.9007	0.609473	0.0519967	0.469634
ENSLBEG00000008197	cytosolic sulfotransferase 1-like [Source:NCBI gene;Acc:109980901]	0	0	235.178	0.36915	0.0520558	0.469641
ENSLBEG00000022304	0	0	0	133.734	-1.92665	0.0520696	0.469641
ENSLBEG00000020614	cytokine-inducible SH2-containing protein-like [Source:NCBI gene;Acc:109990346]	CISH	CISH	7.86671	1.28809	0.0520971	NA
ENSLBEG00000008074	ubiquitin specific peptidase 32 [Source:NCBI gene;Acc:109995342]	usp32	usp32	447.237	-0.384872	0.0521429	0.469641
ENSLBEG00000022270	0	0	0	26.7937	0.562425	0.0521437	0.469641
ENSLBEG00000011212	0	0	0	448.178	-0.618866	0.0521471	0.469641
ENSLBEG00000020941	solute carrier family 25 member 34 [Source:NCBI gene;Acc:109990266]	slc25a34	slc25a34	807.645	0.586423	0.0521667	0.469641
ENSLBEG00000018623	metabotropic glutamate receptor 6-like [Source:NCBI gene;Acc:109983910]	grm6b	grm6b	5.11533	-1.19182	0.0521723	NA
ENSLBEG00000010744	sorting nexin-16-like [Source:NCBI gene;Acc:109977000]	0	0	7.35322	-0.874497	0.0522276	NA
ENSLBEG00000027374	MBT domain-containing protein 1-like [Source:NCBI gene;Acc:109987741]	mbtd1	mbtd1	82.4407	-0.54431	0.0522345	0.469997
ENSLBEG00000012076	very low density lipoprotein receptor [Source:NCBI gene;Acc:109996483]	vldlr	vldlr	157.154	0.351587	0.0522859	0.470206
ENSLBEG00000014179	succinate-semialdehyde dehydrogenase, mitochondrial-like [Source:NCBI gene;Acc:109978353]	aldh5a1	aldh5a1	37.4894	0.643011	0.052342	0.470457
ENSLBEG00000019973	out at first homolog [Source:NCBI gene;Acc:109998936]	oafa	oafa	190.449	-0.433112	0.0523832	0.470573
ENSLBEG00000008401	ras-GEF domain-containing family member 1B-A [Source:NCBI gene;Acc:110001626]	RASGEF1B	RASGEF1B	197.147	0.417478	0.0524515	0.470732
ENSLBEG00000016401	histone H1-like [Source:NCBI gene;Acc:109994852]	0	0	17.3444	-0.837287	0.0524574	0.470732
ENSLBEG00000006010	si:dkey-87o1.2 [Source:ZFIN;Acc:ZDB-GENE-110411-217]	si:dkey-87o1.2	si:dkey-87o1.2	491.485	0.300091	0.0525018	0.470747
ENSLBEG00000000816	splicing factor 3a subunit 3 [Source:NCBI gene;Acc:109987056]	sf3a3	sf3a3	403.991	0.28376	0.0525156	0.470747
ENSLBEG00000012998	RNA binding motif protein 28 [Source:NCBI gene;Acc:109998147]	rbm28	rbm28	318.296	0.346454	0.0526149	0.471275
ENSLBEG00000009646	0	0	0	27.7414	-0.636667	0.0526311	0.471275
ENSLBEG00000014634	CD164 molecule [Source:NCBI gene;Acc:109983250]	cd164	cd164	2612.24	-0.253575	0.0526732	0.471301
ENSLBEG00000001050	family with sequence similarity 181 member B [Source:NCBI gene;Acc:109984774]	FAM181B	FAM181B	9.66949	0.729469	0.0526906	0.471301
ENSLBEG00000010575	heat shock protein 90 alpha family class B member 1 [Source:NCBI gene;Acc:109978791]	hsp90ab1	hsp90ab1	36651.3	0.531813	0.0527583	0.471653
ENSLBEG00000015217	KIAA1324 ortholog [Source:NCBI gene;Acc:109994821]	si:ch211-163l21.8	si:ch211-163l21.8	341.201	0.3057	0.0529053	0.472198
ENSLBEG00000017418	0	0	0	66.5901	0.579659	0.0529147	0.472198
ENSLBEG00000025134	disabled homolog 2-interacting protein-like [Source:NCBI gene;Acc:109984448]	0	0	161.221	-0.405502	0.0529275	0.472198
ENSLBEG00000026234	asporin [Source:NCBI gene;Acc:109981796]	aspn	aspn	23.6501	1.871	0.0529483	0.472198
ENSLBEG00000010298	lysosomal alpha-glucosidase-like [Source:NCBI gene;Acc:109991842]	si:ch73-12o23.1	si:ch73-12o23.1	1587.8	-0.294976	0.052961	0.472198
ENSLBEG00000020285	phosphoribosylglycinamide formyltransferase, phosphoribosylglycinamide synthetase, phosphoribosylaminoimidazole synthetase [Source:NCBI gene;Acc:110000731]	gart	gart	74.1135	0.451002	0.0530396	0.472646
ENSLBEG00000020890	peptide chain release factor 1-like, mitochondrial [Source:NCBI gene;Acc:109998340]	mtrf1l	mtrf1l	14.0885	-0.642478	0.0531038	0.472723
ENSLBEG00000019954	protein S100-A1-like [Source:NCBI gene;Acc:110002604]	s100a1	s100a1	181.141	-1.88065	0.0531051	0.472723
ENSLBEG00000025184	VPS37C, ESCRT-I subunit [Source:NCBI gene;Acc:110001358]	vps37c	vps37c	71.0164	-0.410626	0.0531516	0.472843
ENSLBEG00000017080	SH2 domain-containing protein 7-like [Source:NCBI gene;Acc:109982287]	0	0	31.2071	-0.929787	0.0532181	0.472843
ENSLBEG00000010745	fyn related Src family tyrosine kinase [Source:NCBI gene;Acc:109986117]	frk	frk	1218.59	-0.412063	0.0532957	0.472843
ENSLBEG00000023076	deoxynucleoside triphosphate triphosphohydrolase SAMHD1-like [Source:NCBI gene;Acc:110005387]	0	0	258.212	-0.710844	0.0533104	0.472843
ENSLBEG00000020517	keratin, type I cytoskeletal 18-like [Source:NCBI gene;Acc:109993807]	krt18b	krt18b	612.262	0.493722	0.0533348	0.472843
ENSLBEG00000017551	nicotinamide riboside kinase 2-like [Source:NCBI gene;Acc:110005297]	nmrk2	nmrk2	25.2505	-0.793547	0.0533961	0.472843
ENSLBEG00000008084	interferon regulatory factor 2-binding protein 2-A-like [Source:NCBI gene;Acc:109980232]	irf2bp2a	irf2bp2a	167.324	0.517435	0.0534547	0.472843
ENSLBEG00000014681	RAB11 family interacting protein 3 [Source:NCBI gene;Acc:109986815]	rab11fip3	rab11fip3	568.541	0.397677	0.0534566	0.472843
ENSLBEG00000026779	RAB13, member RAS oncogene family [Source:NCBI gene;Acc:109986496]	rab13	rab13	1210.32	-0.453206	0.0534685	0.472843
ENSLBEG00000006616	allograft inflammatory factor 1-like [Source:NCBI gene;Acc:109986628]	AIF1	AIF1	1694.86	-0.455142	0.0534742	0.472843
ENSLBEG00000021216	catenin beta interacting protein 1 [Source:NCBI gene;Acc:109982879]	ctnnbip1	ctnnbip1	698.505	-0.298589	0.0534941	0.472843
ENSLBEG00000004638	frizzled class receptor 4 [Source:NCBI gene;Acc:109995788]	fzd4	fzd4	49.6699	0.554776	0.0534996	0.472843
ENSLBEG00000026297	translocase of inner mitochondrial membrane 10 [Source:NCBI gene;Acc:109989809]	timm10	timm10	290.685	0.505075	0.0535245	0.472843
ENSLBEG00000009337	signal peptidase complex subunit 3 [Source:NCBI gene;Acc:110002425]	spcs3	spcs3	252.626	0.386464	0.053534	0.472843
ENSLBEG00000025253	0	0	0	101.135	0.333946	0.0535444	0.472843
ENSLBEG00000024225	TWIST neighbor [Source:NCBI gene;Acc:109982464]	twistnb	twistnb	100.871	0.427136	0.0536179	0.473102
ENSLBEG00000028232	cystatin F [Source:NCBI gene;Acc:109976841]	CST7	CST7	138.747	-0.29465	0.0536375	0.473102
ENSLBEG00000018637	bromodomain adjacent to zinc finger domain, 1A [Source:ZFIN;Acc:ZDB-GENE-030131-6105]	baz1a	baz1a	334.877	0.207129	0.0536919	0.473102
ENSLBEG00000010904	retinol dehydrogenase 12-like [Source:NCBI gene;Acc:109983739]	rdh12l	rdh12l	557	0.309687	0.0537062	0.473102
ENSLBEG00000011911	0	0	0	43.4684	-0.628459	0.05374	0.473102
ENSLBEG00000001190	C5a anaphylatoxin chemotactic receptor 1-like [Source:NCBI gene;Acc:110000372]	0	0	35.8163	0.86484	0.0537715	0.473102
ENSLBEG00000007704	primary amine oxidase, liver isozyme-like [Source:NCBI gene;Acc:109991837]	aoc2	aoc2	169.334	0.47832	0.0538046	0.473102
ENSLBEG00000009267	transmembrane channel like 6 [Source:HGNC Symbol;Acc:HGNC:18021]	TMC6	TMC6	1143.18	-0.296095	0.0538085	0.473102
ENSLBEG00000016928	AF4/FMR2 family member 1-like [Source:NCBI gene;Acc:109996586]	0	0	138.177	0.2535	0.0538409	0.473102
ENSLBEG00000026210	thrombospondin type-1 domain-containing protein 4-like [Source:NCBI gene;Acc:109986507]	0	0	510.316	0.351707	0.0538824	0.473102
ENSLBEG00000028276	MSL complex subunit 3 [Source:NCBI gene;Acc:109995107]	MSL3	MSL3	115.942	0.312481	0.0539166	0.473102
ENSLBEG00000006744	mitochondrial ribosomal protein L51 [Source:NCBI gene;Acc:110000484]	mrpl51	mrpl51	235.574	0.269856	0.0539294	0.473102
ENSLBEG00000013558	protein FAM110A-like [Source:NCBI gene;Acc:109985872]	fam110a	fam110a	277.338	-0.479038	0.053943	0.473102
ENSLBEG00000022933	AP-1 complex subunit sigma-3-like [Source:NCBI gene;Acc:109984009]	ap1s3b	ap1s3b	955.455	-0.307889	0.053986	0.47323
ENSLBEG00000018356	matrix metallopeptidase 13 [Source:NCBI gene;Acc:109992108]	mmp13b	mmp13b	27	3.02134	0.0540475	0.473296
ENSLBEG00000024206	BSD domain containing 1 [Source:NCBI gene;Acc:109999684]	bsdc1	bsdc1	1887.4	-0.153059	0.0540615	0.473296
ENSLBEG00000004166	lipoic acid synthetase [Source:NCBI gene;Acc:109989935]	lias	lias	35.4451	0.607496	0.0541012	0.473296
ENSLBEG00000029003	prothymosin alpha-B-like [Source:NCBI gene;Acc:109979850]	0	0	1893.37	-0.235333	0.054116	0.473296
ENSLBEG00000028561	methyltransferase like 23 [Source:NCBI gene;Acc:109999163]	mettl23	mettl23	49.7245	0.422028	0.0541356	0.473296
ENSLBEG00000022186	0	0	0	4166.7	0.740938	0.0541664	0.473317
ENSLBEG00000028595	transforming growth factor-beta receptor-associated protein 1-like [Source:NCBI gene;Acc:109987569]	si:ch211-266g18.9	si:ch211-266g18.9	5.3222	1.28998	0.0541859	NA
ENSLBEG00000021454	protein turtle homolog A-like [Source:NCBI gene;Acc:109983337]	igsf9b	igsf9b	50.3242	0.764266	0.0542803	0.474063
ENSLBEG00000006531	Sec61 translocon gamma subunit [Source:ZFIN;Acc:ZDB-GENE-040718-203]	sec61g	sec61g	3322.61	0.275885	0.054314	0.474063
ENSLBEG00000010979	chromosome unknown C8orf59 homolog [Source:NCBI gene;Acc:109983783]	si:ch211-282b22.1	si:ch211-282b22.1	103.838	0.522241	0.0543878	0.474063
ENSLBEG00000017503	synaptotagmin 4 [Source:NCBI gene;Acc:110001820]	syt4	syt4	43.4769	0.394504	0.0543908	0.474063
ENSLBEG00000026440	inter-alpha-trypsin inhibitor heavy chain H3-like [Source:NCBI gene;Acc:109983398]	0	0	535.4	0.420846	0.0544432	0.474063
ENSLBEG00000015944	endoplasmic reticulum aminopeptidase 1-like [Source:NCBI gene;Acc:109997695]	erap1b	erap1b	21.8205	0.590074	0.0544523	0.474063
ENSLBEG00000005082	type I inositol 3,4-bisphosphate 4-phosphatase-like [Source:NCBI gene;Acc:109984194]	inpp4ab	inpp4ab	644.264	0.175902	0.0544551	0.474063
ENSLBEG00000022888	negative elongation factor complex member C/D [Source:NCBI gene;Acc:109990309]	nelfcd	nelfcd	271.911	-0.177642	0.0544795	0.474063
ENSLBEG00000006104	autophagy related 2A [Source:NCBI gene;Acc:109985443]	si:ch73-45o6.2	si:ch73-45o6.2	599.237	-0.28834	0.0545283	0.47424
ENSLBEG00000002002	0	0	0	46.1198	-1.54185	0.054584	0.474476
ENSLBEG00000022992	nucleolar protein 7-like [Source:NCBI gene;Acc:109976641]	0	0	93.954	0.370028	0.0546213	0.474499
ENSLBEG00000011227	WD repeat domain 74 [Source:NCBI gene;Acc:109979119]	wdr74	wdr74	28.4548	0.66311	0.0546436	0.474499
ENSLBEG00000004762	branched-chain-amino-acid aminotransferase, cytosolic-like [Source:NCBI gene;Acc:109998005]	bcat2	bcat2	99.2621	0.494955	0.0547346	0.475041
ENSLBEG00000011369	cholinephosphotransferase 1 [Source:NCBI gene;Acc:109993602]	chpt1	chpt1	1394.11	-0.337271	0.054822	0.475519
ENSLBEG00000001300	kin of IRRE-like protein 1 [Source:NCBI gene;Acc:109992831]	kirrel1a	kirrel1a	75.1089	0.502678	0.0549008	0.475519
ENSLBEG00000026998	clarin 2 [Source:NCBI gene;Acc:109994031]	clrn2	clrn2	5.00057	1.09598	0.0549357	NA
ENSLBEG00000012653	BCL2 associated athanogene 6 [Source:NCBI gene;Acc:109993653]	bag6l	bag6l	69.6045	0.36894	0.0549653	0.475519
[truncated: 16,070 more rows]

## Sheet: Protein vs Empty
GenID		Gene Name		baseMean	log2FoldChange	lfcSE	stat	pvalue	padj
ENSLBEG00000022257	protein NLRC3-like [Source:NCBI gene;Acc:109975308]	nlrc3	NLRC3	365.137	6.84451	1.68241	4.06828	4.73617e-05	0.0262058
ENSLBEG00000019807	uncharacterized LOC109986305 [Source:NCBI gene;Acc:109986305]	0	0	1532.6	-5.05654	0.749882	-6.74311	1.55033e-11	2.74501e-07
ENSLBEG00000002199	monocyte chemotactic protein 1B-like [Source:NCBI gene;Acc:109984093]	CCL2	CCL2	250.235	-2.0854	0.356403	-5.85124	4.87915e-09	4.31951e-05
ENSLBEG00000020296	0	0	0	256.636	-5.44156	0.998217	-5.45128	5.00095e-08	0.000295156
ENSLBEG00000019895	laminin subunit beta 3 [Source:NCBI gene;Acc:109994895]	lamb3	LAMB3	589.401	1.06592	0.200487	5.31667	1.05684e-07	0.000467811
ENSLBEG00000011959	von Willebrand factor-like [Source:NCBI gene;Acc:109991285]	vwf	VWF	280.12	0.905568	0.181075	5.00105	5.70184e-07	0.00168261
ENSLBEG00000001960	tyrosine-protein kinase Blk-like [Source:NCBI gene;Acc:109987710]	blk	BLK	312.876	-0.985922	0.196999	-5.00472	5.59439e-07	0.00168261
ENSLBEG00000010596	B-cell lymphoma/leukemia 11A-like [Source:NCBI gene;Acc:109990648]	bcl11ab	BCL11A	470.616	-0.789322	0.159148	-4.95966	7.06159e-07	0.00178618
ENSLBEG00000002215	regakine-1-like [Source:NCBI gene;Acc:109984080]	CXCL8	CXCL8	699.472	-1.27108	0.260373	-4.88177	1.05136e-06	0.00232691
ENSLBEG00000023410	immunoglobulin superfamily member 3-like [Source:NCBI gene;Acc:110003314]	IGSF3	IGSF3	1347.33	-0.57678	0.125646	-4.59053	4.42127e-06	0.0078283
ENSLBEG00000016092	0	0	0	335.4	-0.621156	0.135149	-4.59606	4.30545e-06	0.0078283
ENSLBEG00000000192	0	0	0	43.5025	-1.36719	0.299384	-4.56668	4.95509e-06	0.0079759
ENSLBEG00000015505	hemopexin-like [Source:NCBI gene;Acc:109996574]	hpx	HPX	32.3167	3.50224	0.783846	4.46802	7.89464e-06	0.009847
ENSLBEG00000010012	bactericidal permeability-increasing protein-like [Source:NCBI gene;Acc:109983171]	BPI	BPI	757.558	2.56431	0.576708	4.44647	8.72948e-06	0.009847
ENSLBEG00000018472	mucin-2-like [Source:NCBI gene;Acc:110003345]	MUC2	MUC2	50563.3	0.994718	0.223766	4.44535	8.77471e-06	0.009847
ENSLBEG00000015591	guanine nucleotide exchange factor VAV3-like [Source:NCBI gene;Acc:109981016]	vav3b	VAV3	162.044	-1.09773	0.244787	-4.48443	7.31089e-06	0.009847
ENSLBEG00000000147	uncharacterized LOC109992842 [Source:NCBI gene;Acc:109992842]	0	0	41.4145	-1.5873	0.35731	-4.44235	8.89823e-06	0.009847
ENSLBEG00000011540	probable carboxypeptidase X1 [Source:NCBI gene;Acc:110001132]	CPXM1	CPXM1	104.164	2.0326	0.465519	4.3663	1.26366e-05	0.0111872
ENSLBEG00000012674	phosphatidylinositol transfer protein cytoplasmic 1 [Source:NCBI gene;Acc:109989053]	PITPNC1	PITPNC1	94.445	-0.932796	0.213141	-4.37643	1.20639e-05	0.0111872
ENSLBEG00000016719	RNA polymerase II subunit B [Source:HGNC Symbol;Acc:HGNC:9188]	POLR2B	POLR2B	23.9703	-2.3852	0.544449	-4.38094	1.18168e-05	0.0111872
ENSLBEG00000023095	0	0	0	8.19301	-3.96402	0.905803	-4.37625	1.20738e-05	0.0111872
ENSLBEG00000027085	plasmalemma vesicle associated protein b [Source:ZFIN;Acc:ZDB-GENE-060616-96]	plvapb	PLVAP	91.963	0.811251	0.187212	4.33333	1.4687e-05	0.0123832
ENSLBEG00000012159	zinc finger protein Eos-like [Source:NCBI gene;Acc:109984943]	ikzf4	IKZF4	205.217	0.804526	0.186261	4.31934	1.56499e-05	0.0124684
ENSLBEG00000012984	0	0	0	33.9041	-2.08642	0.48389	-4.31176	1.61963e-05	0.0124684
ENSLBEG00000002062	solute carrier family 12 member 8 [Source:NCBI gene;Acc:109985346]	slc12a8	SLC12A8	291.524	0.667777	0.15741	4.24228	2.21264e-05	0.0163237
ENSLBEG00000016873	inhibitor of DNA binding 1, HLH protein [Source:NCBI gene;Acc:109983917]	id1	ID1	254.19	0.717807	0.171378	4.18845	2.80869e-05	0.0198922
ENSLBEG00000021746	hydroperoxide isomerase ALOXE3-like [Source:NCBI gene;Acc:109994925]	ALOXE3	ALOXE3	55.1946	2.34801	0.564846	4.1569	3.2259e-05	0.0203992
ENSLBEG00000027164	coagulation factor VIII-like [Source:NCBI gene;Acc:109992607]	F8	F8	20.8541	1.6427	0.394434	4.16469	3.11769e-05	0.0203992
ENSLBEG00000014561	transducin like enhancer of split 4 [Source:NCBI gene;Acc:109997670]	TLE4	TLE4	190.246	-1.01769	0.244728	-4.15846	3.20399e-05	0.0203992
ENSLBEG00000003303	E3 ubiquitin-protein ligase TRIM21-like [Source:NCBI gene;Acc:109988861]	TRIM21	TRIM21	74.3149	-0.903394	0.221382	-4.0807	4.49009e-05	0.0262058
ENSLBEG00000016227	lymphocyte function-associated antigen 3-like [Source:NCBI gene;Acc:110004687]	CD58	CD58	57.6438	-1.15623	0.283323	-4.08095	4.48524e-05	0.0262058
ENSLBEG00000005076	ladderlectin-like [Source:NCBI gene;Acc:110002359]	RTLL	RTLL	353.303	-4.44711	1.0924	-4.07097	4.68179e-05	0.0262058
ENSLBEG00000002928	protein C8orf4 homolog [Source:NCBI gene;Acc:110002292]	tcima	TCIM	487.329	0.949449	0.236089	4.02158	5.78096e-05	0.0294785
ENSLBEG00000010664	PDZ domain containing 2 [Source:NCBI gene;Acc:109982007]	pdzd2	PDZD2	90.7316	0.931793	0.231475	4.02546	5.68642e-05	0.0294785
ENSLBEG00000025473	dedicator of cytokinesis 10 [Source:NCBI gene;Acc:109988041]	dock10	DOCK10	1056.19	-0.623701	0.155161	-4.0197	5.82711e-05	0.0294785
ENSLBEG00000016976	interferon regulatory factor 4-like [Source:NCBI gene;Acc:109987022]	irf4a	IRF4	688.16	-0.746977	0.186791	-3.999	6.36107e-05	0.0312859
ENSLBEG00000028211	desmoglein-3-like [Source:NCBI gene;Acc:109993407]	DSG3	DSG3	39.2691	2.21017	0.561643	3.93519	8.31299e-05	0.0350452
ENSLBEG00000015615	matrix metallopeptidase 9 [Source:NCBI gene;Acc:109994784]	mmp9	MMP9	901.242	1.7824	0.452489	3.9391	8.17871e-05	0.0350452
ENSLBEG00000000532	0	0	0	982.45	0.888377	0.224755	3.95264	7.7294e-05	0.0350452
ENSLBEG00000020929	cytotoxic and regulatory T cell molecule [Source:NCBI gene;Acc:109993206]	CRTAM	CRTAM	388.393	-0.833041	0.210799	-3.95182	7.75576e-05	0.0350452
ENSLBEG00000004876	SAM and SH3 domain-containing protein 1-like [Source:NCBI gene;Acc:109977468]	sash1b	SASH1B	184.968	-0.840906	0.21316	-3.94496	7.98138e-05	0.0350452
ENSLBEG00000002005	cold shock domain-containing protein C2-like [Source:NCBI gene;Acc:109992285]	csdc2a	CSDC2	38.4067	-1.09344	0.277339	-3.94263	8.05946e-05	0.0350452
ENSLBEG00000003384	calcitonin related polypeptide beta [Source:NCBI gene;Acc:109986006]	CALCB	CALCB	55.4966	1.70935	0.435772	3.92258	8.7605e-05	0.035253
ENSLBEG00000008037	docking protein 2-like [Source:NCBI gene;Acc:109995880]	dok2	DOK2	815.674	-0.880357	0.224156	-3.92743	8.58574e-05	0.035253
ENSLBEG00000009804	neuropeptide B [Source:NCBI gene;Acc:109999356]	npb	NPB	114.619	1.75962	0.451175	3.90008	9.616e-05	0.0373912
ENSLBEG00000026943	solute carrier organic anion transporter family member 2A1-like [Source:NCBI gene;Acc:109983227]	slco2a1	SLCO2A1	303.026	0.831968	0.213455	3.89762	9.7142e-05	0.0373912
ENSLBEG00000021105	nuclear factor 1 X-type-like [Source:NCBI gene;Acc:109994379]	NFIX	NFIX	1451.25	-0.69568	0.180024	-3.86438	0.000111372	0.0419563
ENSLBEG00000010055	0	0	0	50.9568	1.78797	0.463546	3.85715	0.000114716	0.0422835
ENSLBEG00000016270	nuclear factor 7, ovary-like [Source:NCBI gene;Acc:110004690]	EH28_04993	EH28_04993	83.3878	-1.21382	0.315091	-3.85229	0.000117016	0.0422835
ENSLBEG00000018760	0	SELE	SELE	37.0324	2.20782	0.587192	3.75997	0.000169936	0.0442483
ENSLBEG00000007042	epithelial membrane protein 2-like [Source:NCBI gene;Acc:109977624]	EMP2	EMP2	93.6419	1.54259	0.409995	3.76246	0.000168248	0.0442483
ENSLBEG00000009391	uncharacterized LOC109978090 [Source:NCBI gene;Acc:109978090]	0	0	20.2715	1.42896	0.378177	3.77854	0.000157748	0.0442483
ENSLBEG00000019489	Tachykinin-3 precursor	TAC3	TAC3	71.2424	1.35141	0.357941	3.7755	0.000159684	0.0442483
ENSLBEG00000021119	ciliary neurotrophic factor receptor [Source:ZFIN;Acc:ZDB-GENE-030616-82]	cntfr	CNTFR	26.1294	1.19452	0.314203	3.80175	0.000143675	0.0442483
ENSLBEG00000014937	filamin A interacting protein 1 like [Source:NCBI gene;Acc:109990182]	FILIP1	FILIP1	238.725	1.03167	0.271662	3.79763	0.000146086	0.0442483
ENSLBEG00000020517	keratin, type I cytoskeletal 18-like [Source:NCBI gene;Acc:109993807]	krt18b	KRT18	612.262	1.00527	0.265625	3.78453	0.000153997	0.0442483
ENSLBEG00000012526	phospholipid phosphatase 3-like [Source:NCBI gene;Acc:109995408]	PLPP3	PLPP3	151.981	0.909904	0.241321	3.77051	0.000162913	0.0442483
ENSLBEG00000020202	EGF like domain multiple 7 [Source:NCBI gene;Acc:109996661]	egfl7	EGFL7	74.5207	0.893566	0.236637	3.77611	0.000159297	0.0442483
ENSLBEG00000015058	calcium uniporter protein, mitochondrial-like [Source:NCBI gene;Acc:109980052]	MCUB	MCUB	320.908	0.553415	0.146643	3.7739	0.000160712	0.0442483
ENSLBEG00000001697	cytoplasmic polyadenylation element-binding protein 4-like [Source:NCBI gene;Acc:109996813]	CPEB4	CPEB4	2183.69	-0.541096	0.142746	-3.79062	0.00015027	0.0442483
ENSLBEG00000017956	inositol polyphosphate-4-phosphatase type II B [Source:ZFIN;Acc:ZDB-GENE-090312-97]	inpp4b	INPP4B	292.394	-0.55537	0.146037	-3.80295	0.000142985	0.0442483
ENSLBEG00000003946	actin filament associated protein 1 like 2 [Source:NCBI gene;Acc:109996870]	afap1l2	AFAP1L2	742.424	-0.63964	0.169465	-3.77445	0.000160358	0.0442483
ENSLBEG00000009089	sodium/potassium/calcium exchanger 3-like [Source:NCBI gene;Acc:109987848]	SLC24A3	SLC24A3	72.067	-0.666552	0.177182	-3.76197	0.000168583	0.0442483
ENSLBEG00000025367	tripartite motif-containing protein 66-like [Source:NCBI gene;Acc:110001963]	trim66	TRIM66	158.676	-0.692288	0.182111	-3.80146	0.000143845	0.0442483
ENSLBEG00000002433	nuclear receptor subfamily 4 group A member 3 [Source:NCBI gene;Acc:109997416]	nr4a3	NR4A3	204.476	-0.817096	0.216523	-3.77372	0.000160834	0.0442483
ENSLBEG00000015197	0	0	0	489.636	-1.06479	0.282908	-3.76372	0.000167403	0.0442483
ENSLBEG00000015695	probable E3 SUMO-protein ligase RNF212 [Source:NCBI gene;Acc:110000063]	RNF212	RNF212	27.0242	-1.26865	0.333233	-3.8071	0.000140608	0.0442483
ENSLBEG00000015351	activation induced cytidine deaminase [Source:NCBI gene;Acc:109993694]	aicda	AICDA	10.1693	-2.37408	0.625089	-3.79798	0.000145877	0.0442483
ENSLBEG00000023568	LIM/homeobox protein LMX-1.2 [Source:NCBI gene;Acc:109983379]	lmx1bb	LMX1B	81.2083	1.30886	0.349092	3.74933	0.000177307	0.0454985
ENSLBEG00000020430	keratin, type II cytoskeletal 8-like [Source:NCBI gene;Acc:109993815]	krt8	KRT8	320.719	1.89349	0.507985	3.72745	0.000193426	0.0462811
ENSLBEG00000012027	keratin, type I cytoskeletal 18-like [Source:NCBI gene;Acc:109981518]	krt18a.1	KRT18	3133.09	0.931361	0.249676	3.73028	0.000191265	0.0462811
ENSLBEG00000026724	solute carrier family 26 member 5 [Source:NCBI gene;Acc:109993966]	slc26a5	SLC26A5	114.31	0.561482	0.150601	3.72828	0.00019279	0.0462811
ENSLBEG00000005053	early growth response 3 [Source:NCBI gene;Acc:110002329]	egr3	EGR3	187.424	-1.65786	0.443709	-3.73636	0.000186701	0.0462811
ENSLBEG00000004080	0	0	0	35.28	-1.82411	0.489119	-3.72938	0.000191954	0.0462811
ENSLBEG00000012455	zinc finger protein 512B [Source:NCBI gene;Acc:109980920]	znf512b	ZNF512B	872.821	-0.431821	0.116685	-3.70074	0.000214971	0.0507503
ENSLBEG00000018210	fatty acid-binding protein, heart-like [Source:NCBI gene;Acc:109997762]	fabp11a	PMP2	1693.76	0.755908	0.20451	3.69619	0.000218863	0.0509894
ENSLBEG00000015163	nidogen 2 [Source:NCBI gene;Acc:109996570]	nid2a	NID2	49.4272	1.6759	0.455184	3.68181	0.000231585	0.0525698
ENSLBEG00000020085	family with sequence similarity 102 member B [Source:NCBI gene;Acc:109997160]	FAM102B	FAM102B	373.591	-0.469468	0.127498	-3.68215	0.000231274	0.0525698
ENSLBEG00000025338	0	0	0	13.1612	-2.03328	0.554012	-3.6701	0.000242451	0.0543398
ENSLBEG00000017433	G protein-coupled receptor 1 [Source:NCBI gene;Acc:109984319]	gpr1	GPR1	25.9772	1.16669	0.320426	3.64106	0.000271523	0.0593529
ENSLBEG00000010136	discoidin domain-containing receptor 2-like [Source:NCBI gene;Acc:109999952]	ddr2l	DDR2L	131.286	0.798939	0.219362	3.6421	0.000270425	0.0593529
ENSLBEG00000025874	0	0	0	220.884	1.04372	0.287535	3.62989	0.000283545	0.0604874
ENSLBEG00000028192	early growth response protein 2b-like [Source:NCBI gene;Acc:109988720]	EGR2	EGR2	80.4171	-1.92279	0.529622	-3.6305	0.000282869	0.0604874
ENSLBEG00000018314	zinc finger and BTB domain containing 10 [Source:NCBI gene;Acc:109997760]	zbtb10	ZBTB10	1131.35	-0.440663	0.121689	-3.62123	0.000293205	0.0616614
ENSLBEG00000012175	HDGF like 3 [Source:NCBI gene;Acc:110002889]	HDGFL3	HDGFL3	228.056	-0.525646	0.145377	-3.61574	0.000299496	0.0616614
ENSLBEG00000016216	0	0	0	15.5226	-2.13363	0.589955	-3.61659	0.000298506	0.0616614
ENSLBEG00000021603	leukemia inhibitory factor receptor-like [Source:NCBI gene;Acc:109988512]	LIFR	LIFR	184.314	1.12926	0.313356	3.60376	0.000313641	0.063106
ENSLBEG00000004568	myeloid associated differentiation marker [Source:NCBI gene;Acc:109997477]	myadm	MYADM	226.749	0.985632	0.273349	3.60576	0.000311242	0.063106
ENSLBEG00000027849	serine/threonine-protein kinase D3-like [Source:NCBI gene;Acc:109988783]	zgc:175248	ZGC:175248	192.688	-0.688578	0.191366	-3.59823	0.000320385	0.0637387
ENSLBEG00000005150	indoleamine 2,3-dioxygenase 2-like [Source:NCBI gene;Acc:110002288]	ido1	IDO2	27.1345	1.70854	0.475711	3.59156	0.000328706	0.0646674
ENSLBEG00000009896	uncharacterized LOC109994154 [Source:NCBI gene;Acc:109994154]	0	0	227.286	-0.469043	0.130758	-3.58711	0.000334367	0.0650583
ENSLBEG00000000384	C-X-C motif chemokine 10-like [Source:NCBI gene;Acc:110002205]	CXCL10	CXCL10	11.4655	-2.71503	0.759887	-3.57294	0.000352991	0.0679354
ENSLBEG00000009366	axin-1-like [Source:NCBI gene;Acc:109991173]	AXIN1	AXIN1	974.373	-0.344011	0.0965258	-3.56393	0.000365343	0.0688167
ENSLBEG00000028834	0	0	0	87.9452	-1.02784	0.288234	-3.56599	0.00036249	0.0688167
ENSLBEG00000024688	gap junction Cx32.2 protein-like [Source:NCBI gene;Acc:109986420]	cx28.9	CX28.9	12.8167	2.14201	0.60263	3.55444	0.000378781	0.0705967
ENSLBEG00000009021	plakophilin 1a [Source:ZFIN;Acc:ZDB-GENE-110411-77]	pkp1a	PKP1	98.382	0.946446	0.267382	3.53968	0.000400612	0.0723799
ENSLBEG00000025426	alpha-1,6-mannosylglycoprotein 6-beta-N-acetylglucosaminyltransferase A-like [Source:NCBI gene;Acc:109997305]	mgat5	MGAT5	1788.04	-0.448906	0.126701	-3.54304	0.00039554	0.0723799
ENSLBEG00000023144	deltex E3 ubiquitin ligase 1 [Source:NCBI gene;Acc:109983367]	DTX1	DTX1	197.6	-0.932963	0.263455	-3.54126	0.000398214	0.0723799
ENSLBEG00000026635	gremlin 1b [Source:ZFIN;Acc:ZDB-GENE-090218-21]	grem1b	GREM1	155.521	1.3026	0.369601	3.52435	0.000424529	0.0751672
ENSLBEG00000002834	SATB homeobox 1 [Source:NCBI gene;Acc:109988833]	satb1b	SATB1B	143.102	-0.945175	0.267983	-3.52699	0.000420312	0.0751672
ENSLBEG00000014524	cytochrome b-c1 complex subunit 6, mitochondrial-like [Source:NCBI gene;Acc:110005861]	UQCRH	UQCRH	51.8424	4.05171	1.15221	3.51647	0.000437328	0.0766667
ENSLBEG00000016537	0	TNFRSF12A	TNFRSF12A	21.4763	1.32506	0.377871	3.50665	0.000453793	0.0772582
ENSLBEG00000024402	natriuretic peptide receptor 1 [Source:NCBI gene;Acc:109997242]	npr1a	NPR1	53.7048	0.910993	0.259467	3.51101	0.000446403	0.0772582
ENSLBEG00000016783	0	0	0	277.193	-0.655039	0.186745	-3.50767	0.000452043	0.0772582
ENSLBEG00000010544	solute carrier family 35 member B2 [Source:NCBI gene;Acc:109978660]	slc35b2	SLC35B2	55.8002	0.718556	0.205246	3.50095	0.000463594	0.0781753
ENSLBEG00000002341	elongation factor 1 homolog [Source:NCBI gene;Acc:109993451]	ELOF1	ELOF1	383.136	0.47808	0.136688	3.49759	0.000469488	0.0784223
ENSLBEG00000005710	rearranged L-myc fusion [Source:NCBI gene;Acc:109990554]	rlf	RLF	379.065	-0.451091	0.129587	-3.48098	0.000499583	0.0826692
ENSLBEG00000015861	cysteinyl leukotriene receptor 1 [Source:NCBI gene;Acc:109981086]	cysltr1	CYSLTR1	85.53	0.846402	0.244006	3.46877	0.000522841	0.0857168
ENSLBEG00000027881	prostaglandin G/H synthase 1-like [Source:NCBI gene;Acc:109998488]	PTGS1	PTGS1	150.639	0.790721	0.22961	3.44376	0.000573678	0.0906924
ENSLBEG00000005361	SH2 domain-containing adapter protein E-like [Source:NCBI gene;Acc:109990038]	she	SHE	135.703	0.755079	0.218854	3.45014	0.000560287	0.0906924
ENSLBEG00000007327	arrestin domain-containing protein 3-like [Source:NCBI gene;Acc:110002080]	ARRDC3	ARRDC3	259.887	-0.487613	0.141438	-3.44753	0.000565739	0.0906924
ENSLBEG00000022743	protein NLRC3-like [Source:NCBI gene;Acc:109989723]	NLRC3	NLRC3	106.036	-5.22869	1.51779	-3.44494	0.000571181	0.0906924
ENSLBEG00000002356	scavenger receptor cysteine-rich type 1 protein M130-like [Source:NCBI gene;Acc:109987725]	CD163	CD163	1011.52	0.922432	0.26844	3.43627	0.000589782	0.0924131
ENSLBEG00000007567	EGF containing fibulin extracellular matrix protein 2 [Source:NCBI gene;Acc:109985468]	efemp2a	EFEMP2	94.9153	1.09188	0.318844	3.42449	0.000615959	0.0938553
ENSLBEG00000027764	StAR related lipid transfer domain containing 10 [Source:NCBI gene;Acc:109989871]	stard10	STARD10	494.558	0.629565	0.184201	3.41782	0.00063125	0.0938553
ENSLBEG00000023839	cyclin dependent kinase 6 [Source:NCBI gene;Acc:109982384]	cdk6	CDK6	861.23	-0.391328	0.114747	-3.41036	0.00064878	0.0938553
ENSLBEG00000016217	FYVE and coiled-coil domain-containing protein 1-like [Source:NCBI gene;Acc:109985027]	fyco1b	FYCO1	228.516	-0.486608	0.142659	-3.41099	0.000647275	0.0938553
ENSLBEG00000005307	zinc finger protein 236 [Source:NCBI gene;Acc:109984324]	znf236	ZNF236	82.7554	-0.624864	0.182242	-3.42876	0.000606339	0.0938553
ENSLBEG00000018982	F-box/WD repeat-containing protein 7-like [Source:NCBI gene;Acc:110001845]	FBXW7	FBXW7	80.3315	-0.626353	0.183103	-3.42077	0.000624435	0.0938553
ENSLBEG00000004738	protein kinase C beta type [Source:NCBI gene;Acc:109988297]	prkcba	PRKCBA	228.685	-1.00782	0.295138	-3.41473	0.000638443	0.0938553
ENSLBEG00000016018	nuclear receptor subfamily 4 group A member 1-like [Source:NCBI gene;Acc:109986406]	nr4a1	NR4A1	712.773	-1.22826	0.359486	-3.41672	0.000633813	0.0938553
ENSLBEG00000010501	nuclear receptor subfamily 1 group D member 1-like [Source:NCBI gene;Acc:109984954]	nr1d4a	NR1D4A	755.296	-1.33209	0.391009	-3.4068	0.000657294	0.0938553
ENSLBEG00000021865	0	0	0	48.9725	-1.96361	0.576327	-3.40711	0.000656551	0.0938553
ENSLBEG00000028248	kelch domain-containing protein 1-like [Source:NCBI gene;Acc:109981855]	KLHDC1	KLHDC1	17.2706	-2.14172	0.628481	-3.40778	0.000654942	0.0938553
ENSLBEG00000007075	C-type natriuretic peptide 1 [Source:NCBI gene;Acc:110000480]	nppc	NPPC	76.5413	1.11788	0.328481	3.40318	0.000666053	0.094134
ENSLBEG00000026335	histone-lysine N-methyltransferase 2A-like [Source:NCBI gene;Acc:109988011]	kmt2a	KMT2A	201.501	-0.665328	0.195591	-3.40162	0.000669879	0.094134
ENSLBEG00000006877	solute carrier family 15 member 2-like [Source:NCBI gene;Acc:109996918]	slc15a2	SLC15A2	160.229	1.61035	0.474858	3.39122	0.000695817	0.0947703
ENSLBEG00000016858	mannose receptor C-type 1 [Source:NCBI gene;Acc:109994249]	mrc1a	MRC1	89.6947	1.53542	0.452642	3.39213	0.000693525	0.0947703
ENSLBEG00000026217	sorcin [Source:NCBI gene;Acc:110000878]	SRI	SRI	1790.8	-0.543526	0.160105	-3.3948	0.000686787	0.0947703
ENSLBEG00000019831	calpain-1 catalytic subunit-like [Source:NCBI gene;Acc:109992138]	CAPN14	CAPN14	4220.81	-1.04942	0.30903	-3.39584	0.000684185	0.0947703
ENSLBEG00000026521	putative methyltransferase DDB_G0268948 [Source:NCBI gene;Acc:109992236]	ddb_g0268948	DDB_G0268948	25.5363	1.10566	0.328332	3.36751	0.000758514	0.0996022
ENSLBEG00000011557	solute carrier family 12 member 4 [Source:NCBI gene;Acc:109982687]	slc12a4	SLC12A4	189.572	0.559496	0.165966	3.37116	0.000748532	0.0996022
ENSLBEG00000016310	ring finger protein 126 [Source:NCBI gene;Acc:109982720]	RNF126	RNF126	328.319	-0.301703	0.0895139	-3.37046	0.000750426	0.0996022
ENSLBEG00000015730	folliculin-interacting protein 1-like [Source:NCBI gene;Acc:109987288]	fnip1	FNIP1	96.8327	-0.787804	0.233971	-3.36709	0.000759648	0.0996022
ENSLBEG00000011684	C-C motif chemokine 4-like [Source:NCBI gene;Acc:109998140]	CCL4L1	CCL4L1	1552.97	-1.01746	0.301692	-3.37252	0.000744836	0.0996022
ENSLBEG00000019877	calcium/calmodulin-dependent protein kinase type 1-like [Source:NCBI gene;Acc:109980621]	camk1a	CAMK1	35.3348	-1.19728	0.35579	-3.36514	0.000765046	0.0996022
ENSLBEG00000004051	transmembrane gamma-carboxyglutamic acid protein 1-like [Source:NCBI gene;Acc:109987770]	prrg1	PRRG1	18.9144	1.14971	0.341968	3.36203	0.000773703	0.0999941
ENSLBEG00000004848	dynamin-1-like protein [Source:NCBI gene;Acc:110002037]	dnm1l	DNM1L	811.698	-0.33102	0.0995922	-3.32376	0.000888136	0.113952
ENSLBEG00000013674	FRAS1-related extracellular matrix protein 1-like [Source:NCBI gene;Acc:109991328]	frem1a	FREM1	23.6616	1.25701	0.378778	3.31859	0.000904731	0.114267
ENSLBEG00000018411	tsukushi, small leucine rich proteoglycan [Source:NCBI gene;Acc:109992092]	tsku	TSKU	835.188	0.667952	0.20124	3.31918	0.000902837	0.114267
ENSLBEG00000014093	0	0	0	15.7963	-1.13621	0.342746	-3.31501	0.000916406	0.114267
ENSLBEG00000026056	von Willebrand factor A domain-containing protein 7-like [Source:NCBI gene;Acc:109989800]	vwa11	VWA7	1096.01	-3.05317	0.920548	-3.31669	0.000910913	0.114267
ENSLBEG00000004840	ETS-related transcription factor Elf-1-like [Source:NCBI gene;Acc:109995846]	ELF1	ELF1	1076.82	-0.353204	0.106708	-3.30999	0.000932979	0.1152
ENSLBEG00000003587	neuralized E3 ubiquitin protein ligase 3 [Source:NCBI gene;Acc:110002198]	NEURL3	NEURL3	948.951	-1.01884	0.307916	-3.30882	0.000936904	0.1152
ENSLBEG00000025168	ubiquitin-protein ligase E3A-like [Source:NCBI gene;Acc:109982581]	UBE3A	UBE3A	352.364	-0.44874	0.136098	-3.29718	0.000976606	0.119254
ENSLBEG00000016587	misshapen-like kinase 1 [Source:ZFIN;Acc:ZDB-GENE-060526-45]	mink1	MINK1	18.836	-1.12629	0.341895	-3.29426	0.000986809	0.119674
ENSLBEG00000018468	0	0	0	34.4492	1.44746	0.440707	3.28441	0.00102196	0.121287
ENSLBEG00000003251	tubulin alpha chain [Source:NCBI gene;Acc:109985350]	tuba8l3	TUBA4A	498.186	0.500245	0.152725	3.27546	0.00105491	0.121287
ENSLBEG00000013807	homeodomain-interacting protein kinase 1-like [Source:NCBI gene;Acc:109984239]	hipk1	HIPK1	679.393	-0.291901	0.0890302	-3.27868	0.00104295	0.121287
ENSLBEG00000014675	SR-related CTD associated factor 4 [Source:NCBI gene;Acc:109988389]	scaf4a	SCAF4	574.104	-0.293211	0.0893443	-3.28181	0.00103144	0.121287
ENSLBEG00000001008	0	0	0	81.5655	-0.867617	0.264133	-3.28478	0.00102062	0.121287
ENSLBEG00000028885	0	0	0	17.3172	-2.77332	0.8464	-3.2766	0.00105063	0.121287
ENSLBEG00000013920	0	CD59	CD59	15.4334	-3.31004	1.00901	-3.28047	0.00103636	0.121287
ENSLBEG00000002523	trypsin-1-like [Source:NCBI gene;Acc:110002290]	PRSS1	PRSS1	63.238	-3.6291	1.10778	-3.27602	0.00105281	0.121287
ENSLBEG00000020637	0	HMCN1	HMCN1	175.64	1.08297	0.331259	3.26927	0.00107827	0.123173
ENSLBEG00000025413	glucocorticoid modulatory element-binding protein 1-like [Source:NCBI gene;Acc:110000864]	GMEB1	GMEB1	33.2617	-0.86646	0.265184	-3.26739	0.00108544	0.123197
ENSLBEG00000004023	Rho guanine nucleotide exchange factor 1 [Source:NCBI gene;Acc:109996315]	arhgef1b	ARHGEF1	633.51	-0.25819	0.0791395	-3.26246	0.00110448	0.124509
ENSLBEG00000028835	uncharacterized LOC109992837 [Source:NCBI gene;Acc:109992837]	0	0	40.1895	-1.40313	0.430305	-3.26078	0.00111106	0.124509
ENSLBEG00000028950	0	0	0	29.5854	1.5552	0.477467	3.25718	0.00112524	0.124522
ENSLBEG00000000917	sterol 26-hydroxylase, mitochondrial-like [Source:NCBI gene;Acc:109983497]	cyp27a7	CYP27A1	94.1241	0.704578	0.216292	3.25754	0.00112384	0.124522
ENSLBEG00000021149	phosphatidylinositol-4,5-bisphosphate 3-kinase catalytic subunit delta [Source:NCBI gene;Acc:109982857]	pik3cd	PIK3CD	723.45	-0.519798	0.159885	-3.25108	0.00114969	0.126437
ENSLBEG00000000333	0	0	0	8.74822	-1.59725	0.492284	-3.24458	0.00117625	0.12856
ENSLBEG00000004302	sesquipedalian-1-like [Source:NCBI gene;Acc:109992938]	pheta1	PHETA1	48.7504	-1.25452	0.387006	-3.2416	0.00118861	0.129114
ENSLBEG00000026232	tumor necrosis factor receptor superfamily member 6B-like [Source:NCBI gene;Acc:109995681]	TNFRSF6B	TNFRSF6B	44.3788	1.18646	0.367128	3.23174	0.00123038	0.132368
ENSLBEG00000026669	ictacalcin-like [Source:NCBI gene;Acc:109988688]	icn	S100A4	938.878	1.01506	0.314161	3.23101	0.00123353	0.132368
ENSLBEG00000004536	kidney mitochondrial carrier protein 1-like [Source:NCBI gene;Acc:110002341]	SLC25A30	SLC25A30	1128.81	-0.35908	0.111425	-3.22261	0.00127029	0.135493
ENSLBEG00000005259	interleukin-12 receptor subunit beta-2-like [Source:NCBI gene;Acc:109998595]	il12rb2	IL12RB2	268.71	-0.618516	0.192225	-3.21766	0.00129239	0.136413
ENSLBEG00000014573	0	0	0	18.3531	-1.32451	0.411911	-3.21553	0.00130203	0.136413
ENSLBEG00000004839	suppressor of cytokine signaling 1-like [Source:NCBI gene;Acc:109988235]	socs1b	SOCS5	162.525	-1.49429	0.464558	-3.21658	0.0012973	0.136413
ENSLBEG00000025857	0	0	0	304.353	0.900628	0.280686	3.20867	0.00133351	0.138889
ENSLBEG00000012633	fructose-1,6-bisphosphatase 1-like [Source:NCBI gene;Acc:109997010]	FBP1	FBP1	508.451	1.06304	0.3315	3.20674	0.00134248	0.139006
ENSLBEG00000005323	serine/threonine-protein kinase tousled-like 2 [Source:NCBI gene;Acc:109983073]	tlk2	TLK2	144.974	0.957471	0.299112	3.20104	0.0013693	0.140959
ENSLBEG00000014300	proenkephalin [Source:NCBI gene;Acc:109996554]	penka	PENK	578.403	0.800648	0.250938	3.19062	0.00141969	0.14528
ENSLBEG00000022392	G-protein coupled receptor family C group 5 member C-like [Source:NCBI gene;Acc:109994553]	GPRC5C	GPRC5C	21.6379	-1.03428	0.324329	-3.18899	0.00142769	0.14528
ENSLBEG00000005070	phosphatidylethanolamine binding protein 4 [Source:NCBI gene;Acc:110002393]	PEBP4	PEBP4	92.704	1.20035	0.376714	3.18636	0.00144075	0.145771
ENSLBEG00000009999	CCR4-NOT transcription complex subunit 4 [Source:NCBI gene;Acc:110003115]	cnot4a	CNOT4	642.902	-0.244517	0.0769745	-3.1766	0.00149014	0.149064
ENSLBEG00000015809	long-chain-fatty-acid--CoA ligase 6-like [Source:NCBI gene;Acc:109987282]	ACSL6	ACSL6	159.672	-0.650833	0.20479	-3.17805	0.00148268	0.149064
ENSLBEG00000013649	synaptotagmin-like protein 1 [Source:NCBI gene;Acc:109979228]	sytl1	SYTL1	50.8746	0.755242	0.239739	3.15027	0.00163121	0.156811
ENSLBEG00000009303	major facilitator superfamily domain-containing protein 4A-like [Source:NCBI gene;Acc:109983152]	mfsd4aa	MFSD4A	150.305	0.654279	0.207043	3.1601	0.00157713	0.156811
ENSLBEG00000002953	ras homolog family member U [Source:NCBI gene;Acc:109995058]	rhoua	RHOU	74.9545	0.621656	0.1973	3.15081	0.00162816	0.156811
ENSLBEG00000015217	KIAA1324 ortholog [Source:NCBI gene;Acc:109994821]	kiaa1324	KIAA1324	341.201	0.51758	0.164315	3.14993	0.0016331	0.156811
ENSLBEG00000019268	metastasis associated 1 family member 2 [Source:NCBI gene;Acc:109995531]	MTA2	MTA2	1394.63	-0.336325	0.106789	-3.14943	0.00163587	0.156811
ENSLBEG00000015340	uncharacterized LOC109991330 [Source:NCBI gene;Acc:109991330]	0	0	435.265	-0.672956	0.213665	-3.14958	0.00163505	0.156811
ENSLBEG00000001958	SLAM family member 9-like [Source:NCBI gene;Acc:109975459]	SLAMF9	SLAMF9	72.5469	-1.05123	0.333046	-3.1564	0.00159729	0.156811
ENSLBEG00000003948	CD79a molecule [Source:NCBI gene;Acc:109996316]	cd79a	CD79A	280.224	-1.06334	0.337678	-3.14898	0.00163843	0.156811
ENSLBEG00000024213	NK2 homeobox 3 [Source:NCBI gene;Acc:109996727]	nkx2.3	NKX2.3	67.4148	0.625505	0.19903	3.14276	0.00167364	0.157625
ENSLBEG00000005218	cytohesin-3-like [Source:NCBI gene;Acc:109998003]	cyth4a	CYTH4	635.106	-0.588533	0.187099	-3.14557	0.00165765	0.157625
ENSLBEG00000006841	mitogen-activated protein kinase kinase kinase kinase 5-like [Source:NCBI gene;Acc:109999897]	MAP4K1	MAP4K1	378.203	-0.649493	0.206648	-3.143	0.00167227	0.157625
ENSLBEG00000013152	coiled-coil domain containing 130 [Source:NCBI gene;Acc:109990891]	ccdc130	CCDC130	189.068	0.342832	0.109205	3.13935	0.00169325	0.158438
ENSLBEG00000017892	C-X-C motif chemokine receptor 5 [Source:NCBI gene;Acc:110003036]	cxcr5	CXCR5	53.2222	-1.2168	0.387743	-3.13815	0.00170017	0.158438
ENSLBEG00000005750	0	0	0	9.44586	3.21042	1.0252	3.1315	0.00173916	0.160383
ENSLBEG00000028355	0	0	0	76.9018	-1.09486	0.349607	-3.1317	0.00173799	0.160383
ENSLBEG00000020965	0	0	0	87.0462	-0.891416	0.28495	-3.12833	0.00175803	0.161283
ENSLBEG00000023359	proteasome subunit beta 7 [Source:NCBI gene;Acc:109995596]	psmb7	PSMB7	312.655	0.875805	0.280658	3.12055	0.00180517	0.164344
ENSLBEG00000021810	HIC ZBTB transcriptional repressor 1 [Source:NCBI gene;Acc:109999461]	hic1	HIC1	129.61	-1.05547	0.338317	-3.11976	0.00180996	0.164344
ENSLBEG00000023327	0	0	0	17.2686	1.19415	0.38299	3.11797	0.00182102	0.164505
ENSLBEG00000027702	uncharacterized LOC109980707 [Source:NCBI gene;Acc:109980707]	zbtb4	ZBTB4	120.842	-0.698914	0.224543	-3.11261	0.00185443	0.165637
ENSLBEG00000000217	0	0	0	12.9929	-1.6593	0.533286	-3.11146	0.00186162	0.165637
ENSLBEG00000013330	0	0	0	9.78836	-3.12325	1.00334	-3.11285	0.00185289	0.165637
ENSLBEG00000011909	clumping factor A-like [Source:NCBI gene;Acc:109996490]	spp1	SPP1	141.158	2.83666	0.915701	3.0978	0.00194962	0.16723
ENSLBEG00000014592	eph receptor A2 a [Source:ZFIN;Acc:ZDB-GENE-990415-63]	epha2a	EPHA2A	36.7537	0.85235	0.274684	3.10302	0.00191557	0.16723
ENSLBEG00000028765	liprin-beta-2-like [Source:NCBI gene;Acc:109992772]	PPFIBP2	PPFIBP2	185.738	0.595896	0.191828	3.10641	0.00189371	0.16723
ENSLBEG00000025591	glucokinase regulator [Source:NCBI gene;Acc:109997301]	GCKR	GCKR	295.342	-0.412662	0.133172	-3.09872	0.00194361	0.16723
ENSLBEG00000027945	NACHT, LRR and PYD domains-containing protein 6-like [Source:NCBI gene;Acc:109989863]	nlrc3l	NLRC3L	213.217	-0.684354	0.220975	-3.09697	0.00195508	0.16723
ENSLBEG00000005916	zinc fingers and homeoboxes 1 [Source:NCBI gene;Acc:109984059]	ZHX1	ZHX1	39.2353	-0.819208	0.264261	-3.1	0.00193521	0.16723
ENSLBEG00000003066	nuclear factor of activated T-cells, cytoplasmic 2-like [Source:NCBI gene;Acc:109980853]	NFATC2	NFATC2	292.691	-0.960167	0.309932	-3.09799	0.00194839	0.16723
ENSLBEG00000002511	zgc:113337 [Source:ZFIN;Acc:ZDB-GENE-050306-20]	zgc:113337	PVR	47.0341	-1.37772	0.443978	-3.10313	0.00191487	0.16723
ENSLBEG00000014712	uncharacterized LOC109977208 [Source:NCBI gene;Acc:109977208]	0	0	183.155	-1.27488	0.413013	-3.08679	0.00202332	0.172235
ENSLBEG00000012743	nucleus accumbens-associated protein 1-like [Source:NCBI gene;Acc:109991748]	nacc1b	NACC1	300.703	-0.522118	0.169245	-3.08498	0.00203566	0.172457
ENSLBEG00000020429	vascular endothelial growth factor C [Source:NCBI gene;Acc:109986904]	vegfc	VEGFC	9.06151	1.50225	0.4875	3.08155	0.00205926	0.172802
ENSLBEG00000012908	CD3e molecule [Source:NCBI gene;Acc:109991935]	CD3E	CD3E	1158.84	-0.762163	0.247327	-3.0816	0.00205889	0.172802
ENSLBEG00000003773	zgc:113279 [Source:ZFIN;Acc:ZDB-GENE-050522-529]	zgc:113279	ZGC:113279	7.61271	2.40917	0.787532	3.05914	0.0022197	0.173903
ENSLBEG00000021098	RAS and EF-hand domain containing [Source:NCBI gene;Acc:110003128]	RASEF	RASEF	20.8271	1.37767	0.450328	3.05926	0.00221884	0.173903
ENSLBEG00000014865	sphingomyelin synthase 2 [Source:NCBI gene;Acc:109980526]	sgms2a	SGMS2	23.4302	1.01041	0.328449	3.07631	0.00209581	0.173903
ENSLBEG00000008111	peroxiredoxin-6-like [Source:NCBI gene;Acc:109982570]	prdx6	PRDX6	1918.63	0.874763	0.285853	3.06019	0.00221199	0.173903
ENSLBEG00000002563	gap junction Cx32.2 protein-like [Source:NCBI gene;Acc:109994048]	cx32.2	CX32.2	157.806	0.823628	0.269159	3.06001	0.00221333	0.173903
ENSLBEG00000018423	probable Xaa-Pro aminopeptidase 3 [Source:NCBI gene;Acc:109975239]	Xpnpep3	XPNPEP3	58.5105	0.653885	0.213519	3.06242	0.00219554	0.173903
ENSLBEG00000027762	transmembrane protein 134 [Source:NCBI gene;Acc:109999135]	tmem134	TMEM134	174.511	0.451897	0.147146	3.07107	0.00213295	0.173903
ENSLBEG00000004715	cysteine-rich hydrophobic domain-containing protein 2 [Source:NCBI gene;Acc:109989967]	chic2	CHIC2	690.574	-0.391837	0.12795	-3.06241	0.00219559	0.173903
ENSLBEG00000010737	chromosome unknown C1orf123 homolog [Source:NCBI gene;Acc:109997026]	si:ch211-284b7.3	CZIB	347.725	-0.415534	0.135428	-3.0683	0.00215282	0.173903
ENSLBEG00000025487	trio Rho guanine nucleotide exchange factor [Source:NCBI gene;Acc:109990888]	trioa	TRIO	184.76	-0.51402	0.167257	-3.07324	0.00211747	0.173903
ENSLBEG00000011058	kinesin family member 21B [Source:NCBI gene;Acc:109984219]	kif21b	KIF21B	138.932	-0.666344	0.21694	-3.07155	0.00212948	0.173903
ENSLBEG00000022486	probable nuclear hormone receptor HR38 [Source:NCBI gene;Acc:109990324]	NR4A1	NR4A1	483.042	-0.958421	0.312153	-3.07036	0.00213804	0.173903
ENSLBEG00000003524	paired box 5 [Source:NCBI gene;Acc:109989954]	pax5	PAX5	47.7423	-1.13918	0.371522	-3.06626	0.00216758	0.173903
ENSLBEG00000025022	protein Daple-like [Source:NCBI gene;Acc:110000295]	CCDC88C	0	14.511	-1.50856	0.492618	-3.06234	0.00219614	0.173903
ENSLBEG00000005052	ladderlectin-like [Source:NCBI gene;Acc:110002361]	RTLL	RTLL	319.671	-3.34037	1.09034	-3.0636	0.00218693	0.173903
ENSLBEG00000014825	leucine rich repeat containing 18a [Source:ZFIN;Acc:ZDB-GENE-090313-323]	lrrc18a	LRRC18	7.35863	1.89657	0.62131	3.05253	0.0022692	0.174689
ENSLBEG00000012007	potassium two pore domain channel subfamily K member 1 [Source:NCBI gene;Acc:109983206]	kcnk1b	KCNK1	1266.1	-0.317204	0.103835	-3.0549	0.00225139	0.174689
ENSLBEG00000005408	NLR family CARD domain containing 5 [Source:NCBI gene;Acc:109988894]	nlrc5	NLRC5	205.403	-0.499403	0.163578	-3.053	0.00226563	0.174689
ENSLBEG00000027099	zinc finger protein DPF3-like [Source:NCBI gene;Acc:109981333]	DPF3	DPF3	141.443	-0.638425	0.208946	-3.05546	0.00224718	0.174689
ENSLBEG00000023475	phytanoyl-CoA dioxygenase domain containing 1 [Source:NCBI gene;Acc:109984474]	phyhd1	PHYHD1	25.0097	1.37721	0.4517	3.04895	0.00229642	0.17526
ENSLBEG00000011272	ETS translocation variant 4-like [Source:NCBI gene;Acc:109992400]	etv4	ETV4	73.6678	0.885985	0.29055	3.04934	0.00229344	0.17526
ENSLBEG00000022417	reticulon 1 [Source:NCBI gene;Acc:109992558]	rtn1b	RTN1	310.749	0.713354	0.234553	3.04133	0.00235535	0.175966
ENSLBEG00000013156	poly(U)-specific endoribonuclease-C-like [Source:NCBI gene;Acc:109977165]	endouc	ENDOUC	1252.88	0.552995	0.181722	3.04309	0.00234165	0.175966
ENSLBEG00000019778	uncharacterized LOC109991474 [Source:NCBI gene;Acc:109991474]	paics	PAICS	351.15	0.504808	0.165818	3.04435	0.00233184	0.175966
ENSLBEG00000000025	RAS guanyl releasing protein 1 [Source:NCBI gene;Acc:109981329]	RASGRP1	RASGRP1	435.566	-0.401325	0.131862	-3.04353	0.00233819	0.175966
ENSLBEG00000025319	natural resistance-associated macrophage protein 2-like [Source:NCBI gene;Acc:109996246]	SLC11A1	SLC11A1	111.599	-1.10255	0.362446	-3.04196	0.00235041	0.175966
ENSLBEG00000019287	0	0	0	92.4341	-0.812964	0.267534	-3.03873	0.00237574	0.176743
ENSLBEG00000026072	NIMA related kinase 8 [Source:NCBI gene;Acc:109996765]	nek8	NEK8	41.2809	0.684612	0.225617	3.0344	0.00241017	0.178554
ENSLBEG00000028135	arf-GAP with coiled-coil, ANK repeat and PH domain-containing protein 1-like [Source:NCBI gene;Acc:109980690]	acap1	ACAP1	893.196	-0.380241	0.125419	-3.03176	0.00243133	0.179371
ENSLBEG00000011697	regulator of cell cycle RGCC-like [Source:NCBI gene;Acc:109982632]	rgcc	RGCC	167.336	0.796586	0.263037	3.02842	0.00245833	0.179907
ENSLBEG00000003222	sprouty RTK signaling antagonist 2 [Source:ZFIN;Acc:ZDB-GENE-030131-7038]	spry2	SPRY2	158.921	-0.600464	0.198281	-3.02835	0.00245891	0.179907
ENSLBEG00000010904	retinol dehydrogenase 12-like [Source:NCBI gene;Acc:109983739]	rdh12l	RDH12L	557	0.504557	0.166803	3.02486	0.0024875	0.180507
ENSLBEG00000025751	B cell CLL/lymphoma 6 [Source:NCBI gene;Acc:109983071]	bcl6aa	BCL6A	210.668	-0.83455	0.27587	-3.02515	0.00248508	0.180507
ENSLBEG00000021633	fibrous sheath CABYR-binding protein-like [Source:NCBI gene;Acc:109985148]	fscb	FSCB	202.363	0.528719	0.175072	3.02002	0.00252761	0.182393
ENSLBEG00000025764	protein tyrosine phosphatase, non-receptor type 4 [Source:NCBI gene;Acc:109994489]	ptpn4a	PTPN4A	968.348	-0.463406	0.153484	-3.01924	0.0025341	0.182393
ENSLBEG00000020983	angiopoietin like 6 [Source:NCBI gene;Acc:109989250]	ANGPTL6	ANGPTL6	21.2196	1.40578	0.46612	3.01593	0.00256194	0.182411
ENSLBEG00000021005	dihydropyrimidine dehydrogenase [Source:NCBI gene;Acc:109981208]	dpydb	DPYD	140.132	1.27776	0.423643	3.01613	0.0025602	0.182411
ENSLBEG00000005153	integrin beta-3-like [Source:NCBI gene;Acc:109983117]	itgb3a	ITGB3	693.095	0.580076	0.192363	3.01554	0.00256525	0.182411
ENSLBEG00000005139	transcriptional repressor CTCF-like [Source:NCBI gene;Acc:109989598]	ctcf	CTCF	1696.51	-0.246449	0.0817689	-3.01397	0.0025785	0.182619
ENSLBEG00000017493	organic solute transporter subunit alpha-like [Source:NCBI gene;Acc:109998267]	slc51a	SLC51A	6.51179	2.2685	0.753431	3.01088	0.00260488	0.183171
ENSLBEG00000013896	cytoplasmic FMR1 interacting protein 2 [Source:NCBI gene;Acc:109981079]	cyfip2	CYFIP2	333.834	-0.654147	0.217365	-3.00944	0.00261732	0.183171
ENSLBEG00000020091	sterile alpha motif domain containing 5 [Source:HGNC Symbol;Acc:HGNC:21180]	SAMD5	SAMD5	9.91706	-1.19458	0.39684	-3.01023	0.00261047	0.183171
ENSLBEG00000018068	0	0	0	13.4701	2.14173	0.712595	3.00553	0.00265121	0.183214
ENSLBEG00000001093	sodium/hydrogen exchanger 3-like [Source:NCBI gene;Acc:109976705]	SLC9A3	SLC9A3	83.7262	1.0686	0.355565	3.00536	0.00265271	0.183214
ENSLBEG00000005080	lysine demethylase 3B [Source:NCBI gene;Acc:109993527]	kdm3b	KDM3B	1232.23	-0.240609	0.0800854	-3.0044	0.00266106	0.183214
ENSLBEG00000001726	LDL receptor related protein 10 [Source:NCBI gene;Acc:109988753]	lrp10	LRP10	2112.13	-0.399631	0.133032	-3.00402	0.00266441	0.183214
ENSLBEG00000017417	PH and SEC7 domain-containing protein 3-like [Source:NCBI gene;Acc:109996608]	PSD3	PSD3	1002.03	-0.464957	0.154809	-3.00342	0.00266966	0.183214
ENSLBEG00000015235	0	0	0	10.0017	-3.69306	1.23035	-3.00164	0.0026853	0.183575
ENSLBEG00000020632	general transcription factor IIE subunit 1-like [Source:NCBI gene;Acc:109987393]	gtf2e1	GTF2E1	8.59531	2.08874	0.69735	2.99525	0.00274219	0.185317
ENSLBEG00000008697	paired box protein Pax-2a-like [Source:NCBI gene;Acc:109992992]	pax2a	PAX2A	15.3664	-1.84691	0.616387	-2.99635	0.00273233	0.185317
ENSLBEG00000013001	0	0	0	6.52351	-3.6113	1.2048	-2.99743	0.00272264	0.185317
ENSLBEG00000016566	0	0	0	148.386	-0.570473	0.19083	-2.98943	0.00279498	0.188167
ENSLBEG00000021418	0	0	0	145.004	-2.2378	0.749201	-2.98691	0.0028181	0.189005
ENSLBEG00000018497	AF4/FMR2 family member 3 [Source:NCBI gene;Acc:109994860]	AFF3	AFF3	188.47	-0.661608	0.221674	-2.98459	0.00283954	0.189011
ENSLBEG00000023201	0	0	0	54.9853	-0.828506	0.277588	-2.98466	0.00283894	0.189011
ENSLBEG00000023248	thymocyte selection-associated high mobility group box protein TOX-like [Source:NCBI gene;Acc:109982871]	TOX2	TOX2	421.998	-0.498004	0.167071	-2.98079	0.00287504	0.190657
ENSLBEG00000003358	receptor-type tyrosine-protein phosphatase-like N [Source:NCBI gene;Acc:109985354]	ptprna	PTPRNA	12.4525	1.28101	0.430045	2.97877	0.00289405	0.191202
ENSLBEG00000015118	galactose mutarotase [Source:NCBI gene;Acc:109987230]	galm	GALM	402.129	0.44766	0.150345	2.97755	0.00290566	0.191255
ENSLBEG00000019217	0	0	0	36.4954	1.67565	0.56313	2.9756	0.00292413	0.191758
ENSLBEG00000011033	interleukin-3 receptor class 2 subunit beta-like [Source:NCBI gene;Acc:109996985]	Csf2rb2	ILRA3	71.1145	1.44337	0.485867	2.97071	0.0029711	0.193405
ENSLBEG00000006612	tetratricopeptide repeat protein 39A-like [Source:NCBI gene;Acc:109996384]	ttc39a	TTC39A	222.981	0.513366	0.172752	2.97169	0.00296169	0.193405
ENSLBEG00000002778	polycomb protein SCMH1-like [Source:NCBI gene;Acc:109999779]	SCMH1	SCMH1	131.064	-0.466033	0.156975	-2.96883	0.00298937	0.193882
ENSLBEG00000026440	inter-alpha-trypsin inhibitor heavy chain H3-like [Source:NCBI gene;Acc:109983398]	ITIH3	ITIH3	535.4	0.674059	0.227331	2.96511	0.00302578	0.194816
ENSLBEG00000023334	protein kinase C eta [Source:NCBI gene;Acc:109992578]	prkcha	PRKCHA	624.456	-0.44616	0.150461	-2.96529	0.00302397	0.194816
ENSLBEG00000026409	inter-alpha-trypsin inhibitor heavy chain 3 [Source:NCBI gene;Acc:109983399]	ITIH3	ITIH3	447.816	1.49205	0.503502	2.96335	0.00304314	0.195224
ENSLBEG00000008334	0	0	0	43.3519	3.07528	1.03818	2.9622	0.00305453	0.195247
ENSLBEG00000015161	tyrosine-protein phosphatase non-receptor type 1-like [Source:NCBI gene;Acc:109986582]	ptpn1	PTPN1	1351.18	-0.500809	0.169252	-2.95895	0.00308685	0.196604
ENSLBEG00000003024	caveolin 1 [Source:NCBI gene;Acc:109986543]	cav1	CAV1	2891.79	0.468225	0.158457	2.9549	0.00312775	0.197162
ENSLBEG00000020641	transmembrane protein 43 [Source:NCBI gene;Acc:109990296]	TMEM43	TMEM43	196.332	0.44163	0.14948	2.95443	0.00313245	0.197162
ENSLBEG00000013341	0	0	0	54.1418	-0.937367	0.317261	-2.95456	0.00313112	0.197162
ENSLBEG00000010514	ras-specific guanine nucleotide-releasing factor 2-like [Source:NCBI gene;Acc:110000545]	rasgrf2a	RASGRF2A	103.606	-1.12891	0.382206	-2.95367	0.00314016	0.197162
ENSLBEG00000000962	ubiquitin-conjugating enzyme E2 K-like [Source:NCBI gene;Acc:109990520]	ube2ka	UBE2K	517.878	-0.32721	0.111093	-2.94537	0.00322573	0.201819
ENSLBEG00000003904	0	0	0	567.905	-0.806902	0.274214	-2.9426	0.00325473	0.202916
ENSLBEG00000003567	regulator of G-protein signaling 5-like [Source:NCBI gene;Acc:109986568]	rgs16	RGS16	135.94	1.30326	0.44456	2.93158	0.00337246	0.204176
ENSLBEG00000005423	C-type mannose receptor 2-like [Source:NCBI gene;Acc:109983088]	mrc2	MRC2	129.313	0.778611	0.265586	2.93168	0.00337137	0.204176
ENSLBEG00000007979	angiopoietin-like 1a [Source:ZFIN;Acc:ZDB-GENE-040724-269]	angptl1a	ANGPTL1	79.4223	0.680898	0.232179	2.93264	0.00336089	0.204176
ENSLBEG00000012821	reelin [Source:NCBI gene;Acc:110002634]	RELN	RELN	101.635	0.622461	0.212076	2.93509	0.0033345	0.204176
ENSLBEG00000018372	zinc finger protein 827 [Source:NCBI gene;Acc:109980428]	znf827	ZNF827	889.94	-0.394155	0.134263	-2.93569	0.00332804	0.204176
ENSLBEG00000022662	E3 ubiquitin-protein ligase CHIP-like [Source:NCBI gene;Acc:109993846]	STUB1	STUB1	307.784	-0.424582	0.144777	-2.93267	0.00336061	0.204176
ENSLBEG00000010679	PHD finger protein 8 [Source:NCBI gene;Acc:109984213]	phf8	PHF8	499.305	-0.439549	0.149892	-2.93243	0.00336317	0.204176
ENSLBEG00000005465	uncharacterized LOC109990008 [Source:NCBI gene;Acc:109990008]	0	0	376.585	-0.454662	0.155032	-2.9327	0.00336034	0.204176
ENSLBEG00000009923	importin subunit alpha-7-like [Source:NCBI gene;Acc:109988988]	kpna6	KPNA6	87.6083	-0.703464	0.240008	-2.931	0.00337871	0.204176
ENSLBEG00000002347	stAR-related lipid transfer protein 13-like [Source:NCBI gene;Acc:109984744]	stard13b	STARD13	222.965	0.62434	0.213209	2.92831	0.00340814	0.204558
ENSLBEG00000002978	chordin like 2 [Source:NCBI gene;Acc:109983581]	chrdl2	CHRDL2	181.904	0.422108	0.14414	2.92846	0.00340648	0.204558
ENSLBEG00000012769	programmed cell death 1 ligand 1-like [Source:NCBI gene;Acc:109975834]	0	0	96.2617	-0.982287	0.335568	-2.92724	0.00341986	0.204568
ENSLBEG00000014450	cohesin subunit SA-2-like [Source:NCBI gene;Acc:109981054]	stag2b	STAG2	1357.18	-0.34862	0.119298	-2.92227	0.00347492	0.206466
ENSLBEG00000002859	E3 SUMO-protein ligase CBX4-like [Source:NCBI gene;Acc:109999250]	CBX4	CBX4	1783.13	-1.06038	0.362808	-2.92271	0.00346996	0.206466
ENSLBEG00000003641	ADAM metallopeptidase with thrombospondin type 1 motif 8 [Source:NCBI gene;Acc:109992310]	adamts15b	ADAMTS8	69.0324	1.25083	0.428415	2.91968	0.00350394	0.20664
ENSLBEG00000001300	kin of IRRE-like protein 1 [Source:NCBI gene;Acc:109992831]	kirrel1a	KIRREL1	75.1089	0.798171	0.273716	2.91605	0.00354492	0.20664
ENSLBEG00000026430	stabilin 1 [Source:NCBI gene;Acc:109981735]	stab1	STAB1	437.506	0.652872	0.223591	2.91995	0.00350093	0.20664
ENSLBEG00000011632	transcriptional activator GLI3-like [Source:NCBI gene;Acc:109983801]	gli3	GLI3	37.7096	0.579081	0.198567	2.9163	0.00354205	0.20664
ENSLBEG00000027457	small ubiquitin-like modifier 2 [Source:NCBI gene;Acc:109985884]	0	0	1034.08	-0.257838	0.088521	-2.91273	0.00358288	0.20664
ENSLBEG00000018403	cereblon [Source:NCBI gene;Acc:109993741]	crbn	CRBN	521.204	-0.483003	0.165616	-2.91641	0.00354085	0.20664
ENSLBEG00000014535	nucleolar protein 4 like [Source:NCBI gene;Acc:109986529]	nol4la	NOL4LA	14.1005	-1.26438	0.434075	-2.9128	0.00358201	0.20664
ENSLBEG00000015198	0	0	0	212.015	-2.24174	0.769401	-2.91361	0.00357273	0.20664
ENSLBEG00000008753	0	0	0	228.956	-2.35229	0.807466	-2.91317	0.00357775	0.20664
ENSLBEG00000006405	0	0	0	29.7341	-1.53715	0.528037	-2.91106	0.00360202	0.20707
ENSLBEG00000010046	0	0	0	19.4276	2.31953	0.797615	2.90808	0.00363655	0.207998
ENSLBEG00000017327	immunoglobulin superfamily member 10-like [Source:NCBI gene;Acc:109997749]	mxra5a	MXRA5	115.805	1.13853	0.391849	2.90554	0.00366622	0.207998
ENSLBEG00000000012	muscarinic acetylcholine receptor M1-like [Source:NCBI gene;Acc:109988683]	0	CHRM1	34.5363	1.07316	0.369591	2.90365	0.00368845	0.207998
ENSLBEG00000022902	secretogranin-2-like [Source:NCBI gene;Acc:109984085]	scg2b	SCG2	47.5829	0.7677	0.264393	2.90363	0.00368867	0.207998
ENSLBEG00000023912	putative E3 ubiquitin-protein ligase UNKL [Source:NCBI gene;Acc:109990376]	unkl	UNKL	189.308	-0.780426	0.268589	-2.90565	0.00366493	0.207998
ENSLBEG00000024346	heparan sulfate glucosamine 3-O-sulfotransferase 6-like [Source:NCBI gene;Acc:109990409]	HS3ST6	HS3ST6	75.3745	-1.67215	0.575486	-2.90563	0.00366516	0.207998
ENSLBEG00000021952	angiopoietin 1 [Source:NCBI gene;Acc:109994942]	angpt1	ANGPT1	265.238	0.511642	0.176303	2.90206	0.00370713	0.208063
ENSLBEG00000007874	0	0	0	16.8497	-2.51552	0.866959	-2.90154	0.00371331	0.208063
ENSLBEG00000018632	serotransferrin-like [Source:NCBI gene;Acc:109991434]	tfa	LTF	131.286	2.37225	0.819768	2.89381	0.00380603	0.20853
ENSLBEG00000027714	jun dimerization protein 2-like [Source:NCBI gene;Acc:110001456]	jdp2b	JDP2	26.1516	1.23791	0.42718	2.89787	0.00375703	0.20853
ENSLBEG00000016495	0	0	0	16.7202	1.07686	0.372442	2.89136	0.0038358	0.20853
ENSLBEG00000013824	cysteine rich angiogenic inducer 61 [Source:NCBI gene;Acc:109983833]	cyr61	CYR61	232.119	0.980091	0.338192	2.89803	0.00375515	0.20853
ENSLBEG00000021597	laminin subunit gamma-1-like [Source:NCBI gene;Acc:109992561]	si:dkey-21a6.5	LAMC1	80.0335	0.806429	0.278432	2.89632	0.00377568	0.20853
ENSLBEG00000018218	GRAM domain containing 2A [Source:NCBI gene;Acc:109986844]	gramd2aa	GRAMD2A	304.843	0.754954	0.261134	2.89106	0.00383943	0.20853
ENSLBEG00000005749	centrosomal protein 128 [Source:NCBI gene;Acc:109983648]	CEP128	CEP128	41.7711	0.595785	0.205836	2.89447	0.00379803	0.20853
ENSLBEG00000025961	cytoplasmic polyadenylation element-binding protein 3-like [Source:NCBI gene;Acc:109998436]	cpeb3	CPEB3	374.423	-0.570998	0.197047	-2.89779	0.00375808	0.20853
ENSLBEG00000018696	0	0	0	38.0328	-0.612281	0.211433	-2.89587	0.00378113	0.20853
ENSLBEG00000021610	3-oxo-5-beta-steroid 4-dehydrogenase-like [Source:NCBI gene;Acc:110004693]	AKR1D1	AKR1D1	176.951	-1.27916	0.44239	-2.89148	0.00383427	0.20853
ENSLBEG00000002058	0	0	0	36.9447	0.995361	0.344515	2.88917	0.00386263	0.209149
ENSLBEG00000014462	T-lymphoma invasion and metastasis-inducing protein 1-like [Source:NCBI gene;Acc:109988373]	tiam1a	TIAM1	593.723	-0.347786	0.120506	-2.88605	0.00390104	0.210585
ENSLBEG00000009240	keratin, type I cytoskeletal 13-like [Source:NCBI gene;Acc:109990660]	krt15	KRT17	477.213	2.41234	0.836208	2.88485	0.00391598	0.210749
ENSLBEG00000017198	metabotropic glutamate receptor 6-like [Source:NCBI gene;Acc:110002528]	GRM6	GRM6	87.6378	0.800754	0.277877	2.88168	0.00395558	0.210981
ENSLBEG00000023777	ski oncogene-like [Source:NCBI gene;Acc:109980660]	skib	SKIB	58.5898	0.760057	0.263873	2.88039	0.00397177	0.210981
ENSLBEG00000010710	pyruvate dehydrogenase (acetyl-transferring) kinase isozyme 2, mitochondrial-like [Source:NCBI gene;Acc:109995925]	pdk2a	PDK2A	742.115	0.634849	0.220236	2.88258	0.00394433	0.210981
ENSLBEG00000015298	uncharacterized LOC110005107 [Source:NCBI gene;Acc:110005107]	0	0	2951.75	-0.85651	0.297425	-2.87975	0.00397987	0.210981
ENSLBEG00000028634	transmembrane protein 60 [Source:NCBI gene;Acc:109987644]	TMEM60	TMEM60	16.9844	-0.934212	0.324213	-2.88148	0.00395813	0.210981
ENSLBEG00000002614	GRB2-related adapter protein-like [Source:NCBI gene;Acc:109995748]	grapa	GRAP	173.949	-0.327396	0.113739	-2.87848	0.00399597	0.211202
ENSLBEG00000024814	0	0	0	120.915	0.777072	0.270238	2.87551	0.0040338	0.212472
ENSLBEG00000010290	zinc finger protein Dzip1-like [Source:NCBI gene;Acc:109992387]	dzip1	DZIP1	57.1354	0.695947	0.242093	2.87471	0.004044	0.212472
ENSLBEG00000024526	matrix metalloproteinase-17-like [Source:NCBI gene;Acc:109988608]	mmp25b	MMP25	265.335	0.915298	0.318724	2.87175	0.00408201	0.213834
ENSLBEG00000001411	protein-glutamine gamma-glutamyltransferase K-like [Source:NCBI gene;Acc:109998537]	tgm1l1	TGM1	167.377	0.846611	0.295078	2.86911	0.00411626	0.214993
ENSLBEG00000004117	0	0	0	18.6747	-2.21536	0.772505	-2.86777	0.00413382	0.215275
ENSLBEG00000009152	limb development membrane protein 1 [Source:NCBI gene;Acc:109997561]	lmbr1	LMBR1	306.344	-0.335458	0.11711	-2.86446	0.00417718	0.216599
ENSLBEG00000000017	0	0	0	5.84305	-1.77044	0.618179	-2.86397	0.00418371	0.216599
ENSLBEG00000010131	Tctex1 domain containing 1 [Source:NCBI gene;Acc:109996433]	tctex1d1	TCTEX1D1	9.29123	2.35364	0.822812	2.86049	0.0042299	0.217825
ENSLBEG00000021189	cystatin-C-like [Source:NCBI gene;Acc:109981667]	si:busm1-57f23.1	CST3	6.3024	1.7905	0.625977	2.86033	0.004232	0.217825
ENSLBEG00000025888	0	0	0	145.362	0.920172	0.322054	2.8572	0.00427402	0.21928
ENSLBEG00000004534	adducin 3 [Source:NCBI gene;Acc:109981896]	add3b	ADD3	442.099	0.484313	0.169609	2.85546	0.00429743	0.21928
ENSLBEG00000011689	0	0	0	613.837	-0.768746	0.269208	-2.85558	0.00429586	0.21928
ENSLBEG00000013946	0	0	0	12.8401	-2.98626	1.04746	-2.85097	0.00435863	0.221764
ENSLBEG00000012547	tumor necrosis factor-like [Source:NCBI gene;Acc:109993620]	0	TNF	41.1216	-1.34274	0.471145	-2.84995	0.00437263	0.221839
ENSLBEG00000016054	clusterin-like [Source:NCBI gene;Acc:109988432]	clu	CLU	389.517	0.606323	0.212965	2.84706	0.00441256	0.222024
ENSLBEG00000007585	THUMP domain containing 2 [Source:NCBI gene;Acc:109987820]	THUMPD2	THUMPD2	184.099	-0.376793	0.132349	-2.84696	0.0044139	0.222024
ENSLBEG00000006958	purine nucleoside phosphorylase 6 [Source:ZFIN;Acc:ZDB-GENE-040426-1800]	pnp6	PNP6	530.63	-1.32562	0.465559	-2.84737	0.00440823	0.222024
ENSLBEG00000001190	C5a anaphylatoxin chemotactic receptor 1-like [Source:NCBI gene;Acc:110000372]	0	0	35.8163	1.33652	0.470211	2.84238	0.00447775	0.223306
ENSLBEG00000001531	cell death activator CIDE-3-like [Source:NCBI gene;Acc:109980868]	cidec	CIDEC	128.403	0.794561	0.279713	2.84063	0.00450245	0.223306
ENSLBEG00000007249	complement C4-like [Source:NCBI gene;Acc:109986674]	c4b	C4B	1966.16	0.655632	0.230621	2.8429	0.00447051	0.223306
ENSLBEG00000023310	CDK5 regulatory subunit associated protein 2 [Source:ZFIN;Acc:ZDB-GENE-030131-6392]	cdk5rap2	CDK5RAP2	106.243	-0.820852	0.288914	-2.84116	0.004495	0.223306
ENSLBEG00000026734	0	0	0	35.0136	-1.14284	0.402139	-2.8419	0.00448451	0.223306
ENSLBEG00000008838	0	0	0	133.853	-1.44301	0.508651	-2.83693	0.004555	0.225282
ENSLBEG00000004314	LDL receptor related protein 2 [Source:NCBI gene;Acc:109991788]	lrp2a	LRP2	11.3507	2.07742	0.735256	2.82544	0.0047216	0.225386
ENSLBEG00000020777	inhibin subunit beta A [Source:NCBI gene;Acc:109992497]	inhbaa	INHBA	121.401	2.01841	0.714394	2.82534	0.00472302	0.225386
ENSLBEG00000009205	NK6 homeobox 2 [Source:NCBI gene;Acc:109989525]	nkx6.2	NKX6.2	14.9595	1.81113	0.639237	2.83326	0.00460752	0.225386
ENSLBEG00000013035	0	0	0	59.7576	0.670211	0.236415	2.83489	0.00458414	0.225386
ENSLBEG00000018343	EH domain containing 2 [Source:NCBI gene;Acc:109995496]	ehd2b	EHD2	411.228	0.596893	0.211473	2.82255	0.00476427	0.225386
ENSLBEG00000015637	short transient receptor potential channel 6-like [Source:NCBI gene;Acc:109998216]	trpc6a	TRPC6	209.881	0.5216	0.185005	2.81938	0.00481169	0.225386
ENSLBEG00000017626	E3 ubiquitin-protein ligase RNF31-like [Source:NCBI gene;Acc:109994280]	0	0	474.114	-0.331337	0.116865	-2.83522	0.00457943	0.225386
ENSLBEG00000025539	remodeling and spacing factor 1 [Source:NCBI gene;Acc:109993951]	rsf1b.1	RSF1	623.139	-0.337735	0.119636	-2.82302	0.0047574	0.225386
ENSLBEG00000001039	Rap guanine nucleotide exchange factor 6 [Source:NCBI gene;Acc:109999214]	rapgef6	RAPGEF6	907.188	-0.382407	0.135602	-2.82006	0.00480142	0.225386
ENSLBEG00000023101	muscleblind-like protein 1 [Source:NCBI gene;Acc:109984038]	mbnl1	MBNL1	5639.83	-0.390576	0.138057	-2.82909	0.00466807	0.225386
ENSLBEG00000026088	E3 SUMO-protein ligase CBX4-like [Source:NCBI gene;Acc:109985836]	cbx4	CBX4	334.24	-0.410052	0.145371	-2.82073	0.00479145	0.225386
ENSLBEG00000014796	zinc finger and BTB domain containing 18 [Source:NCBI gene;Acc:110002963]	zbtb18	ZBTB18	307.942	-0.440546	0.155792	-2.82778	0.00468723	0.225386
ENSLBEG00000012778	ras association domain-containing protein 5-like [Source:NCBI gene;Acc:109984238]	si:dkey-85p17.3	RASSF5	519.7	-0.474335	0.167771	-2.82727	0.00469465	0.225386
ENSLBEG00000026205	COMM domain containing 6 [Source:NCBI gene;Acc:109997930]	commd6	COMMD6	149.704	-0.479921	0.169479	-2.83174	0.00462959	0.225386
ENSLBEG00000007694	protein argonaute-1 [Source:NCBI gene;Acc:109983699]	ago1	AGO1	66.1275	-0.504297	0.178219	-2.82965	0.00465993	0.225386
ENSLBEG00000021020	0	0	0	134.441	-0.593993	0.210274	-2.82485	0.00473025	0.225386
ENSLBEG00000024038	small nuclear ribonucleoprotein U11/U12 subunit 25 [Source:NCBI gene;Acc:109990377]	snrnp25	SNRNP25	68.6549	-0.60125	0.212246	-2.8328	0.00461421	0.225386
ENSLBEG00000000970	uncharacterized LOC109998510 [Source:NCBI gene;Acc:109998510]	zgc:113425	MS4A6A	64.4923	-0.744631	0.264059	-2.81994	0.0048032	0.225386
ENSLBEG00000012361	3'(2'), 5'-bisphosphate nucleotidase 1 [Source:NCBI gene;Acc:109979075]	bpnt1	BPNT1	596.252	-0.773335	0.273902	-2.8234	0.00475173	0.225386
ENSLBEG00000013691	0	0	0	15.9006	-1.26176	0.446106	-2.82838	0.00467847	0.225386
ENSLBEG00000003349	unconventional myosin-Ic-like [Source:NCBI gene;Acc:109981447]	myo1ca	MYO1CA	536.594	0.4478	0.158882	2.81844	0.00482581	0.225451
ENSLBEG00000012624	protein tyrosine phosphatase, receptor type B [Source:NCBI gene;Acc:109998714]	0	0	65.5343	0.848803	0.301308	2.81706	0.00484655	0.225824
ENSLBEG00000016293	follistatin like 3 [Source:NCBI gene;Acc:109982761]	fstl3	FSTL3	139.774	1.19613	0.424807	2.81571	0.00486692	0.226178
ENSLBEG00000006112	lipoprotein lipase-like [Source:NCBI gene;Acc:109987784]	0	LPL	116.704	1.369	0.486828	2.81208	0.00492222	0.227516
ENSLBEG00000005454	programmed cell death 1 ligand 1-like [Source:NCBI gene;Acc:110002820]	0	CD274	853.706	-0.49084	0.174596	-2.81129	0.00493426	0.227516
ENSLBEG00000004613	SH2 domain containing 3C [Source:NCBI gene;Acc:109987102]	sh2d3ca	SH2D3C	1092.54	-0.547869	0.194771	-2.81288	0.00490996	0.227516
ENSLBEG00000023694	attractin like 1 [Source:HGNC Symbol;Acc:HGNC:29063]	ATRNL1	ATRNL1	17.9288	0.979707	0.348701	2.80959	0.00496046	0.227539
ENSLBEG00000027741	coiled-coil domain containing 88A [Source:NCBI gene;Acc:109997360]	CCDC88A	CCDC88A	31.5429	-0.956979	0.34055	-2.8101	0.00495266	0.227539
ENSLBEG00000007312	RNA polymerase II elongation factor ELL2-like [Source:NCBI gene;Acc:109980855]	0	ELL2	28.517	0.793055	0.282816	2.80414	0.00504505	0.229252
ENSLBEG00000026928	casein kinase 1 gamma 2 [Source:NCBI gene;Acc:110000436]	csnk1g2b	CSNK1G2	1014.58	-0.343336	0.122452	-2.80385	0.0050496	0.229252
ENSLBEG00000003710	insulin like growth factor 2 mRNA binding protein 2 [Source:NCBI gene;Acc:109996833]	IGF2BP2	IGF2BP2	76.5769	-0.529126	0.188644	-2.80489	0.00503337	0.229252
ENSLBEG00000016770	zgc:162472 [Source:ZFIN;Acc:ZDB-GENE-050809-88]	zgc:162472	BDP1	14.6739	-1.28331	0.457461	-2.80528	0.00502731	0.229252
ENSLBEG00000012012	5'-nucleotidase domain-containing protein 2-like [Source:NCBI gene;Acc:109986276]	nt5dc2	NT5DC2	97.2943	0.785098	0.280331	2.80061	0.0051006	0.230975
ENSLBEG00000018785	TP53RK binding protein [Source:NCBI gene;Acc:109998437]	tprkb	TPRKB	202.916	-0.338676	0.121008	-2.79879	0.00512948	0.231639
ENSLBEG00000005241	CDC42 small effector 2 [Source:NCBI gene;Acc:109997071]	cdc42se2	CDC42SE2	189.617	-0.478997	0.17119	-2.79804	0.00514143	0.231639
ENSLBEG00000007230	ubiquitin carboxyl-terminal hydrolase 64E-like [Source:NCBI gene;Acc:109989414]	0	SEPT11	161.382	-0.775952	0.277528	-2.79594	0.00517487	0.231965
ENSLBEG00000000308	0	0	0	7.16849	-1.3497	0.482638	-2.79651	0.00516583	0.231965
ENSLBEG00000010389	three-finger toxin MALT0070C-like [Source:NCBI gene;Acc:109997570]	0	0	63.993	1.77468	0.635393	2.79305	0.00522143	0.233461
ENSLBEG00000024461	B-cell receptor CD22-like [Source:NCBI gene;Acc:109997891]	0		1050.48	-0.799854	0.286524	-2.79158	0.00524514	0.233931
ENSLBEG00000019784	complement component C1q receptor-like [Source:NCBI gene;Acc:109992141]	0	0	27.8611	1.19829	0.429546	2.78967	0.00527617	0.234135
ENSLBEG00000025293	la-related protein 4B-like [Source:NCBI gene;Acc:110004073]	0	0	31.5655	-0.771486	0.276486	-2.79032	0.00526552	0.234135
ENSLBEG00000022583	bryoporin-like [Source:NCBI gene;Acc:109997855]	0		89.4304	1.08221	0.388228	2.78755	0.00531075	0.234289
ENSLBEG00000005859	endothelin converting enzyme 1 [Source:NCBI gene;Acc:109991180]	ece1	ECE1	1356.63	0.400095	0.143556	2.78703	0.00531934	0.234289
ENSLBEG00000027829	inositol polyphosphate phosphatase like 1 [Source:NCBI gene;Acc:109989857]	inppl1a	INPPL1	211.369	-0.409061	0.14671	-2.78823	0.00529965	0.234289
ENSLBEG00000002625	0	0	0	194.328	-1.70472	0.611907	-2.78591	0.00533782	0.23452
ENSLBEG00000008359	caM kinase-like vesicle-associated protein [Source:NCBI gene;Acc:109984894]	camkvl	CAMKVL	12.11	1.78253	0.64122	2.7799	0.00543755	0.234941
ENSLBEG00000014725	0	0	0	43.7697	0.677508	0.243326	2.78436	0.00536335	0.234941
ENSLBEG00000007732	zinc finger protein 385A-like [Source:NCBI gene;Acc:109984256]	znf385a	ZNF385A	89.4895	0.540115	0.194255	2.78045	0.00542842	0.234941
ENSLBEG00000015051	deoxyhypusine synthase-like [Source:NCBI gene;Acc:110000633]	dhps	DHPS	209.644	0.4465	0.160627	2.77974	0.00544029	0.234941
ENSLBEG00000018293	ST8 alpha-N-acetyl-neuraminide alpha-2,8-sialyltransferase 1 [Source:NCBI gene;Acc:109998465]	st8sia1	ST8SIA1	2869.82	-0.494377	0.177696	-2.78216	0.00539991	0.234941
ENSLBEG00000002716	raftlin, lipid raft linker 1 [Source:NCBI gene;Acc:109988824]	0	RFTN1	280.976	-0.669537	0.240558	-2.78326	0.00538149	0.234941
ENSLBEG00000000151	uncharacterized LOC109992812 [Source:NCBI gene;Acc:109992812]	0	0	33.7277	-0.97088	0.349178	-2.78047	0.00542797	0.234941
ENSLBEG00000014539	sphingosine-1-phosphate receptor 4 [Source:ZFIN;Acc:ZDB-GENE-050506-8]	s1pr4	S1PR4	63.9335	1.56247	0.562328	2.77857	0.00545985	0.235212
ENSLBEG00000014998	metaxin 3 [Source:NCBI gene;Acc:109998743]	mtx3	MTX3	271.344	-0.336027	0.121137	-2.77394	0.00553826	0.238011
ENSLBEG00000006550	myocyte enhancer factor 2C [Source:NCBI gene;Acc:110001798]	mef2cb	MEF2C	105.343	-0.619966	0.223564	-2.77311	0.00555234	0.238038
ENSLBEG00000003694	serine/threonine-protein kinase 17A-like [Source:NCBI gene;Acc:109983099]	stk17al	STK17AL	2593.85	-0.364133	0.131464	-2.76984	0.00560845	0.239863
ENSLBEG00000021762	Kruppel like factor 5 [Source:NCBI gene;Acc:109987895]	pibf1	PIBF1	34.6306	1.68382	0.609184	2.76406	0.00570877	0.242397
ENSLBEG00000002334	SH3 domain-binding glutamic acid-rich-like protein 2 [Source:NCBI gene;Acc:109987670]	sh3bgrl2	SH3BGRL2	75.923	0.706709	0.255676	2.76408	0.00570843	0.242397
ENSLBEG00000004358	TBC1 domain family member 10B [Source:NCBI gene;Acc:109992921]	tbc1d10b	TBC1D10B	877.303	-0.323923	0.117149	-2.76505	0.00569136	0.242397
ENSLBEG00000013403	transmembrane protein 106B-like [Source:NCBI gene;Acc:109998736]	TMEM106B	TMEM106B	421.227	0.726562	0.2631	2.76154	0.00575291	0.242526
ENSLBEG00000016772	polo like kinase 2 [Source:NCBI gene;Acc:109994858]	plk2b	PLK2B	270.219	0.590219	0.213695	2.76197	0.00574533	0.242526
ENSLBEG00000012914	cytoplasmic dynein 1 intermediate chain 2-like [Source:NCBI gene;Acc:110001708]	dync1i2b	DYNC1I2	61.3763	0.541393	0.195965	2.76271	0.00573241	0.242526
ENSLBEG00000028077	0	0	0	662.9	-1.27436	0.461605	-2.76071	0.00576764	0.24257
ENSLBEG00000027071	mucolipin 2 [Source:NCBI gene;Acc:109995064]	mcoln2	MCOLN2	92.0906	0.685789	0.248881	2.75549	0.00586036	0.244149
ENSLBEG00000027942	copper chaperone for superoxide dismutase [Source:NCBI gene;Acc:109988706]	ccs	CCS	434.582	-0.35933	0.130391	-2.7558	0.00585487	0.244149
ENSLBEG00000028585	limb bud and heart development [Source:NCBI gene;Acc:109987596]	lbh	LBH	1240.8	-0.45062	0.16346	-2.75677	0.00583755	0.244149
ENSLBEG00000016056	0	0	0	344.313	-0.538187	0.195301	-2.75568	0.00585702	0.244149
ENSLBEG00000015465	EMILIN-2-like [Source:NCBI gene;Acc:109984968]	emilin2a	EMILIN2	261.057	0.596505	0.216568	2.75436	0.00588073	0.244423
ENSLBEG00000026718	protein kinase cAMP-activated catalytic subunit beta [Source:NCBI gene;Acc:109995056]	0	0	1067.6	-0.34212	0.12434	-2.75149	0.00593242	0.245419
ENSLBEG00000006646	uncharacterized LOC109995858 [Source:NCBI gene;Acc:109995858]	0	0	38.634	-1.08057	0.392662	-2.75192	0.00592472	0.245419
ENSLBEG00000020702	0	0	0	117.948	1.1365	0.413284	2.74992	0.00596092	0.24597
ENSLBEG00000019584	galectin-3-like [Source:NCBI gene;Acc:110003091]	lgals3b	LGALS14	885.709	0.602753	0.219298	2.74855	0.00598591	0.24597
ENSLBEG00000025117	0	0	0	338.638	-0.317147	0.11539	-2.74847	0.00598742	0.24597
ENSLBEG00000006998	opsin-5-like [Source:NCBI gene;Acc:110000477]	opn9	OPN9	14.4752	1.40922	0.513183	2.74603	0.00603209	0.247031
ENSLBEG00000020137	solute carrier family 25 member 24 [Source:NCBI gene;Acc:109997161]	0	0	258.017	0.477559	0.173954	2.74532	0.00604519	0.247031
ENSLBEG00000008455	periphilin-1-like [Source:NCBI gene;Acc:109980924]	0	0	316.001	-0.322763	0.117618	-2.74416	0.00606668	0.247031
ENSLBEG00000011897	Ets2 repressor factor like 3 [Source:ZFIN;Acc:ZDB-GENE-090529-4]	erfl3	ERF	688.276	-0.448769	0.163544	-2.74403	0.00606905	0.247031
ENSLBEG00000002003	SRY-box 7 [Source:NCBI gene;Acc:109987699]	sox7	SOX7	39.6829	0.687324	0.250733	2.74126	0.00612041	0.24855
ENSLBEG00000021175	0	0	0	31.388	-2.08448	0.760954	-2.73929	0.00615711	0.249469
ENSLBEG00000010713	ras and EF-hand domain-containing protein homolog [Source:NCBI gene;Acc:109988308]	CRACR2A	CRACR2A	115.172	0.488909	0.178627	2.73704	0.00619954	0.250043
ENSLBEG00000023573	TOX high mobility group box family member 2 [Source:NCBI gene;Acc:109997229]	tox2	TOX2	1116.33	-0.497984	0.181939	-2.73709	0.00619845	0.250043
ENSLBEG00000022650	tripartite motif-containing protein 16-like [Source:NCBI gene;Acc:109993921]	0	TRIM16L	17.0758	1.11183	0.407199	2.73042	0.00632537	0.251331
ENSLBEG00000004222	lipocalin 15 [Source:ZFIN;Acc:ZDB-GENE-060825-349]	lcn15	PTGDS	317.577	0.88159	0.322542	2.73325	0.0062712	0.251331
ENSLBEG00000015834	serum deprivation-response protein-like [Source:NCBI gene;Acc:110002505]	0	0	679.739	0.445518	0.16323	2.7294	0.00634501	0.251331
ENSLBEG00000022435	protein FAM53B-like [Source:NCBI gene;Acc:109987925]	0	0	572.804	-0.438574	0.160667	-2.7297	0.00633913	0.251331
ENSLBEG00000016104	semaphorin-7A-like [Source:NCBI gene;Acc:110003002]	0	SEMA7A	147.365	-0.503068	0.184214	-2.73088	0.00631649	0.251331
ENSLBEG00000004657	SH2 domain-containing protein 1A-like [Source:NCBI gene;Acc:109996286]	0	0	42.4452	-0.883628	0.323519	-2.7313	0.00630842	0.251331
ENSLBEG00000025331	PLAC8 like 1 [Source:NCBI gene;Acc:109995646]	plac8l1	PLAC8L1	107.329	-1.08314	0.396778	-2.72984	0.00633647	0.251331
ENSLBEG00000021504	charged multivesicular body protein 3-like [Source:NCBI gene;Acc:109992570]	chmp3	CHMP3	57.5759	-1.08638	0.397383	-2.73384	0.00626006	0.251331
ENSLBEG00000013573	mitochondrial translational initiation factor 2 [Source:NCBI gene;Acc:110005053]	mtif2	MTIF2	68.5796	0.56142	0.205751	2.72863	0.00635982	0.251355
ENSLBEG00000007530	cyclin-D1-binding protein 1 homolog [Source:NCBI gene;Acc:109999912]	0	CCNDBP1	39.8308	-1.34057	0.491873	-2.72544	0.00642152	0.253228
ENSLBEG00000025255	serine/threonine kinase 38 like [Source:NCBI gene;Acc:109997286]	stk38l	STK38L	186.511	-0.679511	0.249543	-2.72302	0.00646891	0.254172
ENSLBEG00000027824	macrophage mannose receptor 1-like [Source:NCBI gene;Acc:109984595]	0	MRC1	13.6627	-1.67026	0.613446	-2.72275	0.00647416	0.254172
ENSLBEG00000028714	synaptotagmin like 4 [Source:NCBI gene;Acc:109992701]	sytl4	SYTL4	67.803	0.848035	0.311729	2.72043	0.00651976	0.255396
ENSLBEG00000026246	Rho GTPase activating protein 35 [Source:NCBI gene;Acc:109988044]	0	ARHGAP35	498.742	-0.511338	0.188035	-2.71938	0.00654041	0.255639
ENSLBEG00000028325	matrix Gla protein [Source:NCBI gene;Acc:110001505]	0	0	533.934	0.798263	0.293664	2.71829	0.00656203	0.255919
ENSLBEG00000017288	ADAM metallopeptidase domain 23 [Source:NCBI gene;Acc:109984318]	ADAM23	ADAM23	19.536	0.968934	0.356574	2.71735	0.00658078	0.256086
ENSLBEG00000015228	phospholipase A2 group XIIA [Source:NCBI gene;Acc:109980032]	PLA2G12A	PLA2G12A	36.0395	0.573576	0.211145	2.7165	0.00659762	0.256179
ENSLBEG00000018465	transcription factor BTF3 homolog 4 [Source:NCBI gene;Acc:109996072]	btf3l4	BTF3L4	659.904	0.282847	0.104335	2.71096	0.00670896	0.259932
ENSLBEG00000007512	0	0	0	43.5442	-1.4251	0.525842	-2.71014	0.00672555	0.260006
ENSLBEG00000027088	nuclear GTPase SLIP-GC-like [Source:NCBI gene;Acc:109994210]	0	0	224.362	0.66334	0.24489	2.70873	0.00675418	0.260544
ENSLBEG00000019518	inactive serine protease PAMR1-like [Source:NCBI gene;Acc:109994338]	si:ch211-102l7.3	PAMR1	15.9569	1.56862	0.579945	2.70478	0.00683499	0.260548
ENSLBEG00000018446	prostaglandin F2-alpha receptor-like [Source:NCBI gene;Acc:109996097]	ptgfr	PTGFR	7.55669	1.44905	0.535131	2.70785	0.00677213	0.260548
ENSLBEG00000007062	semaphorin 5B [Source:NCBI gene;Acc:109996914]	sema5ba	SEMA5B	53.6222	0.813333	0.300725	2.70458	0.00683916	0.260548
ENSLBEG00000004285	coiled-coil domain containing 186 [Source:NCBI gene;Acc:109996887]	ccdc186	CCDC186	508.004	-0.292206	0.108008	-2.70541	0.00682204	0.260548
ENSLBEG00000005058	0	0	0	117.437	-1.10262	0.407712	-2.70441	0.00684258	0.260548
ENSLBEG00000014045	0	0	0	77.0865	-1.17866	0.435385	-2.70717	0.00678591	0.260548
ENSLBEG00000025593	transmembrane 4 L6 family member 5-like [Source:NCBI gene;Acc:109993285]	0	0	793.01	0.80988	0.299846	2.70099	0.00691342	0.262408
ENSLBEG00000011550	inositol-tetrakisphosphate 1-kinase-like [Source:NCBI gene;Acc:109991906]	0	ITPK1	49.6346	-0.586251	0.21708	-2.70062	0.00692107	0.262408
ENSLBEG00000012640	regulator of G protein signaling 11 [Source:NCBI gene;Acc:109995400]	rgs11	RGS11	9.4215	-1.44169	0.534072	-2.69942	0.00694599	0.26279
ENSLBEG00000005265	unconventional myosin-VIIa-like [Source:NCBI gene;Acc:109995422]	0	0	2888.22	-0.539597	0.20004	-2.69745	0.00698734	0.263791
ENSLBEG00000014441	0	0	0	289.994	-1.01784	0.377454	-2.69658	0.00700555	0.263915
ENSLBEG00000000892	fibroleukin-like [Source:NCBI gene;Acc:109991694]	fgl2a	FGL2	521.66	0.64234	0.238433	2.694	0.00705994	0.264243
ENSLBEG00000025366	discoidin, CUB and LCCL domain-containing protein 1-like [Source:NCBI gene;Acc:110000859]	si:dkey-34d22.1	SI:DKEY-34D22.1	308.072	0.374752	0.139176	2.69265	0.00708859	0.264243
ENSLBEG00000010598	zinc finger SWIM-type containing 5 [Source:NCBI gene;Acc:109997599]	zswim5	ZSWIM5	456.965	-0.384057	0.142621	-2.69286	0.00708427	0.264243
ENSLBEG00000009811	0	zgc:194282	SRMS	90.2588	-0.843341	0.313202	-2.69264	0.00708887	0.264243
ENSLBEG00000014551	0	0	0	23.8148	-2.89431	1.07422	-2.69435	0.00705261	0.264243
ENSLBEG00000028608	beta-2-microglobulin-like [Source:NCBI gene;Acc:109987643]	0		30495.9	-0.305838	0.113677	-2.6904	0.00713655	0.264971
ENSLBEG00000002358	0	RF01291	RF01291	6533.59	-0.775599	0.288292	-2.69032	0.00713833	0.264971
ENSLBEG00000028014	6-pyruvoyltetrahydropterin synthase [Source:NCBI gene;Acc:109988596]	pts	PTS	16.8265	0.916395	0.340841	2.68863	0.00717458	0.265383
ENSLBEG00000004802	SGT1 homolog, MIS12 kinetochore complex assembly cochaperone [Source:NCBI gene;Acc:109996092]	sugt1	SUGT1	312.106	-0.320767	0.119315	-2.68841	0.0071794	0.265383
ENSLBEG00000012715	0	RF00277	RF00277	6.20704	1.93048	0.718436	2.68706	0.00720848	0.265732
ENSLBEG00000005807	alkaline phosphatase, biomineralization associated [Source:NCBI gene;Acc:109991167]	alpl	ALPL	127.111	1.13042	0.420793	2.6864	0.00722275	0.265732
ENSLBEG00000001143	ubiquitin C-terminal hydrolase L1 [Source:NCBI gene;Acc:109998531]	uchl1	UCHL1	193.788	0.575535	0.214369	2.68479	0.00725758	0.265732
ENSLBEG00000014648	B-cell lymphoma/leukemia 11B-like [Source:NCBI gene;Acc:110000022]	BCL11B	BCL11B	281.585	-0.506969	0.188851	-2.6845	0.00726388	0.265732
ENSLBEG00000028976	tripartite motif-containing protein 35-like [Source:NCBI gene;Acc:109979776]	0	TRIM35	53.8546	-0.677044	0.252108	-2.68553	0.00724156	0.265732
ENSLBEG00000004406	ribosomal protein S6 kinase alpha-1-like [Source:NCBI gene;Acc:109990528]	rps6ka1	RPS6KA1	2654.56	-0.204833	0.0763535	-2.68269	0.00730317	0.266618
ENSLBEG00000006505	B-cell lymphoma/leukemia 11B-like [Source:NCBI gene;Acc:109983654]	im:7142702	BCL11B	168.528	-0.777168	0.289821	-2.68155	0.00732828	0.266985
ENSLBEG00000010189	carbohydrate sulfotransferase 11-like [Source:NCBI gene;Acc:109994151]	CHST13	CHST13	5.85673	1.58863	0.592606	2.68076	0.00734561	0.267067
ENSLBEG00000024111	serine/threonine-protein phosphatase 2A 56 kDa regulatory subunit gamma isoform-like [Source:NCBI gene;Acc:109982924]	ppp2r5cb	PPP2R5CB	955.053	-0.253337	0.0945657	-2.67896	0.00738523	0.267669
ENSLBEG00000010846	myelin-associated glycoprotein-like [Source:NCBI gene;Acc:109986663]	0	0	201.651	-1.24908	0.466313	-2.67863	0.0073924	0.267669
ENSLBEG00000017683	annexin A2-A-like [Source:NCBI gene;Acc:109982213]	anxa2a	ANXA2	424.51	1.09288	0.40822	2.67719	0.00742421	0.267832
ENSLBEG00000000794	kinesin family member 13A [Source:NCBI gene;Acc:109986449]	kif13a	KIF13A	59.8864	0.576459	0.215333	2.67706	0.00742718	0.267832
ENSLBEG00000021033	unc-79 homolog, NALCN channel complex subunit [Source:NCBI gene;Acc:109992569]	UNC79	UNC79	30.2109	0.648449	0.242295	2.67627	0.00744456	0.267914
ENSLBEG00000015865	centlein [Source:NCBI gene;Acc:109979994]	cntln	CNTLN	39.2271	0.611637	0.228677	2.67468	0.00748012	0.268103
ENSLBEG00000006592	ATP-binding cassette sub-family G member 2-like [Source:NCBI gene;Acc:109988281]	abcg2b	ABCG2	1734.95	-0.421303	0.157483	-2.67522	0.00746798	0.268103
ENSLBEG00000002674	60S acidic ribosomal protein P2-like [Source:NCBI gene;Acc:109982984]	rplp2l	RPLP2	6046.35	0.309795	0.115888	2.67324	0.00751233	0.268714
ENSLBEG00000028442	ubiquitin carboxyl-terminal hydrolase 15-like [Source:NCBI gene;Acc:109988113]	USP15	USP15	1063.67	-0.313012	0.117126	-2.67244	0.00753028	0.268813
ENSLBEG00000013076	0	0	0	71.6953	2.7999	1.05002	2.66653	0.00766395	0.269777
ENSLBEG00000009891	serpin family E member 1 [Source:NCBI gene;Acc:110001090]	serpine1	SERPINE1	84.471	1.18949	0.445981	2.66712	0.00765038	0.269777
ENSLBEG00000023323	ras-associated and pleckstrin homology domains-containing protein 1-like [Source:NCBI gene;Acc:109986946]	0	RAPH1	32.0217	0.841887	0.315459	2.66877	0.00761299	0.269777
ENSLBEG00000026923	phosphatidylinositol glycan anchor biosynthesis class F [Source:NCBI gene;Acc:109993336]	pigf	PIGF	42.9435	0.581725	0.217906	2.66962	0.00759377	0.269777
ENSLBEG00000011898	0	0	0	4204.17	0.40336	0.151112	2.66928	0.00760133	0.269777
ENSLBEG00000026472	phosphoinositide-3-kinase regulatory subunit 6 [Source:NCBI gene;Acc:110001993]	PIK3R6	PIK3R6	922.171	-0.396871	0.148748	-2.66807	0.00762877	0.269777
ENSLBEG00000002050	lymphocyte cytosolic protein 2-like [Source:NCBI gene;Acc:109983599]	lcp2a	LCP2	525.483	-0.520969	0.195289	-2.66768	0.00763776	0.269777
ENSLBEG00000002957	haptoglobin-like [Source:NCBI gene;Acc:109982979]	hp	PRSS54	14.9598	2.48799	0.933982	2.66385	0.00772514	0.269789
ENSLBEG00000014153	uncharacterized protein KIAA1210-like [Source:NCBI gene;Acc:109984300]	0	0	343.278	0.385211	0.144607	2.66385	0.00772522	0.269789
ENSLBEG00000023611	F-actin-methionine sulfoxide oxidase mical1-like [Source:NCBI gene;Acc:109996230]	mical1	MICAL1	1596.77	-0.333451	0.125119	-2.66508	0.00769698	0.269789
ENSLBEG00000022088	vasodilator-stimulated phosphoprotein-like [Source:NCBI gene;Acc:109993214]	0	0	824.988	-0.480041	0.180145	-2.66474	0.00770468	0.269789
ENSLBEG00000021624	fetuin-B-like [Source:NCBI gene;Acc:109993821]	FETUB	FETUB	98.2748	1.38872	0.521841	2.66119	0.00778643	0.27112
ENSLBEG00000004756	non-muscle caldesmon-like [Source:NCBI gene;Acc:109984846]	lsp1	LSP1	255.78	0.697053	0.261965	2.66087	0.00779396	0.27112
ENSLBEG00000024092	RRP15-like protein [Source:NCBI gene;Acc:110000816]	rrp15	RRP15	82.7072	1.13171	0.425476	2.65988	0.00781696	0.271213
ENSLBEG00000012898	ecto-ADP-ribosyltransferase 4-like [Source:NCBI gene;Acc:109989063]	0	0	65.5552	-0.933626	0.351062	-2.65943	0.00782728	0.271213
ENSLBEG00000001069	sushi, von Willebrand factor type A, EGF and pentraxin domain containing 1 [Source:NCBI gene;Acc:109988734]	svep1	SVEP1	89.7606	0.686351	0.258181	2.65841	0.0078511	0.271507
ENSLBEG00000004422	nuclear receptor-binding protein-like [Source:NCBI gene;Acc:109992329]	0	0	303.288	-0.343645	0.129404	-2.6556	0.00791686	0.273247
ENSLBEG00000018736	0	0	0	17.331	1.55417	0.58704	2.64747	0.00810962	0.274979
ENSLBEG00000017678	dihydropyrimidinase-related protein 5-like [Source:NCBI gene;Acc:109988434]	dpysl5b	DPYSL5	16.8498	0.989323	0.373764	2.64692	0.00812285	0.274979
ENSLBEG00000020695	C1q and TNF related 5 [Source:NCBI gene;Acc:109999614]	c1qtnf5	C1QTNF5	218.703	0.925877	0.349047	2.65259	0.0079878	0.274979
ENSLBEG00000022664	retinoid-binding protein 7-like [Source:NCBI gene;Acc:109980638]	rbp7b	RBP7B	52.8896	0.735919	0.278162	2.64565	0.0081534	0.274979
ENSLBEG00000015843	ORM1-like protein 2 [Source:NCBI gene;Acc:109985285]	ormdl2	ORMDL2	185.943	0.345686	0.130527	2.64838	0.00808791	0.274979
ENSLBEG00000001053	Sp2 transcription factor [Source:NCBI gene;Acc:109988201]	sp2	SP2	587.903	-0.242984	0.0916471	-2.65131	0.00801809	0.274979
ENSLBEG00000006703	TAP binding protein like [Source:NCBI gene;Acc:110000473]	tapbpl	TAPBPL	994.51	-0.415354	0.156796	-2.649	0.008073	0.274979
ENSLBEG00000025480	Rho GTPase activating protein 26 [Source:NCBI gene;Acc:109995641]	ARHGAP26	ARHGAP26	139.303	-0.586867	0.22146	-2.64999	0.00804949	0.274979
ENSLBEG00000024442	0	0	0	511.25	-0.665294	0.251428	-2.64606	0.00814354	0.274979
ENSLBEG00000010696	uridine-cytidine kinase 2-B [Source:NCBI gene;Acc:109996876]	uck2b	UCK2	114.608	-0.755589	0.285387	-2.64759	0.00810676	0.274979
ENSLBEG00000026208	0	0	0	16.8458	-1.31416	0.496053	-2.64923	0.00806759	0.274979
ENSLBEG00000027091	solute carrier family 6 (neurotransmitter transporter), member 8 [Source:ZFIN;Acc:ZDB-GENE-071024-2]	slc6a8	SLC6A8	27.1705	-1.70241	0.642557	-2.64943	0.00806277	0.274979
ENSLBEG00000011270	carcinoembryonic antigen-related cell adhesion molecule 5-like [Source:NCBI gene;Acc:109988997]	si:ch211-264f5.6	CEACAM5	409.098	0.965185	0.365114	2.64352	0.0082049	0.275144
ENSLBEG00000021606	C-X-C chemokine receptor type 3-2-like [Source:NCBI gene;Acc:110001247]	cxcr3.2	CXCR3.2	211.502	0.668883	0.253002	2.64379	0.00819839	0.275144
ENSLBEG00000015650	carcinoembryonic antigen-related cell adhesion molecule 1-like [Source:NCBI gene;Acc:110005120]	0	0	548.165	-0.940428	0.355611	-2.64454	0.00818021	0.275144
ENSLBEG00000027578	beta-adducin-like [Source:NCBI gene;Acc:109985929]	add2	ADD2	8.85569	1.39124	0.526524	2.64231	0.00823435	0.27561
ENSLBEG00000004014	C-X-C chemokine receptor type 1-like [Source:NCBI gene;Acc:109999265]	0	CXCR1	66.8101	1.39103	0.527436	2.63734	0.00835592	0.275957
ENSLBEG00000000934	0	0	0	14.8097	1.31544	0.498819	2.63711	0.00836158	0.275957
ENSLBEG00000007797	tubulin polymerization promoting protein family member 3 [Source:NCBI gene;Acc:110001056]	tppp3	TPPP3	343.956	0.803946	0.305045	2.6355	0.00840136	0.275957
ENSLBEG00000020627	crystallin zeta [Source:NCBI gene;Acc:110005596]	cryz	CRYZ	485.433	0.363428	0.137962	2.63427	0.00843177	0.275957
ENSLBEG00000013254	phosphatidylcholine:ceramide cholinephosphotransferase 2-like [Source:NCBI gene;Acc:110005037]	0	SGMS2	183.747	-0.468433	0.177653	-2.63678	0.00836964	0.275957
ENSLBEG00000009905	ETS proto-oncogene 1, transcription factor [Source:NCBI gene;Acc:109995361]	ets1	ETS1	2899.94	-0.520248	0.197407	-2.63541	0.0084036	0.275957
ENSLBEG00000021058	TRAF2 and NCK interacting kinase a [Source:ZFIN;Acc:ZDB-GENE-030131-3767]	tnika	TNIK	123.46	-0.712391	0.269981	-2.63867	0.00832312	0.275957
ENSLBEG00000018542	stanniocalcin-like [Source:NCBI gene;Acc:109976417]	0	0	11.957	-0.974491	0.369429	-2.63783	0.00834374	0.275957
ENSLBEG00000007850	E3 ubiquitin-protein ligase RNF5-like [Source:NCBI gene;Acc:109978017]	RNF5	RNF5	17.5461	-0.978653	0.371386	-2.63514	0.00841035	0.275957
ENSLBEG00000006040	NFKB inhibitor delta [Source:NCBI gene;Acc:109986694]	0	0	16.1122	-1.31639	0.498733	-2.63947	0.00830346	0.275957
ENSLBEG00000010430	0	0	0	103.208	-1.3167	0.498592	-2.64083	0.00827023	0.275957
ENSLBEG00000018184	0	0	0	12.9184	-3.5275	1.33878	-2.63485	0.00841736	0.275957
ENSLBEG00000026644	keratin, type I cytoskeletal 18-like [Source:NCBI gene;Acc:109991643]	krt1-c5	KRT1-C5	24.7931	1.19073	0.45244	2.63179	0.00849368	0.27696
ENSLBEG00000002940	ribosomal protein S6 kinase alpha-4-like [Source:NCBI gene;Acc:109991032]	rps6ka4	RPS6KA4	471.714	-0.223261	0.0848173	-2.63225	0.00848203	0.27696
ENSLBEG00000010618	CUGBP Elav-like family member 2 [Source:NCBI gene;Acc:110003753]	0	0	1452.59	-0.267674	0.101802	-2.62936	0.00855446	0.276986
ENSLBEG00000013769	LCK proto-oncogene, Src family tyrosine kinase [Source:NCBI gene;Acc:109992417]	lck	LCK	615.835	-0.561156	0.213402	-2.62957	0.00854925	0.276986
ENSLBEG00000000377	delta-like protein A [Source:NCBI gene;Acc:109988183]	dla	DLL1	130.581	-0.583748	0.22202	-2.62926	0.00855707	0.276986
ENSLBEG00000026358	0	0	0	91.5908	-0.594484	0.226021	-2.63021	0.00853319	0.276986
ENSLBEG00000010614	dermatan sulfate epimerase [Source:NCBI gene;Acc:109986108]	dse	DSE	195.327	0.485305	0.184811	2.62595	0.0086407	0.277663
ENSLBEG00000012644	tumor necrosis factor ligand superfamily member 14-like [Source:NCBI gene;Acc:109989552]	0	0	434.86	-0.513191	0.19537	-2.62677	0.00861994	0.277663
ENSLBEG00000005068	ephrin A4 [Source:NCBI gene;Acc:109989996]	0	0	637.404	-0.549756	0.209319	-2.6264	0.00862933	0.277663
ENSLBEG00000007881	membrane-associated phosphatidylinositol transfer protein 2-like [Source:NCBI gene;Acc:110000491]	PITPNM2	PITPNM2	6.3818	-1.41214	0.537649	-2.62651	0.00862646	0.277663
ENSLBEG00000028668	rho GTPase-activating protein 29-like [Source:NCBI gene;Acc:109992676]	arhgap29a	ARHGAP29	97.7114	0.703541	0.268061	2.62456	0.0086762	0.278298
ENSLBEG00000014034	ER membrane protein complex subunit 7 [Source:NCBI gene;Acc:109978671]	emc7	EMC7	438.834	0.306474	0.1168	2.62391	0.00869256	0.278319
ENSLBEG00000018536	atrial natriuretic peptide receptor 2-like [Source:NCBI gene;Acc:109985663]	npr2	NPR2	104.09	0.523174	0.199528	2.62205	0.0087402	0.278457
ENSLBEG00000016746	MLLT6, PHD finger containing [Source:NCBI gene;Acc:109997709]	MLLT6	MLLT6	742.289	-0.508621	0.193937	-2.62261	0.00872597	0.278457
ENSLBEG00000001037	protein unc-13 homolog A-like [Source:NCBI gene;Acc:109984025]	UNC13A	UNC13A	25.4127	-0.751338	0.286562	-2.6219	0.00874404	0.278457
ENSLBEG00000018822	cell division cycle 20 homolog [Source:ZFIN;Acc:ZDB-GENE-040426-2044]	cdc20	CDC20	512.968	-0.668971	0.255235	-2.621	0.00876734	0.278698
ENSLBEG00000009545	DNA-directed RNA polymerase III subunit RPC4-like [Source:NCBI gene;Acc:109996958]	zgc:171971	ZGC:171971	273.766	-0.349745	0.133532	-2.61918	0.00881412	0.279682
ENSLBEG00000005435	CASC3, exon junction complex subunit [Source:NCBI gene;Acc:109998010]	casc3	CASC3	629.573	-0.301222	0.11505	-2.61818	0.00884008	0.280005
ENSLBEG00000004446	0	0	0	24.4464	1.51242	0.578094	2.61621	0.00889114	0.280118
ENSLBEG00000018214	semaphorin-4D-like [Source:NCBI gene;Acc:109975235]	0	0	117.185	-0.726492	0.277658	-2.6165	0.00888368	0.280118
ENSLBEG00000007697	0	0	0	13.5103	-0.981425	0.375073	-2.61662	0.00888051	0.280118
ENSLBEG00000023461	tapasin-related protein-like [Source:NCBI gene;Acc:109996708]	0	0	241.724	-0.466642	0.17843	-2.61527	0.00891565	0.280392
ENSLBEG00000007788	monoglyceride lipase [Source:NCBI gene;Acc:109993563]	mgll	MGLL	71.7865	-0.902498	0.345291	-2.61373	0.00895592	0.281159
ENSLBEG00000021726	protein kinase C beta [Source:NCBI gene;Acc:109993844]	prkcbb	PRKCBB	157.096	-0.681858	0.260949	-2.61299	0.00897528	0.281268
ENSLBEG00000012869	inhibin beta B chain-like [Source:NCBI gene;Acc:109994746]	0	0	123.694	0.91634	0.350804	2.61211	0.00899847	0.281444
ENSLBEG00000023287	WD repeat domain 35 [Source:NCBI gene;Acc:109989732]	wdr35	WDR35	23.6602	0.792984	0.303642	2.61157	0.00901271	0.281444
ENSLBEG00000014468	dual specificity protein phosphatase 2-like [Source:NCBI gene;Acc:109994208]	dusp2	DUSP2	293.053	-0.900609	0.344961	-2.61076	0.00903424	0.28162
ENSLBEG00000015463	WNK lysine deficient protein kinase 1b [Source:ZFIN;Acc:ZDB-GENE-030131-2656]	wnk1b	WNK1	59.6271	-0.702667	0.269312	-2.60912	0.00907765	0.281981
ENSLBEG00000028253	FERM and PDZ domain-containing protein 4-like [Source:NCBI gene;Acc:109995101]	0	0	8.17527	-2.07371	0.794616	-2.6097	0.00906222	0.281981
ENSLBEG00000002260	0	0	0	13.424	2.64723	1.01632	2.60471	0.00919517	0.284772
ENSLBEG00000016920	glutaredoxin 3 [Source:ZFIN;Acc:ZDB-GENE-041010-22]	glrx3	GLRX3	30.2543	0.849982	0.326346	2.60454	0.0091997	0.284772
ENSLBEG00000000196	adseverin-like [Source:NCBI gene;Acc:109982742]	0		129.892	0.706158	0.271342	2.60247	0.00925549	0.286
ENSLBEG00000017778	AF4/FMR2 family member 4 [Source:NCBI gene;Acc:109987289]	aff4	AFF4	1388.84	-0.290173	0.111586	-2.60044	0.00931041	0.286749
ENSLBEG00000019915	sortilin-like [Source:NCBI gene;Acc:109982819]	sort1b	SORT1	2236.35	-0.33067	0.127186	-2.59988	0.00932554	0.286749
ENSLBEG00000024501	ligand-dependent corepressor-like [Source:NCBI gene;Acc:109996733]	0	0	524.278	-0.340936	0.13117	-2.59918	0.00934454	0.286749
ENSLBEG00000018923	hyaluronidase-2-like [Source:NCBI gene;Acc:109990332]	HYAL2	HYAL2	2554.52	-0.823356	0.316741	-2.59946	0.00933697	0.286749
ENSLBEG00000013858	0	0	0	90.9544	5.34687	2.05967	2.59598	0.00943222	0.288054
ENSLBEG00000010700	cdc42 effector protein 2-like [Source:NCBI gene;Acc:109991248]	zgc:154093	ZGC:154093	8.05336	1.59496	0.614467	2.59568	0.00944035	0.288054
ENSLBEG00000006249	0	0	0	82.979	1.39577	0.537815	2.59525	0.00945212	0.288054
ENSLBEG00000021924	ELAV-like protein 1 [Source:NCBI gene;Acc:109996183]	elavl1a	ELAVL1	762.269	-0.320553	0.123501	-2.59556	0.00944363	0.288054
ENSLBEG00000023848	netrin-G2-like [Source:NCBI gene;Acc:109984480]	NTNG2	NTNG2	133.926	1.32757	0.511984	2.59299	0.00951468	0.288806
ENSLBEG00000025936	pleiotrophin [Source:NCBI gene;Acc:109995653]	ptn	PTN	80.4073	0.672266	0.259303	2.59259	0.00952575	0.288806
ENSLBEG00000009623	activating signal cointegrator 1 complex subunit 3-like [Source:NCBI gene;Acc:110001643]	ascc3	ASCC3	180.515	0.433376	0.167142	2.59287	0.009518	0.288806
ENSLBEG00000024647	gap junction Cx32.2 protein [Source:NCBI gene;Acc:109986418]	0	GJB1	17.4977	1.84575	0.712268	2.59138	0.00955931	0.288931
ENSLBEG00000002154	cyclic AMP-responsive element-binding protein 5-like [Source:NCBI gene;Acc:109989929]	0	CREB5	7.63919	1.50912	0.582387	2.59126	0.00956251	0.288931
ENSLBEG00000000051	lin-52 DREAM MuvB core complex component [Source:NCBI gene;Acc:109981264]	lin52	LIN52	88.4884	-0.5379	0.207649	-2.59042	0.0095858	0.289142
ENSLBEG00000021037	calpain-3-like [Source:NCBI gene;Acc:109989649]	capn3b	CAPN3	110.19	0.716576	0.276908	2.58778	0.00965962	0.289887
ENSLBEG00000004070	Coenzyme A synthase [Source:NCBI gene;Acc:109999818]	coasy	COASY	271.607	0.414433	0.160116	2.58834	0.00964407	0.289887
ENSLBEG00000002495	LIM domain and actin binding 1 [Source:NCBI gene;Acc:109999768]	lima1a	LIMA1	777.677	-0.46825	0.180885	-2.58867	0.00963486	0.289887
ENSLBEG00000012813	calcium-binding mitochondrial carrier protein SCaMC-1-A-like [Source:NCBI gene;Acc:110003808]	slc25a24l	SLC25A25	368.039	-0.507005	0.196009	-2.58663	0.00969183	0.290361
ENSLBEG00000001455	cyclin dependent kinase 5 [Source:NCBI gene;Acc:109995722]	cdk5	CDK5	102.12	-0.499736	0.193247	-2.58599	0.00970997	0.290413
ENSLBEG00000021778	phosphogluconate dehydrogenase [Source:NCBI gene;Acc:109982867]	pgd	PGD	2725.48	0.455424	0.176153	2.5854	0.00972669	0.290423
ENSLBEG00000008158	zinc finger CCHC domain-containing protein 24-like [Source:NCBI gene;Acc:109992985]	0	0	16.6112	0.907719	0.351343	2.58357	0.00977841	0.290497
ENSLBEG00000018170	macrophage colony-stimulating factor 1 receptor 2-like [Source:NCBI gene;Acc:110000123]	0	0	421.165	0.733899	0.283979	2.58435	0.00975633	0.290497
ENSLBEG00000026438	zinc fingers and homeoboxes protein 2-like [Source:NCBI gene;Acc:109995677]	0	0	17.4905	-1.12813	0.4366	-2.5839	0.009769	0.290497
ENSLBEG00000027397	2-acylglycerol O-acyltransferase 2-A-like [Source:NCBI gene;Acc:110002816]	mogat3a	MOGAT1	77.2337	0.567288	0.21965	2.58269	0.00980327	0.290748
ENSLBEG00000008068	WD repeat domain 46 [Source:NCBI gene;Acc:109980936]	wdr46	WDR46	731.809	-0.603732	0.233984	-2.58023	0.0098734	0.292339
ENSLBEG00000021174	B2 bradykinin receptor-like [Source:NCBI gene;Acc:109982343]	si:dkey-63b1.1	BDKRB2	40.8094	1.01333	0.393132	2.57758	0.0099494	0.294097
ENSLBEG00000023517	pyrroline-5-carboxylate reductase 1, mitochondrial-like [Source:NCBI gene;Acc:109994715]	pycr1a		83.1005	0.692498	0.268914	2.57516	0.0100193	0.295668
ENSLBEG00000015154	gap junction protein delta 3 [Source:HGNC Symbol;Acc:HGNC:19147]	GJD3		430.853	-0.677783	0.263488	-2.57235	0.010101	0.296161
ENSLBEG00000006130	wntless Wnt ligand secretion mediator [Source:NCBI gene;Acc:109995717]	wls		560.221	0.335662	0.130523	2.57166	0.0101213	0.296161
ENSLBEG00000011337	inositol monophosphatase 1-like [Source:NCBI gene;Acc:109983771]	0		1344.74	0.937842	0.364723	2.57138	0.0101295	0.296161
ENSLBEG00000005729	zinc finger protein 652 [Source:NCBI gene;Acc:109983061]	znf652		205.866	-0.581144	0.226085	-2.57046	0.0101562	0.296161
ENSLBEG00000010047	0	0		7.71975	-1.59046	0.618793	-2.57027	0.010162	0.296161
ENSLBEG00000015689	granzyme A-like [Source:NCBI gene;Acc:109997685]	0		102.654	-1.18164	0.459799	-2.5699	0.0101727	0.296161
ENSLBEG00000019463	toll-like receptor 9 [Source:ZFIN;Acc:ZDB-GENE-040219-10]	tlr9		12.5811	1.69735	0.660573	2.56951	0.0101842	0.296161
ENSLBEG00000001957	transmembrane protein 88-like [Source:NCBI gene;Acc:109991038]	tmem88a		36.1911	0.821272	0.319755	2.56844	0.0102156	0.296161
ENSLBEG00000017475	low density lipoprotein receptor [Source:NCBI gene;Acc:110000662]	ldlra		163.051	1.01958	0.397039	2.56795	0.0102301	0.296161
ENSLBEG00000023075	0	0		18.1694	-3.18095	1.23878	-2.56781	0.0102342	0.296161
ENSLBEG00000020714	histone deacetylase 7-like [Source:NCBI gene;Acc:109993810]	hdac7b		485.208	-0.397078	0.154652	-2.56757	0.0102415	0.296161
ENSLBEG00000000959	0	0		9.61007	2.19161	0.853693	2.56722	0.0102518	0.296161
ENSLBEG00000025196	membrane-spanning 4-domains subfamily A member 12-like [Source:NCBI gene;Acc:110001352]	tmem176		581.667	0.470578	0.183352	2.56652	0.0102725	0.296161
ENSLBEG00000012010	0	0		10.9694	1.55348	0.605397	2.56605	0.0102864	0.296161
ENSLBEG00000016913	tensin 4 [Source:NCBI gene;Acc:109997727]	0		200.54	-0.549727	0.21427	-2.56559	0.0103002	0.296161
ENSLBEG00000009981	CRK like proto-oncogene, adaptor protein [Source:NCBI gene;Acc:109991884]	crkl		778.235	-0.248152	0.0967276	-2.56547	0.0103036	0.296161
ENSLBEG00000014167	twisted gastrulation BMP signaling modulator 1 [Source:NCBI gene;Acc:109981224]	twsg1a		35.8512	0.756457	0.295069	2.56366	0.0103575	0.296922
ENSLBEG00000002211	electron transfer flavoprotein dehydrogenase [Source:NCBI gene;Acc:109999762]	etfdh		736.271	0.418207	0.163235	2.56199	0.0104075	0.296922
ENSLBEG00000025227	bromo adjacent homology domain-containing 1 protein-like [Source:NCBI gene;Acc:109982934]	0		63.7806	-0.60872	0.237635	-2.56157	0.0104199	0.296922
ENSLBEG00000026233	phospholipase A2 group IVA [Source:NCBI gene;Acc:110001344]	pla2g4ab		188.302	-0.349254	0.136385	-2.56079	0.0104433	0.296922
ENSLBEG00000028754	protein CYR61-like [Source:NCBI gene;Acc:109992745]	cyr61l2		62.5987	0.657994	0.256965	2.56063	0.0104482	0.296922
ENSLBEG00000009945	0	0		213.57	-0.705881	0.275701	-2.56031	0.0104578	0.296922
ENSLBEG00000018819	leukotriene C4 synthase [Source:NCBI gene;Acc:109987337]	ltc4s		28.0566	-1.28505	0.501924	-2.56025	0.0104596	0.296922
ENSLBEG00000006763	coiled-coil domain-containing protein 102A-like [Source:NCBI gene;Acc:110003667]	CCDC102A		20.0715	1.04861	0.409606	2.56006	0.0104655	0.296922
ENSLBEG00000017551	nicotinamide riboside kinase 2-like [Source:NCBI gene;Acc:110005297]	nmrk2		25.2505	-1.07948	0.421925	-2.55847	0.0105134	0.296922
ENSLBEG00000005355	exocyst complex component 3 like 4 [Source:NCBI gene;Acc:109995814]	exoc3l4		698.302	-0.348374	0.136199	-2.55782	0.010533	0.296922
ENSLBEG00000023964	immediate early response 5 like [Source:HGNC Symbol;Acc:HGNC:23679]	IER5L		44.0218	0.714222	0.279232	2.55781	0.0105334	0.296922
ENSLBEG00000023139	phosphatase and actin regulator 3-like [Source:NCBI gene;Acc:109982808]	phactr3a		5.63026	2.14446	0.838423	2.55773	0.0105356	0.296922
ENSLBEG00000010360	uncharacterized LOC109996447 [Source:NCBI gene;Acc:109996447]	si:ch211-214j24.10		379.247	0.324719	0.126976	2.55733	0.0105481	0.296922
ENSLBEG00000017146	LDL receptor related protein 11 [Source:NCBI gene;Acc:109988451]	lrp11		19.3727	0.674094	0.26374	2.55591	0.0105912	0.297663
ENSLBEG00000011546	triple functional domain protein-like [Source:NCBI gene;Acc:110001684]	triob		44.9411	0.683766	0.267684	2.55438	0.0106378	0.297708
ENSLBEG00000027136	phosphoethanolamine N-methyltransferase 3-like [Source:NCBI gene;Acc:109992610]	pmt		463.948	0.785945	0.307764	2.55373	0.0106576	0.297708
ENSLBEG00000005189	0	0		9.33952	-1.75471	0.687352	-2.55286	0.0106843	0.297708
ENSLBEG00000020614	cytokine-inducible SH2-containing protein-like [Source:NCBI gene;Acc:109990346]	CISH		7.86671	1.80431	0.706804	2.55277	0.010687	0.297708
ENSLBEG00000018391	anti-Mullerian hormone [Source:NCBI gene;Acc:109982778]	amh		12.0097	1.30563	0.511495	2.55258	0.0106928	0.297708
ENSLBEG00000000358	angiopoietin-related protein 4-like [Source:NCBI gene;Acc:110000515]	0		1015.93	0.653085	0.255856	2.55255	0.0106937	0.297708
ENSLBEG00000023709	FES proto-oncogene, tyrosine kinase [Source:NCBI gene;Acc:110005749]	fes		277.197	-0.491851	0.192775	-2.55142	0.0107285	0.297793
ENSLBEG00000003724	intercellular adhesion molecule 1-like [Source:NCBI gene;Acc:109997714]	0		59.6461	0.97864	0.383576	2.55136	0.0107304	0.297793
ENSLBEG00000015390	E3 ubiquitin-protein ligase TRIM39-like [Source:NCBI gene;Acc:109998602]	TRIM39		19.5678	1.08421	0.425138	2.55025	0.0107645	0.297997
ENSLBEG00000016857	C-C motif chemokine 21-like [Source:NCBI gene;Acc:109989149]	0		458.46	-1.30045	0.510181	-2.549	0.0108031	0.297997
ENSLBEG00000003005	caveolin 2 [Source:NCBI gene;Acc:109986515]	cav2		309.282	0.404117	0.15857	2.54851	0.0108183	0.297997
ENSLBEG00000003877	coiled-coil domain-containing protein 50-like [Source:NCBI gene;Acc:109987746]	ccdc50		636.46	-0.287734	0.112924	-2.54803	0.0108335	0.297997
ENSLBEG00000023149	signal peptide peptidase like 3 [Source:NCBI gene;Acc:109981166]	sppl3		673.029	-0.266158	0.104486	-2.5473	0.0108559	0.297997
ENSLBEG00000008675	0	0		63.7586	0.553666	0.217374	2.54707	0.0108632	0.297997
ENSLBEG00000025749	STEAP3 metalloreductase [Source:NCBI gene;Acc:109997308]	STEAP3		94.358	0.532532	0.209093	2.54687	0.0108695	0.297997
ENSLBEG00000016794	HECT and RLD domain containing E3 ubiquitin protein ligase 3 [Source:NCBI gene;Acc:109980514]	herc3		660.538	-0.334776	0.131471	-2.54639	0.0108844	0.297997
ENSLBEG00000008454	0	0		6.83755	1.85407	0.728262	2.54588	0.0109003	0.297997
ENSLBEG00000005402	rho/rac guanine nucleotide exchange factor (GEF) 18b [Source:ZFIN;Acc:ZDB-GENE-070705-462]	arhgef18b		260.987	-0.44567	0.175068	-2.5457	0.010906	0.297997
ENSLBEG00000028232	cystatin F [Source:NCBI gene;Acc:109976841]	CST7		138.747	-0.400735	0.157455	-2.54508	0.0109254	0.298065
ENSLBEG00000011830	matrix metallopeptidase 2 [Source:NCBI gene;Acc:109985493]	mmp2		1386.14	0.418695	0.164599	2.54372	0.0109679	0.298411
ENSLBEG00000000834	uncharacterized LOC110005490 [Source:NCBI gene;Acc:110005490]	0		263.36	1.63591	0.643339	2.54284	0.0109954	0.298411
ENSLBEG00000000932	phosphatidylserine synthase 1 [Source:NCBI gene;Acc:109986489]	ptdss1a		479.644	-0.299977	0.117998	-2.54223	0.0110148	0.298411
ENSLBEG00000018014	ETS-related transcription factor Elf-2-like [Source:NCBI gene;Acc:109998805]	elf2b		680.068	-0.330827	0.130137	-2.54215	0.0110171	0.298411
ENSLBEG00000011384	si:dkey-27i16.2 [Source:ZFIN;Acc:ZDB-GENE-030131-9667]	si:dkey-27i16.2		480.931	-0.516426	0.203158	-2.54199	0.0110223	0.298411
ENSLBEG00000004474	paraspeckle component 1 [Source:NCBI gene;Acc:109984127]	pspc1		97.5513	-0.516168	0.203214	-2.54002	0.0110847	0.298805
ENSLBEG00000021251	interferon-induced transmembrane protein 1-like [Source:NCBI gene;Acc:110005412]	0		55.3684	-1.75095	0.689399	-2.53982	0.0110911	0.298805
ENSLBEG00000014479	tyrosine-protein phosphatase non-receptor type 11-like [Source:NCBI gene;Acc:109985568]	ptpn11b		181.84	-0.374569	0.147487	-2.53968	0.0110955	0.298805
ENSLBEG00000002144	regulating synaptic membrane exocytosis 2 [Source:NCBI gene;Acc:109983559]	RIMS2		63.5696	1.06768	0.420609	2.53841	0.0111357	0.298805
ENSLBEG00000024542	solute carrier family 25 member 1 [Source:NCBI gene;Acc:109991547]	si:dkey-178e17.1		49.1565	0.667633	0.263101	2.53756	0.011163	0.298805
ENSLBEG00000010927	endophilin-A3-like [Source:NCBI gene;Acc:110001663]	sh3gl3a		125.14	-0.717903	0.282934	-2.53735	0.0111694	0.298805
ENSLBEG00000018866	von Willebrand factor A domain containing 7 [Source:ZFIN;Acc:ZDB-GENE-060503-234]	vwa7		31.2086	-0.762398	0.300493	-2.53716	0.0111757	0.298805
ENSLBEG00000002360	polycomb group ring finger 5 [Source:NCBI gene;Acc:109976569]	pcgf5a		275.247	-0.364969	0.143885	-2.53653	0.0111956	0.298805
ENSLBEG00000010862	glucose-6-phosphate 1-dehydrogenase [Source:NCBI gene;Acc:109986159]	g6pd		959.944	0.403595	0.159127	2.53631	0.0112028	0.298805
ENSLBEG00000012917	COP9 signalosome complex subunit 9-like [Source:NCBI gene;Acc:109985033]	0		9.70939	1.35653	0.534864	2.53622	0.0112056	0.298805
ENSLBEG00000005812	cathepsin K-like [Source:NCBI gene;Acc:109999879]	ctsk		1666.52	0.596445	0.235494	2.53274	0.0113176	0.300351
ENSLBEG00000013028	protein phosphatase 1 regulatory subunit 10 [Source:NCBI gene;Acc:109993624]	ppp1r10		207.872	0.433767	0.171362	2.53129	0.0113645	0.300351
ENSLBEG00000012254	spliceosome RNA helicase DDX39B-like [Source:NCBI gene;Acc:109993619]	ddx39b		64.2086	-0.741599	0.293024	-2.53084	0.0113789	0.300351
ENSLBEG00000005046	early growth response 1 [Source:NCBI gene;Acc:109993510]	egr1		1262.23	-0.955055	0.377389	-2.53069	0.0113838	0.300351
ENSLBEG00000018803	0	0		81.2564	0.670221	0.26489	2.53018	0.0114003	0.300351
ENSLBEG00000020182	transmembrane 4 L six family member 4 [Source:NCBI gene;Acc:109997154]	tm4sf4		503.655	0.483829	0.191235	2.53003	0.0114053	0.300351
ENSLBEG00000018356	matrix metallopeptidase 13 [Source:NCBI gene;Acc:109992108]	mmp13b		27	4.15232	1.64127	2.52995	0.0114078	0.300351
ENSLBEG00000019802	chemokine-like receptor 1 [Source:NCBI gene;Acc:109981205]	0		64.0867	0.67435	0.266565	2.52978	0.0114135	0.300351
ENSLBEG00000012513	ubiquitin specific peptidase 33 [Source:NCBI gene;Acc:109980943]	usp33		605.495	-0.301046	0.119005	-2.52969	0.0114163	0.300351
ENSLBEG00000000444	uncharacterized LOC109992833 [Source:NCBI gene;Acc:109992833]	0		16.4256	-1.24161	0.491184	-2.52779	0.0114782	0.301087
ENSLBEG00000012077	chromodomain helicase DNA binding protein 9 [Source:NCBI gene;Acc:109988751]	chd9		2386.39	-0.190822	0.0754942	-2.52764	0.0114833	0.301087
ENSLBEG00000001223	putative E3 ubiquitin-protein ligase UBR7 [Source:NCBI gene;Acc:110004250]	0		35.2338	-0.906682	0.358759	-2.52727	0.0114952	0.301087
ENSLBEG00000006464	Janus kinase 1 [Source:NCBI gene;Acc:109998031]	jak1		1436.04	-0.27445	0.108636	-2.52633	0.0115261	0.301235
ENSLBEG00000005338	transmembrane p24 trafficking protein 6 [Source:NCBI gene;Acc:109984862]	tmed6		44.5822	1.60176	0.634094	2.52606	0.0115349	0.301235
ENSLBEG00000027595	matrix metallopeptidase 28 [Source:NCBI gene;Acc:109989859]	mmp28		274.541	-0.373123	0.147954	-2.52189	0.0116727	0.303307
ENSLBEG00000007958	0	0		157.308	-1.9794	0.784946	-2.5217	0.0116788	0.303307
ENSLBEG00000008403	V-type proton ATPase subunit B, brain isoform [Source:NCBI gene;Acc:109977660]	atp6v1b2		6.49143	2.67557	1.06104	2.52166	0.0116804	0.303307
ENSLBEG00000018659	pleckstrin 2 [Source:NCBI gene;Acc:110002562]	plek2		53.6319	1.30769	0.518599	2.52158	0.0116828	0.303307
ENSLBEG00000007835	M-phase phosphoprotein 9 [Source:NCBI gene;Acc:110000492]	MPHOSPH9		222.645	-0.333963	0.132505	-2.52038	0.0117229	0.303903
ENSLBEG00000009548	BH3 interacting domain death agonist [Source:ZFIN;Acc:ZDB-GENE-050419-35]	bida		241.122	-0.56427	0.223953	-2.51959	0.0117492	0.303947
ENSLBEG00000026978	transmembrane anterior posterior transformation protein 1 homolog [Source:NCBI gene;Acc:109994030]	tapt1b		311.605	-0.307267	0.121965	-2.5193	0.0117589	0.303947
ENSLBEG00000021102	stAR-related lipid transfer protein 13-like [Source:NCBI gene;Acc:109996150]	stard13a		34.4364	0.824681	0.327467	2.51837	0.0117901	0.304308
ENSLBEG00000003206	uncharacterized LOC109995170 [Source:NCBI gene;Acc:109995170]	0		43.7006	0.694341	0.275801	2.51755	0.0118175	0.304475
ENSLBEG00000004393	procollagen-lysine,2-oxoglutarate 5-dioxygenase 2-like [Source:NCBI gene;Acc:109999826]	plod2		429.44	0.638797	0.253778	2.51715	0.011831	0.304475
ENSLBEG00000023496	tissue factor pathway inhibitor 2 [Source:NCBI gene;Acc:109982475]	tfpi2		214.24	0.745989	0.296492	2.51605	0.0118679	0.304665
ENSLBEG00000003804	zinc finger protein 706 [Source:NCBI gene;Acc:109994084]	zgc:91910		367.816	0.509899	0.20267	2.5159	0.0118728	0.304665
ENSLBEG00000002430	protein tyrosine phosphatase type IVA 2-like [Source:NCBI gene;Acc:109989924]	ptp4a2b		2613.96	-0.504556	0.200618	-2.51501	0.0119031	0.305001
ENSLBEG00000025584	calponin 3 [Source:NCBI gene;Acc:109987459]	cnn3b		371.579	0.38616	0.153603	2.51401	0.0119367	0.305422
ENSLBEG00000002241	NEDD4 binding protein 2 like 2 [Source:NCBI gene;Acc:109984749]	n4bp2l2		168.073	-0.36928	0.146938	-2.51316	0.0119656	0.305719
ENSLBEG00000028559	junctional adhesion molecule C-like [Source:NCBI gene;Acc:109980789]	jam3b		353.052	0.495237	0.197481	2.50777	0.0121494	0.308664
ENSLBEG00000023043	von Willebrand factor C domain containing 2 [Source:NCBI gene;Acc:109993247]	vwc2		12.2823	-0.912043	0.363697	-2.5077	0.0121521	0.308664
ENSLBEG00000001146	RAB30, member RAS oncogene family [Source:NCBI gene;Acc:109984780]	rab30		98.9949	-0.488203	0.194715	-2.50727	0.0121666	0.308664
ENSLBEG00000008492	lecithin-cholesterol acyltransferase [Source:NCBI gene;Acc:109991845]	lcat		31.0693	0.770058	0.307167	2.50697	0.0121771	0.308664
ENSLBEG00000003997	complement factor H-like [Source:NCBI gene;Acc:109986557]	0		16.307	0.874451	0.348914	2.50621	0.0122034	0.308664
ENSLBEG00000022565	UPF0449 protein C19orf25 homolog [Source:NCBI gene;Acc:110002656]	si:ch73-238c9.1		23.5772	0.828493	0.330597	2.50605	0.0122087	0.308664
ENSLBEG00000001077	endosialin-like [Source:NCBI gene;Acc:109996817]	0		17.0914	0.99672	0.397726	2.50605	0.0122088	0.308664
ENSLBEG00000022935	reticulophagy regulator family member 3 [Source:NCBI gene;Acc:109997848]	retreg3		356.851	0.461615	0.184231	2.50563	0.0122233	0.308664
ENSLBEG00000024073	ankyrin repeat domain 54 [Source:NCBI gene;Acc:110005402]	0		7.40343	-1.92826	0.769806	-2.50487	0.0122498	0.308664
ENSLBEG00000003245	polypeptide N-acetylgalactosaminyltransferase 17 [Source:NCBI gene;Acc:109998590]	galnt17		50.7505	-1.00839	0.402739	-2.50383	0.0122856	0.308664
ENSLBEG00000005411	zinc finger protein 516 [Source:HGNC Symbol;Acc:HGNC:28990]	ZNF516		102.312	-0.56832	0.226996	-2.50366	0.0122916	0.308664
ENSLBEG00000024517	cytoplasmic FMR1 interacting protein 1 [Source:NCBI gene;Acc:109983114]	cyfip1		1211.8	0.282069	0.11268	2.50327	0.0123052	0.308664
ENSLBEG00000003704	ELL-associated factor 2-like [Source:NCBI gene;Acc:110004290]	0		100.864	-1.03901	0.415101	-2.50303	0.0123137	0.308664
ENSLBEG00000008708	0	0		49.5997	-1.3503	0.539536	-2.5027	0.0123249	0.308664
ENSLBEG00000008723	MAP7 domain-containing protein 1-like [Source:NCBI gene;Acc:109983704]	map7d1a		80.5489	0.586899	0.234841	2.49914	0.0124496	0.311345
ENSLBEG00000011231	endoplasmic reticulum lectin 1 [Source:NCBI gene;Acc:109983216]	erlec1		263.578	0.36236	0.145041	2.49833	0.0124779	0.311613
ENSLBEG00000024333	leucine-rich repeat-containing protein 57-like [Source:NCBI gene;Acc:109999678]	lrrc57		51.5266	1.06055	0.424728	2.49702	0.0125241	0.312327
ENSLBEG00000004044	pleckstrin homology domain containing A6 [Source:NCBI gene;Acc:110004295]	plekha6		885.845	0.575069	0.23035	2.4965	0.0125427	0.31235
ENSLBEG00000018047	0	0		27.3642	-0.891156	0.357135	-2.49529	0.0125854	0.312974
ENSLBEG00000025799	leucine-rich repeat-containing protein 32-like [Source:NCBI gene;Acc:109993958]	lrrc32		351.866	0.605932	0.242945	2.49411	0.0126273	0.313376
ENSLBEG00000028292	ectonucleoside triphosphate diphosphohydrolase 6 (putative) [Source:NCBI gene;Acc:109975896]	entpd6		45.3214	0.58285	0.233764	2.49333	0.0126551	0.313376
ENSLBEG00000013040	src substrate protein p85-like [Source:NCBI gene;Acc:109976228]	0		150.525	0.74813	0.300106	2.49288	0.012671	0.313376
ENSLBEG00000015106	ras-interacting protein 1-like [Source:NCBI gene;Acc:109993668]	rasip1		60.7111	0.538382	0.216008	2.49242	0.0126876	0.313376
ENSLBEG00000007560	transcription factor HIVEP3-like [Source:NCBI gene;Acc:109995317]	hivep3b		772.039	-0.311305	0.124904	-2.49235	0.0126901	0.313376
ENSLBEG00000015357	tyrosine-protein kinase yes-like [Source:NCBI gene;Acc:109985019]	yes1		1442.22	-0.274423	0.110128	-2.49185	0.0127079	0.313378
ENSLBEG00000026018	F-box/LRR-repeat protein 3-like [Source:NCBI gene;Acc:109997923]	fbxl3a		26.7756	-0.906907	0.364933	-2.48513	0.0129504	0.318182
ENSLBEG00000025063	0	0		18.1277	-0.760349	0.305961	-2.48512	0.0129508	0.318182
ENSLBEG00000007661	enoyl CoA hydratase domain containing 2 [Source:ZFIN;Acc:ZDB-GENE-030219-147]	echdc2		17.1522	0.883556	0.355765	2.48354	0.0130084	0.318182
ENSLBEG00000023459	integrin subunit beta 4 [Source:NCBI gene;Acc:109988573]	itgb4		813.086	0.355984	0.143339	2.4835	0.0130099	0.318182
ENSLBEG00000019290	high choriolytic enzyme 1-like [Source:NCBI gene;Acc:110005217]	0		15.3028	1.91222	0.770029	2.4833	0.013017	0.318182
ENSLBEG00000014794	uncharacterized LOC109986818 [Source:NCBI gene;Acc:109986818]	si:ch211-183d21.1		117.467	0.719662	0.2898	2.4833	0.013017	0.318182
ENSLBEG00000014558	ERCC excision repair 6, chromatin remodeling factor [Source:NCBI gene;Acc:109990752]	ercc6		239.536	-0.332534	0.133954	-2.48245	0.0130484	0.318182
ENSLBEG00000015350	0	0		22.6055	-2.73952	1.10361	-2.48232	0.0130531	0.318182
ENSLBEG00000010868	0	0		44.618	-2.40321	0.968253	-2.48201	0.0130644	0.318182
ENSLBEG00000007716	Krueppel-like factor 2 [Source:NCBI gene;Acc:110001611]	0		267.011	0.637426	0.256883	2.48139	0.0130873	0.318278
ENSLBEG00000003308	trans-Golgi network integral membrane protein 1-like [Source:NCBI gene;Acc:109977485]	TGOLN1		2325.45	-0.423679	0.170775	-2.48092	0.0131043	0.318278
ENSLBEG00000014798	0	0		201.954	-1.50925	0.608912	-2.4786	0.01319	0.319238
ENSLBEG00000009847	Fli-1 proto-oncogene, ETS transcription factor [Source:NCBI gene;Acc:109995366]	fli1a		422.988	0.375406	0.151481	2.47824	0.0132031	0.319238
ENSLBEG00000009104	flotillin-2 [Source:NCBI gene;Acc:109991249]	flot2b		406.58	-0.389363	0.157129	-2.47798	0.0132128	0.319238
ENSLBEG00000010381	cytochrome P450 2J6-like [Source:NCBI gene;Acc:109977741]	0		1782.57	0.641169	0.258755	2.4779	0.013216	0.319238
ENSLBEG00000023651	solute carrier family 22 member 2-like [Source:NCBI gene;Acc:109986398]	slc22a2		27.9087	1.43463	0.579476	2.47574	0.013296	0.320734
ENSLBEG00000008861	0	0		408.906	-0.826505	0.333927	-2.47511	0.0133197	0.320868
ENSLBEG00000015318	clusterin-like protein 1 [Source:NCBI gene;Acc:109985036]	clul1		20.8467	1.21213	0.489954	2.47396	0.0133625	0.321461
ENSLBEG00000011196	cadherin 16 [Source:NCBI gene;Acc:109998133]	cdh16		44.9284	0.942904	0.381228	2.47333	0.013386	0.32159
ENSLBEG00000020119	nuclear apoptosis inducing factor 1 [Source:NCBI gene;Acc:109988559]	naif1		10.0126	-0.957693	0.387338	-2.4725	0.0134173	0.321906
ENSLBEG00000007229	0	0		39.6989	1.19508	0.483624	2.47109	0.0134703	0.32274
ENSLBEG00000009537	transcription factor 7 like 2 [Source:NCBI gene;Acc:109997573]	tcf7l2		1753.97	-0.402418	0.162935	-2.46981	0.0135185	0.322976
ENSLBEG00000014215	macrophage mannose receptor 1-like [Source:NCBI gene;Acc:109985026]	mrc1b		1173.45	0.701571	0.284111	2.46935	0.0135358	0.322976
ENSLBEG00000020882	MAX dimerization protein 4 [Source:NCBI gene;Acc:109994915]	mxd4		2226.05	-0.555133	0.224859	-2.4688	0.0135566	0.322976
ENSLBEG00000011761	polycomb group ring finger 3 [Source:NCBI gene;Acc:109986723]	PCGF3		14.3662	-0.904621	0.366427	-2.46876	0.0135581	0.322976
ENSLBEG00000021452	dnaJ homolog subfamily C member 7-like [Source:NCBI gene;Acc:110002630]	DNAJC7		2035.07	-0.282475	0.114436	-2.46841	0.0135713	0.322976
ENSLBEG00000025683	0	0		69.782	-1.60234	0.649369	-2.46754	0.0136046	0.323156
ENSLBEG00000026053	phospholipase D4-like [Source:NCBI gene;Acc:109981266]	PLD4		430.58	-0.436226	0.176806	-2.46725	0.0136154	0.323156
ENSLBEG00000010590	E3 ubiquitin-protein ligase DTX3L-like [Source:NCBI gene;Acc:109982072]	si:dkey-3h3.3		151.107	-0.36911	0.149733	-2.46513	0.0136964	0.324644
ENSLBEG00000025333	myeloid zinc finger 1-like [Source:NCBI gene;Acc:110000863]	0		1010.7	-0.302128	0.122596	-2.46441	0.0137237	0.324856
ENSLBEG00000002544	cytochrome c [Source:NCBI gene;Acc:109992886]	0		233.765	-0.788909	0.320214	-2.46369	0.0137514	0.325075
ENSLBEG00000000856	nucleobindin-2-like [Source:NCBI gene;Acc:110000353]	nucb1		1061.45	0.351639	0.142833	2.46189	0.0138206	0.325757
ENSLBEG00000028224	dishevelled segment polarity protein 2 [Source:NCBI gene;Acc:109980751]	dvl2		107.23	0.43611	0.177327	2.45936	0.0139186	0.325757
ENSLBEG00000002535	transcription factor 21 [Source:NCBI gene;Acc:109987714]	tcf21		167.977	0.641553	0.260887	2.45912	0.0139277	0.325757
ENSLBEG00000020032	serine hydrolase-like protein [Source:NCBI gene;Acc:109994361]	serhl		110.652	-0.39976	0.162568	-2.45904	0.0139308	0.325757
ENSLBEG00000014612	ADP ribosylation factor like GTPase 13B [Source:NCBI gene;Acc:110000004]	arl13b		309	0.251671	0.102368	2.4585	0.0139517	0.325757
ENSLBEG00000005136	ras-related protein Rab-40B-like [Source:NCBI gene;Acc:110004327]	rab40b		32.7316	0.631928	0.257053	2.45836	0.0139573	0.325757
ENSLBEG00000028531	slit homolog 1 protein-like [Source:NCBI gene;Acc:109988217]	slit1b		6.84852	1.54701	0.629383	2.45798	0.0139721	0.325757
ENSLBEG00000008718	0	0		13.3526	-1.61709	0.657909	-2.45792	0.0139745	0.325757
ENSLBEG00000014351	phosphatidylinositol transfer protein beta isoform-like [Source:NCBI gene;Acc:109998198]	pitpnb		166.723	-0.641743	0.261208	-2.45683	0.0140169	0.325757
ENSLBEG00000015447	disintegrin and metalloproteinase domain-containing protein 10-like [Source:NCBI gene;Acc:110003142]	adam10b		1600.12	-0.300084	0.12215	-2.45668	0.0140226	0.325757
ENSLBEG00000012262	disabled homolog 1-like [Source:NCBI gene;Acc:109997059]	dab1b		7.1338	1.94237	0.790692	2.45654	0.0140281	0.325757
ENSLBEG00000002583	antigen peptide transporter 1-like [Source:NCBI gene;Acc:109988836]	tap1		1340.25	-0.459116	0.186901	-2.45647	0.0140309	0.325757
ENSLBEG00000023901	TGF-beta receptor type-2-like [Source:NCBI gene;Acc:109985151]	si:dkey-101k6.5		72.9186	0.517299	0.210655	2.45567	0.0140623	0.325757
ENSLBEG00000008425	delta-like protein D [Source:NCBI gene;Acc:109983660]	0		12.0235	1.15754	0.471384	2.45563	0.0140638	0.325757
ENSLBEG00000000346	KN motif and ankyrin repeat domain-containing protein 3-like [Source:NCBI gene;Acc:110001277]	kank3		155.094	0.536653	0.218548	2.45554	0.0140672	0.325757
ENSLBEG00000023092	nucleolysin TIA-1-like [Source:NCBI gene;Acc:109998923]	tia1l		920.084	-0.196392	0.0799851	-2.45536	0.0140745	0.325757
ENSLBEG00000027636	melanophilin [Source:NCBI gene;Acc:109983448]	mlphb		288.852	0.551812	0.224917	2.4534	0.0141511	0.326205
ENSLBEG00000026469	ribosomal protein lateral stalk subunit P1 [Source:NCBI gene;Acc:109984528]	rplp1		15444.4	0.365262	0.148889	2.45325	0.0141571	0.326205
ENSLBEG00000008386	protein-tyrosine sulfotransferase 1 [Source:NCBI gene;Acc:109995348]	tpst1		250.814	0.356977	0.145546	2.45268	0.0141795	0.326205
ENSLBEG00000012369	membrane cofactor protein-like [Source:NCBI gene;Acc:109977022]	0		1723.52	-0.436952	0.178183	-2.45226	0.0141962	0.326205
ENSLBEG00000003808	uncharacterized LOC109997979 [Source:NCBI gene;Acc:109997979]	0		81.6254	0.749342	0.305597	2.45206	0.0142041	0.326205
ENSLBEG00000014091	actin-binding LIM protein 1-like [Source:NCBI gene;Acc:109986755]	0		155.95	0.532274	0.217099	2.45176	0.014216	0.326205
ENSLBEG00000007976	uncharacterized LOC109991129 [Source:NCBI gene;Acc:109991129]	zgc:112980		247.246	-0.301824	0.123122	-2.45143	0.0142289	0.326205
ENSLBEG00000024104	0	0		42.3842	-1.74803	0.713155	-2.45112	0.0142413	0.326205
ENSLBEG00000027568	caudal type homeobox 1 [Source:NCBI gene;Acc:109992614]	cdx1a		439.265	-0.704584	0.287562	-2.4502	0.0142778	0.326618
ENSLBEG00000020163	GTPase IMAP family member 7-like [Source:NCBI gene;Acc:110001217]	0		456.229	-1.92036	0.783919	-2.44969	0.0142978	0.326653
ENSLBEG00000005283	family with sequence similarity 192 member A [Source:NCBI gene;Acc:109988901]	fam192a		290.091	-0.203169	0.083044	-2.44653	0.014424	0.32888
ENSLBEG00000021190	isocitrate dehydrogenase (NADP(+)) 1, cytosolic [Source:NCBI gene;Acc:109986968]	idh1		2228.41	0.462789	0.189178	2.44632	0.0144324	0.32888
ENSLBEG00000023036	major facilitator superfamily domain containing 1 [Source:NCBI gene;Acc:109985760]	mfsd1		580.11	0.2797	0.114364	2.44571	0.0144569	0.329015
ENSLBEG00000002352	leukemia inhibitory factor receptor-like [Source:NCBI gene;Acc:110001082]	0		290.509	-0.562333	0.230026	-2.44465	0.0144992	0.32939
ENSLBEG00000025102	0	0		11.9268	1.80691	0.739215	2.44437	0.0145106	0.32939
ENSLBEG00000028687	ribosomal protein L39 [Source:NCBI gene;Acc:109992722]	rpl39		15509.6	0.354648	0.145182	2.44279	0.0145743	0.329885
ENSLBEG00000027686	chromobox homolog 2 (Drosophila Pc class) [Source:ZFIN;Acc:ZDB-GENE-030131-5502]	cbx2		75.0345	-0.582787	0.238593	-2.4426	0.0145819	0.329885
ENSLBEG00000008035	protein phosphatase 1D-like [Source:NCBI gene;Acc:109981468]	0		142.722	-0.355976	0.145761	-2.44219	0.0145985	0.329885
ENSLBEG00000025881	myotubularin related protein 10 [Source:NCBI gene;Acc:109975083]	mtmr10		1470.94	-0.305677	0.125184	-2.44181	0.0146138	0.329885
ENSLBEG00000020943	adhesion G protein-coupled receptor G3-like [Source:NCBI gene;Acc:109982338]	adgrg1		1494.38	-0.278185	0.113945	-2.44139	0.0146309	0.329885
ENSLBEG00000026557	sodium/potassium/calcium exchanger 3-like [Source:NCBI gene;Acc:109996789]	slc24a3		58.0148	-0.663929	0.272026	-2.44068	0.0146596	0.329885
ENSLBEG00000028642	0	0		15.3578	1.19297	0.488811	2.44055	0.0146649	0.329885
ENSLBEG00000020932	tubulin folding cofactor D [Source:NCBI gene;Acc:110000198]	tbcd		248.795	0.243877	0.0999438	2.44014	0.0146814	0.329885
ENSLBEG00000022707	0	0		51.7162	0.769641	0.315486	2.43954	0.0147059	0.330015
ENSLBEG00000028517	solute carrier family 2 member 10 [Source:NCBI gene;Acc:109988163]	slc2a10		36.2136	0.583613	0.239438	2.43743	0.014792	0.331
ENSLBEG00000025340	transmembrane and tetratricopeptide repeat containing 1 [Source:ZFIN;Acc:ZDB-GENE-070705-219]	tmtc1		8.54132	1.11458	0.45728	2.43741	0.0147928	0.331
ENSLBEG00000025546	phosphatidylinositol glycan anchor biosynthesis class P [Source:NCBI gene;Acc:109987316]	pigp		97.9968	-0.406707	0.166882	-2.43709	0.0148058	0.331
ENSLBEG00000010376	0	0		44.3955	0.655171	0.268892	2.43656	0.0148278	0.331073
ENSLBEG00000009330	0	0		58.4115	-2.03005	0.834298	-2.43325	0.014964	0.33363
ENSLBEG00000000074	V-set and transmembrane domain-containing protein 4-like [Source:NCBI gene;Acc:109992251]	vstm4b		15.3943	0.837416	0.34421	2.43286	0.01498	0.33363
ENSLBEG00000009168	V-type proton ATPase 116 kDa subunit a-like [Source:NCBI gene;Acc:109996948]	atp6v0a1b		34.3011	0.70022	0.287926	2.43194	0.0150181	0.334058
ENSLBEG00000027193	uncharacterized LOC109994563 [Source:NCBI gene;Acc:109994563]	0		181.102	-0.697207	0.286778	-2.43117	0.0150501	0.33435
ENSLBEG00000012444	T-box transcription factor TBX1-like [Source:NCBI gene;Acc:109991924]	TBX1		29.8642	-1.82273	0.750027	-2.43022	0.0150899	0.334813
ENSLBEG00000018295	0	0		7.75881	1.58147	0.650894	2.42968	0.0151121	0.334887
ENSLBEG00000003067	GTP binding protein overexpressed in skeletal muscle [Source:NCBI gene;Acc:109997436]	gem		48.7522	0.882357	0.363319	2.4286	0.0151573	0.334998
ENSLBEG00000028709	SAM and SH3 domain containing 3 [Source:NCBI gene;Acc:109992687]	sash3		1008.19	-0.399747	0.164637	-2.42805	0.0151801	0.334998
ENSLBEG00000026178	0	0		119.158	0.714252	0.294211	2.42769	0.0151954	0.334998
ENSLBEG00000005684	MRG domain binding protein [Source:NCBI gene;Acc:109976843]	mrgbp		1003.88	-0.215256	0.088679	-2.42736	0.0152092	0.334998
ENSLBEG00000018370	inter-alpha-trypsin inhibitor heavy chain H3-like [Source:NCBI gene;Acc:109990282]	0		36.4071	2.35757	0.971271	2.4273	0.0152117	0.334998
ENSLBEG00000010692	general transcription factor IIE subunit 1-like [Source:NCBI gene;Acc:110004949]	gtf2e1		115.469	-0.392124	0.161603	-2.42646	0.0152468	0.335353
ENSLBEG00000015683	0	0		64.7834	-0.846993	0.349165	-2.42577	0.0152761	0.335403
ENSLBEG00000013259	proline rich transmembrane protein 4 [Source:NCBI gene;Acc:109997887]	si:dkey-31f5.11		6.77607	1.32718	0.547176	2.42551	0.0152869	0.335403
ENSLBEG00000023787	HEPACAM family member 2 [Source:NCBI gene;Acc:109982505]	hepacam2		227.712	0.37382	0.15417	2.42472	0.0153204	0.335466
ENSLBEG00000013942	secretory carrier-associated membrane protein 5 [Source:NCBI gene;Acc:110004043]	scamp5a		62.725	0.602876	0.248655	2.42454	0.0153277	0.335466
ENSLBEG00000019076	si:ch73-233k15.2 [Source:ZFIN;Acc:ZDB-GENE-120215-22]	si:ch73-233k15.2		67.3416	-0.700931	0.289154	-2.42408	0.0153473	0.335481
ENSLBEG00000004280	bradykinin receptor B2 [Source:HGNC Symbol;Acc:HGNC:1030]	BDKRB2		23.3325	1.13718	0.469359	2.42283	0.0154002	0.33568
ENSLBEG00000021467	0	0		42.4382	0.805209	0.332346	2.4228	0.0154012	0.33568
ENSLBEG00000014253	focadhesin [Source:NCBI gene;Acc:109991318]	focad		58.9147	0.575315	0.237504	2.42234	0.015421	0.33568
ENSLBEG00000007669	elongation of very long chain fatty acids protein 4-like [Source:NCBI gene;Acc:109990094]	elovl4b		74.7822	-0.698906	0.288595	-2.42175	0.0154458	0.33568
ENSLBEG00000002082	Wilms tumor 1 [Source:NCBI gene;Acc:109994504]	wt1b		62.4783	0.84367	0.34839	2.42163	0.0154512	0.33568
ENSLBEG00000018470	endothelin receptor type A [Source:NCBI gene;Acc:109980543]	ednraa		215.276	0.579728	0.239568	2.41989	0.0155251	0.336124
ENSLBEG00000027652	RNA polymerase II subunit A [Source:NCBI gene;Acc:109980738]	polr2a		2226.79	-0.218603	0.0903458	-2.41963	0.0155364	0.336124
ENSLBEG00000015105	serine/threonine-protein kinase B-raf-like [Source:NCBI gene;Acc:109976292]	BRAF		152.18	-0.441562	0.182499	-2.41954	0.0155403	0.336124
ENSLBEG00000002678	0	0		63.4861	-1.03666	0.428485	-2.41937	0.0155476	0.336124
ENSLBEG00000000814	retinol dehydrogenase 11-like [Source:NCBI gene;Acc:109980819]	zgc:64106		1034.18	0.312176	0.129068	2.41869	0.0155763	0.336334
ENSLBEG00000025017	bromodomain containing 9 [Source:NCBI gene;Acc:109994962]	brd9		235.17	-0.247986	0.102603	-2.41695	0.0156513	0.337225
ENSLBEG00000014850	protein NLRC3-like [Source:NCBI gene;Acc:109986794]	nlrc3		903.574	-0.464189	0.192079	-2.41665	0.015664	0.337225
ENSLBEG00000012491	tumor necrosis factor receptor superfamily member 5-like [Source:NCBI gene;Acc:109996990]	cd40		918.803	-0.45516	0.188404	-2.41587	0.0156977	0.337225
ENSLBEG00000021870	phospholipase C like 1 (inactive) [Source:NCBI gene;Acc:109986936]	plcl1		46.5929	-0.766651	0.317355	-2.41575	0.015703	0.337225
ENSLBEG00000010157	0	0		14.9704	-2.30411	0.953937	-2.41536	0.0157195	0.337225
ENSLBEG00000023274	NHS actin remodeling regulator [Source:NCBI gene;Acc:109982334]	nhsa		583.054	-0.457571	0.189465	-2.41507	0.0157321	0.337225
ENSLBEG00000026505	0	0		13.3621	1.20466	0.498938	2.41445	0.015759	0.337225
ENSLBEG00000011180	protein Wiz-like [Source:NCBI gene;Acc:109989590]	si:dkey-217d24.6		83.6429	0.408975	0.169419	2.41399	0.015779	0.337225
ENSLBEG00000025272	aldehyde dehydrogenase 1 family member A2 [Source:NCBI gene;Acc:110006199]	aldh1a2		2872.66	0.254466	0.105436	2.41348	0.0158012	0.337225
ENSLBEG00000022471	ribosomal protein S18 [Source:NCBI gene;Acc:110000220]	rps18		16792.5	0.253272	0.104948	2.41332	0.015808	0.337225
ENSLBEG00000014676	0	0		6.93128	1.35556	0.561839	2.41273	0.0158337	0.337366
ENSLBEG00000010508	uncharacterized LOC109995399 [Source:NCBI gene;Acc:109995399]	0		15.1697	1.0914	0.452606	2.41137	0.0158928	0.337906
ENSLBEG00000026293	cytochrome P450, family 1, subfamily C, polypeptide 2 [Source:ZFIN;Acc:ZDB-GENE-050705-1]	cyp1c2		40.1787	0.866282	0.359264	2.41127	0.0158972	0.337906
ENSLBEG00000019061	F-box and leucine rich repeat protein 17 [Source:NCBI gene;Acc:109981581]	fbxl17		85.8542	-0.399654	0.165795	-2.41053	0.0159292	0.33818
ENSLBEG00000008651	transmembrane protein 120A [Source:NCBI gene;Acc:109988926]	tmem120a		124.801	0.342945	0.142318	2.4097	0.0159657	0.338491
ENSLBEG00000004282	ribosomal protein L37a [Source:NCBI gene;Acc:109996304]	RPL37A		13166.1	0.252856	0.104949	2.40933	0.0159821	0.338491
ENSLBEG00000000027	cAMP-specific 3',5'-cyclic phosphodiesterase 4D-like [Source:NCBI gene;Acc:110000270]	0		130.623	-0.53284	0.221317	-2.40758	0.0160586	0.339654
ENSLBEG00000018615	anoctamin-9-like [Source:NCBI gene;Acc:109989629]	ano9b		2066.74	-0.309313	0.128518	-2.40677	0.0160941	0.339654
ENSLBEG00000007426	0	0		163.675	1.74211	0.723838	2.40677	0.0160945	0.339654
ENSLBEG00000018813	somatostatin receptor 1a [Source:ZFIN;Acc:ZDB-GENE-090429-1]	sstr1a		6.2271	1.60511	0.667863	2.40335	0.0162456	0.342434
ENSLBEG00000026114	lymphocyte antigen 75-like [Source:NCBI gene;Acc:109987025]	ly75		904.706	-0.191071	0.0795206	-2.40278	0.016271	0.342561
ENSLBEG00000016143	target of Nesh-SH3-like [Source:NCBI gene;Acc:110003782]	ABI3BP		53.4331	-0.633143	0.263557	-2.4023	0.0162923	0.342602
ENSLBEG00000028022	E3 ubiquitin-protein ligase rnf213-alpha-like [Source:NCBI gene;Acc:110000696]	0		1287.82	-0.280219	0.116674	-2.40172	0.0163181	0.342738
ENSLBEG00000020628	protein FAM110B-like [Source:NCBI gene;Acc:109985076]	FAM110A		67.2021	0.585768	0.244049	2.4002	0.0163859	0.343266
ENSLBEG00000028133	protein phosphatase 2 regulatory subunit B'delta [Source:NCBI gene;Acc:109976876]	ppp2r5d		49.5431	-0.59243	0.246911	-2.39937	0.0164234	0.343266
ENSLBEG00000013463	RAB15, member RAS oncogene family [Source:NCBI gene;Acc:109978741]	rab15		7.41941	1.4835	0.61832	2.39924	0.0164291	0.343266
ENSLBEG00000013658	protein kinase C iota [Source:NCBI gene;Acc:109985010]	prkci		442.764	-0.346878	0.144616	-2.39862	0.0164569	0.343266
ENSLBEG00000014335	0	0		50.2344	-3.39611	1.41587	-2.3986	0.0164581	0.343266
ENSLBEG00000010510	MAP7 domain containing 3 [Source:NCBI gene;Acc:109985411]	map7d3		776.335	-0.310759	0.129561	-2.39856	0.0164596	0.343266
ENSLBEG00000019503	ral guanine nucleotide dissociation stimulator like 1 [Source:NCBI gene;Acc:109982755]	rgl1		929.733	0.28063	0.117023	2.39808	0.0164815	0.343319
ENSLBEG00000010193	ribulose-phosphate 3-epimerase-like [Source:NCBI gene;Acc:110004535]	rpe		183.736	0.596766	0.249068	2.39599	0.0165754	0.344402
ENSLBEG00000008436	RNA binding motif protein 47 [Source:NCBI gene;Acc:109994141]	rbm47		12572.3	-0.301034	0.125658	-2.39566	0.0165905	0.344402
ENSLBEG00000004107	potassium voltage-gated channel subfamily J member 10 [Source:NCBI gene;Acc:109997468]	KCNJ10		71.8372	-0.855121	0.35696	-2.39557	0.0165947	0.344402
ENSLBEG00000008240	0	0		1175.31	-0.552655	0.230734	-2.3952	0.0166113	0.344402
ENSLBEG00000016666	zinc finger protein 341 [Source:NCBI gene;Acc:109985588]	znf341		142.332	-0.446447	0.186456	-2.39438	0.0166483	0.344542
ENSLBEG00000022603	DELTA-stichotoxin-Hcr4a-like [Source:NCBI gene;Acc:109997854]	apnl		48.0615	0.901234	0.376471	2.3939	0.0166701	0.344542
ENSLBEG00000024827	0	0		335.544	-0.629361	0.262988	-2.39312	0.0167058	0.344542
ENSLBEG00000015525	F-box and WD repeat domain containing 4 [Source:NCBI gene;Acc:109987227]	fbxw4		137.308	-0.347043	0.145031	-2.39288	0.0167166	0.344542
ENSLBEG00000003461	alpha-N-acetylgalactosaminidase-like [Source:NCBI gene;Acc:109978867]	0		50.4299	0.828087	0.346138	2.39236	0.0167403	0.344542
ENSLBEG00000019416	0	0		1385.78	-0.630929	0.263727	-2.39236	0.0167406	0.344542
ENSLBEG00000009161	colony stimulating factor 3 receptor [Source:NCBI gene;Acc:109983684]	CSF3R		427.561	0.73891	0.308942	2.39174	0.0167686	0.344542
ENSLBEG00000024612	B-cell lymphoma/leukemia 11A-like [Source:NCBI gene;Acc:109993916]	bcl11aa		111.806	-0.699629	0.292567	-2.39134	0.0167868	0.344542
ENSLBEG00000021205	0	0		321.975	-0.725925	0.303615	-2.39094	0.0168054	0.344542
ENSLBEG00000011183	0	0		45.4121	2.13519	0.893215	2.39046	0.0168273	0.344542
ENSLBEG00000019577	T-box 3 [Source:NCBI gene;Acc:109981231]	tbx3a		289.833	-0.477015	0.199566	-2.39026	0.0168363	0.344542
ENSLBEG00000026890	angiomotin like 2 [Source:NCBI gene;Acc:109983476]	amotl2		176.449	0.76185	0.318779	2.3899	0.0168528	0.344542
ENSLBEG00000022595	0	0		14.6435	1.59714	0.668399	2.38951	0.016871	0.344542
ENSLBEG00000016812	3-hydroxyacyl-CoA dehydratase 1 [Source:NCBI gene;Acc:109994254]	hacd1		14.4678	1.24602	0.521607	2.38882	0.0169026	0.344789
ENSLBEG00000013670	sperm flagellar 2 [Source:ZFIN;Acc:ZDB-GENE-060526-47]	spef2		24.1443	0.701888	0.294043	2.38703	0.0169852	0.346077
ENSLBEG00000006184	WAS/WASL-interacting protein family member 3-like [Source:NCBI gene;Acc:109994616]	sb:cb649		28.1707	0.937125	0.392932	2.38496	0.0170812	0.347632
ENSLBEG00000021998	Ral GTPase activating protein, alpha subunit 1 (catalytic) [Source:ZFIN;Acc:ZDB-GENE-080806-1]	ralgapa1		374.278	-0.497068	0.208462	-2.38446	0.0171044	0.347705
ENSLBEG00000021141	0	0		40.5745	3.29987	1.38458	2.38331	0.0171578	0.347968
ENSLBEG00000019730	0	0		148.804	-0.583351	0.244799	-2.38298	0.0171731	0.347968
ENSLBEG00000003669	uncharacterized LOC109980080 [Source:NCBI gene;Acc:109980080]	0		99.5724	-1.07891	0.452768	-2.38291	0.0171763	0.347968
ENSLBEG00000025909	kelch repeat and BTB domain containing 8 [Source:NCBI gene;Acc:109983410]	kbtbd8		325.298	-0.248976	0.104514	-2.38222	0.0172085	0.348131
ENSLBEG00000013369	CXADR, Ig-like cell adhesion molecule [Source:NCBI gene;Acc:109982126]	cxadr		3488.84	-0.448701	0.188396	-2.38169	0.0172334	0.348131
ENSLBEG00000021019	cap methyltransferase 1 [Source:NCBI gene;Acc:109983292]	cmtr1		195.189	0.395184	0.165941	2.38148	0.0172434	0.348131
ENSLBEG00000016601	immunoglobulin superfamily containing leucine rich repeat 2 [Source:NCBI gene;Acc:109982177]	islr2		535.283	0.648778	0.272658	2.37946	0.0173381	0.349227
ENSLBEG00000007755	SEC14-like protein 1 [Source:NCBI gene;Acc:109994113]	SEC14L1		184.35	0.454207	0.190974	2.37837	0.0173892	0.349227
ENSLBEG00000020488	pumilio RNA binding family member 2 [Source:NCBI gene;Acc:109989647]	pum2		1772.81	-0.22971	0.0965983	-2.37799	0.0174073	0.349227
ENSLBEG00000026077	protein kinase D2 [Source:NCBI gene;Acc:109988004]	prkd2		588.528	-0.250914	0.105522	-2.37784	0.0174145	0.349227
ENSLBEG00000020523	Cbl proto-oncogene [Source:NCBI gene;Acc:109999255]	cbl		1093.19	-0.260774	0.109676	-2.37768	0.0174219	0.349227
ENSLBEG00000002665	fatty acid-binding protein, heart-like [Source:NCBI gene;Acc:109982478]	fabp3		238.406	0.738367	0.310565	2.3775	0.0174306	0.349227
ENSLBEG00000022890	0	0		62.9592	-0.491876	0.206928	-2.37704	0.0174524	0.349227
ENSLBEG00000009750	pancreatic progenitor cell differentiation and proliferation factor B-like [Source:NCBI gene;Acc:110000525]	ppdpfb		829.771	0.707071	0.297467	2.37697	0.0174554	0.349227
ENSLBEG00000016552	inositol 1,4,5-trisphosphate receptor type 2-like [Source:NCBI gene;Acc:110003801]	itpr2		134.223	-0.489442	0.206062	-2.37522	0.0175387	0.350497
ENSLBEG00000028181	protein FAM60A-like [Source:NCBI gene;Acc:109984581]	0		23.4034	-0.794596	0.334621	-2.37461	0.0175673	0.350673
ENSLBEG00000002092	heart development protein with EGF like domains 1 [Source:NCBI gene;Acc:109985389]	heg1		242.07	0.495527	0.208762	2.37364	0.0176136	0.351202
ENSLBEG00000026982	major facilitator superfamily domain-containing protein 12-like [Source:NCBI gene;Acc:110000065]	0		64.8039	0.784483	0.330802	2.37146	0.017718	0.352886
ENSLBEG00000020351	neuromedin U [Source:NCBI gene;Acc:109991497]	NMU		28.699	1.01917	0.43003	2.37	0.0177879	0.353449
ENSLBEG00000027321	DENN domain containing 1B [Source:NCBI gene;Acc:110000287]	dennd1b		122.186	-0.572215	0.241454	-2.36987	0.0177943	0.353449
ENSLBEG00000026342	catenin delta-1-like [Source:NCBI gene;Acc:109989818]	ctnnd1		5013.83	-0.217867	0.0919414	-2.36962	0.0178062	0.353449
ENSLBEG00000012022	transcription factor Sox-18B-like [Source:NCBI gene;Acc:110000569]	0		106.127	0.744849	0.314534	2.3681	0.0178796	0.354344
ENSLBEG00000027008	0	0		26.0246	0.682474	0.288349	2.36683	0.0179411	0.354344
ENSLBEG00000019129	0	0		1425.85	-0.252356	0.106628	-2.36669	0.0179479	0.354344
ENSLBEG00000018461	rho guanine nucleotide exchange factor 19-like [Source:NCBI gene;Acc:109985103]	arhgef19		757.126	-0.512451	0.216603	-2.36585	0.0179886	0.354344
ENSLBEG00000002184	SMG6, nonsense mediated mRNA decay factor [Source:NCBI gene;Acc:109991729]	smg6		589.982	-0.302141	0.127719	-2.36566	0.0179977	0.354344
ENSLBEG00000011945	0	0		8.74964	-2.18356	0.92307	-2.36554	0.018004	0.354344
ENSLBEG00000016023	poly [ADP-ribose] polymerase 14-like [Source:NCBI gene;Acc:109999479]	0		759.283	-0.389693	0.16475	-2.36536	0.0180128	0.354344
ENSLBEG00000002443	insulin like growth factor binding protein 6 [Source:NCBI gene;Acc:109999769]	igfbp6b		164.952	0.615406	0.260207	2.36506	0.018027	0.354344
ENSLBEG00000003018	breakpoint cluster region protein-like [Source:NCBI gene;Acc:109987111]	bcr		53.9756	0.519807	0.219794	2.36497	0.0180314	0.354344
ENSLBEG00000022995	solute carrier family 4 member 1 adaptor protein [Source:NCBI gene;Acc:109989716]	slc4a1ap		447.236	0.346808	0.146705	2.36399	0.0180794	0.354646
ENSLBEG00000007690	BOLA class I histocompatibility antigen, alpha chain BL3-6-like [Source:NCBI gene;Acc:109976888]	0		4856.72	-0.645993	0.273282	-2.36384	0.0180868	0.354646
ENSLBEG00000025905	complement factor properdin [Source:NCBI gene;Acc:109989305]	CFP		168.739	0.806088	0.341186	2.3626	0.018147	0.355101
ENSLBEG00000005108	flavin adenine dinucleotide synthetase 1 [Source:NCBI gene;Acc:109990042]	flad1		161.253	0.35301	0.149434	2.36232	0.018161	0.355101
ENSLBEG00000006623	RNA polymerase II associated protein 2 [Source:NCBI gene;Acc:109995603]	rpap2		99.3405	0.416854	0.176498	2.3618	0.0181866	0.355101
ENSLBEG00000025745	prickle planar cell polarity protein 2 [Source:NCBI gene;Acc:109983402]	prickle2b		88.3519	0.599989	0.254084	2.36138	0.018207	0.355101
ENSLBEG00000017194	tripartite motif-containing protein 16-like [Source:NCBI gene;Acc:109977638]	0		60.2825	-0.617032	0.261309	-2.36131	0.0182103	0.355101
ENSLBEG00000022158	protein phosphatase 1H-like [Source:NCBI gene;Acc:110005218]	ppm1h		47.8734	-0.555244	0.235321	-2.35952	0.0182988	0.356435
ENSLBEG00000027374	MBT domain-containing protein 1-like [Source:NCBI gene;Acc:109987741]	mbtd1		82.4407	-0.683381	0.289755	-2.35848	0.0183499	0.357036
ENSLBEG00000011176	laminin subunit alpha 4 [Source:NCBI gene;Acc:109986115]	lama4		517.769	0.399071	0.169425	2.35544	0.0185007	0.359577
ENSLBEG00000022046	uridine monophosphate synthetase [Source:NCBI gene;Acc:109987368]	umps		121.851	0.413361	0.175563	2.35448	0.0185484	0.360045
ENSLBEG00000021448	olfactory receptor 14A16-like [Source:NCBI gene;Acc:109978677]	0		9.45445	1.0788	0.458258	2.35414	0.0185655	0.360045
ENSLBEG00000025325	PHD finger protein 12 [Source:NCBI gene;Acc:109989292]	phf12b		216.759	-0.287679	0.122263	-2.35296	0.0186246	0.360733
ENSLBEG00000015100	pleckstrin homology domain containing, family G (with RhoGef domain) member 4 [Source:ZFIN;Acc:ZDB-GENE-030131-4824]	plekhg4		20.1742	0.942045	0.400424	2.35262	0.0186418	0.360733
ENSLBEG00000015168	Ral GTPase activating protein non-catalytic beta subunit [Source:NCBI gene;Acc:109985575]	ralgapb		1074.44	-0.181244	0.0770579	-2.35205	0.01867	0.360886
ENSLBEG00000026549	transcriptional repressor GATA binding 1 [Source:NCBI gene;Acc:109984535]	trps1		267.444	-0.375989	0.159962	-2.35049	0.0187489	0.362005
ENSLBEG00000020326	hedgehog acyltransferase [Source:NCBI gene;Acc:109998326]	hhat		11.8214	0.913565	0.388736	2.35009	0.0187688	0.362005
ENSLBEG00000019317	methyltransferase like 6 [Source:NCBI gene;Acc:110001191]	mettl6		41.0049	-0.454481	0.193472	-2.34908	0.0188199	0.362584
ENSLBEG00000028778	transcriptional enhancer factor TEF-1-like [Source:NCBI gene;Acc:109992769]	tead1a		97.6497	0.373298	0.158939	2.34869	0.0188398	0.362584
ENSLBEG00000012048	ATP-dependent RNA helicase DHX8-like [Source:NCBI gene;Acc:109992398]	dhx8		643.422	0.267899	0.114088	2.34819	0.0188647	0.36267
ENSLBEG00000022654	PERP, TP53 apoptosis effector [Source:NCBI gene;Acc:109996220]	perp		4533.83	-0.26484	0.112897	-2.34586	0.0189834	0.364555
ENSLBEG00000005663	P2X purinoceptor 1-like [Source:NCBI gene;Acc:109996352]	p2rx1		156.648	0.505089	0.21548	2.34401	0.0190775	0.365455
ENSLBEG00000010572	myelin-associated glycoprotein-like [Source:NCBI gene;Acc:109986667]	0		21.2412	-1.22391	0.522207	-2.34373	0.0190922	0.365455
ENSLBEG00000010849	mitogen-activated protein kinase 14A [Source:NCBI gene;Acc:109984231]	MAPK14		434.445	-0.258059	0.110117	-2.34349	0.0191042	0.365455
ENSLBEG00000023495	beta-1,3-N-acetylglucosaminyltransferase lunatic fringe-like [Source:NCBI gene;Acc:109997861]	lfng		132.335	0.482757	0.206014	2.34332	0.0191128	0.365455
ENSLBEG00000024987	tubulin alpha-1A chain [Source:NCBI gene;Acc:109996241]	tuba1a		32.921	0.712064	0.304071	2.34177	0.0191925	0.366405
ENSLBEG00000006966	0	0		181.552	0.975238	0.416531	2.34133	0.0192151	0.366405
ENSLBEG00000005316	protein phosphatase 2 regulatory subunit B'gamma [Source:NCBI gene;Acc:109990533]	PPP2R5C		1102.32	-0.216182	0.0923402	-2.34115	0.0192246	0.366405
ENSLBEG00000019389	ADAM metallopeptidase domain 19a [Source:ZFIN;Acc:ZDB-GENE-070813-1]	adam19a		104.523	0.712925	0.304588	2.34062	0.0192516	0.366526
ENSLBEG00000001876	arrestin red cell-like [Source:NCBI gene;Acc:110000933]	ARRB2		181.75	0.451235	0.192934	2.33881	0.0193454	0.367478
ENSLBEG00000025164	growth arrest specific 2 like 3 [Source:NCBI gene;Acc:109997282]	gas2l3		34.4498	0.635287	0.271675	2.33841	0.0193662	0.367478
ENSLBEG00000016181	0	0		309.177	-0.761114	0.325598	-2.33759	0.0194087	0.367478
ENSLBEG00000020589	0	0		17.0018	-1.04795	0.448439	-2.33689	0.0194451	0.367478
ENSLBEG00000025698	0	0		84.0605	0.569575	0.243734	2.33687	0.0194458	0.367478
ENSLBEG00000011381	ras and Rab interactor 2-like [Source:NCBI gene;Acc:109991901]	0		344.405	-0.456787	0.195487	-2.33666	0.0194569	0.367478
ENSLBEG00000010287	caspase recruitment domain family member 11 [Source:NCBI gene;Acc:109996974]	card11		368.889	-0.458115	0.196144	-2.3356	0.0195119	0.367478
ENSLBEG00000011491	thioredoxin related transmembrane protein 3 [Source:NCBI gene;Acc:109983759]	TMX3		196.318	0.365329	0.156436	2.33533	0.0195261	0.367478
ENSLBEG00000023278	calcium activated nucleotidase 1 [Source:NCBI gene;Acc:109994243]	cant1a		166.318	0.616982	0.264207	2.33522	0.0195318	0.367478
ENSLBEG00000010065	integrin alpha-5-like [Source:NCBI gene;Acc:109994144]	0		123.924	0.573311	0.245519	2.33509	0.0195385	0.367478
ENSLBEG00000024271	NADPH oxidase organizer 1-like [Source:NCBI gene;Acc:109990431]	noxo1b		703.882	1.44708	0.619768	2.33488	0.0195496	0.367478
ENSLBEG00000005087	melanoregulin-like [Source:NCBI gene;Acc:109983115]	zgc:91968		36.6621	-0.945473	0.404938	-2.33486	0.0195507	0.367478
ENSLBEG00000024913	B and T lymphocyte associated [Source:NCBI gene;Acc:110001331]	0		160.598	-0.582152	0.249414	-2.33408	0.0195917	0.367651
ENSLBEG00000007333	apolipoprotein B-100-like [Source:NCBI gene;Acc:109989500]	apoba		20.8177	1.42674	0.611312	2.33389	0.0196014	0.367651
ENSLBEG00000002525	collagen triple helix repeat containing 1 [Source:NCBI gene;Acc:109984889]	cthrc1a		52.9547	1.41382	0.605931	2.3333	0.0196326	0.367846
ENSLBEG00000011912	selenide, water dikinase 2-like [Source:NCBI gene;Acc:109999398]	sephs2		327.563	0.592662	0.254166	2.3318	0.0197114	0.368381
ENSLBEG00000016555	uncharacterized LOC109985007 [Source:NCBI gene;Acc:109985007]	0		662.199	-0.44605	0.191299	-2.33169	0.019717	0.368381
ENSLBEG00000016420	prostaglandin E synthase 2 [Source:NCBI gene;Acc:110002515]	ptgesl		59.56	0.670036	0.287376	2.33157	0.0197235	0.368381
ENSLBEG00000021061	anthrax toxin receptor 1-like [Source:NCBI gene;Acc:109981210]	antxr1b		8.11489	1.28073	0.549429	2.33102	0.0197524	0.368532
ENSLBEG00000025853	copine-1-like [Source:NCBI gene;Acc:109981763]	cpne1		3424.02	-0.293217	0.125831	-2.33024	0.0197933	0.368621
ENSLBEG00000005704	guanylin-like [Source:NCBI gene;Acc:109991169]	0		4994.44	0.50156	0.215249	2.33014	0.0197989	0.368621
ENSLBEG00000006983	nuclear FMR1 interacting protein 2 [Source:NCBI gene;Acc:109981434]	nufip2		257.32	-0.377781	0.162397	-2.32628	0.0200039	0.371488
ENSLBEG00000022932	C-Jun-amino-terminal kinase-interacting protein 4-like [Source:NCBI gene;Acc:109988578]	SPAG9		663.186	-0.280296	0.120502	-2.32608	0.0200145	0.371488
ENSLBEG00000003254	endothelial PAS domain-containing protein 1-like [Source:NCBI gene;Acc:110000399]	epas1b		204.043	-0.551773	0.237214	-2.32605	0.0200158	0.371488
ENSLBEG00000016845	XIAP-associated factor 1-like [Source:NCBI gene;Acc:109986277]	xaf1		122.706	-0.581678	0.25015	-2.32532	0.020055	0.371827
ENSLBEG00000013460	C-type lectin domain family 10 member A-like [Source:NCBI gene;Acc:110001728]	0		231.167	0.810784	0.34928	2.3213	0.0202706	0.37543
ENSLBEG00000011932	TRPM8 channel-associated factor homolog [Source:NCBI gene;Acc:109991913]	si:ch211-210b2.3		376.982	0.384722	0.165808	2.32029	0.0203252	0.376049
ENSLBEG00000023885	adhesion G protein-coupled receptor L4 [Source:NCBI gene;Acc:109987973]	adgrl4		123.58	0.450178	0.194201	2.3181	0.0204439	0.377383
ENSLBEG00000027215	tetratricopeptide repeat protein 39C-like [Source:NCBI gene;Acc:109982664]	TTC39C		14.2905	0.806847	0.348089	2.31793	0.020453	0.377383
ENSLBEG00000004166	lipoic acid synthetase [Source:NCBI gene;Acc:109989935]	lias		35.4451	0.762067	0.328883	2.31714	0.0204962	0.377383
ENSLBEG00000005565	hyaluronan synthase 2 [Source:NCBI gene;Acc:109984833]	has2		27.1209	1.2032	0.519279	2.31705	0.0205009	0.377383
ENSLBEG00000025219	junctional adhesion molecule A-like [Source:NCBI gene;Acc:109993297]	f11r.1		5159.15	-0.230837	0.0996307	-2.31692	0.0205079	0.377383
ENSLBEG00000016011	prominin-1-A-like [Source:NCBI gene;Acc:109990762]	prom2		288.961	0.429221	0.18528	2.31661	0.0205252	0.377383
ENSLBEG00000021485	bromo adjacent homology domain containing 1 [Source:NCBI gene;Acc:109996177]	bahd1		37.0248	-0.773664	0.334062	-2.31593	0.020562	0.377666
ENSLBEG00000007258	0	0		75.4338	0.74913	0.323569	2.31521	0.0206016	0.378001
ENSLBEG00000019490	0	0		11.8793	-0.820643	0.354526	-2.31476	0.020626	0.378058
ENSLBEG00000028304	0	0		6.83709	-1.47311	0.636857	-2.31309	0.0207177	0.379088
ENSLBEG00000021176	dispanin subfamily A member 2b-like [Source:NCBI gene;Acc:110004923]	0		7.55513	-1.48835	0.643548	-2.31272	0.0207381	0.379088
ENSLBEG00000003145	E3 ubiquitin-protein ligase Midline-1-like [Source:NCBI gene;Acc:109984134]	0		45.1004	-0.655268	0.283351	-2.31257	0.0207464	0.379088
ENSLBEG00000023904	serine/threonine-protein kinase MARK1-like [Source:NCBI gene;Acc:110002708]	mark1		246.752	-0.555966	0.240599	-2.31076	0.020846	0.38028
ENSLBEG00000011749	rap1 GTPase-activating protein 1-like [Source:NCBI gene;Acc:109986213]	rap1gap		510.81	0.511365	0.221312	2.31061	0.0208546	0.38028
ENSLBEG00000019647	SLIT-ROBO Rho GTPase-activating protein 3-like [Source:NCBI gene;Acc:109985091]	arhgap4b		719.248	-0.431656	0.18685	-2.31018	0.0208784	0.380321
ENSLBEG00000012207	spalt-like transcription factor 1a [Source:ZFIN;Acc:ZDB-GENE-020228-2]	sall1a		19.1817	1.04633	0.453026	2.30966	0.0209071	0.380454
ENSLBEG00000019655	tyrosine kinase non receptor 2 [Source:NCBI gene;Acc:109997782]	tnk2b		96.9658	-0.415837	0.18008	-2.30918	0.0209338	0.380549
ENSLBEG00000011046	membrane palmitoylated protein 5 [Source:NCBI gene;Acc:109979441]	mpp5b		33.0894	0.627957	0.272022	2.30847	0.0209728	0.380866
ENSLBEG00000026816	protein kinase C epsilon [Source:NCBI gene;Acc:109993324]	0		393.015	-0.444593	0.192667	-2.30757	0.0210233	0.381047
ENSLBEG00000023253	transmembrane protein 184A [Source:NCBI gene;Acc:109990380]	tmem184a		1989.34	-0.348294	0.150958	-2.30723	0.021042	0.381047
ENSLBEG00000007455	pyruvate dehydrogenase (acetyl-transferring) kinase isozyme 2, mitochondrial-like [Source:NCBI gene;Acc:109991828]	pdk2b		1415.58	0.569801	0.246974	2.30713	0.0210474	0.381047
ENSLBEG00000005964	RNA polymerase II elongation factor ELL-like [Source:NCBI gene;Acc:109990523]	0		79.4549	0.496737	0.215353	2.30661	0.0210763	0.381182
ENSLBEG00000000340	0	0		27.6783	-0.653663	0.283526	-2.30548	0.0211399	0.381942
ENSLBEG00000010130	ankyrin repeat and BTB/POZ domain-containing protein BTBD11-A [Source:NCBI gene;Acc:109993590]	BTBD11		19.3497	-0.942723	0.409025	-2.30481	0.0211775	0.382231
ENSLBEG00000016743	N(alpha)-acetyltransferase 40, NatD catalytic subunit [Source:NCBI gene;Acc:109991338]	naa40		382.773	-0.306761	0.133124	-2.30433	0.0212041	0.382252
ENSLBEG00000011765	numb-like protein [Source:NCBI gene;Acc:109991919]	numbl		82.716	0.561356	0.243681	2.30365	0.0212421	0.382252
ENSLBEG00000026763	sterile alpha motif domain containing 13 [Source:NCBI gene;Acc:109995061]	samd13		70.1658	-0.472945	0.205304	-2.30363	0.0212434	0.382252
ENSLBEG00000019826	WD repeat domain 34 [Source:NCBI gene;Acc:109988517]	wdr34		7.66749	0.938547	0.407645	2.30236	0.0213148	0.382787
ENSLBEG00000009131	nuclear casein kinase and cyclin dependent kinase substrate 1 [Source:NCBI gene;Acc:109983160]	nucks1a		921.881	-0.295381	0.128313	-2.30204	0.0213329	0.382787
ENSLBEG00000022157	meiosis/spermiogenesis associated 1 [Source:NCBI gene;Acc:110003245]	meig1		7.46564	1.28818	0.559604	2.30195	0.021338	0.382787
ENSLBEG00000018876	transcription factor Sp3-like [Source:NCBI gene;Acc:109998309]	sp3b		369.576	-0.514878	0.223758	-2.30105	0.0213887	0.383307
ENSLBEG00000026230	FYVE, RhoGEF and PH domain-containing protein 5-like [Source:NCBI gene;Acc:109983417]	fgd5a		191.372	0.566127	0.246145	2.29997	0.0214499	0.384016
ENSLBEG00000021637	tetratricopeptide repeat domain 7B [Source:NCBI gene;Acc:109990855]	ttc7b		621.774	-0.326427	0.141978	-2.29914	0.0214969	0.384468
ENSLBEG00000006342	retinol binding protein 4 [Source:NCBI gene;Acc:109990572]	rbp4		1438.71	0.760132	0.33072	2.29842	0.0215381	0.384818
ENSLBEG00000026853	zinc finger protein 438 [Source:NCBI gene;Acc:109987490]	znf438		305.546	-0.268475	0.116867	-2.29726	0.021604	0.385606
ENSLBEG00000011416	cadherin-7-like [Source:NCBI gene;Acc:109983806]	0		75.4516	0.554257	0.241341	2.29657	0.0216431	0.385914
ENSLBEG00000018772	0	0		15.2672	2.36785	1.03239	2.29356	0.0218157	0.388601
ENSLBEG00000000278	immediate early response 3 interacting protein 1 [Source:NCBI gene;Acc:109985951]	IER3IP1		299.343	0.354238	0.154534	2.29229	0.0218889	0.389135
ENSLBEG00000015112	prostaglandin E receptor 2a (subtype EP2) [Source:ZFIN;Acc:ZDB-GENE-040426-1321]	ptger2a		15.8946	0.996156	0.434571	2.29228	0.0218897	0.389135
ENSLBEG00000026670	teashirt homolog 1-like [Source:NCBI gene;Acc:109984540]	tshz1		33.3426	0.635655	0.277377	2.29167	0.0219249	0.389367
ENSLBEG00000020381	TRAF3-interacting JNK-activating modulator-like [Source:NCBI gene;Acc:109982810]	0		699.2	-0.507	0.221279	-2.29122	0.0219505	0.389367
ENSLBEG00000023097	MAPK regulated corepressor interacting protein 1 [Source:NCBI gene;Acc:109993853]	mcrip1		467.718	-0.265839	0.116041	-2.29091	0.0219687	0.389367
ENSLBEG00000028788	heparan-alpha-glucosaminide N-acetyltransferase [Source:NCBI gene;Acc:109992803]	hgsnat		619.006	-0.306328	0.133738	-2.2905	0.0219921	0.389391
ENSLBEG00000013518	stress-induced-phosphoprotein 1-like [Source:NCBI gene;Acc:109998183]	0		84.5387	0.523735	0.228741	2.28964	0.0220425	0.389894
ENSLBEG00000022520	heterogeneous nuclear ribonucleoprotein U [Source:NCBI gene;Acc:109982318]	hnrnpub		1952.51	-0.405238	0.177062	-2.28868	0.0220979	0.390484
ENSLBEG00000018924	sodium channel protein type 8 subunit alpha-like [Source:NCBI gene;Acc:109992489]	scn8ab		87.6477	-0.544065	0.237764	-2.28825	0.0221228	0.390493
ENSLBEG00000018935	serine/threonine-protein phosphatase 2B catalytic subunit alpha isoform-like [Source:NCBI gene;Acc:109986301]	ppp3ccb		1518.96	-0.250626	0.109543	-2.28791	0.0221425	0.390493
ENSLBEG00000012912	0	0		8.85258	-1.21456	0.531036	-2.28716	0.0221864	0.390878
ENSLBEG00000023311	purinergic receptor P2Y1 [Source:NCBI gene;Acc:109985704]	p2ry1		54.0351	0.699663	0.306128	2.28553	0.022282	0.391606
ENSLBEG00000010100	0	0		71.0009	1.15574	0.505696	2.28544	0.0222869	0.391606
ENSLBEG00000001688	glycoprotein A33 [Source:NCBI gene;Acc:109995114]	0		2957.7	-0.325965	0.142643	-2.28518	0.0223023	0.391606
ENSLBEG00000010948	carbonic anhydrase 1 [Source:NCBI gene;Acc:109983756]	0		1293.28	0.530431	0.232142	2.28494	0.0223162	0.391606
ENSLBEG00000018638	galectin-related protein B-like [Source:NCBI gene;Acc:110002560]	si:ch211-10a23.2		51.3477	1.17857	0.516014	2.28399	0.0223723	0.392202
ENSLBEG00000002520	tyrosine-protein kinase JAK2-like [Source:NCBI gene;Acc:110000365]	jak3		650.382	-0.422183	0.184923	-2.28302	0.0224294	0.392814
ENSLBEG00000012349	protein S [Source:NCBI gene;Acc:109985550]	pros1		400.911	0.542481	0.237684	2.28236	0.022468	0.392869
ENSLBEG00000025359	eukaryotic translation initiation factor 3 subunit H [Source:NCBI gene;Acc:109997918]	eif3ha		1996.8	0.344532	0.15097	2.28213	0.0224819	0.392869
ENSLBEG00000008561	intersectin-2-like [Source:NCBI gene;Acc:109990056]	itsn2a		1960.39	-0.406028	0.177939	-2.28183	0.0224991	0.392869
ENSLBEG00000027348	TNF receptor superfamily member 21 [Source:NCBI gene;Acc:109991676]	tnfrsf21		135.252	0.393685	0.17263	2.28051	0.0225776	0.393488
ENSLBEG00000023413	CEBPZ opposite strand [Source:NCBI gene;Acc:110000251]	CEBPZOS		32.8622	-0.458467	0.201039	-2.28048	0.022579	0.393488
ENSLBEG00000021819	Fas associated via death domain [Source:NCBI gene;Acc:109998901]	fadd		575.114	-0.432201	0.189564	-2.27998	0.0226091	0.393626
ENSLBEG00000001979	vesicle-associated membrane protein 5-like [Source:NCBI gene;Acc:109985937]	vamp5		527.365	-0.288615	0.126657	-2.27872	0.0226837	0.394536
ENSLBEG00000002516	ras-related protein Rab-5A [Source:NCBI gene;Acc:109999235]	rab5aa		274.489	-0.259044	0.113706	-2.27819	0.0227152	0.394696
ENSLBEG00000006861	solute carrier family 25 member 16 [Source:NCBI gene;Acc:109994677]	slc25a16		732.669	-0.32078	0.140876	-2.27704	0.0227837	0.395497
ENSLBEG00000021599	lysine-specific demethylase 4B-like [Source:NCBI gene;Acc:109989703]	kdm4b		529.88	-0.377676	0.165931	-2.2761	0.02284	0.396048
ENSLBEG00000014261	calcium release activated channel regulator 2B [Source:NCBI gene;Acc:109982259]	cracr2b		508.807	0.352155	0.154772	2.27531	0.0228876	0.396048
ENSLBEG00000010866	diacylglycerol kinase zeta-like [Source:NCBI gene;Acc:110001119]	0		309.512	-0.31476	0.138375	-2.27468	0.0229251	0.396048
ENSLBEG00000024770	adhesion G protein-coupled receptor D1 [Source:NCBI gene;Acc:109983353]	adgrd1		43.0798	0.76073	0.334444	2.27461	0.0229291	0.396048
ENSLBEG00000002547	uncharacterized LOC109998558 [Source:NCBI gene;Acc:109998558]	0		302.199	-0.714965	0.314366	-2.27431	0.0229473	0.396048
ENSLBEG00000007800	epidermal growth factor receptor substrate 15-like 1 [Source:NCBI gene;Acc:110001612]	eps15l1a		19.2208	-0.820912	0.360956	-2.27427	0.0229496	0.396048
ENSLBEG00000027018	sushi, nidogen and EGF like domains 1 [Source:NCBI gene;Acc:109983377]	sned1		71.2982	0.655185	0.288165	2.27364	0.0229876	0.396318
ENSLBEG00000027305	eukaryotic translation initiation factor 4E type 2-like [Source:NCBI gene;Acc:110002813]	0		494.765	-0.49022	0.215813	-2.2715	0.0231169	0.398159
ENSLBEG00000016729	0	0		19.4724	-0.803502	0.35384	-2.27081	0.0231587	0.398491
ENSLBEG00000009007	organic solute carrier partner 1 [Source:NCBI gene;Acc:109983711]	OSCP1		23.3849	0.966933	0.426328	2.26805	0.0233263	0.400986
ENSLBEG00000001905	HRas proto-oncogene, GTPase [Source:NCBI gene;Acc:109990009]	hrasb		530.73	-0.315058	0.138964	-2.26719	0.0233785	0.401293
ENSLBEG00000012655	SH3 domain-binding protein 4 [Source:NCBI gene;Acc:109982689]	sh3bp4		115.759	0.49	0.216144	2.26701	0.0233895	0.401293
ENSLBEG00000010529	sialoadhesin-like [Source:NCBI gene;Acc:109986619]	si:dkey-238d18.5		169.52	-0.511075	0.225515	-2.26626	0.0234357	0.401697
[truncated: 17,036 more rows]

## Sheet: Lipid vs Cellulose
Gene_ID	Gene_description	Gene_name	baseMean	log2FoldChange	pvalue	padj
[truncated: 18,069 more rows]

## Sheet: Lipid vs Empty
			baseMean	log2FoldChange	lfcSE	stat	pvalue	padj
[truncated: 18,069 more rows]

[truncated: 4 more sheets: Cellulose vs Empty, Annotation, Gene Symbol and Synonyms, Venny]
