# Supplementary material for: Physical and nutrient stimuli differentially modulate gut motility patterns, gut transit rate, and transcriptome in an agastric fish, the ballan wrasse
Source: PLoS One. 2021 Feb 11;16(2):e0247076. doi: 10.1371/journal.pone.0247076 (PMC7877642; doi:10.1371/journal.pone.0247076)
Supplement: S3 Table — (XLSX) [file pone.0247076.s005.xlsx]

## Sheet: Protein vs Cellulose up
Annotation Cluster 1	Enrichment Score: 29.69516652176412
Category	Term	Count	%	PValue	Genes	List Total	Pop Hits	Pop Total	Fold Enrichment	Bonferroni	Benjamini	FDR
GOTERM_BP_DIRECT	GO:0006614~SRP-dependent cotranslational protein targeting to membrane	41	13.5314	1.7734e-46	RPL18, RPL17, RPL14, RPL13, RPS15A, RPLP2, RPL36, RPL37, RPL38, RPL39, RPS3, RPS26, RPS27, RPS28, RPL6, RPL31, RPS3A, RPLP0, RPLP1, RPL3, RPL10, RPL5, RPL4, RPS20, RPS23, RPSA, RPL26, RPL24, RPL23A, RPS6, RPL29, RPS18, RPS19, RPS16, RPL22, RPL13A, RPL21, RPS12, RPS13, RPS11, UBA52	284	94	16792	25.7893	2.8197e-43	2.8197e-43	2.96733e-43
GOTERM_BP_DIRECT	GO:0006364~rRNA processing	53	17.4917	1.01416e-45	RPL18, RPL17, RPL14, RPL13, RPLP2, RPS3, DKC1, RRP1B, RPS3A, RPLP0, RPLP1, RPL10, MRM2, RPS18, RPS19, RPS16, RPS12, RPS13, RPS11, UBA52, RPL36, RPS15A, RPL37, RPL38, RPL39, FCF1, BMS1, RPS26, RPS27, WDR18, RPS28, DDX49, RPL6, RPL31, RPL3, RPL5, RPL4, RPS20, RPS23, RPSA, TBL3, CCDC86, RPL26, RPL23A, RPL24, RPS6, FBL, RPL29, DDX56, RPL22, RPL13A, RPL21, UTP14C	284	214	16792	14.6435	1.61252e-42	8.06259e-43	1.69694e-42
GOTERM_BP_DIRECT	GO:0006413~translational initiation	44	14.5215	3.99617e-43	RPL18, EIF6, RPL17, RPL14, RPL13, RPS15A, RPLP2, RPL36, RPL37, RPL38, RPL39, RPS3, RPS26, RPS27, RPS28, RPS3A, EIF3H, RPL31, RPL6, RPLP0, RPLP1, RPL3, RPL10, RPL5, EIF3I, RPL4, RPS20, RPS23, RPSA, RPL26, RPL24, RPL23A, RPS6, RPL29, RPS18, RPS19, RPS16, RPL22, RPL13A, RPL21, RPS12, RPS13, RPS11, UBA52	284	137	16792	18.9896	6.35391e-40	2.11797e-40	6.68657e-40
GOTERM_BP_DIRECT	GO:0019083~viral transcription	41	13.5314	9.32295e-43	RPL18, RPL17, RPL14, RPL13, RPS15A, RPLP2, RPL36, RPL37, RPL38, RPL39, RPS3, RPS26, RPS27, RPS28, RPL6, RPL31, RPS3A, RPLP0, RPLP1, RPL3, RPL10, RPL5, RPL4, RPS20, RPS23, RPSA, RPL26, RPL24, RPL23A, RPS6, RPL29, RPS18, RPS19, RPS16, RPL22, RPL13A, RPL21, RPS12, RPS13, RPS11, UBA52	284	112	16792	21.6446	1.48235e-39	3.70587e-40	1.55996e-39
GOTERM_BP_DIRECT	GO:0000184~nuclear-transcribed mRNA catabolic process, nonsense-mediated decay	41	13.5314	1.62571e-41	RPL18, RPL17, RPL14, RPL13, RPS15A, RPLP2, RPL36, RPL37, RPL38, RPL39, RPS3, RPS26, RPS27, RPS28, RPL6, RPL31, RPS3A, RPLP0, RPLP1, RPL3, RPL10, RPL5, RPL4, RPS20, RPS23, RPSA, RPL26, RPL24, RPL23A, RPS6, RPL29, RPS18, RPS19, RPS16, RPL22, RPL13A, RPL21, RPS12, RPS13, RPS11, UBA52	284	119	16792	20.3714	2.58488e-38	5.16976e-39	2.72021e-38
UP_KEYWORDS	Ribosomal protein	43	14.1914	6.32885e-38	RPL18, RPL17, RPL14, RPL13, RPS15A, RPLP2, RPL36, RPL37, RPL22L1, RPL38, RPL39, RPS3, RPS26, RPS27, RPS28, MRPL12, RPS3A, RPL31, RPL6, RPLP0, RPLP1, RPL3, RPL10, RPL5, RPL4, RPS20, RPS23, RPSA, RPL26, RPL24, RPL23A, RPS6, RPL29, RPS18, RPS19, RPS16, RPL22, RPL13A, RPL21, RPS12, RPS13, RPS11, UBA52	303	185	20581	15.7878	1.9746e-35	1.9746e-35	8.50782e-35
KEGG_PATHWAY	hsa03010:Ribosome	43	14.1914	8.02359e-38	RPL18, RPL17, RPL14, RPL13, RPS15A, RPLP2, RPL36, RPL37, RPL22L1, RPL38, RPL39, RPS3, RPS26, RPS27, RPS28, MRPL12, RPS3A, RPL31, RPL6, RPLP0, RPLP1, RPL3, RPL10, RPL5, RPL4, RPS20, RPS23, RPSA, RPL26, RPL24, RPL23A, RPS6, RPL29, RPS18, RPS19, RPS16, RPL22, RPL13A, RPL21, RPS12, RPS13, RPS11, UBA52	156	136	6879	13.9422	1.41215e-35	1.41215e-35	9.84595e-35
UP_KEYWORDS	Ribonucleoprotein	47	15.5116	1.19906e-33	RPL18, RPL17, RPL14, RPL13, RPS15A, RPLP2, RPL36, RPL37, RPL22L1, RPL38, RPL39, RPS3, RPS26, RPS27, RPS28, MRPL12, DKC1, RPS3A, RPL31, RPL6, RPLP0, RPLP1, RPL3, RPL10, RPL5, RPL4, RPS20, RPS23, RPSA, RPL26, RPL24, RPL23A, RPS6, FBL, RPL29, RPS18, RPS19, RPS16, RPL22, RPL13A, RPL21, RPS12, RPS13, RPS11, NHP2, UBA52, UTP14C	303	296	20581	10.7852	3.74107e-31	1.87053e-31	1.61189e-30
GOTERM_MF_DIRECT	GO:0003735~structural constituent of ribosome	43	14.1914	4.47153e-32	RPL18, RPL17, RPL14, RPL13, RPS15A, RPLP2, RPL36, RPL37, RPL22L1, RPL38, RPL39, RPS3, RPS26, RPS27, RPS28, MRPL12, RPS3A, RPL31, RPL6, RPLP0, RPLP1, RPL3, RPL10, RPL5, RPL4, RPS20, RPS23, RPSA, RPL26, RPL24, RPL23A, RPS6, RPL29, RPS18, RPS19, RPS16, RPL22, RPL13A, RPL21, RPS12, RPS13, RPS11, UBA52	286	222	16881	11.4327	2.14634e-29	2.14634e-29	6.40223e-29
GOTERM_CC_DIRECT	GO:0005840~ribosome	38	12.5413	8.6528e-32	RPL18, RPL14, RPL13, RPS15A, RPLP2, RPL36, RPL37, RPL22L1, RPL38, RPS3, RPS26, RPS27, RPS28, RPL6, RPL31, RPS3A, RPLP0, RPLP1, RPL3, RPL10, RPL5, RPL4, RPS20, RPS23, MT3, RPL24, RPL23A, RPS6, RPL29, RPS18, RPS19, RPS16, RPL22, RPL13A, RPL21, RPS13, RPS11, UBA52	294	166	18224	14.1897	2.24973e-29	2.24973e-29	1.13102e-28
GOTERM_CC_DIRECT	GO:0022625~cytosolic large ribosomal subunit	28	9.24092	4.07628e-31	RPL18, RPL17, RPL14, RPL13, RPL26, RPL36, RPLP2, RPL24, RPL23A, RPL37, RPL22L1, RPL38, FXR2, RPL39, RPL29, RPL22, RPL13A, RPL31, RPL6, RPL21, RPLP0, RPLP1, RPL3, RPL10, RPL5, RPL4, NHP2, UBA52	294	68	18224	25.5238	1.05983e-28	5.29917e-29	5.32815e-28
GOTERM_BP_DIRECT	GO:0006412~translation	44	14.5215	7.82241e-31	RPL18, RPL17, RPL14, RPL13, RPS15A, RPLP2, RPL36, RPL37, RPL22L1, RPL38, RPL39, RPS3, RPS26, RPS27, RPS28, RPS3A, RPL31, RPL6, RPLP0, RPLP1, RPL3, RPL10, RPL5, RPL4, RPS20, TNIP1, RPS23, RPSA, RPL26, RPL24, RPL23A, RPS6, RPL29, RPS18, RPS19, RPS16, RPL22, RPL13A, RPL21, RPS12, RPS13, RPS11, NHP2, UBA52	284	253	16792	10.2829	1.24376e-27	2.07294e-28	1.30888e-27
GOTERM_MF_DIRECT	GO:0044822~poly(A) RNA binding	68	22.4422	3.24441e-20	RPL17, FASTKD1, RPL14, RPL13, YBX1, RPS3, MAK16, DKC1, RRP1B, GRWD1, RPS3A, RPLP0, DDX24, RPL10, RBMS1, RPS18, RPS19, KRT18, SEC61B, RPS16, SERBP1, RPS12, NOL10, RPS13, NOP9, RPS11, NHP2, RPS15A, RPL36, MTIF2, FCF1, BMS1, PATL1, RPS26, RPS27, RPS28, DDX49, RPL6, RPL31, EIF3H, CEBPZ, RPL3, NAT10, RPL5, RPS20, RPL4, RPS23, RPSA, CCDC86, TBL3, RPL26, RPL23A, RPL24, RPS6, FXR2, RPF1, FBL, RPL29, DDX5…	286	1129	16881	3.55506	1.55732e-17	7.78659e-18	4.64527e-17
GOTERM_CC_DIRECT	GO:0022627~cytosolic small ribosomal subunit	16	5.28053	5.69679e-16	RPSA, RPS15A, RPS6, RPS3, RPS26, RPS18, RPS27, RPS28, RPS19, RPS16, RPS3A, RPS12, RPS13, RPS20, RPS11, RPS23	294	48	18224	20.6621	1.44329e-13	4.80727e-14	7.21645e-13
GOTERM_MF_DIRECT	GO:0003723~RNA binding	37	12.2112	2.73062e-12	RPL18, GTF3A, RPL14, RPL13, RPS15A, NUFIP1, RPL37, RPL38, RPL39, YBX1, RPS3, PATL1, MRPL12, RPS28, DKC1, RPL6, RPL31, RPS3A, RPL3, RPL5, RPL4, RPS20, TARSL2, RBMS1, RPL26, RPL24, FXR2, FBL, RPF1, RPL29, RPS18, RPS16, SRSF6, RPL22, RPL21, DDX54, NHP2	286	547	16881	3.99251	1.31068e-09	4.36895e-10	3.90959e-09
GOTERM_CC_DIRECT	GO:0005925~focal adhesion	23	7.59076	3.97372e-07	RPL18, RPLP2, RPL38, SPRY4, RPS3, RPS18, RPS19, RPS16, RPS3A, RPL31, RPL6, RPL13A, RPL22, RPLP0, RPLP1, RPL3, TGM2, SDCBP, RPS13, RPL5, CNN2, RPL4, RPS11	294	391	18224	3.64626	0.000103311	1.29145e-05	0.000519407
GOTERM_CC_DIRECT	GO:0005829~cytosol	88	29.0429	9.26911e-07	EIF6, RPL18, RPL17, RPL14, RPL13, CRCP, RPLP2, PNP, AMOTL2, RPS3, RRP1B, RPS3A, MAT1A, RPLP0, GAB1, RPLP1, IL1B, RPL10, MT3, CARS, IRS2, BCR, SOCS3, FBP1, NAPRT, RPS18, RPS19, SEC61B, RPS16, C1QBP, RGCC, RPS12, SDCBP, RPS13, RPS11, EEF1D, EMP2, UBA52, TRIM39, RBP4, AHCY, HSD17B14, RPS15A, RPL36, STARD10, RPL37, RPL38, RPL39, PATL1, RPS26, PSMB7, RPS27, RPS28, HSPA2, RPL6, RPL31, EIF3H, TGM2, RPL3…	294	3315	18224	1.64549	0.000240968	2.67771e-05	0.00121157
Annotation Cluster 2	Enrichment Score: 4.5974582714809875
Category	Term	Count	%	PValue	Genes	List Total	Pop Hits	Pop Total	Fold Enrichment	Bonferroni	Benjamini	FDR
UP_KEYWORDS	Ribosome biogenesis	10	3.30033	4.35608e-07	EIF6, DDX56, SDAD1, C1QBP, DKC1, FCF1, NHP2, BMS1, UTP14C, RPF1	303	65	20581	10.4499	0.0001359	2.71816e-05	0.000585583
KEGG_PATHWAY	hsa03008:Ribosome biogenesis in eukaryotes	10	3.30033	0.000135752	EIF6, TBL3, DKC1, POP1, NAT10, FCF1, NHP2, BMS1, UTP14C, FBL	156	87	6879	5.06852	0.0236107	0.0118759	0.166457
UP_KEYWORDS	rRNA processing	8	2.64026	0.000272762	DDX56, DKC1, NAT10, FCF1, NHP2, FBL, RPF1, MRM2	303	86	20581	6.31852	0.0815918	0.00706769	0.36605
Annotation Cluster 3	Enrichment Score: 3.54547095605567
Category	Term	Count	%	PValue	Genes	List Total	Pop Hits	Pop Total	Fold Enrichment	Bonferroni	Benjamini	FDR
UP_KEYWORDS	Secreted	59	19.4719	1.83808e-07	TUFT1, MMP9, GDF6, FSTL3, YBX1, MMP25, IL11, CFP, CFHR1, SERPINA9, MMP20, HMCN1, RSPO3, LCAT, SERPINE1, CSF3R, LTF, IL1B, TSKU, CYR61, LIFR, PDYN, CD163, INHBB, INHBA, BPI, C1QBP, CPXM1, NPPC, SDCBP, LAMC1, TNFRSF6B, RBP4, APOC1, GREM1, ADCYAP1, TAC3, CALCB, LAMB3, CCL20, NMU, SPP1, SCG2, LPL, MUC2, NPB, AIMP1, ADAM23, FETUB, EFEMP2, PIBF1, QPCT, VWF, PNOC, PENK, GDF11, ANTXR2, IGFBP1, CHRD	303	1965	20581	2.03945	5.73465e-05	1.91159e-05	0.000247092
GOTERM_CC_DIRECT	GO:0005576~extracellular region	45	14.8515	0.000347874	TNFRSF6B, RBP4, TUFT1, MMP9, GDF6, FSTL3, APOC1, PNP, IL11, ADCYAP1, TAC3, CFP, CALCB, MMP20, LAMB3, PRRG1, CCL20, RSPO3, LCAT, SERPINE1, LTF, CSF3R, IL1B, LFNG, NMU, SPP1, CYR61, LPL, NPB, ADAM23, FETUB, EFEMP2, PDYN, CD163, INHBB, VWF, INHBA, PENK, PNOC, NPPC, GDF11, ANTXR2, IGFBP1, LAMC1, F2R	294	1610	18224	1.73254	0.0864919	0.00693454	0.453756
UP_KEYWORDS	Disulfide bond	69	22.7723	0.0050429	CCKAR, PEAR1, MMP9, GDF6, JAG2, FSTL3, MMP25, CANT1, CFHR1, CFP, MMP20, HMCN1, MAT1A, LCAT, RSPO3, CSF3R, LTF, CYR61, KIAA1324L, LIFR, CHST2, PDYN, CD163, INHBB, INHBA, BPI, CHRM3, CHRM1, GRM6, CPXM1, TXNRD3, NPPC, LAMC1, SEMA4A, TNFRSF6B, RBP4, CYSLTR1, TNFRSF12A, FPR1, ITGB4, ASTN1, GPR68, BDKRB2, GREM1, SLCO2A1, CALCB, LAMB3, CCL20, PRRG1, LFNG, MRC1, LPL, MUC2, ADAM23, EFEMP2, FETUB, TGFBR2, …	303	3434	20581	1.36481	0.793481	0.0839015	6.57048
UP_KEYWORDS	Signal	77	25.4125	0.0204009	SLC13A5, PEAR1, MMP9, GDF6, SLC9A3, JAG2, FSTL3, SHE, MMP25, IL11, CFHR1, CFP, ACVR1B, MMP20, SERPINA9, HMCN1, LCAT, RSPO3, SERPINE1, CSF3R, IGFLR1, LTF, SLC51A, TSKU, CYR61, KIAA1324L, ELP2, LIFR, PDYN, CD163, INHBB, INHBA, BPI, GRM6, CPXM1, NPPC, LAMC1, SEMA4A, TNFRSF6B, RBP4, GPRC5C, TNFRSF12A, ITGB4, APOC1, ASTN1, GREM1, ADCYAP1, TAC3, CALCB, LAMB3, CCL20, NUDT9, NMU, SCG2, SPP1, MRC1, LPL, M…	303	4160	20581	1.25725	0.998389	0.263785	24.2009
Annotation Cluster 4	Enrichment Score: 2.984271292858248
Category	Term	Count	%	PValue	Genes	List Total	Pop Hits	Pop Total	Fold Enrichment	Bonferroni	Benjamini	FDR
GOTERM_MF_DIRECT	GO:0008528~G-protein coupled peptide receptor activity	5	1.65017	0.000201943	GPR84, CYSLTR1, LTB4R, LTB4R2, NPR1	286	18	16881	16.3957	0.0923917	0.0192017	0.288748
GOTERM_BP_DIRECT	GO:0007200~phospholipase C-activating G-protein coupled receptor signaling pathway	7	2.31023	0.000846062	GPR84, CCKAR, CYSLTR1, LTB4R, LTB4R2, FPR1, F2R	284	66	16792	6.27102	0.739671	0.0916533	1.40629
GOTERM_MF_DIRECT	GO:0004974~leukotriene receptor activity	3	0.990099	0.00166643	CYSLTR1, LTB4R, LTB4R2	286	4	16881	44.2684	0.55092	0.108068	2.35966
GOTERM_BP_DIRECT	GO:0061737~leukotriene signaling pathway	3	0.990099	0.00405973	CYSLTR1, LTB4R, LTB4R2	284	6	16792	29.5634	0.998448	0.276319	6.58025
Annotation Cluster 5	Enrichment Score: 2.1115739775831357
Category	Term	Count	%	PValue	Genes	List Total	Pop Hits	Pop Total	Fold Enrichment	Bonferroni	Benjamini	FDR
UP_KEYWORDS	Neuropeptide	6	1.9802	3.3615e-05	NPB, PNOC, PENK, PDYN, NMU, TAC3	303	26	20581	15.6748	0.0104333	0.00104826	0.045179
UP_KEYWORDS	Opioid peptide	3	0.990099	0.00063759	PNOC, PENK, PDYN	303	3	20581	67.9241	0.180443	0.0151905	0.853715
GOTERM_MF_DIRECT	GO:0005184~neuropeptide hormone activity	5	1.65017	0.00154234	CALCB, PNOC, PENK, PDYN, ADCYAP1	286	30	16881	9.83741	0.523313	0.116163	2.18575
GOTERM_MF_DIRECT	GO:0001515~opioid peptide activity	3	0.990099	0.00166643	PNOC, PENK, PDYN	286	4	16881	44.2684	0.55092	0.108068	2.35966
GOTERM_MF_DIRECT	GO:0031628~opioid receptor binding	3	0.990099	0.00166643	PNOC, PENK, PDYN	286	4	16881	44.2684	0.55092	0.108068	2.35966
GOTERM_CC_DIRECT	GO:0043679~axon terminus	5	1.65017	0.00730941	PNOC, CHRM3, PENK, CHRM1, PDYN	294	48	18224	6.45692	0.851538	0.112382	9.14386
GOTERM_BP_DIRECT	GO:0007600~sensory perception	3	0.990099	0.0195308	PNOC, PENK, PDYN	284	13	16792	13.6446	1	0.64844	28.1099
GOTERM_CC_DIRECT	GO:0030425~dendrite	9	2.9703	0.174248	PNOC, CHRM3, PENK, MLPH, RPLP0, CHRM1, GRM6, PDYN, RPS6	294	335	18224	1.66531	1	0.788942	91.8128
GOTERM_BP_DIRECT	GO:0007268~chemical synaptic transmission	6	1.9802	0.379146	PNOC, PENK, SLC12A4, GRM6, SDCBP, PDYN	284	240	16792	1.47817	1	0.998982	99.9656
GOTERM_CC_DIRECT	GO:0043025~neuronal cell body	4	1.32013	0.884815	RPSA, PNOC, PENK, PDYN	294	315	18224	0.787129	1	0.999846	100
Annotation Cluster 6	Enrichment Score: 1.9880386164054382
Category	Term	Count	%	PValue	Genes	List Total	Pop Hits	Pop Total	Fold Enrichment	Bonferroni	Benjamini	FDR
GOTERM_BP_DIRECT	GO:0098609~cell-cell adhesion	12	3.9604	0.00646424	RPS26, KRT18, RPL14, RPL6, SERBP1, SDCBP, RPL24, CNN2, RPL23A, EEF1D, PAICS, RPL29	284	271	16792	2.61816	0.999967	0.361304	10.2833
GOTERM_MF_DIRECT	GO:0098641~cadherin binding involved in cell-cell adhesion	12	3.9604	0.0105919	RPS26, KRT18, RPL14, RPL6, SERBP1, SDCBP, RPL24, CNN2, RPL23A, EEF1D, PAICS, RPL29	286	290	16881	2.44239	0.993971	0.346841	14.1407
GOTERM_CC_DIRECT	GO:0005913~cell-cell adherens junction	12	3.9604	0.0158633	RPS26, KRT18, RPL14, RPL6, SERBP1, SDCBP, RPL24, CNN2, RPL23A, EEF1D, PAICS, RPL29	294	323	18224	2.3029	0.984354	0.216951	18.8615
Annotation Cluster 7	Enrichment Score: 1.779950172510266
Category	Term	Count	%	PValue	Genes	List Total	Pop Hits	Pop Total	Fold Enrichment	Bonferroni	Benjamini	FDR
GOTERM_MF_DIRECT	GO:0005125~cytokine activity	10	3.30033	0.00307108	INHBB, INHBA, AIMP1, GDF6, GDF11, IL1B, GREM1, SPP1, IL11, SCG2	286	176	16881	3.35366	0.771539	0.16852	4.3083
UP_KEYWORDS	Cytokine	8	2.64026	0.0223972	AIMP1, CCL20, GDF6, GDF11, IL1B, GREM1, SPP1, IL11	303	190	20581	2.85996	0.999148	0.274754	26.2513
GOTERM_BP_DIRECT	GO:0007267~cell-cell signaling	9	2.9703	0.0664758	INHBA, AIMP1, CCL20, STAB1, IL1B, GREM1, IL11, ADCYAP1, CYR61	284	254	16792	2.09504	1	0.87301	68.3679
Annotation Cluster 8	Enrichment Score: 1.5502840273728626
Category	Term	Count	%	PValue	Genes	List Total	Pop Hits	Pop Total	Fold Enrichment	Bonferroni	Benjamini	FDR
GOTERM_BP_DIRECT	GO:0010862~positive regulation of pathway-restricted SMAD protein phosphorylation	6	1.9802	0.00124259	INHBB, ACVR1B, INHBA, GDF6, GDF11, SDCBP	284	48	16792	7.39085	0.861508	0.123481	2.05896
GOTERM_BP_DIRECT	GO:0032924~activin receptor signaling pathway	4	1.32013	0.00225414	INHBB, ACVR1B, INHBA, GDF6	284	16	16792	14.7817	0.97235	0.180729	3.70559
GOTERM_MF_DIRECT	GO:0005125~cytokine activity	10	3.30033	0.00307108	INHBB, INHBA, AIMP1, GDF6, GDF11, IL1B, GREM1, SPP1, IL11, SCG2	286	176	16881	3.35366	0.771539	0.16852	4.3083
GOTERM_BP_DIRECT	GO:0043408~regulation of MAPK cascade	5	1.65017	0.00489925	INHBB, INHBA, ID1, GDF6, GDF11	284	41	16792	7.21058	0.999594	0.310546	7.8892
GOTERM_BP_DIRECT	GO:0040007~growth	4	1.32013	0.0113643	INHBB, INHBA, GDF6, GDF11	284	28	16792	8.44668	1	0.502892	17.4066
KEGG_PATHWAY	hsa04350:TGF-beta signaling pathway	7	2.31023	0.0113919	INHBB, ACVR1B, INHBA, ID1, GDF6, TGFBR2, CHRD	156	84	6879	3.67468	0.866878	0.489397	13.116
GOTERM_BP_DIRECT	GO:0048468~cell development	4	1.32013	0.0295827	INHBB, INHBA, GDF6, GDF11	284	40	16792	5.91268	1	0.734538	39.496
GOTERM_MF_DIRECT	GO:0005160~transforming growth factor beta receptor binding	4	1.32013	0.0336961	INHBB, INHBA, GDF6, GDF11	286	42	16881	5.62138	1	0.691245	38.7843
GOTERM_BP_DIRECT	GO:0060395~SMAD protein signal transduction	4	1.32013	0.0868298	INHBB, INHBA, GDF6, GDF11	284	62	16792	3.81463	1	0.909922	78.1257
GOTERM_BP_DIRECT	GO:0045444~fat cell differentiation	4	1.32013	0.125307	INHBB, ALOXE3, GDF6, IL11	284	73	16792	3.23982	1	0.956304	89.3562
UP_KEYWORDS	Growth factor	5	1.65017	0.127136	INHBB, INHBA, GDF6, GDF11, IL11	303	131	20581	2.59252	1	0.663045	83.9251
GOTERM_MF_DIRECT	GO:0008083~growth factor activity	6	1.9802	0.139772	INHBB, INHBA, GDF6, GDF11, JAG2, IL11	286	162	16881	2.18609	1	0.944464	88.4173
KEGG_PATHWAY	hsa04550:Signaling pathways regulating pluripotency of stem cells	5	1.65017	0.388031	INHBB, ACVR1B, INHBA, ID1, LIFR	156	140	6879	1.57486	1	0.986719	99.7585
GOTERM_BP_DIRECT	GO:0042981~regulation of apoptotic process	5	1.65017	0.484545	INHBB, GDF6, SERBP1, GDF11, RPS3	284	213	16792	1.38795	1	0.999767	99.9985
Annotation Cluster 9	Enrichment Score: 1.4974689560701668
Category	Term	Count	%	PValue	Genes	List Total	Pop Hits	Pop Total	Fold Enrichment	Bonferroni	Benjamini	FDR
UP_KEYWORDS	Protein biosynthesis	9	2.9703	0.00185572	EIF6, CARS, AIMP1, EIF3H, AIMP2, EIF3I, MTIF2, EEF1D, TARSL2	303	152	20581	4.02182	0.439834	0.037898	2.46603
UP_KEYWORDS	Initiation factor	4	1.32013	0.0534754	EIF6, EIF3H, EIF3I, MTIF2	303	58	20581	4.68442	1	0.424853	52.2313
GOTERM_MF_DIRECT	GO:0003743~translation initiation factor activity	4	1.32013	0.0839626	EIF6, EIF3H, EIF3I, MTIF2	286	61	16881	3.87046	1	0.865276	71.5106
GOTERM_BP_DIRECT	GO:0006446~regulation of translational initiation	3	0.990099	0.122849	EIF3H, EIF3I, MTIF2	284	36	16792	4.92723	1	0.955427	88.8444
Annotation Cluster 10	Enrichment Score: 1.4804519250397772
Category	Term	Count	%	PValue	Genes	List Total	Pop Hits	Pop Total	Fold Enrichment	Bonferroni	Benjamini	FDR
GOTERM_BP_DIRECT	GO:0001503~ossification	6	1.9802	0.0112968	MMP9, NPPC, FSTL3, LTF, RPL38, SPP1	284	80	16792	4.43451	1	0.514494	17.3122
GOTERM_CC_DIRECT	GO:0030141~secretory granule	5	1.65017	0.0313267	NPPC, FSTL3, LTF, IL1B, SCG2	294	74	18224	4.18827	0.999745	0.325686	34.0336
UP_KEYWORDS	Osteogenesis	3	0.990099	0.102276	NPPC, FSTL3, LTF	303	37	20581	5.50736	1	0.607443	76.5523
Annotation Cluster 11	Enrichment Score: 1.072367628407654
Category	Term	Count	%	PValue	Genes	List Total	Pop Hits	Pop Total	Fold Enrichment	Bonferroni	Benjamini	FDR
GOTERM_BP_DIRECT	GO:0031581~hemidesmosome assembly	3	0.990099	0.01671	LAMB3, ITGB4, LAMC1	284	12	16792	14.7817	1	0.603035	24.5697
GOTERM_BP_DIRECT	GO:0022617~extracellular matrix disassembly	5	1.65017	0.0394123	MMP20, LAMB3, MMP9, LAMC1, SPP1	284	76	16792	3.88992	1	0.78973	48.9728
GOTERM_BP_DIRECT	GO:0007155~cell adhesion	14	4.62046	0.0480219	RPSA, MAGI1, AIMP1, ADAM23, ITGB4, VWF, LAMB3, STAB1, CSF3R, LAMC1, SELE, EMP2, SPP1, CYR61	284	459	16792	1.80343	1	0.83109	56.1089
UP_KEYWORDS	Cell adhesion	13	4.29043	0.0510875	AIMP1, ADAM23, TNFRSF12A, ITGB4, ASTN1, VWF, LAMB3, DSG3, CSF3R, LAMC1, SELE, SPP1, CYR61	303	479	20581	1.84345	1	0.431166	50.5856
GOTERM_BP_DIRECT	GO:0030198~extracellular matrix organization	7	2.31023	0.115918	VWF, LAMB3, SERPINE1, ITGB4, LAMC1, SPP1, CYR61	284	196	16792	2.11167	1	0.950895	87.2741
KEGG_PATHWAY	hsa04512:ECM-receptor interaction	5	1.65017	0.132474	VWF, LAMB3, ITGB4, LAMC1, SPP1	156	87	6879	2.53426	1	0.937902	82.5157
KEGG_PATHWAY	hsa04151:PI3K-Akt signaling pathway	12	3.9604	0.154456	VWF, G6PC, LAMB3, GNG10, CHRM1, ITGB4, CSF3R, CREB5, LAMC1, RPS6, SPP1, F2R	156	345	6879	1.53378	1	0.947809	87.2394
KEGG_PATHWAY	hsa04510:Focal adhesion	5	1.65017	0.688037	VWF, LAMB3, ITGB4, LAMC1, SPP1	156	206	6879	1.07029	1	0.996637	99.9999
Annotation Cluster 12	Enrichment Score: 0.963705712280233
Category	Term	Count	%	PValue	Genes	List Total	Pop Hits	Pop Total	Fold Enrichment	Bonferroni	Benjamini	FDR
GOTERM_BP_DIRECT	GO:0010501~RNA secondary structure unwinding	4	1.32013	0.0377703	DDX56, DDX49, DDX24, DDX54	284	44	16792	5.37516	1	0.783563	47.4935
GOTERM_MF_DIRECT	GO:0004004~ATP-dependent RNA helicase activity	4	1.32013	0.0971464	DDX56, DDX49, DDX24, DDX54	286	65	16881	3.63228	1	0.89244	76.8506
UP_KEYWORDS	Helicase	4	1.32013	0.350192	DDX56, DDX49, DDX24, DDX54	303	143	20581	1.89997	1	0.901619	99.6957
Annotation Cluster 13	Enrichment Score: 0.9521064870123458
Category	Term	Count	%	PValue	Genes	List Total	Pop Hits	Pop Total	Fold Enrichment	Bonferroni	Benjamini	FDR
GOTERM_BP_DIRECT	GO:0007200~phospholipase C-activating G-protein coupled receptor signaling pathway	7	2.31023	0.000846062	GPR84, CCKAR, CYSLTR1, LTB4R, LTB4R2, FPR1, F2R	284	66	16792	6.27102	0.739671	0.0916533	1.40629
GOTERM_BP_DIRECT	GO:0007204~positive regulation of cytosolic calcium ion concentration	6	1.9802	0.0764836	CCKAR, CYSLTR1, FPR1, BDKRB2, ADCYAP1, F2R	284	134	16792	2.64747	1	0.891336	73.5879
KEGG_PATHWAY	hsa04080:Neuroactive ligand-receptor interaction	10	3.30033	0.172305	CCKAR, CHRM3, CYSLTR1, LTB4R, CHRM1, LTB4R2, GRM6, FPR1, BDKRB2, F2R	156	277	6879	1.59192	1	0.937564	90.1787
KEGG_PATHWAY	hsa04020:Calcium signaling pathway	7	2.31023	0.216252	CCKAR, CHRM3, CYSLTR1, CHRM1, LTB4R2, BDKRB2, F2R	156	179	6879	1.72443	1	0.931461	94.9718
UP_KEYWORDS	Transducer	16	5.28053	0.350922	CCKAR, GPR84, IRS2, GPRC5C, CYSLTR1, FPR1, GPR68, BDKRB2, GPR143, CHRM3, LTB4R, GNG10, CHRM1, GRM6, LTB4R2, F2R	303	899	20581	1.20888	1	0.898281	99.7003
UP_KEYWORDS	G-protein coupled receptor	14	4.62046	0.461693	GPR84, CCKAR, GPRC5C, CYSLTR1, CHRM3, LTB4R, CHRM1, LTB4R2, GRM6, FPR1, BDKRB2, GPR68, GPR143, F2R	303	842	20581	1.12938	1	0.944091	99.9758
GOTERM_BP_DIRECT	GO:0007186~G-protein coupled receptor signaling pathway	16	5.28053	0.553939	NPB, GPRC5C, FPR1, NPR1, GPR68, BDKRB2, GPR143, RGS16, CCL20, CHRM3, LTB4R, GNG10, CHRM1, TGM2, NMU, F2R	284	899	16792	1.05231	1	0.999896	99.9999
Annotation Cluster 14	Enrichment Score: 0.864746678866544
Category	Term	Count	%	PValue	Genes	List Total	Pop Hits	Pop Total	Fold Enrichment	Bonferroni	Benjamini	FDR
KEGG_PATHWAY	hsa00240:Pyrimidine metabolism	6	1.9802	0.0772126	POLD3, POLE4, POLR1B, DPYD, PNP, CANT1	156	101	6879	2.61957	0.999999	0.940901	62.6961
KEGG_PATHWAY	hsa00230:Purine metabolism	8	2.64026	0.102027	POLD3, POLE4, NUDT9, NPR1, POLR1B, PAICS, PNP, CANT1	156	176	6879	2.00437	1	0.933181	73.3019
UP_KEYWORDS	Nucleotidyltransferase	3	0.990099	0.323113	POLD3, POLE4, POLR1B	303	79	20581	2.5794	1	0.890714	99.4732
Annotation Cluster 15	Enrichment Score: 0.8406828828900149
Category	Term	Count	%	PValue	Genes	List Total	Pop Hits	Pop Total	Fold Enrichment	Bonferroni	Benjamini	FDR
GOTERM_BP_DIRECT	GO:0031167~rRNA methylation	3	0.990099	0.0257173	FBL, MRM2, TRMT61B	284	15	16792	11.8254	1	0.715015	35.3346
GOTERM_MF_DIRECT	GO:0008168~methyltransferase activity	4	1.32013	0.212056	PRDM1, CIAPIN1, FBL, MRM2	286	94	16881	2.51168	1	0.980644	96.7035
UP_KEYWORDS	S-adenosyl-L-methionine	5	1.65017	0.252742	SMYD1, PRDM1, FBL, MRM2, TRMT61B	303	174	20581	1.95184	1	0.855437	98.009
UP_KEYWORDS	Methyltransferase	5	1.65017	0.314713	SMYD1, PRDM1, FBL, MRM2, TRMT61B	303	193	20581	1.75969	1	0.891902	99.3782
Annotation Cluster 16	Enrichment Score: 0.6969919017466021
Category	Term	Count	%	PValue	Genes	List Total	Pop Hits	Pop Total	Fold Enrichment	Bonferroni	Benjamini	FDR
UP_KEYWORDS	Transit peptide	14	4.62046	0.0536743	PDK2, FASTKD1, GCAT, AASS, MTIF2, TRMT61B, MRM2, APOPT1, MRPL12, C1QBP, NUDT9, TDH, OAT, PRODH	303	536	20581	1.77414	1	0.416022	52.3661
GOTERM_CC_DIRECT	GO:0005759~mitochondrial matrix	9	2.9703	0.159019	PDK2, PYCR1, C1QBP, NUDT9, AASS, OAT, TRMT61B, RPS3, PRODH	294	327	18224	1.70605	1	0.777081	89.6038
UP_KEYWORDS	Mitochondrion	20	6.60066	0.290623	PDK2, FASTKD1, GCAT, AASS, MTIF2, CIAPIN1, MRM2, TRMT61B, RPS3, MFF, PYCR1, APOPT1, UQCR10, MRPL12, C1QBP, NUDT9, TDH, OAT, TRIM39, PRODH	303	1119	20581	1.21401	1	0.887673	99.0106
GOTERM_CC_DIRECT	GO:0005739~mitochondrion	21	6.93069	0.656881	PDK2, FASTKD1, GCAT, AASS, RPS15A, MTIF2, MRM2, TRMT61B, POLD3, PYCR1, APOPT1, MRPL12, HSPA2, C1QBP, NUDT9, TXNRD3, TGM2, PTS, OAT, TRIM39, PRODH	294	1331	18224	0.977997	1	0.995718	99.9999
Annotation Cluster 17	Enrichment Score: 0.6465571357383922
Category	Term	Count	%	PValue	Genes	List Total	Pop Hits	Pop Total	Fold Enrichment	Bonferroni	Benjamini	FDR
GOTERM_MF_DIRECT	GO:0004435~phosphatidylinositol phospholipase C activity	3	0.990099	0.0756329	CHRM3, CHRM1, BDKRB2	286	27	16881	6.55828	1	0.848551	67.5683
KEGG_PATHWAY	hsa04020:Calcium signaling pathway	7	2.31023	0.216252	CCKAR, CHRM3, CYSLTR1, CHRM1, LTB4R2, BDKRB2, F2R	156	179	6879	1.72443	1	0.931461	94.9718
KEGG_PATHWAY	hsa04810:Regulation of actin cytoskeleton	5	1.65017	0.702518	CHRM3, CHRM1, ITGB4, BDKRB2, F2R	156	210	6879	1.04991	1	0.996358	100
Annotation Cluster 18	Enrichment Score: 0.5862526850597249
Category	Term	Count	%	PValue	Genes	List Total	Pop Hits	Pop Total	Fold Enrichment	Bonferroni	Benjamini	FDR
GOTERM_CC_DIRECT	GO:0005887~integral component of plasma membrane	37	12.2112	0.00418289	TNFRSF6B, GPR84, CCKAR, SLC13A5, GPRC5C, SLC20A1, CYSLTR1, SGMS2, SLC15A2, JAG2, FPR1, BDKRB2, GPR68, HVCN1, AQP1, SLCO2A1, ACVR1B, RASGRP3, PRRG1, LTB4R, CSF3R, MRC1, ADAM23, SLC12A4, TGFBR2, LIFR, NPR1, CD163, BPI, SLC26A5, CHRM3, STAB1, CHRM1, GRM6, LTB4R2, HAS2, F2R	294	1415	18224	1.62085	0.663727	0.0700789	5.33157
UP_KEYWORDS	Glycoprotein	81	26.7327	0.0398588	CCKAR, GPR84, SLC13A5, PEAR1, SLC15A2, MMP9, GDF6, SLC9A3, JAG2, FSTL3, AQP1, MMP25, CANT1, CFHR1, CFP, ACVR1B, SERPINA9, HMCN1, LTB4R, LCAT, RSPO3, SERPINE1, CSF3R, LTF, TSKU, SLC12A8, KIAA1324L, LIFR, CHST2, CD163, INHBB, INHBA, G6PC, BPI, SLC26A5, KRT18, CHRM3, CHRM1, GRM6, CPXM1, LAMC1, EMP2, SEMA4A, TNFRSF6B, GPRC5C, CYSLTR1, ASTN1, ITGB4, FPR1, GPR68, BDKRB2, GREM1, GPR143, SYPL2, SLCO2A1, …	303	4551	20581	1.20893	0.999997	0.375011	42.1195
UP_KEYWORDS	Cell membrane	53	17.4917	0.213292	CCKAR, GPR84, PEAR1, SGMS2, SLC9A3, CRCP, HVCN1, AQP1, MMP25, SPRY4, CANT1, ACVR1B, LTB4R, IGFLR1, CSF3R, SLC51A, BCR, MAGI1, VANGL2, LIFR, CD163, SLC26A5, CHRM3, C1QBP, CHRM1, GRM6, SDCBP, EMP2, SEMA4A, GPRC5C, CYSLTR1, FPR1, ITGB4, ASTN1, BDKRB2, GPR68, RIMS2, GPR143, SLCO2A1, MRC1, RPSA, LPL, ADAM23, TGFBR2, GJB4, NTNG2, DSG3, GNG10, LTB4R2, ANTXR2, SELE, SYTL1, F2R	303	3175	20581	1.13385	1	0.810486	96.0241
GOTERM_CC_DIRECT	GO:0005886~plasma membrane	66	21.7822	0.59307	CCKAR, GPR84, SLC13A5, SGMS2, SLC20A1, SLC15A2, SLC9A3, JAG2, CRCP, HVCN1, AQP1, MMP25, CANT1, RPS3, ACVR1B, LTB4R, SERPINE1, CSF3R, IGFLR1, SLC51A, MT3, IRS2, MAGI1, STX2, VANGL2, LIFR, PDYN, CD163, C1QBP, CHRM3, CHRM1, SERBP1, GRM6, SDCBP, EMP2, UBA52, SEMA4A, CYSLTR1, TNFRSF12A, ITGB4, PAQR6, FPR1, GPR68, BDKRB2, GPR143, SLCO2A1, RASGRP3, TGM2, MRC1, RPSA, LPL, ADAM23, SLC12A4, TGFBR2, NPR1, R…	294	4121	18224	0.992745	1	0.992328	99.9992
UP_KEYWORDS	Transmembrane helix	68	22.4422	0.983799	CCKAR, GPR84, SLC13A5, PEAR1, SGMS2, SLC20A1, SLC15A2, SLC9A3, JAG2, HVCN1, AQP1, CANT1, ACVR1B, MFF, DKC1, LTB4R, LCAT, CSF3R, IGFLR1, SLC51A, ZDHHC1, SLC12A8, KIAA1324L, STX2, VANGL2, LIFR, CHST2, CD163, G6PC, BPI, SLC26A5, SEC61B, CHRM3, CHRM1, GRM6, SDCBP, HAS2, EMP2, SEMA4A, GPRC5C, CYSLTR1, TNFRSF12A, PAQR6, ITGB4, FPR1, ASTN1, GPR68, BDKRB2, GPR143, SYPL2, SLCO2A1, PRRG1, LFNG, MRC1, ADAM2…	303	5634	20581	0.819815	1	0.999969	100
UP_KEYWORDS	Transmembrane	68	22.4422	0.985039	CCKAR, GPR84, SLC13A5, PEAR1, SGMS2, SLC20A1, SLC15A2, SLC9A3, JAG2, HVCN1, AQP1, CANT1, ACVR1B, MFF, DKC1, LTB4R, LCAT, CSF3R, IGFLR1, SLC51A, ZDHHC1, SLC12A8, KIAA1324L, STX2, VANGL2, LIFR, CHST2, CD163, G6PC, BPI, SLC26A5, SEC61B, CHRM3, CHRM1, GRM6, SDCBP, HAS2, EMP2, SEMA4A, GPRC5C, CYSLTR1, TNFRSF12A, PAQR6, ITGB4, FPR1, ASTN1, GPR68, BDKRB2, GPR143, SYPL2, SLCO2A1, PRRG1, LFNG, MRC1, ADAM2…	303	5651	20581	0.817349	1	0.999972	100
UP_KEYWORDS	Membrane	86	28.3828	0.999103	CCKAR, GPR84, SLC13A5, PEAR1, SGMS2, SLC20A1, SLC15A2, SLC9A3, JAG2, CRCP, HVCN1, AQP1, SPRY4, MMP25, CANT1, RPS3, ACVR1B, MFF, UQCR10, SERPINA9, DKC1, LTB4R, LCAT, CSF3R, IGFLR1, SLC51A, ZDHHC1, SLC12A8, KIAA1324L, BCR, MAGI1, STX2, VANGL2, LIFR, CHST2, CD163, G6PC, BPI, SLC26A5, SEC61B, C1QBP, CHRM3, CHRM1, GRM6, SDCBP, HAS2, EMP2, SEMA4A, GPRC5C, CYSLTR1, TNFRSF12A, ASTN1, ITGB4, PAQR6, FPR1, …	303	7494	20581	0.779487	1	1	100
GOTERM_CC_DIRECT	GO:0016021~integral component of membrane	58	19.1419	0.999834	SLC13A5, PEAR1, SLC20A1, SGMS2, SLC15A2, SLC9A3, HVCN1, AQP1, MMP25, CANT1, MFF, DKC1, LTB4R, LCAT, IGFLR1, CSF3R, SLC51A, ZDHHC1, SLC12A8, KIAA1324L, STX2, VANGL2, CHST2, LIFR, CD163, BPI, G6PC, SEC61B, SLC26A5, SDCBP, EMP2, SEMA4A, GPRC5C, TNFRSF12A, FPR1, PAQR6, ASTN1, BDKRB2, GPR68, GPR143, SYPL2, SEC14L1, SLCO2A1, PRRG1, ADAM23, SLC12A4, TGFBR2, IDO2, GJB4, NPR1, TMEM39A, DSG3, STAB1, TMEM43…	294	5163	18224	0.696341	1	1	100
Annotation Cluster 19	Enrichment Score: 0.3458011205622332
Category	Term	Count	%	PValue	Genes	List Total	Pop Hits	Pop Total	Fold Enrichment	Bonferroni	Benjamini	FDR
KEGG_PATHWAY	hsa04910:Insulin signaling pathway	5	1.65017	0.377741	IRS2, G6PC, SOCS3, FBP1, RPS6	156	138	6879	1.59769	1	0.987654	99.7037
KEGG_PATHWAY	hsa04931:Insulin resistance	4	1.32013	0.441151	IRS2, G6PC, SOCS3, CREB5	156	108	6879	1.63319	1	0.983368	99.9208
KEGG_PATHWAY	hsa04920:Adipocytokine signaling pathway	3	0.990099	0.470772	IRS2, G6PC, SOCS3	156	70	6879	1.88984	1	0.981681	99.9594
KEGG_PATHWAY	hsa04152:AMPK signaling pathway	4	1.32013	0.527477	IRS2, G6PC, FBP1, CREB5	156	123	6879	1.43402	1	0.98943	99.9899
Annotation Cluster 20	Enrichment Score: 0.3379149485557751
Category	Term	Count	%	PValue	Genes	List Total	Pop Hits	Pop Total	Fold Enrichment	Bonferroni	Benjamini	FDR
GOTERM_CC_DIRECT	GO:0005882~intermediate filament	4	1.32013	0.273301	KRT18, KRT17, KRT8, TLK2	294	113	18224	2.19421	1	0.900306	98.4592
UP_KEYWORDS	Intermediate filament	3	0.990099	0.312319	KRT18, KRT17, KRT8	303	77	20581	2.64639	1	0.898798	99.3484
UP_KEYWORDS	Keratin	3	0.990099	0.65957	KRT18, KRT17, KRT8	303	153	20581	1.33184	1	0.976139	99.9999
GOTERM_MF_DIRECT	GO:0005198~structural molecule activity	4	1.32013	0.790385	LAMB3, KRT18, KRT17, KRT8	286	247	16881	0.955862	1	1	100
Annotation Cluster 21	Enrichment Score: 0.27585860066775914
Category	Term	Count	%	PValue	Genes	List Total	Pop Hits	Pop Total	Fold Enrichment	Bonferroni	Benjamini	FDR
UP_KEYWORDS	Extracellular matrix	7	2.31023	0.180283	VWF, MMP20, LAMB3, HMCN1, MMP9, LAMC1, MMP25	303	258	20581	1.8429	1	0.763646	93.0914
GOTERM_MF_DIRECT	GO:0004222~metalloendopeptidase activity	4	1.32013	0.298056	MMP20, ADAM23, MMP9, MMP25	286	113	16881	2.08936	1	0.995051	99.3699
UP_KEYWORDS	Metalloprotease	4	1.32013	0.386095	MMP20, MMP9, CPXM1, MMP25	303	152	20581	1.78748	1	0.920909	99.8583
UP_KEYWORDS	Zymogen	4	1.32013	0.610534	MMP20, PSMB7, MMP9, MMP25	303	214	20581	1.26961	1	0.966011	99.9997
GOTERM_CC_DIRECT	GO:0005578~proteinaceous extracellular matrix	5	1.65017	0.628064	VWF, MMP20, MMP9, MMP25, CYR61	294	268	18224	1.15646	1	0.99416	99.9998
UP_KEYWORDS	Protease	6	1.9802	0.904086	MMP20, PSMB7, MMP9, CPXM1, LTF, MMP25	303	544	20581	0.749163	1	0.998625	100
GOTERM_BP_DIRECT	GO:0006508~proteolysis	6	1.9802	0.927053	MMP20, ADAM23, MMP9, LTF, TNIP1, MMP25	284	500	16792	0.709521	1	1	100
GOTERM_MF_DIRECT	GO:0004252~serine-type endopeptidase activity	3	0.990099	0.931443	MMP20, MMP9, LTF	286	255	16881	0.694406	1	1	100
Annotation Cluster 22	Enrichment Score: 0.25320180340039794
Category	Term	Count	%	PValue	Genes	List Total	Pop Hits	Pop Total	Fold Enrichment	Bonferroni	Benjamini	FDR
UP_KEYWORDS	NADP	4	1.32013	0.513984	PYCR1, TXNRD3, AASS, DPYD	303	186	20581	1.46073	1	0.958022	99.9939
GOTERM_BP_DIRECT	GO:0055114~oxidation-reduction process	11	3.63036	0.542433	PYCR1, ALOXE3, HSD17B14, DOHH, STAB1, TXNRD3, IDO2, AASS, DPYD, PRODH, CBS	284	592	16792	1.09864	1	0.999869	99.9998
UP_KEYWORDS	Oxidoreductase	9	2.9703	0.623876	PYCR1, ALOXE3, HSD17B14, DOHH, TXNRD3, IDO2, AASS, DPYD, PRODH	303	582	20581	1.05037	1	0.968786	99.9998
Annotation Cluster 23	Enrichment Score: 0.2439691433608857
Category	Term	Count	%	PValue	Genes	List Total	Pop Hits	Pop Total	Fold Enrichment	Bonferroni	Benjamini	FDR
GOTERM_CC_DIRECT	GO:0030054~cell junction	9	2.9703	0.458031	MFF, BCR, HMCN1, MAGI1, CHRM3, CHRM1, ITGB4, TLK2, RIMS2	294	459	18224	1.21542	1	0.97537	99.9667
UP_KEYWORDS	Cell junction	11	3.63036	0.52467	MFF, BCR, HMCN1, MAGI1, CHRM3, DSG3, CHRM1, ITGB4, SDCBP, GJB4, RIMS2	303	675	20581	1.10691	1	0.958362	99.9955
UP_KEYWORDS	Synapse	5	1.65017	0.771456	MFF, BCR, CHRM3, CHRM1, RIMS2	303	357	20581	0.951318	1	0.990897	100
Annotation Cluster 24	Enrichment Score: 0.2153150310753709
Category	Term	Count	%	PValue	Genes	List Total	Pop Hits	Pop Total	Fold Enrichment	Bonferroni	Benjamini	FDR
UP_KEYWORDS	Immunity	9	2.9703	0.452089	CFP, C1QBP, IDO2, LTF, CRCP, PIBF1, PRDM1, SEMA4A, SEC14L1	303	500	20581	1.22263	1	0.941815	99.9693
UP_KEYWORDS	Innate immunity	5	1.65017	0.534998	CFP, C1QBP, CRCP, PRDM1, SEC14L1	303	261	20581	1.30123	1	0.958637	99.9966
GOTERM_BP_DIRECT	GO:0045087~innate immune response	5	1.65017	0.934282	C1QBP, CRCP, PRDM1, UBA52, SEC14L1	284	430	16792	0.68752	1	1	100
Annotation Cluster 25	Enrichment Score: 0.2035469386870714
Category	Term	Count	%	PValue	Genes	List Total	Pop Hits	Pop Total	Fold Enrichment	Bonferroni	Benjamini	FDR
UP_KEYWORDS	Nucleotide-binding	27	8.91089	0.549517	SEPHS2, MTIF2, BMS1, ACVR1B, HSPA2, SNRK, DDX49, KTI12, MAT1A, DDX24, NAT10, TLK2, TARSL2, CYR61, PDK2, CARS, GIMAP4, BCR, MAGI1, RASEF, TGFBR2, NPR1, DDX56, CCT4, DPYD, DDX54, PAICS	303	1788	20581	1.0257	1	0.955399	99.9978
UP_KEYWORDS	ATP-binding	21	6.93069	0.571053	PDK2, SEPHS2, CARS, BCR, MAGI1, TGFBR2, BMS1, ACVR1B, DDX56, CCT4, HSPA2, KTI12, SNRK, DDX49, MAT1A, DDX24, NAT10, TLK2, DDX54, TARSL2, PAICS	303	1391	20581	1.02545	1	0.958486	99.9989
GOTERM_MF_DIRECT	GO:0005524~ATP binding	23	7.59076	0.781091	PDK2, SEPHS2, CARS, BCR, MAGI1, TGFBR2, NPR1, BMS1, ACVR1B, DDX56, CCT4, HSPA2, KTI12, SNRK, DDX49, MAT1A, DDX24, TGM2, NAT10, TLK2, DDX54, TARSL2, PAICS	286	1495	16881	0.908069	1	1	100
Annotation Cluster 26	Enrichment Score: 0.1404887882526048
Category	Term	Count	%	PValue	Genes	List Total	Pop Hits	Pop Total	Fold Enrichment	Bonferroni	Benjamini	FDR
GOTERM_CC_DIRECT	GO:0045211~postsynaptic membrane	4	1.32013	0.662536	BCR, CHRM3, CHRM1, F2R	294	211	18224	1.1751	1	0.995623	99.9999
UP_KEYWORDS	Postsynaptic cell membrane	3	0.990099	0.741333	BCR, CHRM3, CHRM1	303	179	20581	1.13839	1	0.988215	100
UP_KEYWORDS	Synapse	5	1.65017	0.771456	MFF, BCR, CHRM3, CHRM1, RIMS2	303	357	20581	0.951318	1	0.990897	100
Annotation Cluster 27	Enrichment Score: 0.11857217742977529
Category	Term	Count	%	PValue	Genes	List Total	Pop Hits	Pop Total	Fold Enrichment	Bonferroni	Benjamini	FDR
GOTERM_MF_DIRECT	GO:0001078~transcriptional repressor activity, RNA polymerase II core promoter proximal region sequence-specific binding	3	0.990099	0.561779	KLF17, BHLHE40, PRDM1	286	111	16881	1.59526	1	0.999936	99.9993
UP_KEYWORDS	Repressor	8	2.64026	0.769129	IKZF4, SRSF6, ID1, KLF17, SMYD1, BHLHE40, PRDM1, YBX1	303	592	20581	0.917893	1	0.991041	100
GOTERM_BP_DIRECT	GO:0000122~negative regulation of transcription from RNA polymerase II promoter	11	3.63036	0.777182	ELP2, ZNF593, C1QBP, ID1, H2AFY2, SPDEF, KLF17, BHLHE40, PRDM1, UBA52, YBX1	284	720	16792	0.903326	1	1	100
GOTERM_MF_DIRECT	GO:0003700~transcription factor activity, sequence-specific DNA binding	7	2.31023	0.999136	IKZF4, ID1, KLF17, CREB5, BHLHE40, PRDM1, YBX1	286	961	16881	0.429939	1	1	100
Annotation Cluster 28	Enrichment Score: 0.09861598176562872
Category	Term	Count	%	PValue	Genes	List Total	Pop Hits	Pop Total	Fold Enrichment	Bonferroni	Benjamini	FDR
GOTERM_BP_DIRECT	GO:0006468~protein phosphorylation	8	2.64026	0.651605	ACVR1B, PDK2, FASTKD1, BCR, SNRK, TGFBR2, NPR1, TLK2	284	456	16792	1.03731	1	0.999981	100
GOTERM_BP_DIRECT	GO:0035556~intracellular signal transduction	7	2.31023	0.676923	BCR, SNRK, TUFT1, SDCBP, NPR1, TLK2, SCG2	284	403	16792	1.02702	1	0.99999	100
UP_KEYWORDS	Serine/threonine-protein kinase	5	1.65017	0.83143	ACVR1B, BCR, SNRK, TGFBR2, TLK2	303	393	20581	0.864174	1	0.996131	100
UP_KEYWORDS	Kinase	8	2.64026	0.917566	ACVR1B, PDK2, SEPHS2, BCR, SNRK, SGMS2, TGFBR2, TLK2	303	735	20581	0.73931	1	0.99892	100
GOTERM_MF_DIRECT	GO:0004674~protein serine/threonine kinase activity	4	1.32013	0.954845	ACVR1B, BCR, SNRK, TLK2	286	376	16881	0.62792	1	1	100
Annotation Cluster 29	Enrichment Score: 0.07290213515025454
Category	Term	Count	%	PValue	Genes	List Total	Pop Hits	Pop Total	Fold Enrichment	Bonferroni	Benjamini	FDR
GOTERM_MF_DIRECT	GO:0046872~metal ion binding	34	11.2211	0.664467	GTF3A, ALOXE3, MLPH, DZIP1, NT5DC2, NUFIP1, RPL37, RIMS2, CIAPIN1, ACVR1B, MAT1A, TGM2, PTS, LFNG, MT3, IKZF4, CARS, ZNF593, TGFBR2, IDO2, FBP1, KLF17, SMYD1, CREB5, KLF15, POLR1B, RPE, PLEKHF2, DOHH, ANTXR2, DPYD, PRDM1, CBS, ZNHIT3	286	2069	16881	0.969953	1	0.999995	100
UP_KEYWORDS	Metal-binding	48	15.8416	0.853681	GTF3A, ALOXE3, MLPH, DZIP1, MMP9, NT5DC2, NUFIP1, RPL37, RIMS2, CIAPIN1, MMP25, CANT1, ACVR1B, MMP20, RPS27, RASGRP3, SNRK, MAT1A, TGM2, LTF, PTS, LFNG, MT3, IKZF4, CARS, ZNF593, RASEF, TGFBR2, FBP1, IDO2, KLF17, CREB5, SMYD1, KLF15, POLR1B, LHPP, QPCT, RPE, PLEKHF2, DOHH, DSG3, CPXM1, ANTXR2, DPYD, PRDM1, TRIM39, CBS, ZNHIT3	303	3640	20581	0.895702	1	0.997202	100
UP_KEYWORDS	Zinc	28	9.24092	0.930514	GTF3A, MLPH, DZIP1, MMP9, NUFIP1, RPL37, RIMS2, MMP25, RPS27, MMP20, RASGRP3, PTS, MT3, IKZF4, ZNF593, CARS, KLF17, SMYD1, CREB5, POLR1B, KLF15, QPCT, RPE, PLEKHF2, CPXM1, PRDM1, TRIM39, ZNHIT3	303	2348	20581	0.809998	1	0.999279	100
UP_KEYWORDS	Zinc-finger	19	6.27063	0.968054	IKZF4, GTF3A, ZNF593, MLPH, DZIP1, NUFIP1, KLF17, RPL37, CREB5, SMYD1, KLF15, POLR1B, RIMS2, RPS27, PLEKHF2, RASGRP3, PRDM1, TRIM39, ZNHIT3	303	1781	20581	0.724625	1	0.999861	100
Annotation Cluster 30	Enrichment Score: 0.03712657396489267
Category	Term	Count	%	PValue	Genes	List Total	Pop Hits	Pop Total	Fold Enrichment	Bonferroni	Benjamini	FDR
UP_KEYWORDS	Activator	8	2.64026	0.855907	CEBPZ, RFX1, PPRC1, SPDEF, KLF17, CREB5, KLF15, YBX1	303	661	20581	0.822077	1	0.997172	100
GOTERM_MF_DIRECT	GO:0001077~transcriptional activator activity, RNA polymerase II core promoter proximal region sequence-specific binding	3	0.990099	0.910674	CEBPZ, KLF15, YBX1	286	236	16881	0.750311	1	1	100
GOTERM_BP_DIRECT	GO:0006366~transcription from RNA polymerase II promoter	4	1.32013	0.992729	CEBPZ, CREB5, KLF15, YBX1	284	513	16792	0.461027	1	1	100
Annotation Cluster 31	Enrichment Score: 0.0016037970112184826
Category	Term	Count	%	PValue	Genes	List Total	Pop Hits	Pop Total	Fold Enrichment	Bonferroni	Benjamini	FDR
UP_KEYWORDS	Transcription	24	7.92079	0.992002	IKZF4, GTF3A, ZNF593, ELP2, FSTL3, CRCP, KLF17, CREB5, SMYD1, KLF15, POLR1B, YBX1, RPS3, C1QBP, ID1, CEBPZ, RFX1, PPRC1, SPDEF, LTF, BHLHE40, PRDM1, EEF1D, DDX54	303	2398	20581	0.679807	1	0.999992	100
UP_KEYWORDS	Transcription regulation	22	7.26073	0.996099	IKZF4, GTF3A, ELP2, ZNF593, FSTL3, KLF17, CREB5, SMYD1, KLF15, YBX1, RPS3, C1QBP, ID1, CEBPZ, RFX1, PPRC1, SPDEF, LTF, BHLHE40, PRDM1, EEF1D, DDX54	303	2332	20581	0.640793	1	0.999998	100
UP_KEYWORDS	DNA-binding	18	5.94059	0.997599	GTF3A, IKZF4, ZNF593, KLF17, CREB5, SMYD1, KLF15, YBX1, RPS3, POLE4, H2AFY2, RFX1, SPDEF, LTF, BHLHE40, PRDM1, EEF1D, RBMS1	303	2050	20581	0.596407	1	0.999999	100
GOTERM_BP_DIRECT	GO:0006351~transcription, DNA-templated	18	5.94059	0.999572	IKZF4, ZNF593, FSTL3, KLF17, CRCP, SMYD1, POLR1B, RPS3, C1QBP, ID1, RFX1, SPDEF, PPRC1, LTF, BHLHE40, PRDM1, EEF1D, DDX54	284	1955	16792	0.54439	1	1	100

## Sheet: Protein vs Cellulose down
Annotation Cluster 1	Enrichment Score: 2.2686755046465468
Category	Term	Count	%	PValue	Genes	List Total	Pop Hits	Pop Total	Fold Enrichment	Bonferroni	Benjamini	FDR
GOTERM_CC_DIRECT	GO:0005886~plasma membrane	70	32.5581	0.000344281	PVR, ACOX1, GNA15, KCNK18, ATP10D, MFSD2A, IGHM, CXADR, SLC26A2, ACVR1C, CHIC2, SLC24A3, SEMA7A, ANO9, RECK, HYAL2, TRPM6, ARHGEF1, INPPL1, EFNB2, RFTN1, SLC9A3R2, CD38, RASGRF2, GNAQ, GNB1, ARRB1, IGSF3, RAB17, VAMP5, SORT1, SEMA4B, EFNA5, AOC3, ARL4A, PHLPP1, TNF, SLC39A10, ARHGAP35, AFAP1L2, CYTH3, STUB1, PXN, LLGL2, PLPP2, SLC11A2, SLC11A1, CHD9, EXOC6, NDRG1, VMP1, TMPRSS2, VAV3, BAIAP2L1, A…	210	4121	18224	1.47408	0.0777326	0.0777326	0.441995
UP_KEYWORDS	Cell membrane	48	22.3256	0.00684141	PVR, PHLPP1, TNF, CPEB3, BLK, CPEB4, KCNK18, ARHGAP35, MFSD2A, ATP10D, CYTH3, IGHM, CXADR, SLC11A2, CHIC2, GCOM1, PDE4A, SEMA7A, NDRG1, VMP1, RASA3, ANO9, RECK, TMPRSS2, TRPM6, HYAL2, GJD3, PDE4D, ATP11C, KCNK1, RFTN1, SLC9A3R2, ADI1, LAMP2, RASGRF2, PTP4A3, ARRB1, CD59, CD58, SLC6A6, VAMP5, SORT1, EFNA5, SCN8A, PERP, ATP6V0A2, ARL4A, AOC3	215	3175	20581	1.44719	0.803479	0.117638	8.46349
UP_KEYWORDS	Membrane	90	41.8605	0.0663612	PVR, CPEB3, ATL1, SGPP1, CPEB4, KCNK18, ATP10D, MFSD2A, IGHM, CXADR, SLC26A2, ACVR1C, CHIC2, SLC25A25, GCOM1, SLC24A3, PDE4A, SEMA7A, RNF148, ANO9, RECK, TRPM6, HYAL2, GJD3, ARHGEF1, LPGAT1, INPPL1, STK24, EFNB2, PDE4D, RFTN1, RNF223, LPIN2, SLC9A3R2, SH2D3C, CD38, TMEM135, RASGRF2, GNAQ, CCND2, ARRB1, CLIC5, RAB17, IGSF3, VAMP5, SEMA4B, SORT1, KDSR, EFNA5, INPP4B, MGAT5, AOC3, ARL4A, PHLPP1, HS3…	215	7494	20581	1.14963	1	0.398636	58.7094
Annotation Cluster 2	Enrichment Score: 2.230026965461218
Category	Term	Count	%	PValue	Genes	List Total	Pop Hits	Pop Total	Fold Enrichment	Bonferroni	Benjamini	FDR
GOTERM_MF_DIRECT	GO:0005089~Rho guanyl-nucleotide exchange factor activity	6	2.7907	0.00196985	VAV3, ARHGEF1, RASGRF2, ARHGEF19, ITSN2, FGD6	196	77	16881	6.71124	0.590666	0.360208	2.7612
GOTERM_BP_DIRECT	GO:0035023~regulation of Rho protein signal transduction	6	2.7907	0.00268972	VAV3, ARHGEF1, RASGRF2, ARHGEF19, ITSN2, FGD6	199	81	16792	6.25051	0.972408	0.401237	4.3153
UP_KEYWORDS	Guanine-nucleotide releasing factor	7	3.25581	0.0047258	VAV3, ARHGEF1, RASGRF2, ARHGEF19, CYTH3, FGD6, DENND1B	215	149	20581	4.49717	0.67459	0.117275	5.91965
GOTERM_MF_DIRECT	GO:0005085~guanyl-nucleotide exchange factor activity	5	2.32558	0.0480039	SH2D3C, VAV3, RASGRF2, FGD6, FNIP1	196	118	16881	3.64947	1	0.751624	50.2709
Annotation Cluster 3	Enrichment Score: 1.6107996291500972
Category	Term	Count	%	PValue	Genes	List Total	Pop Hits	Pop Total	Fold Enrichment	Bonferroni	Benjamini	FDR
GOTERM_BP_DIRECT	GO:0000122~negative regulation of transcription from RNA polymerase II promoter	22	10.2326	0.000123647	ZBTB7A, TNF, CPEB3, YY1, KLF11, ZHX1, CBX4, ZHX3, NFIX, ARHGAP35, NFKB1, CTCF, SOX6, FOXO3, FNIP1, HIC1, HES1, NCOA2, SP3, BCL11A, SKIL, TCF25	199	720	16792	2.57834	0.151964	0.0791113	0.202318
UP_KEYWORDS	Repressor	18	8.37209	0.00016159	ZBTB7A, NACC1, CPEB3, YY1, KLF11, ZHX1, CBX4, ZHX3, ARHGAP35, CTCF, WTIP, TRIM24, HIC1, LSM14A, HES1, SP3, BCL11A, TCF25	215	592	20581	2.91058	0.0375758	0.00763073	0.207957
UP_KEYWORDS	Transcription regulation	38	17.6744	0.00584131	ZBTB10, CBX4, SOX5, ZNF827, NFIX, ARHGAP35, NFKB1, CTCF, WTIP, SOX6, FOXO3, MYT1, HIC1, CHD9, CDCA7, ZNF512B, BCL11A, KDM3B, TCF25, ZBTB7A, NACC1, EGR3, EGR2, TFPT, YY1, ZHX1, KLF11, AFF4, NR4A1, ZHX3, TBX1, TRIM24, LPIN2, HES1, NCOA2, ARRB1, SP3, CLOCK	215	2332	20581	1.55985	0.750538	0.109261	7.26897
GOTERM_BP_DIRECT	GO:0045892~negative regulation of transcription, DNA-templated	14	6.51163	0.00636345	ZBTB7A, NACC1, TNF, KLF11, ZHX1, CBX4, ZHX3, CTCF, ARHGAP35, TRIM24, HES1, CD38, SP3, CLOCK	199	499	16792	2.36743	0.999798	0.480342	9.9274
UP_KEYWORDS	Transcription	38	17.6744	0.00904067	ZBTB10, CBX4, SOX5, ZNF827, NFIX, ARHGAP35, NFKB1, CTCF, WTIP, SOX6, FOXO3, MYT1, HIC1, CHD9, CDCA7, ZNF512B, BCL11A, KDM3B, TCF25, ZBTB7A, NACC1, EGR3, EGR2, TFPT, YY1, ZHX1, KLF11, AFF4, NR4A1, ZHX3, TBX1, TRIM24, LPIN2, HES1, NCOA2, ARRB1, SP3, CLOCK	215	2398	20581	1.51692	0.883793	0.133672	11.0405
GOTERM_MF_DIRECT	GO:0003700~transcription factor activity, sequence-specific DNA binding	20	9.30233	0.0156606	EGR3, EGR2, YY1, KLF11, ZHX1, AFF4, SOX5, ZHX3, NFIX, NFKB1, CTCF, TBX1, FOXO3, SOX6, MYT1, MSRB2, HIC1, HES1, TCF25, CLOCK	196	961	16881	1.79246	0.999215	0.477973	20.0803
UP_KEYWORDS	Activator	13	6.04651	0.044075	EGR2, CPEB3, YY1, KLF11, SOX5, NFIX, CTCF, NFKB1, FOXO3, SOX6, NCOA2, SP3, CLOCK	215	661	20581	1.88265	0.999977	0.326768	44.0469
GOTERM_BP_DIRECT	GO:0006366~transcription from RNA polymerase II promoter	11	5.11628	0.0828775	EGR2, ARRB1, KLF11, AFF4, SOX5, NFIX, NFKB1, CTCF, FOXO3, TRIM24, CLOCK	199	513	16792	1.80936	1	0.948026	75.7545
UP_KEYWORDS	Nucleus	64	29.7674	0.105494	CPEB3, FAM110C, ZNF827, CBX4, CTCF, NFKB1, FOXO3, CDCA7, RBM47, USP15, IP6K2, EGR3, EGR2, TFPT, STK24, YY1, ZHX1, FAM192A, ZHX3, LPIN2, SLC9A3R2, HES1, TRIM35, NCOA2, GNAQ, ARRB1, CCND2, SORT1, KPNA3, CLOCK, FBXL3, ARL4A, PHLPP1, ZBTB10, SOX5, ARHGAP35, NFIX, SOX6, WTIP, DAZAP2, MYT1, STUB1, HIC1, WAPL, CHD9, TRIM66, ZNF512B, BCL11A, DYRK3, NDRG1, KDM3B, TCF25, UNKL, ZBTB7A, NACC1, KLF11, AFF4, N…	215	5244	20581	1.16828	1	0.466921	76.2147
GOTERM_BP_DIRECT	GO:0006351~transcription, DNA-templated	30	13.9535	0.114362	ZBTB10, ZNF827, CBX4, NFIX, ARHGAP35, SOX6, WTIP, MYT1, HIC1, CHD9, CDCA7, ZNF512B, BCL11A, KDM3B, TCF25, ZBTB7A, EGR3, NACC1, EGR2, TFPT, YY1, ZHX1, NR4A1, ZHX3, TBX1, LPIN2, HES1, NCOA2, SP3, CLOCK	199	1955	16792	1.29486	1	0.952854	86.3178
UP_KEYWORDS	DNA-binding	27	12.5581	0.167636	ZBTB10, SOX5, ZNF827, NFIX, ARHGAP35, NFKB1, CTCF, FOXO3, SOX6, MYT1, HIC1, CHD9, ZNF512B, TCF25, ZBTB7A, EGR3, EGR2, YY1, ZHX1, KLF11, NR4A1, ZHX3, TBX1, TRIM24, HES1, SP3, CLOCK	215	2050	20581	1.26078	1	0.553044	90.592
GOTERM_MF_DIRECT	GO:0003677~DNA binding	23	10.6977	0.29322	ZBTB7A, EGR3, EGR2, TFPT, ZBTB10, YY1, ZHX1, ZNF827, SOX5, ZHX3, NR4A1, NFIX, ARHGAP35, NFKB1, TBX1, FOXO3, SOX6, MYT1, HES1, CHD9, ZNF512B, TCF25, CLOCK	196	1674	16881	1.18335	1	0.985719	99.276
GOTERM_CC_DIRECT	GO:0005634~nucleus	67	31.1628	0.299923	ACOX1, CPEB3, CPEB4, ZNF827, CBX4, CTCF, NFKB1, FOXO3, CDCA7, TUBB6, RBM47, USP15, IP6K2, EGR3, EGR2, TFPT, CSNK1G2, STK24, YY1, ZHX1, FAM192A, ZHX3, LPIN2, SLC9A3R2, HES1, CD38, TRIM35, NCOA2, ARRB1, CCND2, CLIC5, KPNA3, CLOCK, FBXL3, MAP7D3, ARL4A, PHLPP1, SOX5, ARHGAP35, NFIX, SOX6, WTIP, DAZAP2, MYT1, SLC11A2, WAPL, CHD9, ZNF512B, BCL11A, DYRK3, NDRG1, KDM3B, SKIL, TCF25, UNKL, ZBTB7A, NACC1,…	210	5415	18224	1.07374	1	0.857536	98.9817
GOTERM_BP_DIRECT	GO:0006355~regulation of transcription, DNA-templated	20	9.30233	0.411419	EGR3, EGR2, TFPT, ZBTB10, ZNF827, AFF4, SOX5, WTIP, SOX6, MYT1, MSRB2, HIC1, HES1, CHD9, NCOA2, ZNF512B, CDCA7, SP3, KDM3B, CLOCK	199	1504	16792	1.1221	1	0.999146	99.983
Annotation Cluster 4	Enrichment Score: 1.6088209434569862
Category	Term	Count	%	PValue	Genes	List Total	Pop Hits	Pop Total	Fold Enrichment	Bonferroni	Benjamini	FDR
UP_KEYWORDS	Lipid transport	6	2.7907	0.00329656	COL4A3BP, ATP11B, MFSD2A, ATP10D, ATP11C, ANO9	215	96	20581	5.98285	0.542773	0.0931896	4.16437
GOTERM_MF_DIRECT	GO:0004012~phospholipid-translocating ATPase activity	3	1.39535	0.0110263	ATP11B, ATP10D, ATP11C	196	14	16881	18.4559	0.993413	0.512041	14.5679
GOTERM_BP_DIRECT	GO:0045332~phospholipid translocation	3	1.39535	0.0273725	ATP11B, ATP10D, ATP11C	199	22	16792	11.5066	1	0.828252	36.5273
GOTERM_MF_DIRECT	GO:0000287~magnesium ion binding	6	2.7907	0.0880265	CSNK1G2, ATP11B, ATP10D, DYRK3, ATP11C, BPNT1	196	204	16881	2.53316	1	0.862988	72.9772
GOTERM_BP_DIRECT	GO:0034220~ion transmembrane transport	6	2.7907	0.103151	GJD3, ATP11B, ATP10D, ATP11C, ANO9, ATP6V0A2	199	210	16792	2.41091	1	0.948267	83.1876
Annotation Cluster 5	Enrichment Score: 1.4839016045221023
Category	Term	Count	%	PValue	Genes	List Total	Pop Hits	Pop Total	Fold Enrichment	Bonferroni	Benjamini	FDR
UP_KEYWORDS	Metal-binding	54	25.1163	0.00548757	PHLPP1, GNA15, ZBTB10, PRSS1, ZNF827, CTCF, ATP10D, ITSN2, WTIP, MMP28, MYT1, PXN, ACVR1C, HIC1, TRIM66, ZNF512B, SLC25A25, PDE4A, BCL11A, DYRK3, KDM3B, RNF148, RASA3, BPNT1, FGD6, UNKL, MGAT4B, ZBTB7A, EGR3, TRPM6, EGR2, NUDT19, VAV3, STK24, YY1, SCD, KLF11, ZHX1, ATP11B, NR4A1, ZHX3, PDE4D, ATP11C, TRIM24, RNF223, MSRB2, GTSF1, ADI1, TRIM35, GNAQ, SP3, CAPN14, TRIM39, AOC3	215	3640	20581	1.4201	0.728593	0.111799	6.84303
UP_KEYWORDS	Zinc-finger	28	13.0233	0.0304166	ZBTB10, ZNF827, CTCF, MYT1, HIC1, TRIM66, ZNF512B, BCL11A, KDM3B, RNF148, RASA3, FGD6, UNKL, ZBTB7A, EGR3, VAV3, EGR2, YY1, KLF11, ZHX1, NR4A1, ZHX3, TRIM24, RNF223, GTSF1, TRIM35, SP3, TRIM39	215	1781	20581	1.50495	0.999338	0.30652	32.8273
UP_KEYWORDS	Zinc	34	15.814	0.0445362	ZBTB10, SLC39A10, ZNF827, CTCF, WTIP, MMP28, MYT1, PXN, HIC1, TRIM66, ZNF512B, BCL11A, KDM3B, RNF148, RASA3, FGD6, UNKL, ZBTB7A, TRPM6, EGR3, VAV3, EGR2, YY1, ZHX1, KLF11, NR4A1, ZHX3, TRIM24, RNF223, MSRB2, GTSF1, TRIM35, SP3, TRIM39	215	2348	20581	1.38615	0.99998	0.319971	44.3936
GOTERM_MF_DIRECT	GO:0046872~metal ion binding	30	13.9535	0.156023	PHLPP1, GNA15, ZBTB10, PRSS1, ZNF827, ACVR1C, HIC1, DDHD1, ZNF512B, PDE4A, BCL11A, KDM3B, RASA3, FGD6, MGAT4B, ZBTB7A, TRPM6, EGR3, VAV3, NUDT19, EGR2, STK24, YY1, ZHX1, KLF11, ZHX3, PDE4D, GTSF1, GNAQ, SP3	196	2069	16881	1.24883	1	0.935712	91.0079
Annotation Cluster 6	Enrichment Score: 1.2884771341516006
Category	Term	Count	%	PValue	Genes	List Total	Pop Hits	Pop Total	Fold Enrichment	Bonferroni	Benjamini	FDR
UP_KEYWORDS	Differentiation	15	6.97674	0.0102118	ZBTB7A, YY1, ZHX1, EFNB2, ZHX3, CDC20, ITSN2, MYT1, GTSF1, NAV1, SEMA7A, VAMP5, SORT1, SEMA4B, EFNA5	215	667	20581	2.15275	0.912196	0.141047	12.3854
UP_KEYWORDS	Neurogenesis	7	3.25581	0.04692	NAV1, SEMA7A, EFNB2, SEMA4B, EFNA5, CDC20, MYT1	215	250	20581	2.68032	0.999989	0.324794	46.1545
UP_KEYWORDS	Developmental protein	13	6.04651	0.284516	LSM14A, ZBTB7A, NAV1, SEMA7A, EFNB2, VAMP5, SEMA4B, SORT1, EFNA5, TBX1, SOX6, MYT1, HIC1	215	949	20581	1.31131	1	0.704982	98.6604
Annotation Cluster 7	Enrichment Score: 1.2473536703369614
Category	Term	Count	%	PValue	Genes	List Total	Pop Hits	Pop Total	Fold Enrichment	Bonferroni	Benjamini	FDR
KEGG_PATHWAY	hsa04062:Chemokine signaling pathway	10	4.65116	0.000864899	CCL11, VAV3, CCL2, CXCL14, GNB1, ARRB1, CXCL8, NFKB1, FOXO3, PXN	94	186	6879	3.93445	0.150865	0.150865	1.06873
GOTERM_BP_DIRECT	GO:0030593~neutrophil chemotaxis	6	2.7907	0.0010813	CCL11, VAV3, CCL2, CXCL8, PDE4D, CXADR	199	66	16792	7.67108	0.763582	0.302699	1.75632
GOTERM_BP_DIRECT	GO:0071347~cellular response to interleukin-1	6	2.7907	0.0015024	CCL11, HYAL2, CCL2, YY1, CXCL8, NFKB1	199	71	16792	7.13087	0.865233	0.330243	2.43242
GOTERM_MF_DIRECT	GO:0008009~chemokine activity	4	1.86047	0.0189492	CCL11, CCL2, CXCL14, CXCL8	196	49	16881	7.03082	0.999828	0.514315	23.7893
GOTERM_BP_DIRECT	GO:0071356~cellular response to tumor necrosis factor	5	2.32558	0.0412454	CCL11, HYAL2, CCL2, CD58, CXCL8	199	110	16792	3.83554	1	0.894162	49.8347
GOTERM_BP_DIRECT	GO:0050729~positive regulation of inflammatory response	4	1.86047	0.055102	CCL11, HYAL2, CCL2, CLOCK	199	73	16792	4.62367	1	0.905674	60.4768
GOTERM_BP_DIRECT	GO:0070374~positive regulation of ERK1 and ERK2 cascade	6	2.7907	0.0565491	CCL11, TNF, CCL2, ARRB1, SEMA7A, PTPN11	199	175	16792	2.89309	1	0.904761	61.4566
UP_KEYWORDS	Inflammatory response	5	2.32558	0.0744023	CCL11, CCL2, TOLLIP, SEMA7A, CXCL8	215	152	20581	3.14887	1	0.3989	63.0632
UP_KEYWORDS	Chemotaxis	4	1.86047	0.0804871	CCL11, CCL2, CXCL14, CXCL8	215	97	20581	3.94745	1	0.415784	66.0718
GOTERM_BP_DIRECT	GO:0006955~immune response	9	4.18605	0.123166	CCL11, SLC11A1, TNF, CCL2, CXCL14, COL4A3BP, SEMA7A, CXCL8, ATP6V0A2	199	421	16792	1.80389	1	0.961014	88.3829
BBID	109.Chemokine_families	3	1.39535	0.124027	CCL11, CCL2, CXCL8	10	27	388	4.31111	0.994992	0.929236	70.2255
UP_KEYWORDS	Cytokine	5	2.32558	0.136647	CCL11, TNF, CCL2, CXCL14, CXCL8	215	190	20581	2.51909	1	0.530936	84.9341
GOTERM_BP_DIRECT	GO:0006935~chemotaxis	4	1.86047	0.174551	CCL11, CCL2, CXCL14, CXCL8	199	122	16792	2.76662	1	0.9816	95.6794
GOTERM_BP_DIRECT	GO:0070098~chemokine-mediated signaling pathway	3	1.39535	0.20414	CCL11, CCL2, CXCL8	199	71	16792	3.56543	1	0.986252	97.6238
KEGG_PATHWAY	hsa04060:Cytokine-cytokine receptor interaction	5	2.32558	0.417898	CCL11, TNF, CCL2, CXCL14, CXCL8	94	243	6879	1.50578	1	0.912402	99.8793
GOTERM_BP_DIRECT	GO:0007186~G-protein coupled receptor signaling pathway	6	2.7907	0.983005	CCL11, GNA15, CCL2, GNAQ, CXCL8, SORT1	199	899	16792	0.563172	1	1	100
GOTERM_CC_DIRECT	GO:0005576~extracellular region	10	4.65116	0.996177	CCL11, TNF, CCL2, CXCL14, PRSS1, CXCL8, EFNA5, FIBIN, CXADR, IGFBP5	210	1610	18224	0.539012	1	1	100
Annotation Cluster 8	Enrichment Score: 1.2152159467777686
Category	Term	Count	%	PValue	Genes	List Total	Pop Hits	Pop Total	Fold Enrichment	Bonferroni	Benjamini	FDR
UP_KEYWORDS	Neurodegeneration	8	3.72093	0.0339767	GBA2, DDHD1, EGR2, CCDC88C, ATL1, NDRG1, FIG4, STUB1	215	293	20581	2.61367	0.999723	0.299663	35.9361
UP_KEYWORDS	Neuropathy	4	1.86047	0.0675208	EGR2, ATL1, NDRG1, FIG4	215	90	20581	4.25447	1	0.394723	59.3651
UP_KEYWORDS	Charcot-Marie-Tooth disease	3	1.39535	0.0985674	EGR2, NDRG1, FIG4	215	51	20581	5.63092	1	0.451101	73.7299
Annotation Cluster 9	Enrichment Score: 1.1890030282363913
Category	Term	Count	%	PValue	Genes	List Total	Pop Hits	Pop Total	Fold Enrichment	Bonferroni	Benjamini	FDR
KEGG_PATHWAY	hsa05142:Chagas disease (American trypanosomiasis)	7	3.25581	0.00272121	GNA15, TNF, CCL2, GNAQ, CXCL8, NFKB1, PPP2R2C	94	104	6879	4.92563	0.402505	0.227022	3.32714
GOTERM_BP_DIRECT	GO:0006954~inflammatory response	10	4.65116	0.0356285	CCL11, SLC11A1, TNF, CCL2, TOLLIP, SEMA7A, CXCL8, NFKB1, AFAP1L2, AOC3	199	379	16792	2.22644	1	0.866677	44.7983
KEGG_PATHWAY	hsa04621:NOD-like receptor signaling pathway	4	1.86047	0.0396334	TNF, CCL2, CXCL8, NFKB1	94	56	6879	5.2272	0.999521	0.720252	39.4789
GOTERM_BP_DIRECT	GO:0071222~cellular response to lipopolysaccharide	5	2.32558	0.0447883	TNF, CCL2, CXCL8, NFKB1, PDE4D	199	113	16792	3.73371	1	0.869455	52.7861
BBID	18.Cytokine_astocytes	3	1.39535	0.0485109	TNF, CCL2, CXCL8	10	16	388	7.275	0.863179	0.863179	36.5523
GOTERM_BP_DIRECT	GO:0070374~positive regulation of ERK1 and ERK2 cascade	6	2.7907	0.0565491	CCL11, TNF, CCL2, ARRB1, SEMA7A, PTPN11	199	175	16792	2.89309	1	0.904761	61.4566
UP_KEYWORDS	Inflammatory response	5	2.32558	0.0744023	CCL11, CCL2, TOLLIP, SEMA7A, CXCL8	215	152	20581	3.14887	1	0.3989	63.0632
KEGG_PATHWAY	hsa05164:Influenza A	6	2.7907	0.0860478	TMPRSS2, TNF, CCL2, PRSS1, CXCL8, NFKB1	94	174	6879	2.52348	1	0.81742	67.2843
KEGG_PATHWAY	hsa05323:Rheumatoid arthritis	4	1.86047	0.115945	TNF, CCL2, CXCL8, ATP6V0A2	94	88	6879	3.3264	1	0.879659	78.3534
GOTERM_BP_DIRECT	GO:0006955~immune response	9	4.18605	0.123166	CCL11, SLC11A1, TNF, CCL2, CXCL14, COL4A3BP, SEMA7A, CXCL8, ATP6V0A2	199	421	16792	1.80389	1	0.961014	88.3829
UP_KEYWORDS	Cytokine	5	2.32558	0.136647	CCL11, TNF, CCL2, CXCL14, CXCL8	215	190	20581	2.51909	1	0.530936	84.9341
KEGG_PATHWAY	hsa05144:Malaria	3	1.39535	0.141636	TNF, CCL2, CXCL8	94	49	6879	4.48046	1	0.872777	84.9911
KEGG_PATHWAY	hsa04060:Cytokine-cytokine receptor interaction	5	2.32558	0.417898	CCL11, TNF, CCL2, CXCL14, CXCL8	94	243	6879	1.50578	1	0.912402	99.8793
Annotation Cluster 10	Enrichment Score: 1.178004650151629
Category	Term	Count	%	PValue	Genes	List Total	Pop Hits	Pop Total	Fold Enrichment	Bonferroni	Benjamini	FDR
GOTERM_MF_DIRECT	GO:0003924~GTPase activity	7	3.25581	0.0545824	GNA15, DNM1L, GNAQ, GNB1, ATL1, RAB17, TUBB6	196	234	16881	2.57647	1	0.775899	54.9343
UP_KEYWORDS	GTP-binding	8	3.72093	0.0687389	GNA15, DNM1L, GNAQ, ATL1, RAB17, TUBB6, SEPT6, ARL4A	215	343	20581	2.23267	1	0.391291	60.0437
GOTERM_MF_DIRECT	GO:0005525~GTP binding	9	4.18605	0.0779347	GNA15, DNM1L, GNAQ, ATL1, RAB17, TUBB6, ARHGAP35, SEPT6, ARL4A	196	384	16881	2.01861	1	0.840833	68.4063
Annotation Cluster 11	Enrichment Score: 1.1421360644056697
Category	Term	Count	%	PValue	Genes	List Total	Pop Hits	Pop Total	Fold Enrichment	Bonferroni	Benjamini	FDR
GOTERM_MF_DIRECT	GO:0045499~chemorepellent activity	3	1.39535	0.0385674	SEMA7A, SEMA4B, EFNA5	196	27	16881	9.56973	1	0.719907	42.7942
UP_KEYWORDS	Neurogenesis	7	3.25581	0.04692	NAV1, SEMA7A, EFNB2, SEMA4B, EFNA5, CDC20, MYT1	215	250	20581	2.68032	0.999989	0.324794	46.1545
GOTERM_BP_DIRECT	GO:0050919~negative chemotaxis	3	1.39535	0.0606662	SEMA7A, SEMA4B, EFNA5	199	34	16792	7.44546	1	0.914023	64.1208
KEGG_PATHWAY	hsa04360:Axon guidance	4	1.86047	0.245998	SEMA7A, EFNB2, SEMA4B, EFNA5	94	127	6879	2.30491	1	0.861449	96.9992
Annotation Cluster 12	Enrichment Score: 1.1072572484945107
Category	Term	Count	%	PValue	Genes	List Total	Pop Hits	Pop Total	Fold Enrichment	Bonferroni	Benjamini	FDR
GOTERM_BP_DIRECT	GO:0046718~viral entry into host cell	5	2.32558	0.0147869	PVR, HYAL2, EFNB2, KPNA3, CXADR	199	80	16792	5.27387	1	0.689051	21.6504
GOTERM_MF_DIRECT	GO:0001618~virus receptor activity	4	1.86047	0.0472965	PVR, HYAL2, EFNB2, CXADR	196	70	16881	4.92157	1	0.768514	49.7436
UP_KEYWORDS	Host cell receptor for virus entry	3	1.39535	0.143106	PVR, EFNB2, CXADR	215	64	20581	4.48714	1	0.519078	86.3232
UP_KEYWORDS	Host-virus interaction	6	2.7907	0.372055	PVR, WAPL, EFNB2, KPNA3, SEPT6, CXADR	215	385	20581	1.49183	1	0.756784	99.7506
Annotation Cluster 13	Enrichment Score: 1.0407540378867337
Category	Term	Count	%	PValue	Genes	List Total	Pop Hits	Pop Total	Fold Enrichment	Bonferroni	Benjamini	FDR
KEGG_PATHWAY	hsa04142:Lysosome	6	2.7907	0.0235946	SLC11A2, SLC11A1, LAMP2, SORT1, ABCA2, ATP6V0A2	94	121	6879	3.6288	0.989033	0.777822	25.6588
GOTERM_CC_DIRECT	GO:0031902~late endosome membrane	5	2.32558	0.0289927	SLC11A2, SLC11A1, LAMP2, SNX16, FIG4	210	101	18224	4.29609	0.999006	0.536163	31.5103
GOTERM_CC_DIRECT	GO:0005764~lysosome	7	3.25581	0.0462128	SLC11A2, SLC11A1, LAMP2, HYAL2, SNX16, ABCA2, ENGASE	210	226	18224	2.68791	0.999985	0.636077	45.5929
GOTERM_CC_DIRECT	GO:0005770~late endosome	5	2.32558	0.0519838	SLC11A2, SLC11A1, LAMP2, SNX16, VAMP5	210	122	18224	3.5566	0.999996	0.591835	49.6792
UP_KEYWORDS	Lysosome	4	1.86047	0.509358	LAMP2, SNX16, SORT1, ABCA2	215	263	20581	1.4559	1	0.849848	99.9896
GOTERM_MF_DIRECT	GO:0005215~transporter activity	3	1.39535	0.680333	SLC11A2, SLC11A1, ABCA2	196	202	16881	1.27912	1	0.999902	100
Annotation Cluster 14	Enrichment Score: 0.9851198865933911
Category	Term	Count	%	PValue	Genes	List Total	Pop Hits	Pop Total	Fold Enrichment	Bonferroni	Benjamini	FDR
KEGG_PATHWAY	hsa05142:Chagas disease (American trypanosomiasis)	7	3.25581	0.00272121	GNA15, TNF, CCL2, GNAQ, CXCL8, NFKB1, PPP2R2C	94	104	6879	4.92563	0.402505	0.227022	3.32714
BIOCARTA	h_freePathway:Free Radical Induced Apoptosis	3	1.39535	0.0192091	TNF, CXCL8, NFKB1	37	10	1625	13.1757	0.894594	0.527624	19.8513
KEGG_PATHWAY	hsa04621:NOD-like receptor signaling pathway	4	1.86047	0.0396334	TNF, CCL2, CXCL8, NFKB1	94	56	6879	5.2272	0.999521	0.720252	39.4789
GOTERM_BP_DIRECT	GO:0071222~cellular response to lipopolysaccharide	5	2.32558	0.0447883	TNF, CCL2, CXCL8, NFKB1, PDE4D	199	113	16792	3.73371	1	0.869455	52.7861
KEGG_PATHWAY	hsa05146:Amoebiasis	5	2.32558	0.0548529	GNA15, TNF, GNAQ, CXCL8, NFKB1	94	106	6879	3.45193	0.999977	0.781986	50.3686
KEGG_PATHWAY	hsa04071:Sphingolipid signaling pathway	5	2.32558	0.0788844	TNF, GNAQ, SGPP1, NFKB1, PPP2R2C	94	120	6879	3.0492	1	0.821928	63.9537
KEGG_PATHWAY	hsa05164:Influenza A	6	2.7907	0.0860478	TMPRSS2, TNF, CCL2, PRSS1, CXCL8, NFKB1	94	174	6879	2.52348	1	0.81742	67.2843
BIOCARTA	h_nthiPathway:NFkB activation by Nontypeable Hemophilus influenzae	3	1.39535	0.0971416	TNF, CXCL8, NFKB1	37	24	1625	5.48986	0.999993	0.861331	68.8346
KEGG_PATHWAY	hsa05161:Hepatitis B	5	2.32558	0.132531	EGR3, TNF, EGR2, CXCL8, NFKB1	94	145	6879	2.52348	1	0.873437	82.89
KEGG_PATHWAY	hsa05134:Legionellosis	3	1.39535	0.165261	TNF, CXCL8, NFKB1	94	54	6879	4.0656	1	0.881609	89.3871
KEGG_PATHWAY	hsa04620:Toll-like receptor signaling pathway	4	1.86047	0.172475	TNF, TOLLIP, CXCL8, NFKB1	94	106	6879	2.76154	1	0.878124	90.4716
KEGG_PATHWAY	hsa04668:TNF signaling pathway	4	1.86047	0.175823	TNF, CCL2, DNM1L, NFKB1	94	107	6879	2.73573	1	0.868716	90.9394
KEGG_PATHWAY	hsa05168:Herpes simplex infection	5	2.32558	0.234545	TNF, CCL2, NFKB1, CLOCK, PTPN11	94	183	6879	1.99948	1	0.878139	96.3814
KEGG_PATHWAY	hsa04622:RIG-I-like receptor signaling pathway	3	1.39535	0.244246	TNF, CXCL8, NFKB1	94	70	6879	3.13632	1	0.869407	96.9115
KEGG_PATHWAY	hsa05160:Hepatitis C	4	1.86047	0.267913	TNF, CXCL8, NFKB1, PPP2R2C	94	133	6879	2.20093	1	0.859801	97.9195
KEGG_PATHWAY	hsa05133:Pertussis	3	1.39535	0.269402	TNF, CXCL8, NFKB1	94	75	6879	2.92723	1	0.85247	97.9714
KEGG_PATHWAY	hsa04064:NF-kappa B signaling pathway	3	1.39535	0.329557	TNF, CXCL8, NFKB1	94	87	6879	2.52348	1	0.884561	99.3021
KEGG_PATHWAY	hsa04932:Non-alcoholic fatty liver disease (NAFLD)	3	1.39535	0.610014	TNF, CXCL8, NFKB1	94	151	6879	1.45392	1	0.958333	99.9992
Annotation Cluster 15	Enrichment Score: 0.9507980291041139
Category	Term	Count	%	PValue	Genes	List Total	Pop Hits	Pop Total	Fold Enrichment	Bonferroni	Benjamini	FDR
BIOCARTA	h_vipPathway:Neuropeptides VIP and PACAP inhibit the apoptosis of activated T cells	4	1.86047	0.0183005	EGR3, EGR2, GNAQ, NFKB1	37	26	1625	6.75676	0.882641	0.657424	19
KEGG_PATHWAY	hsa05161:Hepatitis B	5	2.32558	0.132531	EGR3, TNF, EGR2, CXCL8, NFKB1	94	145	6879	2.52348	1	0.873437	82.89
KEGG_PATHWAY	hsa05203:Viral carcinogenesis	6	2.7907	0.143698	EGR3, EGR2, CCND2, NFKB1, CDC20, PXN	94	205	6879	2.14188	1	0.858389	85.4329
KEGG_PATHWAY	hsa05166:HTLV-I infection	5	2.32558	0.451415	TNF, EGR2, CCND2, NFKB1, CDC20	94	254	6879	1.44057	1	0.915153	99.9422
Annotation Cluster 16	Enrichment Score: 0.9098215467020707
Category	Term	Count	%	PValue	Genes	List Total	Pop Hits	Pop Total	Fold Enrichment	Bonferroni	Benjamini	FDR
UP_KEYWORDS	Nucleotide-binding	28	13.0233	0.0317397	GNA15, ATL1, BLK, ABCA2, ATP10D, TK2, ACVR1C, CHD9, SLK, TUBB6, DYRK3, UCK2, IP6K2, TRPM6, DNM1L, CSNK1G2, STK24, MYO1D, ATP11B, ATP11C, ABCG5, TTLL10, GNAQ, RAB17, SCN8A, SEPT6, SRMS, ARL4A	215	1788	20581	1.49906	0.999521	0.305118	33.9985
UP_KEYWORDS	ATP-binding	20	9.30233	0.135755	TRPM6, CSNK1G2, STK24, BLK, MYO1D, ATP11B, ABCA2, ATP10D, ATP11C, TK2, ACVR1C, CHD9, ABCG5, TTLL10, SLK, DYRK3, UCK2, SCN8A, SRMS, IP6K2	215	1391	20581	1.37636	1	0.536245	84.7323
UP_KEYWORDS	Kinase	12	5.5814	0.145506	TRPM6, DOK2, SLK, CSNK1G2, STK24, BLK, DYRK3, UCK2, SRMS, TK2, ACVR1C, IP6K2	215	735	20581	1.56287	1	0.518444	86.8087
GOTERM_MF_DIRECT	GO:0005524~ATP binding	20	9.30233	0.365994	TRPM6, CSNK1G2, STK24, BLK, MYO1D, ATP11B, ABCA2, ATP10D, ATP11C, TK2, ACVR1C, CHD9, ABCG5, TTLL10, SLK, DYRK3, UCK2, SCN8A, SRMS, IP6K2	196	1495	16881	1.15221	1	0.993493	99.8452
Annotation Cluster 17	Enrichment Score: 0.8930575489382879
Category	Term	Count	%	PValue	Genes	List Total	Pop Hits	Pop Total	Fold Enrichment	Bonferroni	Benjamini	FDR
GOTERM_BP_DIRECT	GO:0030168~platelet activation	6	2.7907	0.0117046	GNA15, VAV3, GNAQ, GNB1, ARRB1, PTPN11	199	115	16792	4.40253	1	0.648759	17.5377
GOTERM_MF_DIRECT	GO:0003924~GTPase activity	7	3.25581	0.0545824	GNA15, DNM1L, GNAQ, GNB1, ATL1, RAB17, TUBB6	196	234	16881	2.57647	1	0.775899	54.9343
GOTERM_MF_DIRECT	GO:0004871~signal transducer activity	4	1.86047	0.419448	GNA15, GNAQ, GNB1, TOLLIP	196	204	16881	1.68878	1	0.996748	99.9557
UP_KEYWORDS	Transducer	3	1.39535	0.99927	GNA15, GNAQ, GNB1	215	899	20581	0.31944	1	1	100
Annotation Cluster 18	Enrichment Score: 0.8424726786300358
Category	Term	Count	%	PValue	Genes	List Total	Pop Hits	Pop Total	Fold Enrichment	Bonferroni	Benjamini	FDR
BIOCARTA	h_myosinPathway:PKC-catalyzed phosphorylation of inhibitory phosphoprotein of myosin phosphatase	3	1.39535	0.0418176	ARHGEF1, GNAQ, GNB1	37	15	1625	8.78378	0.992953	0.710268	38.575
BIOCARTA	h_par1pathway:Thrombin signaling and protease-activated receptors	3	1.39535	0.0902702	ARHGEF1, GNAQ, GNB1	37	23	1625	5.72855	0.999983	0.88863	66.0188
KEGG_PATHWAY	hsa05200:Pathways in cancer	5	2.32558	0.786462	ARHGEF1, GNAQ, GNB1, CXCL8, NFKB1	94	393	6879	0.931054	1	0.993469	100
Annotation Cluster 19	Enrichment Score: 0.5615135647884165
Category	Term	Count	%	PValue	Genes	List Total	Pop Hits	Pop Total	Fold Enrichment	Bonferroni	Benjamini	FDR
GOTERM_BP_DIRECT	GO:0023014~signal transduction by protein phosphorylation	3	1.39535	0.0948735	SLK, STK24, ACVR1C	199	44	16792	5.75331	1	0.951192	80.4575
GOTERM_MF_DIRECT	GO:0004702~receptor signaling protein serine/threonine kinase activity	3	1.39535	0.124979	SLK, STK24, ACVR1C	196	53	16881	4.87514	1	0.911002	84.9811
GOTERM_BP_DIRECT	GO:0006468~protein phosphorylation	8	3.72093	0.292828	CCL11, TRPM6, CCL2, CSNK1G2, STK24, COL4A3BP, DYRK3, ACVR1C	199	456	16792	1.48038	1	0.996169	99.6568
GOTERM_BP_DIRECT	GO:0046777~protein autophosphorylation	4	1.86047	0.332568	SLK, CSNK1G2, STK24, TRIM24	199	172	16792	1.96237	1	0.997322	99.8669
UP_KEYWORDS	Serine/threonine-protein kinase	6	2.7907	0.385343	TRPM6, SLK, CSNK1G2, STK24, DYRK3, ACVR1C	215	393	20581	1.46146	1	0.759257	99.8107
GOTERM_MF_DIRECT	GO:0004674~protein serine/threonine kinase activity	6	2.7907	0.440747	TRPM6, SLK, CSNK1G2, STK24, DYRK3, ACVR1C	196	376	16881	1.37438	1	0.99673	99.9739
GOTERM_MF_DIRECT	GO:0004672~protein kinase activity	5	2.32558	0.598265	CCL2, CSNK1G2, STK24, COL4A3BP, DYRK3	196	359	16881	1.19955	1	0.999645	99.9998
Annotation Cluster 20	Enrichment Score: 0.5358231857993178
Category	Term	Count	%	PValue	Genes	List Total	Pop Hits	Pop Total	Fold Enrichment	Bonferroni	Benjamini	FDR
KEGG_PATHWAY	hsa05168:Herpes simplex infection	5	2.32558	0.234545	TNF, CCL2, NFKB1, CLOCK, PTPN11	94	183	6879	1.99948	1	0.878139	96.3814
KEGG_PATHWAY	hsa04920:Adipocytokine signaling pathway	3	1.39535	0.244246	TNF, NFKB1, PTPN11	94	70	6879	3.13632	1	0.869407	96.9115
KEGG_PATHWAY	hsa04931:Insulin resistance	3	1.39535	0.430999	TNF, NFKB1, PTPN11	94	108	6879	2.0328	1	0.911264	99.909
Annotation Cluster 21	Enrichment Score: 0.5119764732900897
Category	Term	Count	%	PValue	Genes	List Total	Pop Hits	Pop Total	Fold Enrichment	Bonferroni	Benjamini	FDR
GOTERM_BP_DIRECT	GO:0098609~cell-cell adhesion	6	2.7907	0.216332	SLK, STK24, BAIAP2L1, NDRG1, PERP, SLC9A3R2	199	271	16792	1.86823	1	0.987613	98.1546
GOTERM_CC_DIRECT	GO:0005913~cell-cell adherens junction	6	2.7907	0.312105	PVR, SLK, STK24, BAIAP2L1, NDRG1, SLC9A3R2	210	323	18224	1.61203	1	0.864412	99.1875
GOTERM_MF_DIRECT	GO:0098641~cadherin binding involved in cell-cell adhesion	5	2.32558	0.431171	SLK, STK24, BAIAP2L1, NDRG1, SLC9A3R2	196	290	16881	1.48496	1	0.996998	99.9668
Annotation Cluster 22	Enrichment Score: 0.4924397283448357
Category	Term	Count	%	PValue	Genes	List Total	Pop Hits	Pop Total	Fold Enrichment	Bonferroni	Benjamini	FDR
GOTERM_BP_DIRECT	GO:0006813~potassium ion transport	3	1.39535	0.251944	SLC24A3, KCNK18, KCNK1	199	82	16792	3.08714	1	0.992992	99.1385
UP_KEYWORDS	Potassium transport	3	1.39535	0.340186	SLC24A3, KCNK18, KCNK1	215	116	20581	2.47566	1	0.731235	99.5281
UP_KEYWORDS	Potassium	3	1.39535	0.388741	SLC24A3, KCNK18, KCNK1	215	129	20581	2.22618	1	0.758932	99.8237
Annotation Cluster 23	Enrichment Score: 0.4258846859074161
Category	Term	Count	%	PValue	Genes	List Total	Pop Hits	Pop Total	Fold Enrichment	Bonferroni	Benjamini	FDR
GOTERM_MF_DIRECT	GO:0016874~ligase activity	6	2.7907	0.201176	EGR2, CBX4, TRIM24, STUB1, UNKL, TRIM39	196	270	16881	1.91395	1	0.958402	95.8813
UP_KEYWORDS	Ubl conjugation pathway	10	4.65116	0.276905	EGR2, CBX4, USP46, CDC20, TRIM24, USP15, STUB1, FBXL3, UNKL, TRIM39	215	680	20581	1.40773	1	0.698988	98.4647
UP_KEYWORDS	Ligase	6	2.7907	0.294755	EGR2, CBX4, TRIM24, STUB1, UNKL, TRIM39	215	347	20581	1.6552	1	0.709242	98.8874
GOTERM_BP_DIRECT	GO:0016567~protein ubiquitination	5	2.32558	0.614472	ARRB1, TRIM24, STUB1, FBXL3, TRIM39	199	359	16792	1.17524	1	0.999975	100
GOTERM_MF_DIRECT	GO:0004842~ubiquitin-protein transferase activity	4	1.86047	0.73571	TRIM24, STUB1, FBXL3, UNKL	196	329	16881	1.04714	1	0.999969	100
Annotation Cluster 24	Enrichment Score: 0.41036971421991647
Category	Term	Count	%	PValue	Genes	List Total	Pop Hits	Pop Total	Fold Enrichment	Bonferroni	Benjamini	FDR
KEGG_PATHWAY	hsa04670:Leukocyte transendothelial migration	4	1.86047	0.203228	VAV3, ARHGAP35, PXN, PTPN11	94	115	6879	2.54542	1	0.857973	94.0463
KEGG_PATHWAY	hsa04510:Focal adhesion	4	1.86047	0.531072	VAV3, CCND2, ARHGAP35, PXN	94	206	6879	1.42099	1	0.932833	99.9918
KEGG_PATHWAY	hsa04810:Regulation of actin cytoskeleton	4	1.86047	0.544195	VAV3, ARHGEF1, ARHGAP35, PXN	94	210	6879	1.39392	1	0.936067	99.9942
Annotation Cluster 25	Enrichment Score: 0.3605834852096066
Category	Term	Count	%	PValue	Genes	List Total	Pop Hits	Pop Total	Fold Enrichment	Bonferroni	Benjamini	FDR
UP_KEYWORDS	Cell junction	10	4.65116	0.266864	DNM1L, GJD3, GCOM1, CPEB3, CPEB4, WTIP, PERP, KCNK1, CXADR, PXN	215	675	20581	1.41816	1	0.688946	98.1663
GOTERM_CC_DIRECT	GO:0030054~cell junction	7	3.25581	0.430777	DNM1L, GCOM1, CPEB3, CPEB4, PERP, KCNK1, CXADR	210	459	18224	1.32346	1	0.917789	99.9289
UP_KEYWORDS	Synapse	4	1.86047	0.720621	DNM1L, CPEB3, CPEB4, KCNK1	215	357	20581	1.07256	1	0.946825	100
Annotation Cluster 26	Enrichment Score: 0.331705405501979
Category	Term	Count	%	PValue	Genes	List Total	Pop Hits	Pop Total	Fold Enrichment	Bonferroni	Benjamini	FDR
UP_KEYWORDS	Membrane	90	41.8605	0.0663612	PVR, CPEB3, ATL1, SGPP1, CPEB4, KCNK18, ATP10D, MFSD2A, IGHM, CXADR, SLC26A2, ACVR1C, CHIC2, SLC25A25, GCOM1, SLC24A3, PDE4A, SEMA7A, RNF148, ANO9, RECK, TRPM6, HYAL2, GJD3, ARHGEF1, LPGAT1, INPPL1, STK24, EFNB2, PDE4D, RFTN1, RNF223, LPIN2, SLC9A3R2, SH2D3C, CD38, TMEM135, RASGRF2, GNAQ, CCND2, ARRB1, CLIC5, RAB17, IGSF3, VAMP5, SEMA4B, SORT1, KDSR, EFNA5, INPP4B, MGAT5, AOC3, ARL4A, PHLPP1, HS3…	215	7494	20581	1.14963	1	0.398636	58.7094
UP_KEYWORDS	Glycoprotein	48	22.3256	0.548163	PVR, HS3ST6, CCL2, TNF, SLC39A10, KCNK18, MFSD2A, ABCA2, MMP28, IGHM, CXADR, SLC26A2, ABI3BP, PLPP2, SLC11A2, SLC11A1, REG1A, WISP1, SLC24A3, SEMA7A, FIBIN, RNF148, ANO9, RECK, MGAT4B, TMPRSS2, HYAL2, DNM1L, SLAMF9, EFNB2, CILP, KCNK1, CCL11, CD38, LAMP2, ABCG5, CD59, CD58, IGSF3, SLC6A6, SORT1, SEMA4B, EFNA5, SCN8A, MGAT5, ATP6V0A2, IGFBP5, AOC3	215	4551	20581	1.00963	1	0.870818	99.9964
UP_KEYWORDS	Transmembrane helix	55	25.5814	0.781926	PVR, ATL1, SGPP1, KCNK18, ATP10D, MFSD2A, IGHM, CXADR, SLC26A2, ACVR1C, SLC25A25, SLC24A3, RNF148, ANO9, TRPM6, GJD3, LPGAT1, EFNB2, RNF223, CD38, TMEM135, CLIC5, IGSF3, VAMP5, SORT1, SEMA4B, INPP4B, EFNA5, KDSR, MGAT5, AOC3, HS3ST6, TNF, SLC39A10, ABCA2, PLPP2, SLC11A2, SLC11A1, VMP1, MS4A4A, MGAT4B, TMPRSS2, SLAMF9, SCD, ATP11B, ATP11C, FIG4, KCNK1, LAMP2, ABCG5, CD58, SLC6A6, SCN8A, PERP, ATP6…	215	5634	20581	0.934488	1	0.967854	100
UP_KEYWORDS	Transmembrane	55	25.5814	0.789798	PVR, ATL1, SGPP1, KCNK18, ATP10D, MFSD2A, IGHM, CXADR, SLC26A2, ACVR1C, SLC25A25, SLC24A3, RNF148, ANO9, TRPM6, GJD3, LPGAT1, EFNB2, RNF223, CD38, TMEM135, CLIC5, IGSF3, VAMP5, SORT1, SEMA4B, INPP4B, EFNA5, KDSR, MGAT5, AOC3, HS3ST6, TNF, SLC39A10, ABCA2, PLPP2, SLC11A2, SLC11A1, VMP1, MS4A4A, MGAT4B, TMPRSS2, SLAMF9, SCD, ATP11B, ATP11C, FIG4, KCNK1, LAMP2, ABCG5, CD58, SLC6A6, SCN8A, PERP, ATP6…	215	5651	20581	0.931677	1	0.969414	100
GOTERM_CC_DIRECT	GO:0016021~integral component of membrane	48	22.3256	0.977163	PVR, HS3ST6, TNF, SGPP1, ATL1, SLC39A10, MFSD2A, ATP10D, ABCA2, IGHM, SLC26A2, PLPP2, SLC11A2, SLC11A1, SLC25A25, SULT1A1, VMP1, RNF148, ANO9, MGAT4B, MS4A4A, TMPRSS2, TRPM6, LPGAT1, SLAMF9, SCD, ATP11B, ATP11C, RNF223, FIG4, KCNK1, GBA2, CD38, LAMP2, TMEM135, ABCG5, CD58, IGSF3, SLC6A6, SORT1, SEMA4B, KDSR, EFNA5, INPP4B, SCN8A, MGAT5, ATP6V0A2, AOC3	210	5163	18224	0.806796	1	0.999995	100
Annotation Cluster 27	Enrichment Score: 0.24811717692324137
Category	Term	Count	%	PValue	Genes	List Total	Pop Hits	Pop Total	Fold Enrichment	Bonferroni	Benjamini	FDR
UP_KEYWORDS	Cell division	6	2.7907	0.37429	WAPL, CDCA7, CCND2, CDC20, SEPT6, LLGL2	215	388	20581	1.48029	1	0.750681	99.7618
GOTERM_BP_DIRECT	GO:0051301~cell division	5	2.32558	0.594431	WAPL, CDCA7, CCND2, CDC20, LLGL2	199	350	16792	1.20546	1	0.999969	100
UP_KEYWORDS	Cell cycle	6	2.7907	0.809728	WAPL, CDCA7, CCND2, CDC20, SEPT6, LLGL2	215	650	20581	0.883621	1	0.974657	100
Annotation Cluster 28	Enrichment Score: 0.23975578330876796
Category	Term	Count	%	PValue	Genes	List Total	Pop Hits	Pop Total	Fold Enrichment	Bonferroni	Benjamini	FDR
UP_KEYWORDS	Oxidoreductase	8	3.72093	0.402287	ADI1, ACOX1, SCD, KDSR, KDM3B, AKR1D1, MSRB2, AOC3	215	582	20581	1.31582	1	0.769965	99.8679
GOTERM_MF_DIRECT	GO:0016491~oxidoreductase activity	3	1.39535	0.675038	ADI1, SCD, KDSR	196	200	16881	1.29191	1	0.999905	100
GOTERM_BP_DIRECT	GO:0055114~oxidation-reduction process	7	3.25581	0.70286	ADI1, SCD, KDSR, KDM3B, AKR1D1, MSRB2, AOC3	199	592	16792	0.997759	1	0.999997	100
Annotation Cluster 29	Enrichment Score: 0.2040430801595188
Category	Term	Count	%	PValue	Genes	List Total	Pop Hits	Pop Total	Fold Enrichment	Bonferroni	Benjamini	FDR
GOTERM_CC_DIRECT	GO:0005615~extracellular space	17	7.90698	0.479656	PVR, TNF, CCL2, CILP, CXCL8, CXADR, IGHM, ABI3BP, CCL11, LAMP2, WISP1, CXCL14, CD59, SEMA7A, SEMA4B, WFDC1, KDSR	210	1347	18224	1.09523	1	0.932342	99.9776
UP_KEYWORDS	Glycoprotein	48	22.3256	0.548163	PVR, HS3ST6, CCL2, TNF, SLC39A10, KCNK18, MFSD2A, ABCA2, MMP28, IGHM, CXADR, SLC26A2, ABI3BP, PLPP2, SLC11A2, SLC11A1, REG1A, WISP1, SLC24A3, SEMA7A, FIBIN, RNF148, ANO9, RECK, MGAT4B, TMPRSS2, HYAL2, DNM1L, SLAMF9, EFNB2, CILP, KCNK1, CCL11, CD38, LAMP2, ABCG5, CD59, CD58, IGSF3, SLC6A6, SORT1, SEMA4B, EFNA5, SCN8A, MGAT5, ATP6V0A2, IGFBP5, AOC3	215	4551	20581	1.00963	1	0.870818	99.9964
UP_KEYWORDS	Disulfide bond	35	16.2791	0.651593	PVR, HS3ST6, CCL2, TNF, PRSS1, CXCL8, MMP28, IGHM, CXADR, REG1A, WISP1, SEMA7A, FGL1, FIBIN, RECK, TMPRSS2, HYAL2, SLAMF9, EFNB2, CILP, KCNK1, CCL11, CD38, LAMP2, PTP4A3, CXCL14, CD59, CD58, IGSF3, SORT1, SEMA4B, WFDC1, EFNA5, IGFBP5, AOC3	215	3434	20581	0.975654	1	0.923936	99.9999
UP_KEYWORDS	Secreted	20	9.30233	0.66516	PVR, TMPRSS2, TNF, CCL2, PRSS1, CILP, CXCL8, MMP28, CXADR, IGHM, ABI3BP, CCL11, REG1A, WISP1, CXCL14, CD59, WFDC1, FGL1, FIBIN, IGFBP5	215	1965	20581	0.974306	1	0.92714	99.9999
UP_KEYWORDS	Signal	39	18.1395	0.83761	PVR, CCL2, SLC39A10, PRSS1, CXCL8, MMP28, CXADR, ABI3BP, PLPP2, ACVR1C, REG1A, WISP1, GCOM1, SLC24A3, SEMA7A, FGL1, FIBIN, RNF148, RECK, MGAT4B, HYAL2, SLAMF9, EFNB2, CILP, MSRB2, ADI1, CCL11, LAMP2, CXCL14, CD59, CD58, IGSF3, SLC6A6, SORT1, WFDC1, SEMA4B, EFNA5, KDSR, IGFBP5	215	4160	20581	0.897427	1	0.980088	100
Annotation Cluster 30	Enrichment Score: 0.03904931951192586
Category	Term	Count	%	PValue	Genes	List Total	Pop Hits	Pop Total	Fold Enrichment	Bonferroni	Benjamini	FDR
GOTERM_MF_DIRECT	GO:0000166~nucleotide binding	4	1.86047	0.769537	CPEB3, CPEB4, RBM47, ABCA2	196	348	16881	0.989972	1	0.999987	100
UP_KEYWORDS	RNA-binding	3	1.39535	0.992981	CPEB3, CPEB4, RBM47	215	665	20581	0.431845	1	0.999967	100
GOTERM_MF_DIRECT	GO:0044822~poly(A) RNA binding	5	2.32558	0.999267	LSM14A, ARHGEF1, CPEB3, CPEB4, RBM47	196	1129	16881	0.381433	1	1	100

## Sheet: Lipid vs Cellulose up
Annotation Cluster 1	Enrichment Score: 3.388898162068602
Category	Term	Count	%	PValue	Genes	List Total	Pop Hits	Pop Total	Fold Enrichment	Bonferroni	Benjamini	FDR
GOTERM_BP_DIRECT	GO:0006364~rRNA processing	10	9.17431	4.81034e-06	RPS18, TBL3, RPL31, RPLP1, RPS12, RPLP2, RPL24, RPL37, FBL, MRM2	100	214	16792	7.84673	0.00344788	0.00344788	0.00727869
GOTERM_BP_DIRECT	GO:0006413~translational initiation	8	7.33945	1.64468e-05	EIF6, RPS18, RPL31, RPLP1, RPS12, RPLP2, RPL24, RPL37	100	137	16792	9.80555	0.0117395	0.00588706	0.0248842
GOTERM_BP_DIRECT	GO:0006614~SRP-dependent cotranslational protein targeting to membrane	7	6.42202	1.93084e-05	RPS18, RPL31, RPLP1, RPS12, RPLP2, RPL24, RPL37	100	94	16792	12.5047	0.0137679	0.00461053	0.0292132
GOTERM_BP_DIRECT	GO:0019083~viral transcription	7	6.42202	5.20979e-05	RPS18, RPL31, RPLP1, RPS12, RPLP2, RPL24, RPL37	100	112	16792	10.495	0.0367162	0.00930822	0.0788048
GOTERM_BP_DIRECT	GO:0000184~nuclear-transcribed mRNA catabolic process, nonsense-mediated decay	7	6.42202	7.3104e-05	RPS18, RPL31, RPLP1, RPS12, RPLP2, RPL24, RPL37	100	119	16792	9.87765	0.0511368	0.0104432	0.110563
UP_KEYWORDS	Ribosomal protein	7	6.42202	0.000435826	RPS18, RPL31, RPLP1, RPS12, RPLP2, RPL24, RPL37	109	185	20581	7.14441	0.0866825	0.0866825	0.548381
KEGG_PATHWAY	hsa03010:Ribosome	7	6.42202	0.000463653	RPS18, RPL31, RPLP1, RPS12, RPLP2, RPL24, RPL37	52	136	6879	6.80896	0.0641665	0.0641665	0.54772
GOTERM_CC_DIRECT	GO:0022625~cytosolic large ribosomal subunit	5	4.58716	0.000572296	RPL31, RPLP1, RPLP2, RPL24, RPL37	103	68	18224	13.0097	0.0738413	0.0376286	0.668013
GOTERM_BP_DIRECT	GO:0006412~translation	8	7.33945	0.000743749	RPS18, RPL31, RPLP1, RPS12, RPLP2, RPL24, RPL37, TNIP1	100	253	16792	5.30972	0.413868	0.0851865	1.11954
UP_KEYWORDS	Ribonucleoprotein	8	7.33945	0.00095876	RPS18, RPL31, RPLP1, RPS12, RPLP2, RPL24, RPL37, FBL	109	296	20581	5.10315	0.180874	0.0949443	1.20271
GOTERM_MF_DIRECT	GO:0003735~structural constituent of ribosome	7	6.42202	0.00186193	RPS18, RPL31, RPLP1, RPS12, RPLP2, RPL24, RPL37	99	222	16881	5.3766	0.321346	0.176195	2.32349
GOTERM_CC_DIRECT	GO:0005840~ribosome	6	5.50459	0.00241568	RPS18, RPL31, RPLP1, RPLP2, RPL24, RPL37	103	166	18224	6.39513	0.276817	0.1024	2.79206
GOTERM_BP_DIRECT	GO:0002181~cytoplasmic translation	3	2.75229	0.00945029	RPL31, RPLP1, RPLP2	100	25	16792	20.1504	0.998906	0.461937	13.3836
GOTERM_CC_DIRECT	GO:0005925~focal adhesion	5	4.58716	0.176176	RPS18, RPL31, RPLP1, RPLP2, SPRY4	103	391	18224	2.26256	1	0.885144	89.6589
Annotation Cluster 2	Enrichment Score: 1.4029462431293094
Category	Term	Count	%	PValue	Genes	List Total	Pop Hits	Pop Total	Fold Enrichment	Bonferroni	Benjamini	FDR
GOTERM_BP_DIRECT	GO:0006814~sodium ion transport	4	3.66972	0.0121692	SLC5A3, SLC38A4, SLC9B2, SLC5A7	100	81	16792	8.29235	0.999848	0.519338	16.9122
UP_KEYWORDS	Symport	4	3.66972	0.0216942	SLC5A3, SLC38A4, SLC12A8, SLC5A7	109	113	20581	6.68377	0.989559	0.532494	24.1697
UP_KEYWORDS	Sodium transport	4	3.66972	0.0237453	SLC5A3, SLC38A4, SLC9B2, SLC5A7	109	117	20581	6.45527	0.993253	0.510361	26.151
UP_KEYWORDS	Sodium	4	3.66972	0.0275794	SLC5A3, SLC38A4, SLC9B2, SLC5A7	109	124	20581	6.09086	0.997024	0.51671	29.7272
UP_KEYWORDS	Ion transport	8	7.33945	0.0522746	SLC5A3, FXYD1, SLC38A4, SLC12A8, SLC9B2, SLC5A7, HVCN1, CRACR2A	109	642	20581	2.35285	0.999986	0.549631	49.2001
GOTERM_BP_DIRECT	GO:0055085~transmembrane transport	3	2.75229	0.422925	SLC5A3, SLC12A8, SLC5A7	100	244	16792	2.06459	1	0.999845	99.9756
Annotation Cluster 3	Enrichment Score: 0.9546048437972913
Category	Term	Count	%	PValue	Genes	List Total	Pop Hits	Pop Total	Fold Enrichment	Bonferroni	Benjamini	FDR
GOTERM_BP_DIRECT	GO:0000165~MAPK cascade	6	5.50459	0.0194307	DUSP5, HRAS, PSMB7, IL1B, PSME4, SCG2	100	262	16792	3.8455	0.999999	0.609074	25.6894
GOTERM_BP_DIRECT	GO:0002223~stimulatory C-type lectin receptor signaling pathway	3	2.75229	0.127427	HRAS, PSMB7, PSME4	100	105	16792	4.79771	1	0.973346	87.2878
GOTERM_BP_DIRECT	GO:0050852~T cell receptor signaling pathway	3	2.75229	0.217136	HRAS, PSMB7, PSME4	100	148	16792	3.40378	1	0.992421	97.538
GOTERM_BP_DIRECT	GO:0038095~Fc-epsilon receptor signaling pathway	3	2.75229	0.282553	HRAS, PSMB7, PSME4	100	178	16792	2.83011	1	0.996575	99.3426
Annotation Cluster 4	Enrichment Score: 0.9131915256344699
Category	Term	Count	%	PValue	Genes	List Total	Pop Hits	Pop Total	Fold Enrichment	Bonferroni	Benjamini	FDR
GOTERM_BP_DIRECT	GO:0001934~positive regulation of protein phosphorylation	5	4.58716	0.00675743	HRAS, CCND1, MMP9, IL1B, CYR61	100	127	16792	6.61102	0.992314	0.417789	9.75117
KEGG_PATHWAY	hsa05219:Bladder cancer	3	2.75229	0.0367693	HRAS, CCND1, MMP9	52	41	6879	9.67964	0.995285	0.931338	35.8317
KEGG_PATHWAY	hsa05200:Pathways in cancer	6	5.50459	0.164415	HRAS, CCND1, BCR, GNG10, MMP9, F2R	52	393	6879	2.01967	1	0.97451	88.0837
KEGG_PATHWAY	hsa05161:Hepatitis B	3	2.75229	0.292166	HRAS, CCND1, MMP9	52	145	6879	2.737	1	0.977652	98.3298
KEGG_PATHWAY	hsa05205:Proteoglycans in cancer	3	2.75229	0.439364	HRAS, CCND1, MMP9	52	200	6879	1.98433	1	0.994327	99.8944
KEGG_PATHWAY	hsa05206:MicroRNAs in cancer	3	2.75229	0.632685	HRAS, CCND1, MMP9	52	286	6879	1.38764	1	0.998908	99.9993
Annotation Cluster 5	Enrichment Score: 0.893865339529376
Category	Term	Count	%	PValue	Genes	List Total	Pop Hits	Pop Total	Fold Enrichment	Bonferroni	Benjamini	FDR
KEGG_PATHWAY	hsa05220:Chronic myeloid leukemia	3	2.75229	0.0992887	HRAS, CCND1, BCR	52	72	6879	5.51202	1	0.993157	71.0157
UP_KEYWORDS	Proto-oncogene	4	3.66972	0.127515	HRAS, CCND1, BCR, EWSR1	109	236	20581	3.20028	1	0.693403	82.1065
KEGG_PATHWAY	hsa05200:Pathways in cancer	6	5.50459	0.164415	HRAS, CCND1, BCR, GNG10, MMP9, F2R	52	393	6879	2.01967	1	0.97451	88.0837
Annotation Cluster 6	Enrichment Score: 0.8778256020343651
Category	Term	Count	%	PValue	Genes	List Total	Pop Hits	Pop Total	Fold Enrichment	Bonferroni	Benjamini	FDR
UP_KEYWORDS	Antibiotic	3	2.75229	0.0889977	BPI, CCL20, HAMP	109	95	20581	5.96263	1	0.620683	69.1425
UP_KEYWORDS	Antimicrobial	3	2.75229	0.110333	BPI, CCL20, HAMP	109	108	20581	5.2449	1	0.652594	77.1161
GOTERM_BP_DIRECT	GO:0006955~immune response	5	4.58716	0.23683	BPI, CCL20, HAMP, IL1B, IL24	100	421	16792	1.9943	1	0.994725	98.3257
Annotation Cluster 7	Enrichment Score: 0.8550418910064372
Category	Term	Count	%	PValue	Genes	List Total	Pop Hits	Pop Total	Fold Enrichment	Bonferroni	Benjamini	FDR
UP_KEYWORDS	Cell membrane	25	22.9358	0.0384914	GPR84, CCKAR, SLC38A4, HRAS, GDF5, ASTN1, FPR1, CXCR1, GPR143, HVCN1, MMP25, SPRY4, CANT1, HCAR2, EWSR1, MRC1, TMEFF1, BCR, NTNG2, GPRC6A, RGS2, GNG10, DGKZ, RAB15, F2R	109	3175	20581	1.48674	0.999715	0.493568	39.0514
GOTERM_CC_DIRECT	GO:0005886~plasma membrane	29	26.6055	0.146578	FXYD1, SLC5A3, GPR84, CCKAR, SLC38A4, HRAS, GDF5, FPR1, CXCR1, CCT3, HVCN1, GPR143, MMP25, CANT1, KLRD1, HCAR2, EWSR1, MRC1, TMEFF1, TC2N, GPRC6A, PENK, RGS2, GNG10, DGKZ, RAB15, C2CD4A, SLC5A7, F2R	103	4121	18224	1.24509	1	0.854972	84.3668
UP_KEYWORDS	Membrane	41	37.6147	0.482439	FXYD1, SLC5A3, GPR84, CCKAR, SLC38A4, HRAS, GDF5, FPR1, ASTN1, CXCR1, RNF186, CERS3, VPS37D, HVCN1, GPR143, SPRY4, MMP25, CANT1, SLC9B2, KLRD1, HCAR2, EWSR1, RAB27A, MRC1, SLC12A8, TMEFF1, BCR, NTNG2, GPRC6A, TMEM39A, BPI, CCND1, SEC61B, RGS2, GNG10, FER1L6, RAB15, DGKZ, SLC5A7, F2R, FABP6	109	7494	20581	1.03302	1	0.955556	99.9754
Annotation Cluster 8	Enrichment Score: 0.83062715028141
Category	Term	Count	%	PValue	Genes	List Total	Pop Hits	Pop Total	Fold Enrichment	Bonferroni	Benjamini	FDR
UP_KEYWORDS	Cytokine	4	3.66972	0.0784138	CCL20, GDF5, IL1B, IL24	109	190	20581	3.97508	1	0.631797	64.3022
GOTERM_MF_DIRECT	GO:0005125~cytokine activity	4	3.66972	0.0828364	GDF5, IL1B, IL24, SCG2	99	176	16881	3.87534	1	0.972598	66.404
KEGG_PATHWAY	hsa04060:Cytokine-cytokine receptor interaction	5	4.58716	0.10472	CCL20, GDF5, CXCR1, IL1B, IL24	52	243	6879	2.72198	1	0.980834	73.0191
GOTERM_BP_DIRECT	GO:0007267~cell-cell signaling	4	3.66972	0.189168	CCL20, GDF5, IL1B, CYR61	100	254	16792	2.64441	1	0.986455	95.8125
GOTERM_BP_DIRECT	GO:0006955~immune response	5	4.58716	0.23683	BPI, CCL20, HAMP, IL1B, IL24	100	421	16792	1.9943	1	0.994725	98.3257
GOTERM_CC_DIRECT	GO:0005615~extracellular space	10	9.17431	0.340651	BPI, CCL20, HAMP, MMP9, GDF5, NPPC, IL1B, IGFBP1, IL24, SCG2	103	1347	18224	1.31353	1	0.969444	99.2377
Annotation Cluster 9	Enrichment Score: 0.7714879161356496
Category	Term	Count	%	PValue	Genes	List Total	Pop Hits	Pop Total	Fold Enrichment	Bonferroni	Benjamini	FDR
UP_KEYWORDS	Prenylation	4	3.66972	0.0586457	HRAS, GNG10, RAB15, RAB27A	109	168	20581	4.49563	0.999997	0.567443	53.3437
UP_KEYWORDS	GTP-binding	5	4.58716	0.106552	HRAS, RASEF, SPAG1, RAB15, RAB27A	109	343	20581	2.75243	1	0.655347	75.8584
GOTERM_BP_DIRECT	GO:0007264~small GTPase mediated signal transduction	4	3.66972	0.177369	HRAS, RASEF, RAB15, RAB27A	100	246	16792	2.73041	1	0.987485	94.7893
GOTERM_MF_DIRECT	GO:0005525~GTP binding	5	4.58716	0.184185	HRAS, RASEF, SPAG1, RAB15, RAB27A	99	384	16881	2.22025	1	0.990947	92.3303
GOTERM_CC_DIRECT	GO:0048471~perinuclear region of cytoplasm	4	3.66972	0.68019	HRAS, KRT18, RASEF, RAB15	103	621	18224	1.13966	1	0.99828	99.9998
Annotation Cluster 10	Enrichment Score: 0.7634330430843146
Category	Term	Count	%	PValue	Genes	List Total	Pop Hits	Pop Total	Fold Enrichment	Bonferroni	Benjamini	FDR
GOTERM_BP_DIRECT	GO:0007200~phospholipase C-activating G-protein coupled receptor signaling pathway	4	3.66972	0.00695346	GPR84, CCKAR, FPR1, F2R	100	66	16792	10.177	0.993329	0.394077	10.0203
UP_KEYWORDS	Transducer	9	8.25688	0.100299	GPR84, CCKAR, GNG10, FPR1, CXCR1, GPRC6A, GPR143, HCAR2, F2R	109	899	20581	1.89027	1	0.648964	73.6384
UP_KEYWORDS	G-protein coupled receptor	8	7.33945	0.153949	GPR84, CCKAR, FPR1, CXCR1, GPRC6A, GPR143, HCAR2, F2R	109	842	20581	1.79398	1	0.737474	87.862
GOTERM_BP_DIRECT	GO:0007186~G-protein coupled receptor signaling pathway	9	8.25688	0.16042	NPB, CCL20, GNG10, FPR1, CXCR1, GPRC6A, GPR143, HCAR2, F2R	100	899	16792	1.68107	1	0.984775	92.9056
GOTERM_BP_DIRECT	GO:0007204~positive regulation of cytosolic calcium ion concentration	3	2.75229	0.187087	CCKAR, FPR1, F2R	100	134	16792	3.7594	1	0.987401	95.6469
UP_KEYWORDS	Receptor	10	9.17431	0.50104	MRC1, GPR84, CCKAR, FPR1, CXCR1, GPRC6A, GPR143, HCAR2, KLRD1, F2R	109	1648	20581	1.14573	1	0.959784	99.9845
KEGG_PATHWAY	hsa04080:Neuroactive ligand-receptor interaction	3	2.75229	0.615034	CCKAR, FPR1, F2R	52	277	6879	1.43273	1	0.998914	99.9988
GOTERM_MF_DIRECT	GO:0004930~G-protein coupled receptor activity	4	3.66972	0.786296	CXCR1, GPRC6A, GPR143, F2R	99	710	16881	0.960649	1	1	100
Annotation Cluster 11	Enrichment Score: 0.5369783543917526
Category	Term	Count	%	PValue	Genes	List Total	Pop Hits	Pop Total	Fold Enrichment	Bonferroni	Benjamini	FDR
UP_KEYWORDS	Nucleotide-binding	15	13.7615	0.0845366	HRAS, SGK2, BCR, RASEF, DDX39B, SPAG1, CCT3, CCT5, NLRC3, DGKZ, RAB15, DDX54, TARSL2, CYR61, RAB27A	109	1788	20581	1.58403	1	0.61975	67.1812
UP_KEYWORDS	ATP-binding	9	8.25688	0.447411	CCT5, BCR, NLRC3, SGK2, DDX39B, DGKZ, CCT3, DDX54, TARSL2	109	1391	20581	1.22167	1	0.947	99.9437
GOTERM_MF_DIRECT	GO:0005524~ATP binding	9	8.25688	0.64761	CCT5, BCR, NLRC3, SGK2, DDX39B, DGKZ, CCT3, DDX54, TARSL2	99	1495	16881	1.02651	1	0.999999	99.9998
Annotation Cluster 12	Enrichment Score: 0.496896471653993
Category	Term	Count	%	PValue	Genes	List Total	Pop Hits	Pop Total	Fold Enrichment	Bonferroni	Benjamini	FDR
UP_KEYWORDS	Secreted	15	13.7615	0.147792	MUC2, NPB, MMP9, GDF5, IL24, MMP25, BPI, CCL20, PENK, HAMP, NPPC, IL1B, IGFBP1, CYR61, SCG2	109	1965	20581	1.44135	1	0.735675	86.6995
GOTERM_CC_DIRECT	GO:0005576~extracellular region	12	11.0092	0.289326	NPB, PENK, CCL20, HAMP, MMP9, GDF5, NPPC, IL1B, IGFBP1, IL24, F2R, CYR61	103	1610	18224	1.31875	1	0.952693	98.1664
GOTERM_CC_DIRECT	GO:0005615~extracellular space	10	9.17431	0.340651	BPI, CCL20, HAMP, MMP9, GDF5, NPPC, IL1B, IGFBP1, IL24, SCG2	103	1347	18224	1.31353	1	0.969444	99.2377
UP_KEYWORDS	Signal	21	19.2661	0.706423	MRC1, FXYD1, MUC2, TMEFF1, NPB, MMP9, GDF5, ASTN1, NTNG2, IL24, GPRC6A, MMP25, BPI, CCL20, PENK, HAMP, NPPC, IGFBP1, CYR61, SCG2, F2R	109	4160	20581	0.95316	1	0.992572	100
Annotation Cluster 13	Enrichment Score: 0.22112908096071845
Category	Term	Count	%	PValue	Genes	List Total	Pop Hits	Pop Total	Fold Enrichment	Bonferroni	Benjamini	FDR
GOTERM_CC_DIRECT	GO:0005887~integral component of plasma membrane	11	10.0917	0.267528	MRC1, SLC5A3, FXYD1, GPR84, CCKAR, SLC38A4, BPI, FPR1, SLC5A7, HVCN1, F2R	103	1415	18224	1.37544	1	0.959607	97.3882
UP_KEYWORDS	Membrane	41	37.6147	0.482439	FXYD1, SLC5A3, GPR84, CCKAR, SLC38A4, HRAS, GDF5, FPR1, ASTN1, CXCR1, RNF186, CERS3, VPS37D, HVCN1, GPR143, SPRY4, MMP25, CANT1, SLC9B2, KLRD1, HCAR2, EWSR1, RAB27A, MRC1, SLC12A8, TMEFF1, BCR, NTNG2, GPRC6A, TMEM39A, BPI, CCND1, SEC61B, RGS2, GNG10, FER1L6, RAB15, DGKZ, SLC5A7, F2R, FABP6	109	7494	20581	1.03302	1	0.955556	99.9754
UP_KEYWORDS	Glycoprotein	25	22.9358	0.526814	SLC5A3, GPR84, CCKAR, SLC38A4, MMP9, GDF5, ASTN1, FPR1, CXCR1, GPR143, MMP25, CANT1, KLRD1, SCG2, MRC1, MUC2, SLC12A8, NTNG2, IL24, GPRC6A, TMEM39A, BPI, KRT18, SLC5A7, F2R	109	4551	20581	1.03723	1	0.963538	99.992
UP_KEYWORDS	Transmembrane helix	26	23.8532	0.864308	SLC5A3, FXYD1, GPR84, CCKAR, SLC38A4, ASTN1, FPR1, CXCR1, RNF186, CERS3, GPR143, HVCN1, CANT1, SLC9B2, KLRD1, HCAR2, MRC1, TMEFF1, SLC12A8, GPRC6A, TMEM39A, BPI, SEC61B, FER1L6, SLC5A7, F2R	109	5634	20581	0.871358	1	0.998632	100
UP_KEYWORDS	Transmembrane	26	23.8532	0.868398	SLC5A3, FXYD1, GPR84, CCKAR, SLC38A4, ASTN1, FPR1, CXCR1, RNF186, CERS3, GPR143, HVCN1, CANT1, SLC9B2, KLRD1, HCAR2, MRC1, TMEFF1, SLC12A8, GPRC6A, TMEM39A, BPI, SEC61B, FER1L6, SLC5A7, F2R	109	5651	20581	0.868736	1	0.998627	100
GOTERM_CC_DIRECT	GO:0016021~integral component of membrane	24	22.0183	0.923357	SLC5A3, FXYD1, SLC38A4, TMEFF1, SLC12A8, FPR1, ASTN1, CXCR1, RNF186, CERS3, GPRC6A, HVCN1, GPR143, MMP25, CANT1, TMEM39A, BPI, SEC61B, FER1L6, SLC9B2, SLC5A7, KLRD1, HCAR2, F2R	103	5163	18224	0.822462	1	0.999997	100
Annotation Cluster 14	Enrichment Score: 0.0820197115122101
Category	Term	Count	%	PValue	Genes	List Total	Pop Hits	Pop Total	Fold Enrichment	Bonferroni	Benjamini	FDR
UP_KEYWORDS	Metal-binding	18	16.5138	0.739542	GTF3A, IMPA1, ALOXE3, RASEF, MMP9, FBP1, RNF186, RPL37, KLF15, POLR1B, MMP25, CANT1, DOHH, DGKZ, EWSR1, CBS, ZNHIT3, CRACR2A	109	3640	20581	0.933708	1	0.994906	100
UP_KEYWORDS	Zinc-finger	8	7.33945	0.835742	GTF3A, DGKZ, RNF186, RPL37, KLF15, POLR1B, EWSR1, ZNHIT3	109	1781	20581	0.848137	1	0.997886	100
GOTERM_MF_DIRECT	GO:0046872~metal ion binding	10	9.17431	0.863227	GTF3A, ALOXE3, DOHH, FBP1, DGKZ, RPL37, KLF15, POLR1B, CBS, ZNHIT3	99	2069	16881	0.824143	1	1	100
UP_KEYWORDS	Zinc	10	9.17431	0.880564	GTF3A, MMP9, DGKZ, RNF186, RPL37, KLF15, POLR1B, EWSR1, MMP25, ZNHIT3	109	2348	20581	0.804159	1	0.998886	100
Annotation Cluster 15	Enrichment Score: 0.022801746793087493
Category	Term	Count	%	PValue	Genes	List Total	Pop Hits	Pop Total	Fold Enrichment	Bonferroni	Benjamini	FDR
UP_KEYWORDS	Repressor	3	2.75229	0.821224	CNOT9, CCND1, EWSR1	109	592	20581	0.95684	1	0.997688	100
UP_KEYWORDS	Transcription	8	7.33945	0.974415	GTF3A, CNOT9, CCND1, FOXA3, KLF15, POLR1B, DDX54, EWSR1	109	2398	20581	0.629913	1	0.999989	100
GOTERM_BP_DIRECT	GO:0006355~regulation of transcription, DNA-templated	5	4.58716	0.981125	GTF3A, CNOT9, DDX54, EWSR1, ZNHIT3	100	1504	16792	0.558245	1	1	100
UP_KEYWORDS	Transcription regulation	7	6.42202	0.98699	GTF3A, CNOT9, CCND1, FOXA3, KLF15, DDX54, EWSR1	109	2332	20581	0.566773	1	0.999998	100
GOTERM_BP_DIRECT	GO:0006351~transcription, DNA-templated	6	5.50459	0.992542	CNOT9, CCND1, FOXA3, POLR1B, DDX54, EWSR1	100	1955	16792	0.515355	1	1	100

## Sheet: Lipid vs Cellulose down
Annotation Cluster 1	Enrichment Score: 1.4118854729763146
Category	Term	Count	%	PValue	Genes	List Total	Pop Hits	Pop Total	Fold Enrichment	Bonferroni	Benjamini	FDR
GOTERM_CC_DIRECT	GO:0005777~peroxisome	4	4.12371	0.0152619	TMEM135, BAAT, PIPOX, ACOX3	92	104	18224	7.61873	0.846846	0.608651	16.2284
GOTERM_CC_DIRECT	GO:0005782~peroxisomal matrix	3	3.09278	0.0221379	BAAT, PIPOX, ACOX3	92	46	18224	12.9187	0.934857	0.494796	22.7214
KEGG_PATHWAY	hsa04146:Peroxisome	3	3.09278	0.0629283	BAAT, PIPOX, ACOX3	35	83	6879	7.10396	0.996013	0.936854	50.3052
GOTERM_MF_DIRECT	GO:0005102~receptor binding	5	5.15464	0.105892	BAAT, CADM4, CD200, PIPOX, ACOX3	87	353	16881	2.74836	1	0.911534	75.2687
Annotation Cluster 2	Enrichment Score: 1.1408253829831374
Category	Term	Count	%	PValue	Genes	List Total	Pop Hits	Pop Total	Fold Enrichment	Bonferroni	Benjamini	FDR
UP_KEYWORDS	Membrane	48	49.4845	0.00778876	PHLPP1, OCLN, CADM4, SLC15A1, SNX16, PDE3B, MME, ABHD1, SLC47A1, TMCC1, ACVR1C, SLC35A4, SLC29A1, POMGNT1, ACE, AQP11, VMP1, SV2A, MR1, NT5E, BDH1, RECK, GJD3, PLA2G15, KLB, MPP1, CCPG1, STK24, ABCB11, LRRC1, CDHR5, LPIN2, GUCY2C, TMEM189, UBL3, ADI1, FMN1, CD38, TMEM135, SLC41A2, CD274, CA4, AKAP7, SMURF2, ARL8A, TMEM184C, CD200, ARL4A	97	7494	20581	1.35901	0.722617	0.226223	9.04585
UP_KEYWORDS	Cell membrane	24	24.7423	0.0186759	RECK, PHLPP1, OCLN, GJD3, KLB, MME, CDHR5, GUCY2C, SLC47A1, UBL3, SLC29A1, FMN1, ADI1, ACE, SLC41A2, CD274, CA4, AKAP7, SMURF2, VMP1, MR1, NT5E, CD200, ARL4A	97	3175	20581	1.60384	0.95458	0.357049	20.4354
GOTERM_CC_DIRECT	GO:0005886~plasma membrane	30	30.9278	0.0264924	PHLPP1, OCLN, SLC15A1, MME, SLC47A1, ACVR1C, SLC29A1, ACE, AQP11, SV2A, MR1, VMP1, NT5E, RECK, KLB, ABCB11, SAMHD1, CDHR5, GUCY2C, UBL3, ADI1, FMN1, CD38, SLC41A2, CD274, CA4, AKAP7, SMURF2, CD200, ARL4A	92	4121	18224	1.44203	0.962208	0.480626	26.5921
UP_KEYWORDS	Transmembrane helix	33	34.0206	0.116724	OCLN, CADM4, SLC15A1, PDE3B, MME, ABHD1, SLC47A1, TMCC1, ACVR1C, SLC35A4, SLC29A1, ACE, POMGNT1, AQP11, SV2A, MR1, VMP1, NT5E, GJD3, KLB, CCPG1, ABCB11, CDHR5, TMEM189, GUCY2C, CD38, TMEM135, SLC41A2, CD274, CA4, SMURF2, TMEM184C, CD200	97	5634	20581	1.24277	1	0.620652	77.7989
UP_KEYWORDS	Transmembrane	33	34.0206	0.12041	OCLN, CADM4, SLC15A1, PDE3B, MME, ABHD1, SLC47A1, TMCC1, ACVR1C, SLC35A4, SLC29A1, ACE, POMGNT1, AQP11, SV2A, MR1, VMP1, NT5E, GJD3, KLB, CCPG1, ABCB11, CDHR5, TMEM189, GUCY2C, CD38, TMEM135, SLC41A2, CD274, CA4, SMURF2, TMEM184C, CD200	97	5651	20581	1.23903	1	0.615732	78.8966
GOTERM_CC_DIRECT	GO:0016021~integral component of membrane	29	29.8969	0.339207	OCLN, SLC15A1, PDE3B, MME, ABHD1, SLC47A1, TMCC1, SLC35A4, ACE, POMGNT1, AQP11, SV2A, MR1, VMP1, NT5E, KLB, CCPG1, ABCB11, CDHR5, TMEM189, GUCY2C, CD38, TMEM135, SLC41A2, CD274, CA4, SMURF2, TMEM184C, CD200	92	5163	18224	1.11263	1	0.948866	99.1522
UP_KEYWORDS	Glycoprotein	22	22.6804	0.562422	RECK, CADM4, PLA2G15, KLB, SLC15A1, ABCB11, MME, CDHR5, ABHD1, GUCY2C, SLC29A1, CD38, ACE, REG1A, AQP11, CD274, CA4, MR1, SV2A, NT5E, BDH1, CD200	97	4551	20581	1.02568	1	0.944087	99.9956
Annotation Cluster 3	Enrichment Score: 1.0094358047250305
Category	Term	Count	%	PValue	Genes	List Total	Pop Hits	Pop Total	Fold Enrichment	Bonferroni	Benjamini	FDR
GOTERM_MF_DIRECT	GO:0004702~receptor signaling protein serine/threonine kinase activity	4	4.12371	0.00248852	TNIK, SLK, STK24, ACVR1C	87	53	16881	14.6441	0.384836	0.384836	3.06218
GOTERM_BP_DIRECT	GO:0023014~signal transduction by protein phosphorylation	3	3.09278	0.0218047	SLK, STK24, ACVR1C	88	44	16792	13.0103	0.999981	0.995587	27.1487
UP_KEYWORDS	Kinase	8	8.24742	0.0560646	GCKR, TNIK, SLK, CSNK1G2, STK24, AKAP7, PCK2, ACVR1C	97	735	20581	2.30939	0.999922	0.545489	50.3231
GOTERM_BP_DIRECT	GO:0046777~protein autophosphorylation	4	4.12371	0.0600026	TNIK, SLK, CSNK1G2, STK24	88	172	16792	4.43763	1	0.999961	58.8954
UP_KEYWORDS	Serine/threonine-protein kinase	5	5.15464	0.111779	TNIK, SLK, CSNK1G2, STK24, ACVR1C	97	393	20581	2.69943	1	0.621669	76.2439
GOTERM_MF_DIRECT	GO:0004674~protein serine/threonine kinase activity	5	5.15464	0.125352	TNIK, SLK, CSNK1G2, STK24, ACVR1C	87	376	16881	2.58025	1	0.926591	81.2083
UP_KEYWORDS	Nucleotide-binding	13	13.4021	0.127567	TNIK, TTLL10, SLK, CSNK1G2, ABCB11, STK24, AKAP7, ARL8A, PCK2, GUCY2C, NT5E, ARL4A, ACVR1C	97	1788	20581	1.54266	1	0.622085	80.8869
GOTERM_BP_DIRECT	GO:0006468~protein phosphorylation	5	5.15464	0.211282	TNIK, CSNK1G2, STK24, GUCY2C, ACVR1C	88	456	16792	2.0923	1	0.999998	96.6963
GOTERM_MF_DIRECT	GO:0004672~protein kinase activity	4	4.12371	0.276493	TNIK, CSNK1G2, STK24, GUCY2C	87	359	16881	2.16194	1	0.992208	98.2398
UP_KEYWORDS	ATP-binding	7	7.21649	0.63738	TTLL10, TNIK, SLK, CSNK1G2, ABCB11, STK24, ACVR1C	97	1391	20581	1.06774	1	0.964108	99.9995
GOTERM_MF_DIRECT	GO:0005524~ATP binding	8	8.24742	0.648158	TTLL10, TNIK, SLK, CSNK1G2, ABCB11, STK24, GUCY2C, ACVR1C	87	1495	16881	1.03831	1	0.999962	99.9998
Annotation Cluster 4	Enrichment Score: 0.8414398957914613
Category	Term	Count	%	PValue	Genes	List Total	Pop Hits	Pop Total	Fold Enrichment	Bonferroni	Benjamini	FDR
UP_KEYWORDS	FAD	3	3.09278	0.0934437	SMOX, PIPOX, ACOX3	97	110	20581	5.7866	1	0.611863	69.5647
UP_KEYWORDS	Flavoprotein	3	3.09278	0.11108	SMOX, PIPOX, ACOX3	97	122	20581	5.21742	1	0.638086	76.0161
UP_KEYWORDS	Oxidoreductase	5	5.15464	0.288068	ADI1, SMOX, BDH1, PIPOX, ACOX3	97	582	20581	1.82281	1	0.805808	98.3756
Annotation Cluster 5	Enrichment Score: 0.6166155695297678
Category	Term	Count	%	PValue	Genes	List Total	Pop Hits	Pop Total	Fold Enrichment	Bonferroni	Benjamini	FDR
GOTERM_MF_DIRECT	GO:0016491~oxidoreductase activity	4	4.12371	0.0822353	ADI1, SMOX, BDH1, PIPOX	87	200	16881	3.88069	1	0.90842	65.738
UP_KEYWORDS	Oxidoreductase	5	5.15464	0.288068	ADI1, SMOX, BDH1, PIPOX, ACOX3	97	582	20581	1.82281	1	0.805808	98.3756
GOTERM_BP_DIRECT	GO:0055114~oxidation-reduction process	4	4.12371	0.596485	ADI1, SMOX, BDH1, PIPOX	88	592	16792	1.28931	1	1	99.9998
Annotation Cluster 6	Enrichment Score: 0.5037593272459746
Category	Term	Count	%	PValue	Genes	List Total	Pop Hits	Pop Total	Fold Enrichment	Bonferroni	Benjamini	FDR
UP_KEYWORDS	Repressor	7	7.21649	0.0585942	TSC22D1, LSM14A, HDAC10, CBX4, ZHX3, WTIP, MXI1	97	592	20581	2.50883	0.99995	0.533141	51.9134
GOTERM_MF_DIRECT	GO:0003714~transcription corepressor activity	4	4.12371	0.0851049	CBX4, ZHX3, WTIP, MXI1	87	203	16881	3.82334	1	0.8856	67.0514
UP_KEYWORDS	Transcription regulation	12	12.3711	0.532059	TSC22D1, ELF2, CDCA7, TAF3, HDAC10, CBX4, ZHX3, MTERF2, TBX1, WTIP, LPIN2, MXI1	97	2332	20581	1.09181	1	0.944777	99.99
UP_KEYWORDS	Transcription	12	12.3711	0.571067	TSC22D1, ELF2, CDCA7, TAF3, HDAC10, CBX4, ZHX3, MTERF2, TBX1, WTIP, LPIN2, MXI1	97	2398	20581	1.06176	1	0.944538	99.9965
GOTERM_BP_DIRECT	GO:0006351~transcription, DNA-templated	10	10.3093	0.69666	ELF2, CDCA7, HDAC10, CBX4, ZHX3, MTERF2, TBX1, WTIP, LPIN2, MXI1	88	1955	16792	0.976052	1	1	100
GOTERM_BP_DIRECT	GO:0006355~regulation of transcription, DNA-templated	6	6.18557	0.899429	TSC22D1, CDCA7, HDAC10, MTERF2, WTIP, MXI1	88	1504	16792	0.761243	1	1	100
Annotation Cluster 7	Enrichment Score: 0.4512993076715952
Category	Term	Count	%	PValue	Genes	List Total	Pop Hits	Pop Total	Fold Enrichment	Bonferroni	Benjamini	FDR
GOTERM_MF_DIRECT	GO:0061630~ubiquitin protein ligase activity	4	4.12371	0.0703085	XIAP, RABGEF1, SMURF2, TMEM189	87	187	16881	4.15047	0.999999	0.941761	59.7463
UP_KEYWORDS	Ubl conjugation pathway	5	5.15464	0.391913	XIAP, CBX4, RABGEF1, USP46, SMURF2	97	680	20581	1.56011	1	0.883146	99.7599
GOTERM_MF_DIRECT	GO:0016874~ligase activity	3	3.09278	0.401056	XIAP, CBX4, SMURF2	87	270	16881	2.15594	1	0.996124	99.8335
UP_KEYWORDS	Isopeptide bond	6	6.18557	0.613701	POMGNT1, ELF2, TAF3, XIAP, CBX4, SMURF2	97	1132	20581	1.1246	1	0.958556	99.999
UP_KEYWORDS	Ubl conjugation	7	7.21649	0.816854	ELF2, TAF3, XIAP, CBX4, RABGEF1, SAMHD1, SMURF2	97	1705	20581	0.871101	1	0.992433	100
Annotation Cluster 8	Enrichment Score: 0.3668088770334575
Category	Term	Count	%	PValue	Genes	List Total	Pop Hits	Pop Total	Fold Enrichment	Bonferroni	Benjamini	FDR
GOTERM_CC_DIRECT	GO:0005759~mitochondrial matrix	4	4.12371	0.224032	ABAT, MTERF2, PCK2, BDH1	92	327	18224	2.42308	1	0.890335	94.6086
UP_KEYWORDS	Transit peptide	4	4.12371	0.458209	ABAT, MTERF2, PCK2, BDH1	97	536	20581	1.5834	1	0.913836	99.9408
UP_KEYWORDS	Mitochondrion	5	5.15464	0.773036	ACOT7, ABAT, MTERF2, PCK2, BDH1	97	1119	20581	0.948057	1	0.987989	100
Annotation Cluster 9	Enrichment Score: 0.31941378384585245
Category	Term	Count	%	PValue	Genes	List Total	Pop Hits	Pop Total	Fold Enrichment	Bonferroni	Benjamini	FDR
GOTERM_MF_DIRECT	GO:0008270~zinc ion binding	9	9.27835	0.244241	ACE, TRIM35, TAF3, XIAP, RABGEF1, SAMHD1, MME, CA4, WTIP	87	1169	16881	1.49385	1	0.993017	96.9662
UP_KEYWORDS	Metal-binding	20	20.6186	0.333071	PHLPP1, TAF3, XIAP, STK24, PDE3B, ZHX3, MME, SAMHD1, WTIP, PCK2, ACVR1C, ADI1, TRIM35, ACE, HARBI1, RABGEF1, CA4, ABAT, CUTC, NT5E	97	3640	20581	1.1658	1	0.85014	99.2641
UP_KEYWORDS	Zinc	11	11.3402	0.667843	ACE, TRIM35, TAF3, XIAP, RABGEF1, ZHX3, SAMHD1, MME, CA4, WTIP, NT5E	97	2348	20581	0.994007	1	0.969069	99.9998
UP_KEYWORDS	Zinc-finger	5	5.15464	0.971214	TRIM35, TAF3, XIAP, RABGEF1, ZHX3	97	1781	20581	0.595663	1	0.999903	100
Annotation Cluster 10	Enrichment Score: 0.11486230226348373
Category	Term	Count	%	PValue	Genes	List Total	Pop Hits	Pop Total	Fold Enrichment	Bonferroni	Benjamini	FDR
UP_KEYWORDS	Glycoprotein	22	22.6804	0.562422	RECK, CADM4, PLA2G15, KLB, SLC15A1, ABCB11, MME, CDHR5, ABHD1, GUCY2C, SLC29A1, CD38, ACE, REG1A, AQP11, CD274, CA4, MR1, SV2A, NT5E, BDH1, CD200	97	4551	20581	1.02568	1	0.944087	99.9956
UP_KEYWORDS	Disulfide bond	13	13.4021	0.896173	RECK, CD38, ACE, CADM4, REG1A, PLA2G15, CD274, MME, ABAT, CA4, MR1, NT5E, CD200	97	3434	20581	0.803226	1	0.998156	100
UP_KEYWORDS	Signal	16	16.4948	0.897344	RECK, PLA2G15, CADM4, CDHR5, ABHD1, GUCY2C, ACVR1C, ADI1, ACE, REG1A, CD274, CA4, ABAT, MR1, NT5E, CD200	97	4160	20581	0.816059	1	0.998015	100

## Sheet: Cellulose vs Empty up
Annotation Cluster 1	Enrichment Score: 3.3353409375664507
Category	Term	Count	%	PValue	Genes	List Total	Pop Hits	Pop Total	Fold Enrichment	Bonferroni	Benjamini	FDR
UP_KEYWORDS	Calcium	13	17.1053	6.39139e-05	TRPM4, MBL2, BMP1, EGFL7, CD248, MCUB, F8, FBLN1, SNED1, PLA2G12A, AIF1L, FKBP10, EHD3	75	877	20581	4.0677	0.0102377	0.0102377	0.07723
GOTERM_MF_DIRECT	GO:0005509~calcium ion binding	12	15.7895	0.000144624	MBL2, FBLN1, BMP1, SNED1, EGFL7, PLA2G12A, CD248, SYTL4, AIF1L, FKBP10, EHD3, CRACR2B	70	717	16881	4.0361	0.0255573	0.0255573	0.177829
UP_KEYWORDS	EGF-like domain	5	6.57895	0.0106695	FBLN1, BMP1, SNED1, EGFL7, CD248	75	238	20581	5.76499	0.822185	0.250115	12.1608
Annotation Cluster 2	Enrichment Score: 1.8312053528334664
Category	Term	Count	%	PValue	Genes	List Total	Pop Hits	Pop Total	Fold Enrichment	Bonferroni	Benjamini	FDR
GOTERM_BP_DIRECT	GO:0055114~oxidation-reduction process	10	13.1579	0.000756695	TM7SF2, G6PD, NOS1, CYP27A1, UQCRH, SCD, F8, BDH1, HPGD, BCO2	71	592	16792	3.99505	0.283824	0.283824	1.06511
UP_KEYWORDS	NADP	5	6.57895	0.00454233	TM7SF2, CD38, G6PD, NOS1, CYP27A1	75	186	20581	7.3767	0.519525	0.216768	5.35447
UP_KEYWORDS	Oxidoreductase	8	10.5263	0.00488894	TM7SF2, G6PD, NOS1, CYP27A1, SCD, BDH1, HPGD, BCO2	75	582	20581	3.772	0.545723	0.179025	5.75205
GOTERM_MF_DIRECT	GO:0050661~NADP binding	3	3.94737	0.00898058	TM7SF2, G6PD, NOS1	70	35	16881	20.6706	0.801067	0.416238	10.5074
KEGG_PATHWAY	hsa01100:Metabolic pathways	10	13.1579	0.0698642	TM7SF2, MGAT4B, CD38, G6PD, NOS1, CYP27A1, UQCRH, PLA2G12A, PLPP1, BDH1	31	1219	6879	1.82037	0.992191	0.992191	52.4225
UP_KEYWORDS	Iron	4	5.26316	0.111266	NOS1, CYP27A1, SCD, BCO2	75	324	20581	3.38782	1	0.672782	75.9694
GOTERM_MF_DIRECT	GO:0005506~iron ion binding	3	3.94737	0.129487	NOS1, CYP27A1, SCD	70	153	16881	4.72857	1	0.98403	81.8501
Annotation Cluster 3	Enrichment Score: 1.468023382257551
Category	Term	Count	%	PValue	Genes	List Total	Pop Hits	Pop Total	Fold Enrichment	Bonferroni	Benjamini	FDR
UP_KEYWORDS	Signal	24	31.5789	0.0177802	TM7SF2, MGAT4B, MBL2, GPR155, BMP1, EGFL7, CD248, EFNB2, F8, ACPT, MXRA8, LMAN1, CPN1, C1QTNF5, FBLN1, SNED1, UQCRH, PLA2G12A, PCNX4, C1QTNF2, PTN, FKBP10, FIBIN, BCO2	75	4160	20581	1.58315	0.944333	0.338089	19.4954
UP_KEYWORDS	Secreted	14	18.4211	0.0220744	MBL2, BMP1, EGFL7, F8, IGHM, CPN1, C1QTNF5, FBLN1, SNED1, PLA2G12A, C1QTNF2, PTN, FIBIN, PDZD2	75	1965	20581	1.95511	0.972506	0.361877	23.6482
UP_KEYWORDS	Disulfide bond	18	23.6842	0.100485	MBL2, BMP1, EGFL7, CD248, EFNB2, F8, ACPT, MXRA8, LMAN1, IGHM, CPN1, CD38, FBLN1, SNED1, UQCRH, PTN, DPP6, FIBIN	75	3434	20581	1.43839	1	0.655485	72.1988
Annotation Cluster 4	Enrichment Score: 1.4264177183624545
Category	Term	Count	%	PValue	Genes	List Total	Pop Hits	Pop Total	Fold Enrichment	Bonferroni	Benjamini	FDR
GOTERM_MF_DIRECT	GO:0005525~GTP binding	7	9.21053	0.00478322	SEPT5, RTKN, TUBB6, AGAP3, ARL13A, EHD3, ARL4A	70	384	16881	4.39609	0.576097	0.348922	5.72967
UP_KEYWORDS	GTP-binding	6	7.89474	0.00787148	SEPT5, RTKN, TUBB6, AGAP3, ARL13A, ARL4A	75	343	20581	4.80023	0.71982	0.224668	9.11042
UP_KEYWORDS	Nucleotide-binding	10	13.1579	0.191116	SEPT5, TRPM4, NLRC3, RTKN, TUBB6, AGAP3, ARL13A, EHD3, KIFC3, ARL4A	75	1788	20581	1.53475	1	0.773429	92.2989
GOTERM_BP_DIRECT	GO:0007264~small GTPase mediated signal transduction	3	3.94737	0.273688	AGAP3, ARL13A, ARL4A	71	246	16792	2.88423	1	1	98.9149
Annotation Cluster 5	Enrichment Score: 1.0271555525027427
Category	Term	Count	%	PValue	Genes	List Total	Pop Hits	Pop Total	Fold Enrichment	Bonferroni	Benjamini	FDR
UP_KEYWORDS	Secreted	14	18.4211	0.0220744	MBL2, BMP1, EGFL7, F8, IGHM, CPN1, C1QTNF5, FBLN1, SNED1, PLA2G12A, C1QTNF2, PTN, FIBIN, PDZD2	75	1965	20581	1.95511	0.972506	0.361877	23.6482
GOTERM_CC_DIRECT	GO:0005615~extracellular space	10	13.1579	0.0826885	MBL2, FBLN1, C1QTNF5, BMP1, EGFL7, C1QTNF2, F8, PTN, IGHM, CPN1	73	1347	18224	1.85333	0.999968	0.968328	62.8705
GOTERM_CC_DIRECT	GO:0005576~extracellular region	8	10.5263	0.45415	MBL2, FBLN1, BMP1, EGFL7, PLA2G12A, F8, FIBIN, PDZD2	73	1610	18224	1.24047	1	0.986067	99.9041
Annotation Cluster 6	Enrichment Score: 0.6092194363423699
Category	Term	Count	%	PValue	Genes	List Total	Pop Hits	Pop Total	Fold Enrichment	Bonferroni	Benjamini	FDR
UP_KEYWORDS	Membrane	34	44.7368	0.090567	SLC45A3, TM7SF2, SGPP1, CD248, KCNK18, CYTH3, LMAN1, PLPP1, IGHM, SLC26A2, KIFC3, TSPAN10, STX19, PCNX4, AIF1L, DPP6, BDH1, EHD3, TRPM4, MGAT4B, GPR155, NOS1, SCD, MCUB, EFNB2, F8, ACPT, MXRA8, RHBDD2, CD38, CYP27A1, UQCRH, SYTL4, ARL4A	75	7494	20581	1.245	1	0.664368	68.2582
UP_KEYWORDS	Glycoprotein	22	28.9474	0.124266	MGAT4B, GPR155, BMP1, CD248, KCNK18, EFNB2, F8, ACPT, MXRA8, PLPP1, IGHM, SLC26A2, CPN1, CD38, FBLN1, TSPAN10, SNED1, PCNX4, DPP6, FKBP10, FIBIN, BDH1	75	4551	20581	1.32654	1	0.694822	79.8899
UP_KEYWORDS	Transmembrane helix	23	30.2632	0.366255	SLC45A3, TM7SF2, MGAT4B, TRPM4, GPR155, SGPP1, SCD, CD248, MCUB, KCNK18, EFNB2, F8, ACPT, MXRA8, LMAN1, PLPP1, IGHM, SLC26A2, RHBDD2, CD38, TSPAN10, PCNX4, DPP6	75	5634	20581	1.12025	1	0.920515	99.5967
UP_KEYWORDS	Transmembrane	23	30.2632	0.372338	SLC45A3, TM7SF2, MGAT4B, TRPM4, GPR155, SGPP1, SCD, CD248, MCUB, KCNK18, EFNB2, F8, ACPT, MXRA8, LMAN1, PLPP1, IGHM, SLC26A2, RHBDD2, CD38, TSPAN10, PCNX4, DPP6	75	5651	20581	1.11688	1	0.917877	99.6411
GOTERM_CC_DIRECT	GO:0016021~integral component of membrane	21	27.6316	0.585951	SLC45A3, MGAT4B, TRPM4, TM7SF2, GPR155, SGPP1, SCD, CD248, F8, ACPT, MXRA8, LMAN1, PLPP1, IGHM, SLC26A2, RHBDD2, CD38, TSPAN10, STX19, PCNX4, DPP6	73	5163	18224	1.0154	1	0.997201	99.996
Annotation Cluster 7	Enrichment Score: 0.39159823283868556
Category	Term	Count	%	PValue	Genes	List Total	Pop Hits	Pop Total	Fold Enrichment	Bonferroni	Benjamini	FDR
UP_KEYWORDS	Mitochondrion inner membrane	3	3.94737	0.253395	UQCRH, MCUB, BDH1	75	270	20581	3.04904	1	0.824916	97.0761
UP_KEYWORDS	Transit peptide	4	5.26316	0.303305	CYP27A1, UQCRH, MCUB, BDH1	75	536	20581	2.04786	1	0.874831	98.7331
UP_KEYWORDS	Mitochondrion	5	6.57895	0.57701	CYP27A1, UQCRH, MCUB, BDH1, BCO2	75	1119	20581	1.22615	1	0.978676	99.997
GOTERM_CC_DIRECT	GO:0005739~mitochondrion	6	7.89474	0.611994	NOS1, DACT2, UQCRH, MCUB, BDH1, BCO2	73	1331	18224	1.12537	1	0.99747	99.9981
Annotation Cluster 8	Enrichment Score: 0.2646507318484068
Category	Term	Count	%	PValue	Genes	List Total	Pop Hits	Pop Total	Fold Enrichment	Bonferroni	Benjamini	FDR
UP_KEYWORDS	Nucleotide-binding	10	13.1579	0.191116	SEPT5, TRPM4, NLRC3, RTKN, TUBB6, AGAP3, ARL13A, EHD3, KIFC3, ARL4A	75	1788	20581	1.53475	1	0.773429	92.2989
UP_KEYWORDS	ATP-binding	4	5.26316	0.884575	TRPM4, NLRC3, EHD3, KIFC3	75	1391	20581	0.789111	1	0.999284	100
GOTERM_MF_DIRECT	GO:0005524~ATP binding	4	5.26316	0.950641	TRPM4, NLRC3, EHD3, KIFC3	70	1495	16881	0.645237	1	1	100

## Sheet: Cellulose vs Empty down
Annotation Cluster 1	Enrichment Score: 1.6877656283126667
Category	Term	Count	%	PValue	Genes	List Total	Pop Hits	Pop Total	Fold Enrichment	Bonferroni	Benjamini	FDR
UP_KEYWORDS	Zinc	13	25	0.0107395	BMI1, POLR1A, NUFIP1, ANPEP, KLF15, POLR2B, MYRIP, RNF5, DNAJC24, HIVEP3, NEURL3, FYCO1, EWSR1	52	2348	20581	2.19133	0.777063	0.393645	11.9478
UP_KEYWORDS	Zinc-finger	11	21.1538	0.0109913	BMI1, MYRIP, RNF5, DNAJC24, HIVEP3, NUFIP1, KLF15, FYCO1, NEURL3, POLR2B, EWSR1	52	1781	20581	2.44451	0.784813	0.318911	12.2116
GOTERM_MF_DIRECT	GO:0008270~zinc ion binding	9	17.3077	0.0144752	BMI1, MYRIP, RNF5, DNAJC24, POLR1A, ANPEP, SEC24C, NEURL3, EWSR1	48	1169	16881	2.7076	0.900121	0.683964	16.1118
UP_KEYWORDS	Metal-binding	14	26.9231	0.103819	BMI1, POLR1A, NUFIP1, ANPEP, KLF15, POLR2B, MYRIP, RNF5, DNAJC24, HIVEP3, ITPK1, NEURL3, FYCO1, EWSR1	52	3640	20581	1.52226	1	0.719081	72.5197
Annotation Cluster 2	Enrichment Score: 1.247933700340497
Category	Term	Count	%	PValue	Genes	List Total	Pop Hits	Pop Total	Fold Enrichment	Bonferroni	Benjamini	FDR
UP_KEYWORDS	Nucleus	20	38.4615	0.0420584	BMI1, HINT3, SGK2, DDX39B, POLR1A, NUFIP1, KLF15, RNASEH2C, POLR2B, CD3EAP, CCND1, FBXW7, RRP1B, HIPK1, ACTR5, PARP14, HIVEP3, RRS1, EWSR1, CSDC2	52	5244	20581	1.50949	0.997452	0.485018	39.7307
GOTERM_CC_DIRECT	GO:0005634~nucleus	21	40.3846	0.0638549	BMI1, HINT3, SGK2, DDX39B, POLR1A, NUFIP1, KLF15, RNASEH2C, POLR2B, CD3EAP, CCND1, RRP1B, HIPK1, UBE2K, ACTR5, PARP14, HIVEP3, NLRP12, RRS1, EWSR1, CSDC2	50	5415	18224	1.4135	0.996993	0.855656	51.0671
UP_KEYWORDS	Transcription	11	21.1538	0.0671665	BMI1, CD3EAP, CCND1, HIPK1, ACTR5, PARP14, HIVEP3, POLR1A, KLF15, POLR2B, EWSR1	52	2398	20581	1.81554	0.999936	0.619567	55.9276
Annotation Cluster 3	Enrichment Score: 0.9819343225902017
Category	Term	Count	%	PValue	Genes	List Total	Pop Hits	Pop Total	Fold Enrichment	Bonferroni	Benjamini	FDR
INTERPRO	IPR013083:Zinc finger, RING/FYVE/PHD-type	5	9.61538	0.0333963	BMI1, MYRIP, RNF5, FYCO1, NEURL3	51	453	18559	4.01658	0.99483	0.99483	33.4967
UP_SEQ_FEATURE	zinc finger region:RING-type	3	5.76923	0.108474	BMI1, RNF5, NEURL3	50	230	20063	5.23383	1	0.999999	77.4569
SMART	SM00184:RING	3	5.76923	0.172847	BMI1, RNF5, NEURL3	32	244	10057	3.86411	0.999495	0.999495	82.3806
INTERPRO	IPR001841:Zinc finger, RING-type	3	5.76923	0.188616	BMI1, RNF5, NEURL3	51	295	18559	3.7007	1	1	91.8742
Annotation Cluster 4	Enrichment Score: 0.7845761235404753
Category	Term	Count	%	PValue	Genes	List Total	Pop Hits	Pop Total	Fold Enrichment	Bonferroni	Benjamini	FDR
UP_KEYWORDS	Transferase	10	19.2308	0.0231546	SGK2, HIPK1, UBE2K, PARP14, POLR1A, MINK1, MBOAT2, ITPK1, POLR2B, MRM2	52	1708	20581	2.31726	0.961471	0.418836	24.1237
UP_KEYWORDS	Nucleotide-binding	10	19.2308	0.030067	HINT3, SGK2, HIPK1, UBE2K, DDX39B, SPAG1, NLRP12, MINK1, ITPK1, SEPT11	52	1788	20581	2.21358	0.985642	0.454583	30.215
GOTERM_BP_DIRECT	GO:0006468~protein phosphorylation	5	9.61538	0.0382465	FASTKD1, CCND1, SGK2, HIPK1, MINK1	48	456	16792	3.83589	0.999998	0.999998	41.2153
UP_SEQ_FEATURE	nucleotide phosphate-binding region:ATP	6	11.5385	0.0939613	SGK2, HIPK1, DDX39B, NLRP12, MINK1, ITPK1	50	994	20063	2.42209	1	1	72.2029
UP_KEYWORDS	ATP-binding	7	13.4615	0.128047	SGK2, HIPK1, UBE2K, DDX39B, NLRP12, MINK1, ITPK1	52	1391	20581	1.99175	1	0.743444	80.1042
UP_SEQ_FEATURE	binding site:ATP	4	7.69231	0.155221	SGK2, HIPK1, MINK1, ITPK1	50	558	20063	2.87642	1	0.999999	88.7921
INTERPRO	IPR008271:Serine/threonine-protein kinase, active site	3	5.76923	0.205267	SGK2, HIPK1, MINK1	51	312	18559	3.49906	1	0.999993	93.6654
UP_SEQ_FEATURE	active site:Proton acceptor	4	7.69231	0.225583	SGK2, HIPK1, HSD17B14, MINK1	50	672	20063	2.38845	1	0.999974	96.3734
GOTERM_MF_DIRECT	GO:0005524~ATP binding	7	13.4615	0.23395	SGK2, HIPK1, UBE2K, DDX39B, NLRP12, MINK1, ITPK1	48	1495	16881	1.6467	1	0.990709	95.9689
UP_KEYWORDS	Serine/threonine-protein kinase	3	5.76923	0.2545	SGK2, HIPK1, MINK1	52	393	20581	3.02129	1	0.830511	96.8602
INTERPRO	IPR017441:Protein kinase, ATP binding site	3	5.76923	0.274064	SGK2, HIPK1, MINK1	51	381	18559	2.86537	1	0.999996	97.8646
UP_KEYWORDS	Kinase	4	7.69231	0.274115	SGK2, HIPK1, MINK1, ITPK1	52	735	20581	2.15395	1	0.843616	97.7068
GOTERM_MF_DIRECT	GO:0004674~protein serine/threonine kinase activity	3	5.76923	0.281666	SGK2, HIPK1, MINK1	48	376	16881	2.80602	1	0.99463	98.1427
SMART	SM00220:S_TKc	3	5.76923	0.304103	SGK2, HIPK1, MINK1	32	359	10057	2.62631	0.999999	0.999291	96.3739
UP_SEQ_FEATURE	domain:Protein kinase	3	5.76923	0.326355	SGK2, HIPK1, MINK1	50	478	20063	2.51837	1	0.999995	99.4057
INTERPRO	IPR000719:Protein kinase, catalytic domain	3	5.76923	0.37903	SGK2, HIPK1, MINK1	51	487	18559	2.2417	1	1	99.6727
INTERPRO	IPR011009:Protein kinase-like domain	3	5.76923	0.420998	SGK2, HIPK1, MINK1	51	531	18559	2.05594	1	0.999999	99.8588
Annotation Cluster 5	Enrichment Score: 0.5250468545726538
Category	Term	Count	%	PValue	Genes	List Total	Pop Hits	Pop Total	Fold Enrichment	Bonferroni	Benjamini	FDR
UP_KEYWORDS	Mitochondrion	6	11.5385	0.142502	FASTKD1, NUDT9, RNF5, SLC25A47, MRM2, CEBPZOS	52	1119	20581	2.12219	1	0.759401	83.6616
UP_KEYWORDS	Transit peptide	3	5.76923	0.384791	FASTKD1, NUDT9, MRM2	52	536	20581	2.21523	1	0.902554	99.6736
GOTERM_CC_DIRECT	GO:0005739~mitochondrion	5	9.61538	0.485081	CD3EAP, FASTKD1, NUDT9, SLC25A47, MRM2	50	1331	18224	1.3692	1	0.998481	99.9245
Annotation Cluster 6	Enrichment Score: 0.4948649439831782
Category	Term	Count	%	PValue	Genes	List Total	Pop Hits	Pop Total	Fold Enrichment	Bonferroni	Benjamini	FDR
UP_KEYWORDS	Proto-oncogene	3	5.76923	0.115964	BMI1, CCND1, EWSR1	52	236	20581	5.03121	1	0.732306	76.6014
GOTERM_BP_DIRECT	GO:0006351~transcription, DNA-templated	8	15.3846	0.303913	BMI1, CCND1, HIPK1, ACTR5, PARP14, POLR1A, POLR2B, EWSR1	48	1955	16792	1.43154	1	1	99.2814
UP_KEYWORDS	Transcription regulation	8	15.3846	0.35574	BMI1, CCND1, HIPK1, ACTR5, PARP14, HIVEP3, KLF15, EWSR1	52	2332	20581	1.35776	1	0.896004	99.4377
UP_KEYWORDS	Repressor	3	5.76923	0.433553	BMI1, CCND1, EWSR1	52	592	20581	2.00568	1	0.921802	99.8766
GOTERM_BP_DIRECT	GO:0006355~regulation of transcription, DNA-templated	5	9.61538	0.6172	HIPK1, ACTR5, PARP14, EWSR1, CSDC2	48	1504	16792	1.16301	1	1	99.9998
Annotation Cluster 7	Enrichment Score: 0.4806676677010012
Category	Term	Count	%	PValue	Genes	List Total	Pop Hits	Pop Total	Fold Enrichment	Bonferroni	Benjamini	FDR
UP_KEYWORDS	Ubl conjugation	7	13.4615	0.245042	BMI1, CD3EAP, FBXW7, CCND1, HIPK1, UBE2K, DDX39B	52	1705	20581	1.62494	1	0.830685	96.3573
UP_KEYWORDS	Isopeptide bond	5	9.61538	0.307821	CD3EAP, CCND1, HIPK1, UBE2K, DDX39B	52	1132	20581	1.74818	1	0.870695	98.6905
GOTERM_CC_DIRECT	GO:0005654~nucleoplasm	9	17.3077	0.479136	BMI1, CD3EAP, FBXW7, CCND1, HIPK1, DDX39B, SPAG1, POLR1A, POLR2B	50	2784	18224	1.17828	1	0.999234	99.9146
Annotation Cluster 8	Enrichment Score: 0.15955317741106215
Category	Term	Count	%	PValue	Genes	List Total	Pop Hits	Pop Total	Fold Enrichment	Bonferroni	Benjamini	FDR
INTERPRO	IPR015880:Zinc finger, C2H2-like	3	5.76923	0.614309	HIVEP3, NUFIP1, KLF15	51	762	18559	1.43268	1	1	99.9989
INTERPRO	IPR007087:Zinc finger, C2H2	3	5.76923	0.640444	HIVEP3, NUFIP1, KLF15	51	799	18559	1.36634	1	1	99.9995
SMART	SM00355:ZnF_C2H2	3	5.76923	0.692576	HIVEP3, NUFIP1, KLF15	32	762	10057	1.23733	1	1	99.9979
GOTERM_MF_DIRECT	GO:0046872~metal ion binding	5	9.61538	0.844214	HIVEP3, NUFIP1, KLF15, FYCO1, POLR2B	48	2069	16881	0.849897	1	1	100
Annotation Cluster 9	Enrichment Score: 0.04580165797989168
Category	Term	Count	%	PValue	Genes	List Total	Pop Hits	Pop Total	Fold Enrichment	Bonferroni	Benjamini	FDR
UP_KEYWORDS	Signal	10	19.2308	0.728871	NCAM2, FBXW7, SLC13A5, HIPK1, CCL20, UBE2K, NUDT9, IGFBP1, TAPBPL, LGR5	52	4160	20581	0.951415	1	0.995184	100
UP_KEYWORDS	Disulfide bond	6	11.5385	0.943035	NCAM2, CCL20, ANPEP, IGFBP1, TAPBPL, LGR5	52	3434	20581	0.691535	1	0.999953	100
UP_SEQ_FEATURE	signal peptide	5	9.61538	0.973187	NCAM2, CCL20, IGFBP1, TAPBPL, LGR5	50	3346	20063	0.599611	1	1	100
UP_SEQ_FEATURE	disulfide bond	4	7.69231	0.980435	NCAM2, CCL20, IGFBP1, TAPBPL	50	2917	20063	0.550237	1	1	100
Annotation Cluster 10	Enrichment Score: 0.0386806922790113
Category	Term	Count	%	PValue	Genes	List Total	Pop Hits	Pop Total	Fold Enrichment	Bonferroni	Benjamini	FDR
GOTERM_CC_DIRECT	GO:0016021~integral component of membrane	13	25	0.772089	NCAM2, G6PC, SLC13A5, RNF5, DNAJC24, SLC25A47, MBOAT2, ANPEP, TAPBPL, LGR5, FYCO1, CEBPZOS, STXBP5L	50	5163	18224	0.91773	1	0.999993	100
UP_KEYWORDS	Membrane	17	32.6923	0.813714	SLC13A5, MINK1, ANPEP, LGR5, CEBPZOS, STXBP5L, NCAM2, G6PC, CCND1, RNF5, DNAJC24, MBOAT2, SLC25A47, TAPBPL, SEC24C, EWSR1, FABP6	52	7494	20581	0.897839	1	0.998737	100
GOTERM_CC_DIRECT	GO:0005887~integral component of plasma membrane	3	5.76923	0.902651	SLC13A5, ANPEP, LGR5	50	1415	18224	0.772749	1	0.999999	100
UP_KEYWORDS	Transmembrane helix	11	21.1538	0.923886	NCAM2, G6PC, SLC13A5, RNF5, DNAJC24, SLC25A47, MBOAT2, ANPEP, TAPBPL, LGR5, CEBPZOS	52	5634	20581	0.77275	1	0.999919	100
UP_KEYWORDS	Transmembrane	11	21.1538	0.925702	NCAM2, G6PC, SLC13A5, RNF5, DNAJC24, SLC25A47, MBOAT2, ANPEP, TAPBPL, LGR5, CEBPZOS	52	5651	20581	0.770425	1	0.999905	100
UP_SEQ_FEATURE	transmembrane region	9	17.3077	0.950773	NCAM2, G6PC, SLC13A5, RNF5, SLC25A47, MBOAT2, ANPEP, TAPBPL, LGR5	50	5056	20063	0.714268	1	1	100
UP_SEQ_FEATURE	topological domain:Cytoplasmic	5	9.61538	0.978481	NCAM2, G6PC, ANPEP, TAPBPL, LGR5	50	3456	20063	0.580527	1	1	100
UP_SEQ_FEATURE	glycosylation site:N-linked (GlcNAc...)	5	9.61538	0.995961	NCAM2, G6PC, SLC13A5, ANPEP, LGR5	50	4234	20063	0.473855	1	1	100
UP_KEYWORDS	Glycoprotein	5	9.61538	0.998282	NCAM2, G6PC, SLC13A5, ANPEP, LGR5	52	4551	20581	0.434837	1	1	100
